# Supplementary material for: Electron pairing in the pseudogap state revealed by shot noise in copper oxide junctions
Source: Springer Nature journal article supplement (doi:10.1038/s41586-019-1486-7), 2019-08-21
Supplement: MOESM6 [file 41586_2019_1486_MOESM6_ESM.xlsx]

## Sheet: Sheet2
Fig EXT 5a
Freq(Hz)	Sv (arb.)
0	1.22356e-05
100	2.74934e-05
200	2.45586e-05
300	9.62115e-06
400	2.65666e-06
500	1.0018e-06
600	7.78001e-07
700	6.94828e-07
800	6.75086e-07
900	6.51177e-07
1000	6.03077e-07
1100	6.37633e-07
1200	7.17284e-07
1300	6.68543e-07
1400	5.7257e-07
1500	5.63904e-07
1600	5.23494e-07
1700	5.61239e-07
1800	5.85289e-07
1900	5.65169e-07
2000	6.16542e-07
2100	6.22122e-07
2200	5.97758e-07
2300	5.51817e-07
2400	5.39539e-07
2500	6.17186e-07
2600	5.85472e-07
2700	6.24677e-07
2800	6.77188e-07
2900	6.71134e-07
3000	6.08799e-07
3100	5.75533e-07
3200	5.93168e-07
3300	6.76137e-07
3400	6.08438e-07
3500	5.74886e-07
3600	5.50276e-07
3700	5.09192e-07
3800	4.99126e-07
3900	5.25627e-07
4000	5.43254e-07
4100	5.49144e-07
4200	5.83413e-07
4300	5.2497e-07
4400	5.59873e-07
4500	5.15597e-07
4600	5.34227e-07
4700	5.07958e-07
4800	4.99955e-07
4900	5.67073e-07
5000	5.91343e-07
5100	5.43556e-07
5200	5.29529e-07
5300	5.48459e-07
5400	5.83938e-07
5500	5.91871e-07
5600	7.12882e-07
5700	6.20684e-07
5800	5.99709e-07
5900	6.24544e-07
6000	5.37453e-07
6100	5.55218e-07
6200	5.0297e-07
6300	4.66651e-07
6400	4.97564e-07
6500	4.89063e-07
6600	4.748e-07
6700	5.49883e-07
6800	5.5746e-07
6900	5.11454e-07
7000	5.60128e-07
7100	6.25399e-07
7200	5.90472e-07
7300	5.28981e-07
7400	5.54686e-07
7500	5.20277e-07
7600	5.8546e-07
7700	5.72404e-07
7800	5.2947e-07
7900	4.96485e-07
8000	5.04861e-07
8100	5.37176e-07
8200	4.96378e-07
8300	4.72116e-07
8400	5.15065e-07
8500	5.56099e-07
8600	5.49482e-07
8700	5.56026e-07
8800	6.2018e-07
8900	6.93784e-07
9000	5.71191e-07
9100	5.35001e-07
9200	5.49082e-07
9300	5.18423e-07
9400	4.91291e-07
9500	5.80611e-07
9600	7.05681e-07
9700	5.95312e-07
9800	5.33115e-07
9900	5.33247e-07
10000	5.40762e-07
10100	4.96696e-07
10200	4.97746e-07
10300	5.56173e-07
10400	6.01022e-07
10500	5.00102e-07
10600	4.84498e-07
10700	5.27879e-07
10800	5.52558e-07
10900	5.21249e-07
11000	4.99029e-07
11100	5.62832e-07
11200	6.00492e-07
11300	5.60913e-07
11400	5.44936e-07
11500	5.64846e-07
11600	5.73003e-07
11700	5.16866e-07
11800	4.96676e-07
11900	5.05005e-07
12000	5.21688e-07
12100	5.03177e-07
12200	5.03233e-07
12300	5.26456e-07
12400	5.115e-07
12500	5.4715e-07
12600	5.44857e-07
12700	5.1722e-07
12800	5.13767e-07
12900	5.55202e-07
13000	5.40596e-07
13100	5.30843e-07
13200	5.2534e-07
13300	5.68091e-07
13400	5.83934e-07
13500	5.32066e-07
13600	6.34671e-07
13700	5.22895e-07
13800	5.18867e-07
13900	5.38149e-07
14000	5.47528e-07
14100	5.26189e-07
14200	5.38313e-07
14300	5.19506e-07
14400	4.90159e-07
14500	5.18517e-07
14600	5.44088e-07
14700	5.56141e-07
14800	5.50512e-07
14900	5.18241e-07
15000	4.94086e-07
15100	5.33165e-07
15200	5.28433e-07
15300	4.70457e-07
15400	4.9567e-07
15500	5.13554e-07
15600	5.15609e-07
15700	5.31161e-07
15800	5.05259e-07
15900	5.51214e-07
16000	5.23518e-07
16100	5.08843e-07
16200	5.32797e-07
16300	5.51391e-07
16400	5.59732e-07
16500	5.52707e-07
16600	5.31421e-07
16700	5.04279e-07
16800	5.40354e-07
16900	5.03391e-07
17000	5.53447e-07
17100	5.25709e-07
17200	5.63898e-07
17300	5.59674e-07
17400	5.71465e-07
17500	5.56295e-07
17600	5.58012e-07
17700	5.19685e-07
17800	5.24324e-07
17900	5.25027e-07
18000	5.10684e-07
18100	5.1524e-07
18200	5.3985e-07
18300	5.86201e-07
18400	5.83968e-07
18500	5.42392e-07
18600	5.39925e-07
18700	5.00778e-07
18800	4.84041e-07
18900	4.61144e-07
19000	5.45535e-07
19100	6.05583e-07
19200	5.45822e-07
19300	5.43686e-07
19400	7.72049e-07
19500	0.000204
19600	0.000601
19700	0.00011
19800	6.43635e-07
19900	5.18178e-07
20000	4.67715e-07
20100	4.9128e-07
20200	5.40631e-07
20300	5.01939e-07
20400	5.30801e-07
20500	5.29028e-07
20600	5.81191e-07
20700	5.43162e-07
20800	4.98549e-07
20900	5.19786e-07
21000	7.25879e-07
21100	6.87767e-07
21200	5.19452e-07
21300	5.23482e-07
21400	4.95299e-07
21500	4.99812e-07
21600	5.587e-07
21700	5.77033e-07
21800	4.93171e-07
21900	5.07528e-07
22000	5.29297e-07
22100	4.95686e-07
22200	4.94891e-07
22300	5.20436e-07
22400	5.77696e-07
22500	5.68918e-07
22600	5.49362e-07
22700	5.61315e-07
22800	5.40355e-07
22900	5.37514e-07
23000	5.39671e-07
23100	5.9825e-07
23200	5.90236e-07
23300	6.54959e-07
23400	6.14972e-07
23500	5.25906e-07
23600	5.1362e-07
23700	5.34813e-07
23800	5.56964e-07
23900	5.56308e-07
24000	5.25097e-07
24100	5.48938e-07
24200	4.83542e-07
24300	4.87237e-07
24400	5.5048e-07
24500	5.53501e-07
24600	5.44109e-07
24700	5.49966e-07
24800	5.85616e-07
24900	6.18142e-07
25000	6.04476e-07
25100	5.84211e-07
25200	5.29261e-07
25300	6.23114e-07
25400	6.08063e-07
25500	5.62573e-07
25600	5.55085e-07
25700	5.26348e-07
25800	5.20911e-07
25900	5.12498e-07
26000	5.02068e-07
26100	5.43425e-07
26200	5.20343e-07
26300	5.209e-07
26400	5.11074e-07
26500	5.33076e-07
26600	6.20085e-07
26700	5.39857e-07
26800	5.12872e-07
26900	5.32965e-07
27000	4.87641e-07
27100	4.74422e-07
27200	4.79342e-07
27300	5.36273e-07
27400	6.02784e-07
27500	6.36857e-07
27600	4.89121e-07
27700	5.27223e-07
27800	5.14936e-07
27900	4.76646e-07
28000	5.24455e-07
28100	5.67768e-07
28200	5.61021e-07
28300	5.04324e-07
28400	5.73413e-07
28500	5.59498e-07
28600	6.55643e-07
28700	5.93101e-07
28800	4.92343e-07
28900	5.18859e-07
29000	5.49519e-07
29100	5.57883e-07
29200	5.34113e-07
29300	4.83541e-07
29400	4.9695e-07
29500	4.79114e-07
29600	5.77904e-07
29700	5.6545e-07
29800	5.16223e-07
29900	5.27968e-07
30000	5.2861e-07
30100	5.54446e-07
30200	5.21033e-07
30300	5.64796e-07
30400	5.54441e-07
30500	5.16214e-07
30600	5.09787e-07
30700	5.41291e-07
30800	5.18167e-07
30900	6.14887e-07
31000	5.39491e-07
31100	5.08607e-07
31200	5.84748e-07
31300	5.46798e-07
31400	5.20559e-07
31500	5.74455e-07
31600	5.27e-07
31700	4.86043e-07
31800	5.17784e-07
31900	5.0015e-07
32000	5.01832e-07
32100	5.38368e-07
32200	5.43195e-07
32300	5.28269e-07
32400	5.49758e-07
32500	5.16592e-07
32600	4.90142e-07
32700	4.62997e-07
32800	5.63167e-07
32900	5.67315e-07
33000	6.37796e-07
33100	6.03623e-07
33200	5.20595e-07
33300	4.9682e-07
33400	4.83022e-07
33500	4.58755e-07
33600	4.81766e-07
33700	5.02219e-07
33800	5.38145e-07
33900	5.54648e-07
34000	4.96304e-07
34100	5.57639e-07
34200	5.42378e-07
34300	5.1325e-07
34400	6.20285e-07
34500	6.33246e-07
34600	5.14428e-07
34700	4.92922e-07
34800	4.91152e-07
34900	5.41875e-07
35000	5.25017e-07
35100	5.76417e-07
35200	5.34734e-07
35300	5.39769e-07
35400	5.32383e-07
35500	4.91625e-07
35600	4.81946e-07
35700	5.11645e-07
35800	5.94353e-07
35900	7.30339e-07
36000	6.77265e-07
36100	5.13615e-07
36200	5.01236e-07
36300	5.44381e-07
36400	5.13955e-07
36500	5.20392e-07
36600	4.95785e-07
36700	4.85812e-07
36800	5.40329e-07
36900	5.55416e-07
37000	4.93643e-07
37100	5.10792e-07
37200	5.13608e-07
37300	5.02962e-07
37400	5.57271e-07
37500	5.11582e-07
37600	5.00217e-07
37700	5.15784e-07
37800	5.72978e-07
37900	5.77867e-07
38000	5.2301e-07
38100	5.21447e-07
38200	4.81113e-07
38300	5.12326e-07
38400	5.25574e-07
38500	5.06749e-07
38600	5.1681e-07
38700	5.11156e-07
38800	4.54799e-07
38900	4.72277e-07
39000	9.98014e-07
39100	8.37541e-05
39200	0.000185
39300	2.43389e-05
39400	7.01676e-07
39500	4.91016e-07
39600	4.96421e-07
39700	4.906e-07
39800	5.08721e-07
39900	5.28367e-07
40000	5.52982e-07
40100	5.80397e-07
40200	6.52945e-07
40300	5.43413e-07
40400	5.29068e-07
40500	5.37809e-07
40600	5.28118e-07
40700	5.09968e-07
40800	5.00725e-07
40900	4.80005e-07
41000	4.78033e-07
41100	5.38115e-07
41200	5.39835e-07
41300	5.87585e-07
41400	5.83556e-07
41500	5.71191e-07
41600	5.09455e-07
41700	5.44141e-07
41800	5.90514e-07
41900	5.28644e-07
42000	5.07107e-07
42100	4.98327e-07
42200	4.71631e-07
42300	5.2716e-07
42400	5.62824e-07
42500	5.50216e-07
42600	5.03909e-07
42700	5.40817e-07
42800	5.33467e-07
42900	5.21724e-07
43000	5.32773e-07
43100	5.15868e-07
43200	4.7851e-07
43300	4.79992e-07
43400	5.17397e-07
43500	5.75319e-07
43600	5.70722e-07
43700	4.82219e-07
43800	4.8447e-07
43900	4.77224e-07
44000	5.25697e-07
44100	5.25897e-07
44200	5.29393e-07
44300	5.12843e-07
44400	5.12379e-07
44500	5.2918e-07
44600	5.25154e-07
44700	5.14462e-07
44800	5.77716e-07
44900	6.0338e-07
45000	5.15749e-07
45100	4.91853e-07
45200	4.68818e-07
45300	4.57549e-07
45400	5.03237e-07
45500	5.08453e-07
45600	5.29485e-07
45700	4.94418e-07
45800	4.70237e-07
45900	5.21893e-07
46000	5.23267e-07
46100	5.22084e-07
46200	5.11903e-07
46300	4.87766e-07
46400	4.83161e-07
46500	5.1485e-07
46600	5.79229e-07
46700	5.40182e-07
46800	5.1675e-07
46900	5.05471e-07
47000	5.12114e-07
47100	5.19437e-07
47200	4.99281e-07
47300	4.84671e-07
47400	5.44569e-07
47500	6.17693e-07
47600	5.61142e-07
47700	4.14732e-07
47800	4.96263e-07
47900	5.85623e-07
48000	5.92309e-07
48100	5.31641e-07
48200	5.36021e-07
48300	5.20531e-07
48400	5.16928e-07
48500	5.70361e-07
48600	5.46742e-07
48700	4.91583e-07
48800	4.89837e-07
48900	6.33887e-07
49000	5.46058e-07
49100	4.90075e-07
49200	4.45633e-07
49300	4.89533e-07
49400	5.52941e-07
49500	6.14014e-07
49600	5.75769e-07
49700	5.09969e-07
49800	4.60196e-07
49900	5.32238e-07
50000	5.26375e-07
50100	5.51639e-07
50200	5.86045e-07
50300	5.7299e-07
50400	5.41305e-07
50500	5.44001e-07
50600	6.37027e-07
50700	7.16638e-07
50800	6.44433e-07
50900	5.43828e-07
51000	5.68605e-07
51100	5.77048e-07
51200	5.63714e-07
51300	5.40467e-07
51400	5.60516e-07
51500	6.0867e-07
51600	5.51374e-07
51700	5.94948e-07
51800	5.63398e-07
51900	5.39915e-07
52000	5.49797e-07
52100	5.87121e-07
52200	5.9202e-07
52300	5.37494e-07
52400	5.67447e-07
52500	5.51939e-07
52600	5.32857e-07
52700	5.45295e-07
52800	4.76071e-07
52900	5.21121e-07
53000	4.98375e-07
53100	4.74568e-07
53200	4.78876e-07
53300	5.0196e-07
53400	4.92563e-07
53500	4.99088e-07
53600	4.98772e-07
53700	4.63964e-07
53800	4.28433e-07
53900	4.37947e-07
54000	5.24998e-07
54100	5.55747e-07
54200	5.09834e-07
54300	4.66518e-07
54400	5.3158e-07
54500	5.35425e-07
54600	4.73134e-07
54700	5.07084e-07
54800	5.05782e-07
54900	5.11874e-07
55000	5.39749e-07
55100	5.29367e-07
55200	5.62119e-07
55300	6.03e-07
55400	4.91274e-07
55500	4.81203e-07
55600	4.66021e-07
55700	5.23394e-07
55800	5.1379e-07
55900	5.33665e-07
56000	4.94782e-07
56100	4.72264e-07
56200	4.76171e-07
56300	4.93877e-07
56400	5.27737e-07
56500	4.8676e-07
56600	4.90403e-07
56700	4.99064e-07
56800	4.93514e-07
56900	5.03402e-07
57000	5.05923e-07
57100	5.14006e-07
57200	5.63752e-07
57300	5.15341e-07
57400	4.82623e-07
57500	5.21284e-07
57600	5.05787e-07
57700	4.6438e-07
57800	5.15361e-07
57900	5.44304e-07
58000	4.49797e-07
58100	5.21212e-07
58200	5.24977e-07
58300	5.09801e-07
58400	5.19448e-07
58500	5.24222e-07
58600	1.14128e-06
58700	5.41574e-05
58800	9.03286e-05
58900	8.46527e-06
59000	5.94887e-07
59100	5.20256e-07
59200	5.16829e-07
59300	5.30757e-07
59400	4.9295e-07
59500	4.68716e-07
59600	5.1495e-07
59700	5.49713e-07
59800	4.99083e-07
59900	4.88611e-07
60000	5.97392e-07
60100	5.62536e-07
60200	5.25488e-07
60300	5.39385e-07
60400	5.05106e-07
60500	4.85855e-07
60600	4.78815e-07
60700	5.42315e-07
60800	5.42648e-07
60900	5.23473e-07
61000	4.82389e-07
61100	4.41207e-07
61200	4.38007e-07
61300	5.17109e-07
61400	5.53599e-07
61500	5.14099e-07
61600	4.81444e-07
61700	5.13749e-07
61800	4.72965e-07
61900	4.85736e-07
62000	4.88253e-07
62100	4.96267e-07
62200	5.10302e-07
62300	4.9435e-07
62400	5.3523e-07
62500	6.1846e-07
62600	5.28003e-07
62700	5.44236e-07
62800	4.80468e-07
62900	4.43997e-07
63000	4.7067e-07
63100	4.49446e-07
63200	4.49115e-07
63300	4.965e-07
63400	4.75981e-07
63500	4.50552e-07
63600	4.64874e-07
63700	4.56454e-07
63800	4.94797e-07
63900	5.31214e-07
64000	4.64399e-07
64100	4.93863e-07
64200	5.13669e-07
64300	5.03755e-07
64400	5.28298e-07
64500	5.74908e-07
64600	5.24602e-07
64700	4.55237e-07
64800	4.84404e-07
64900	4.92263e-07
65000	5.0039e-07
65100	5.29846e-07
65200	5.22508e-07
65300	4.58056e-07
65400	4.29957e-07
65500	4.39889e-07
65600	4.26395e-07
65700	4.90632e-07
65800	4.68295e-07
65900	4.94201e-07
66000	4.96083e-07
66100	5.13593e-07
66200	5.32968e-07
66300	4.62944e-07
66400	4.88742e-07
66500	5.0627e-07
66600	4.98472e-07
66700	5.10451e-07
66800	6.11114e-07
66900	6.28807e-07
67000	6.04785e-07
67100	6.54943e-07
67200	7.12706e-07
67300	1.19819e-06
67400	2.0307e-06
67500	2.22924e-06
67600	1.30721e-06
67700	7.35793e-07
67800	6.60748e-07
67900	7.18282e-07
68000	9.80605e-07
68100	1.29227e-06
68200	3.47175e-06
68300	2.03049e-05
68400	1.73749e-05
68500	7.49178e-06
68600	1.85505e-06
68700	8.49361e-07
68800	5.24821e-07
68900	5.67739e-07
69000	5.29621e-07
69100	5.14998e-07
69200	5.07491e-07
69300	5.43409e-07
69400	5.30222e-07
69500	5.26127e-07
69600	5.36011e-07
69700	4.80007e-07
69800	4.78016e-07
69900	4.65066e-07
70000	4.63294e-07
70100	4.53253e-07
70200	4.78907e-07
70300	5.40799e-07
70400	5.6047e-07
70500	4.54771e-07
70600	4.52585e-07
70700	4.95242e-07
70800	4.67954e-07
70900	4.66487e-07
71000	4.57009e-07
71100	4.59874e-07
71200	4.58302e-07
71300	4.85257e-07
71400	4.95984e-07
71500	4.56299e-07
71600	4.92896e-07
71700	4.65993e-07
71800	4.11476e-07
71900	4.74525e-07
72000	5.6988e-07
72100	5.3037e-07
72200	4.92789e-07
72300	4.49052e-07
72400	4.19569e-07
72500	4.57145e-07
72600	4.64189e-07
72700	4.98678e-07
72800	4.79139e-07
72900	4.97585e-07
73000	5.02171e-07
73100	4.67371e-07
73200	4.61228e-07
73300	4.72777e-07
73400	4.97073e-07
73500	5.14403e-07
73600	5.30199e-07
73700	5.11495e-07
73800	5.18041e-07
73900	5.23477e-07
74000	4.98125e-07
74100	5.80717e-07
74200	5.33306e-07
74300	5.00424e-07
74400	5.26569e-07
74500	5.20167e-07
74600	4.74766e-07
74700	4.67694e-07
74800	4.96316e-07
74900	5.38135e-07
75000	5.27329e-07
75100	4.54859e-07
75200	4.97947e-07
75300	5.06468e-07
75400	5.01404e-07
75500	5.01381e-07
75600	4.526e-07
75700	4.65699e-07
75800	4.65104e-07
75900	4.88136e-07
76000	5.94166e-07
76100	6.71319e-07
76200	6.05463e-07
76300	5.62482e-07
76400	5.56605e-07
76500	5.31107e-07
76600	5.09465e-07
76700	5.0205e-07
76800	5.44708e-07
76900	5.32217e-07
77000	5.37388e-07
77100	5.20229e-07
77200	5.00179e-07
77300	5.77971e-07
77400	5.87301e-07
77500	5.05358e-07
77600	5.2209e-07
77700	6.04559e-07
77800	5.73523e-07
77900	5.53759e-07
78000	5.87862e-07
78100	5.72359e-07
78200	2.23451e-06
78300	6.01098e-05
78400	7.613e-05
78500	5.12171e-06
78600	5.68249e-07
78700	5.17482e-07
78800	4.8893e-07
78900	5.18537e-07
79000	5.23948e-07
79100	5.41372e-07
79200	5.7567e-07
79300	5.6134e-07
79400	5.51709e-07
79500	5.6091e-07
79600	5.73531e-07
79700	5.91208e-07
79800	6.11152e-07
79900	5.93133e-07
80000	5.52658e-07
80100	5.54856e-07
80200	4.95472e-07
80300	5.33783e-07
80400	6.21168e-07
80500	6.20425e-07
80600	5.81273e-07
80700	5.60766e-07
80800	5.13188e-07
80900	5.63377e-07
81000	5.1427e-07
81100	5.94261e-07
81200	5.3203e-07
81300	5.38623e-07
81400	5.23326e-07
81500	5.11689e-07
81600	5.64981e-07
81700	5.63867e-07
81800	5.06202e-07
81900	5.8979e-07
82000	5.30003e-07
82100	4.67044e-07
82200	4.32333e-07
82300	5.12296e-07
82400	5.53927e-07
82500	4.98728e-07
82600	4.52364e-07
82700	5.091e-07
82800	5.53824e-07
82900	4.60008e-07
83000	4.69103e-07
83100	5.09959e-07
83200	5.56324e-07
83300	4.81783e-07
83400	4.79037e-07
83500	5.04214e-07
83600	4.87567e-07
83700	4.94574e-07
83800	5.03506e-07
83900	4.38623e-07
84000	4.45378e-07
84100	5.45663e-07
84200	4.59827e-07
84300	4.2953e-07
84400	4.59047e-07
84500	4.60856e-07
84600	5.26488e-07
84700	4.80767e-07
84800	4.54519e-07
84900	4.08829e-07
85000	4.78891e-07
85100	5.29905e-07
85200	5.1297e-07
85300	4.92825e-07
85400	4.23113e-07
85500	4.50287e-07
85600	4.86171e-07
85700	4.79412e-07
85800	4.51627e-07
85900	4.38894e-07
86000	4.77322e-07
86100	5.05132e-07
86200	4.50078e-07
86300	4.55481e-07
86400	4.74713e-07
86500	4.91463e-07
86600	4.58197e-07
86700	4.33684e-07
86800	4.17475e-07
86900	4.7241e-07
87000	4.76232e-07
87100	4.03809e-07
87200	4.49166e-07
87300	4.71518e-07
87400	4.59578e-07
87500	4.70714e-07
87600	4.76349e-07
87700	4.44352e-07
87800	4.53322e-07
87900	4.65839e-07
88000	4.76104e-07
88100	4.32752e-07
88200	4.29226e-07
88300	4.91042e-07
88400	4.79212e-07
88500	4.78059e-07
88600	4.51666e-07
88700	4.13035e-07
88800	4.40079e-07
88900	4.61383e-07
89000	4.55718e-07
89100	4.503e-07
89200	4.30503e-07
89300	4.23918e-07
89400	4.87901e-07
89500	5.1589e-07
89600	4.97797e-07
89700	4.80916e-07
89800	5.08148e-07
89900	4.86215e-07
90000	4.65475e-07
90100	3.98853e-07
90200	4.5396e-07
90300	5.63375e-07
90400	5.08527e-07
90500	4.60625e-07
90600	4.36536e-07
90700	4.17594e-07
90800	4.12165e-07
90900	4.13739e-07
91000	4.7385e-07
91100	4.19345e-07
91200	4.09687e-07
91300	4.14932e-07
91400	4.47667e-07
91500	4.50064e-07
91600	4.42071e-07
91700	4.39224e-07
91800	4.00818e-07
91900	4.60285e-07
92000	4.9228e-07
92100	4.22235e-07
92200	4.24758e-07
92300	4.48907e-07
92400	5.11004e-07
92500	4.79152e-07
92600	4.27049e-07
92700	3.90647e-07
92800	4.07682e-07
92900	4.39261e-07
93000	4.14412e-07
93100	4.32355e-07
93200	4.02199e-07
93300	3.9966e-07
93400	3.99283e-07
93500	4.34586e-07
93600	4.29818e-07
93700	3.99601e-07
93800	4.46097e-07
93900	4.45785e-07
94000	3.93466e-07
94100	4.45788e-07
94200	4.75871e-07
94300	4.42093e-07
94400	5.42117e-07
94500	4.78001e-07
94600	4.64981e-07
94700	4.63551e-07
94800	4.05567e-07
94900	3.95424e-07
95000	4.42036e-07
95100	4.10239e-07
95200	3.72525e-07
95300	4.0125e-07
95400	4.27665e-07
95500	3.83938e-07
95600	3.96742e-07
95700	4.49654e-07
95800	4.13076e-07
95900	4.15795e-07
96000	4.62008e-07
96100	4.3046e-07
96200	4.34525e-07
96300	4.21699e-07
96400	4.18638e-07
96500	4.85888e-07
96600	5.14415e-07
96700	4.39523e-07
96800	4.17703e-07
96900	4.71966e-07
97000	4.6221e-07
97100	4.40513e-07
97200	4.67703e-07
97300	4.99037e-07
97400	4.84714e-07
97500	4.34211e-07
97600	4.21098e-07
97700	4.93819e-07
97800	3.7481e-06
97900	7.83937e-05
98000	7.5778e-05
98100	3.20335e-06
98200	5.28882e-07
98300	4.12691e-07
98400	4.23871e-07
98500	3.73556e-07
98600	3.98951e-07
98700	4.09934e-07
98800	3.86097e-07
98900	4.11442e-07
99000	4.00572e-07
99100	4.13164e-07
99200	4.15867e-07
99300	4.3131e-07
99400	4.77691e-07
99500	5.28482e-07
99600	4.35355e-07
99700	4.63529e-07
99800	4.29852e-07
99900	3.77587e-07
100000	3.85336e-07
100100	4.47663e-07
100200	4.27867e-07
100300	4.21909e-07
100400	4.58895e-07
100500	5.07722e-07
100600	5.52483e-07
100700	4.38429e-07
100800	3.92624e-07
100900	3.80301e-07
101000	4.74812e-07
101100	5.05069e-07
101200	4.56957e-07
101300	4.65904e-07
101400	4.26224e-07
101500	4.39181e-07
101600	4.25521e-07
101700	4.20151e-07
101800	5.12722e-07
101900	5.4527e-07
102000	4.36586e-07
102100	4.11364e-07
102200	3.84402e-07
102300	3.96352e-07
102400	4.33145e-07
102500	4.24786e-07
102600	4.06344e-07
102700	3.69069e-07
102800	3.71703e-07
102900	4.05844e-07
103000	4.36763e-07
103100	4.42237e-07
103200	4.42574e-07
103300	3.99882e-07
103400	4.29231e-07
103500	4.05718e-07
103600	4.07675e-07
103700	4.4793e-07
103800	4.38665e-07
103900	4.19449e-07
104000	4.14934e-07
104100	4.37125e-07
104200	4.01142e-07
104300	3.87597e-07
104400	4.04009e-07
104500	4.09068e-07
104600	4.12633e-07
104700	4.09365e-07
104800	4.33157e-07
104900	4.45913e-07
105000	4.10997e-07
105100	4.55625e-07
105200	4.74196e-07
105300	3.62376e-07
105400	3.68838e-07
105500	3.77227e-07
105600	3.98062e-07
105700	4.33372e-07
105800	3.94419e-07
105900	4.11181e-07
106000	4.22439e-07
106100	4.55682e-07
106200	4.33949e-07
106300	3.89682e-07
106400	4.14745e-07
106500	4.46696e-07
106600	4.31401e-07
106700	4.24342e-07
106800	4.14258e-07
106900	3.99631e-07
107000	4.34699e-07
107100	4.2675e-07
107200	4.85049e-07
107300	4.49452e-07
107400	4.39065e-07
107500	3.75266e-07
107600	4.17903e-07
107700	4.03564e-07
107800	3.7154e-07
107900	3.67888e-07
108000	4.00775e-07
108100	3.99963e-07
108200	4.01912e-07
108300	4.21859e-07
108400	4.10667e-07
108500	4.3912e-07
108600	4.30221e-07
108700	3.90007e-07
108800	4.06964e-07
108900	4.43927e-07
109000	4.52612e-07
109100	4.09864e-07
109200	4.06724e-07
109300	3.90292e-07
109400	3.87985e-07
109500	4.00363e-07
109600	3.88854e-07
109700	3.75299e-07
109800	3.62625e-07
109900	3.57234e-07
110000	4.28064e-07
110100	4.02752e-07
110200	3.80782e-07
110300	4.02583e-07
110400	4.37213e-07
110500	4.76451e-07
110600	5.22938e-07
110700	4.57445e-07
110800	4.22282e-07
110900	4.04893e-07
111000	4.54809e-07
111100	4.8927e-07
111200	4.21718e-07
111300	4.0136e-07
111400	3.6163e-07
111500	3.56734e-07
111600	3.75563e-07
111700	4.17015e-07
111800	4.35939e-07
111900	4.35884e-07
112000	4.01304e-07
112100	4.2741e-07
112200	4.98082e-07
112300	4.05984e-07
112400	3.59175e-07
112500	3.8194e-07
112600	3.99923e-07
112700	3.80086e-07
112800	3.81203e-07
112900	4.08196e-07
113000	4.57313e-07
113100	4.16482e-07
113200	3.96377e-07
113300	4.16217e-07
113400	4.45279e-07
113500	4.58812e-07
113600	4.4989e-07
113700	4.23164e-07
113800	4.15457e-07
113900	4.208e-07
114000	4.22503e-07
114100	4.11288e-07
114200	3.82398e-07
114300	3.94716e-07
114400	4.20774e-07
114500	3.96884e-07
114600	3.96527e-07
114700	3.64146e-07
114800	3.94965e-07
114900	4.91808e-07
115000	4.65488e-07
115100	3.85642e-07
115200	3.90778e-07
115300	4.79731e-07
115400	4.13371e-07
115500	3.66724e-07
115600	4.03219e-07
115700	4.11052e-07
115800	4.42739e-07
115900	4.47204e-07
116000	4.32271e-07
116100	4.71677e-07
116200	4.49363e-07
116300	4.19178e-07
116400	4.28518e-07
116500	3.53031e-07
116600	3.58461e-07
116700	3.94494e-07
116800	3.91478e-07
116900	3.48876e-07
117000	3.73052e-07
117100	3.77885e-07
117200	4.08398e-07
117300	4.51606e-07
117400	6.48131e-06
117500	9.04661e-05
117600	6.6698e-05
117700	1.85686e-06
117800	4.11004e-07
117900	4.0069e-07
118000	4.31203e-07
118100	4.34778e-07
118200	4.08219e-07
118300	4.16456e-07
118400	4.23672e-07
118500	4.2567e-07
118600	3.89818e-07
118700	3.75323e-07
118800	3.42103e-07
118900	3.79217e-07
119000	4.10077e-07
119100	4.36529e-07
119200	4.18069e-07
119300	3.66259e-07
119400	3.93251e-07
119500	3.91653e-07
119600	3.89747e-07
119700	4.04363e-07
119800	3.98322e-07
119900	3.30803e-07
120000	3.84312e-07
120100	4.39208e-07
120200	4.01398e-07
120300	3.54026e-07
120400	3.69136e-07
120500	3.84805e-07
120600	3.67318e-07
120700	3.48227e-07
120800	3.6704e-07
120900	3.70333e-07
121000	3.69675e-07
121100	4.33051e-07
121200	3.99731e-07
121300	3.89999e-07
121400	3.93611e-07
121500	4.35794e-07
121600	4.50678e-07
121700	3.63479e-07
121800	3.6174e-07
121900	3.78564e-07
122000	3.76543e-07
122100	4.06477e-07
122200	4.01136e-07
122300	4.03027e-07
122400	3.51327e-07
122500	3.40549e-07
122600	3.7003e-07
122700	3.6315e-07
122800	3.67535e-07
122900	3.57577e-07
123000	3.73613e-07
123100	3.88705e-07
123200	3.69514e-07
123300	3.47238e-07
123400	3.57278e-07
123500	3.69635e-07
123600	3.98936e-07
123700	4.34202e-07
123800	4.21775e-07
123900	3.99998e-07
124000	4.21891e-07
124100	4.19028e-07
124200	3.83057e-07
124300	3.66602e-07
124400	3.74393e-07
124500	3.95008e-07
124600	3.98515e-07
124700	3.955e-07
124800	3.46636e-07
124900	3.85918e-07
125000	4.1034e-07
125100	4.09919e-07
125200	3.8343e-07
125300	4.05308e-07
125400	3.57912e-07
125500	3.43987e-07
125600	3.45451e-07
125700	3.61442e-07
125800	3.96359e-07
125900	3.92048e-07
126000	4.05649e-07
126100	4.23529e-07
126200	4.03294e-07
126300	3.74805e-07
126400	3.75283e-07
126500	3.75357e-07
126600	3.69062e-07
126700	3.79867e-07
126800	3.80731e-07
126900	3.86488e-07
127000	4.0552e-07
127100	4.65182e-07
127200	4.43422e-07
127300	4.13742e-07
127400	4.27361e-07
127500	4.14837e-07
127600	3.90174e-07
127700	3.72664e-07
127800	3.79339e-07
127900	4.00623e-07
128000	4.10812e-07
128100	3.86454e-07
128200	3.76893e-07
128300	4.03268e-07
128400	3.64278e-07
128500	3.63466e-07
128600	3.79753e-07
128700	3.53313e-07
128800	3.61152e-07
128900	3.91859e-07
129000	3.76811e-07
129100	3.67248e-07
129200	3.81057e-07
129300	3.48162e-07
129400	3.16415e-07
129500	3.70868e-07
129600	3.99921e-07
129700	3.96388e-07
129800	4.0865e-07
129900	3.63906e-07
130000	3.63288e-07
130100	3.5743e-07
130200	3.42602e-07
130300	3.79448e-07
130400	3.82939e-07
130500	3.51241e-07
130600	3.43844e-07
130700	4.16121e-07
130800	4.26496e-07
130900	4.17673e-07
131000	4.10488e-07
131100	3.51347e-07
131200	3.44898e-07
131300	3.5254e-07
131400	3.4833e-07
131500	3.29866e-07
131600	3.12234e-07
131700	3.32853e-07
131800	3.92439e-07
131900	3.94075e-07
132000	3.41653e-07
132100	3.4643e-07
132200	3.14779e-07
132300	3.01079e-07
132400	3.40176e-07
132500	3.63302e-07
132600	3.51093e-07
132700	3.49122e-07
132800	3.34018e-07
132900	3.78204e-07
133000	3.60404e-07
133100	3.18868e-07
133200	3.37099e-07
133300	3.44758e-07
133400	3.63937e-07
133500	3.9933e-07
133600	4.3437e-07
133700	4.09205e-07
133800	3.60347e-07
133900	3.43039e-07
134000	3.51108e-07
134100	3.49107e-07
134200	3.41265e-07
134300	3.37893e-07
134400	3.66303e-07
134500	3.88073e-07
134600	3.89728e-07
134700	3.89796e-07
134800	3.82242e-07
134900	3.70233e-07
135000	3.26316e-07
135100	3.1453e-07
135200	3.70877e-07
135300	3.79766e-07
135400	3.24394e-07
135500	3.46684e-07
135600	3.73875e-07
135700	3.79681e-07
135800	3.72485e-07
135900	3.59059e-07
136000	3.97014e-07
136100	3.79031e-07
136200	3.54372e-07
136300	3.69036e-07
136400	4.08882e-07
136500	4.00892e-07
136600	3.64253e-07
136700	3.57136e-07
136800	3.942e-07
136900	4.9825e-07
137000	1.83439e-05
137100	0.000186
137200	0.000105
137300	1.58989e-06
137400	3.8781e-07
137500	3.77459e-07
137600	3.54902e-07
137700	3.64261e-07
137800	3.68377e-07
137900	3.55323e-07
138000	3.74081e-07
138100	3.62331e-07
138200	3.70404e-07
138300	3.52949e-07
138400	3.70043e-07
138500	3.60471e-07
138600	3.1811e-07
138700	3.25938e-07
138800	3.22571e-07
138900	3.64497e-07
139000	3.7146e-07
139100	3.43247e-07
139200	3.45204e-07
139300	3.36558e-07
139400	3.68158e-07
139500	3.86643e-07
139600	3.65851e-07
139700	3.38875e-07
139800	3.2577e-07
139900	3.16406e-07
140000	3.27295e-07
140100	3.43248e-07
140200	3.89088e-07
140300	4.02062e-07
140400	3.86904e-07
140500	3.45646e-07
140600	3.29401e-07
140700	3.6544e-07
140800	3.38254e-07
140900	3.66215e-07
141000	3.78916e-07
141100	3.32079e-07
141200	3.61404e-07
141300	3.81722e-07
141400	3.78092e-07
141500	3.45907e-07
141600	3.59866e-07
141700	3.37532e-07
141800	3.17048e-07
141900	3.50853e-07
142000	3.29542e-07
142100	3.80636e-07
142200	4.26529e-07
142300	3.8207e-07
142400	3.11586e-07
142500	3.00791e-07
142600	3.74565e-07
142700	3.61898e-07
142800	3.52802e-07
142900	3.47043e-07
143000	3.30617e-07
143100	3.70533e-07
143200	3.66719e-07
143300	3.60213e-07
143400	3.5126e-07
143500	3.16874e-07
143600	3.30616e-07
143700	4.04696e-07
143800	3.38044e-07
143900	3.26123e-07
144000	3.83303e-07
144100	3.66394e-07
144200	3.96268e-07
144300	3.39768e-07
144400	3.87066e-07
144500	3.48577e-07
144600	3.28919e-07
144700	3.3967e-07
144800	3.81462e-07
144900	3.86793e-07
145000	3.54836e-07
145100	3.27449e-07
145200	3.25285e-07
145300	3.14329e-07
145400	3.09431e-07
145500	3.31831e-07
145600	3.5441e-07
145700	3.33719e-07
145800	3.66976e-07
145900	3.81723e-07
146000	3.29101e-07
146100	3.08345e-07
146200	3.4312e-07
146300	3.42259e-07
146400	3.44397e-07
146500	3.39352e-07
146600	3.27526e-07
146700	3.42267e-07
146800	3.28757e-07
146900	3.2904e-07
147000	3.6161e-07
147100	3.85186e-07
147200	3.44785e-07
147300	3.30932e-07
147400	3.57398e-07
147500	3.54359e-07
147600	3.40922e-07
147700	3.54602e-07
147800	3.48936e-07
147900	3.8114e-07
148000	3.6277e-07
148100	3.6142e-07
148200	3.52592e-07
148300	3.6307e-07
148400	3.35114e-07
148500	3.28935e-07
148600	3.42939e-07
148700	3.45107e-07
148800	3.67552e-07
148900	3.17017e-07
149000	3.27529e-07
149100	3.52117e-07
149200	3.60764e-07
149300	3.55373e-07
149400	3.45382e-07
149500	3.22233e-07
149600	3.57688e-07
149700	3.56475e-07
149800	3.41377e-07
149900	3.50397e-07
150000	3.45115e-07
150100	3.16847e-07
150200	3.01034e-07
150300	3.19467e-07
150400	3.06399e-07
150500	2.96212e-07
150600	3.77137e-07
150700	3.72818e-07
150800	3.25447e-07
150900	3.36208e-07
151000	3.70295e-07
151100	3.85347e-07
151200	3.5871e-07
151300	3.28968e-07
151400	3.50108e-07
151500	3.74033e-07
151600	3.7416e-07
151700	3.35532e-07
151800	3.02391e-07
151900	3.26433e-07
152000	3.37833e-07
152100	3.29202e-07
152200	3.37399e-07
152300	3.06183e-07
152400	2.85513e-07
152500	3.14143e-07
152600	3.23036e-07
152700	3.2119e-07
152800	3.60578e-07
152900	3.28855e-07
153000	3.52748e-07
153100	3.20265e-07
153200	3.46841e-07
153300	3.14596e-07
153400	3.09825e-07
153500	3.10745e-07
153600	3.06503e-07
153700	3.44322e-07
153800	3.11044e-07
153900	3.16333e-07
154000	3.41821e-07
154100	3.2702e-07
154200	3.11954e-07
154300	3.11095e-07
154400	3.29275e-07
154500	3.55076e-07
154600	3.21229e-07
154700	3.41246e-07
154800	3.4061e-07
154900	3.65404e-07
155000	3.68438e-07
155100	3.5966e-07
155200	3.54175e-07
155300	3.3206e-07
155400	3.26087e-07
155500	3.30937e-07
155600	3.22699e-07
155700	3.25448e-07
155800	3.26462e-07
155900	3.99253e-07
156000	3.72849e-07
156100	2.97778e-07
156200	3.16464e-07
156300	3.27772e-07
156400	3.22861e-07
156500	4.27955e-07
156600	2.80386e-05
156700	0.0002
156800	8.45481e-05
156900	6.92011e-07
157000	3.21456e-07
157100	2.98396e-07
157200	3.06278e-07
157300	3.16425e-07
157400	3.10877e-07
157500	3.11894e-07
157600	3.29893e-07
157700	3.34854e-07
157800	2.93095e-07
157900	2.7478e-07
158000	3.23393e-07
158100	3.82549e-07
158200	3.24993e-07
158300	3.23359e-07
158400	3.66796e-07
158500	3.01773e-07
158600	3.17558e-07
158700	3.73192e-07
158800	3.78296e-07
158900	3.46592e-07
159000	3.34037e-07
159100	3.10085e-07
159200	3.52914e-07
159300	3.90458e-07
159400	3.64185e-07
159500	3.54638e-07
159600	3.47362e-07
159700	3.222e-07
159800	3.41514e-07
159900	3.04386e-07
160000	3.09543e-07
160100	3.09551e-07
160200	3.8999e-07
160300	3.61206e-07
160400	3.14506e-07
160500	3.30729e-07
160600	3.26492e-07
160700	3.75288e-07
160800	3.85657e-07
160900	3.69712e-07
161000	3.61624e-07
161100	3.89566e-07
161200	3.34829e-07
161300	3.67709e-07
161400	3.70515e-07
161500	3.69928e-07
161600	3.90982e-07
161700	3.36009e-07
161800	4.41957e-07
161900	4.6325e-07
162000	1.16454e-06
162100	2.88919e-06
162200	8.46945e-07
162300	3.48632e-07
162400	3.34573e-07
162500	3.33221e-07
162600	4.10248e-07
162700	3.70383e-07
162800	3.63298e-07
162900	3.51785e-07
163000	3.29377e-07
163100	4.51258e-07
163200	3.58884e-07
163300	3.04372e-07
163400	3.18789e-07
163500	3.10106e-07
163600	2.93698e-07
163700	3.28226e-07
163800	3.28315e-07
163900	3.06142e-07
164000	3.06825e-07
164100	3.24493e-07
164200	3.03929e-07
164300	3.29504e-07
164400	3.42165e-07
164500	3.15017e-07
164600	3.2714e-07
164700	3.03595e-07
164800	3.32183e-07
164900	3.21788e-07
165000	3.35421e-07
165100	3.87517e-07
165200	3.42025e-07
165300	2.98848e-07
165400	3.05533e-07
165500	3.08736e-07
165600	3.12532e-07
165700	2.96803e-07
165800	3.15515e-07
165900	3.07648e-07
166000	3.1499e-07
166100	3.2514e-07
166200	3.40996e-07
166300	2.95317e-07
166400	2.97607e-07
166500	3.12058e-07
166600	2.9148e-07
166700	3.05794e-07
166800	3.1171e-07
166900	3.13066e-07
167000	3.29414e-07
167100	3.12244e-07
167200	2.97914e-07
167300	3.21889e-07
167400	3.1617e-07
167500	3.13806e-07
167600	3.2905e-07
167700	3.24488e-07
167800	3.15035e-07
167900	3.00339e-07
168000	3.2803e-07
168100	3.26213e-07
168200	2.82118e-07
168300	2.56855e-07
168400	2.60122e-07
168500	3.02187e-07
168600	3.07621e-07
168700	3.15426e-07
168800	3.33857e-07
168900	3.04151e-07
169000	2.77526e-07
169100	2.80508e-07
169200	3.02423e-07
169300	3.50583e-07
169400	3.68192e-07
169500	3.07498e-07
169600	3.10509e-07
169700	3.85047e-07
169800	3.51174e-07
169900	2.78748e-07
170000	3.00705e-07
170100	2.96164e-07
170200	3.00231e-07
170300	3.40924e-07
170400	3.39728e-07
170500	3.00583e-07
170600	2.64838e-07
170700	2.84444e-07
170800	3.18909e-07
170900	3.09063e-07
171000	3.25396e-07
171100	3.64666e-07
171200	3.05926e-07
171300	3.03791e-07
171400	3.40021e-07
171500	3.10943e-07
171600	3.10823e-07
171700	2.86802e-07
171800	2.86929e-07
171900	3.08152e-07
172000	3.0196e-07
172100	2.90803e-07
172200	3.11333e-07
172300	2.96275e-07
172400	2.93958e-07
172500	2.9067e-07
172600	2.90991e-07
172700	2.99993e-07
172800	3.02765e-07
172900	2.95619e-07
173000	3.01619e-07
173100	2.91732e-07
173200	2.95157e-07
173300	2.91331e-07
173400	3.04315e-07
173500	2.91838e-07
173600	2.85585e-07
173700	2.59527e-07
173800	2.76456e-07
173900	2.99616e-07
174000	2.7223e-07
174100	2.95949e-07
174200	2.81337e-07
174300	2.77377e-07
174400	2.9034e-07
174500	2.76125e-07
174600	2.62162e-07
174700	2.78246e-07
174800	2.90684e-07
174900	2.97428e-07
175000	3.25178e-07
175100	3.16344e-07
175200	3.22261e-07
175300	3.14081e-07
175400	2.74491e-07
175500	3.09737e-07
175600	3.29417e-07
175700	3.01651e-07
175800	2.70425e-07
175900	2.90556e-07
176000	3.10971e-07
176100	4.10197e-07
176200	0.000128
176300	0.000654
176400	0.000209
176500	5.06238e-07
176600	3.03029e-07
176700	2.93845e-07
176800	2.62329e-07
176900	3.15136e-07
177000	3.53154e-07
177100	2.97303e-07
177200	2.62428e-07
177300	2.90218e-07
177400	2.62483e-07
177500	2.97244e-07
177600	2.90907e-07
177700	3.01615e-07
177800	2.81882e-07
177900	2.54305e-07
178000	2.53916e-07
178100	2.49093e-07
178200	2.77639e-07
178300	3.03694e-07
178400	2.99691e-07
178500	2.86046e-07
178600	3.07791e-07
178700	2.88423e-07
178800	2.86046e-07
178900	2.78733e-07
179000	3.06087e-07
179100	2.72614e-07
179200	2.78186e-07
179300	3.12645e-07
179400	3.11028e-07
179500	3.01846e-07
179600	2.97548e-07
179700	2.75154e-07
179800	2.58888e-07
179900	2.73497e-07
180000	3.24099e-07
180100	2.88286e-07
180200	2.8783e-07
180300	2.96945e-07
180400	2.85215e-07
180500	3.00156e-07
180600	3.07146e-07
180700	2.65395e-07
180800	2.63147e-07
180900	2.76452e-07
181000	2.86991e-07
181100	2.74891e-07
181200	2.9817e-07
181300	2.87596e-07
181400	2.92162e-07
181500	2.75802e-07
181600	2.78701e-07
181700	2.89346e-07
181800	2.82752e-07
181900	2.94802e-07
182000	3.02349e-07
182100	3.01367e-07
182200	3.17815e-07
182300	2.89204e-07
182400	2.92276e-07
182500	2.83126e-07
182600	2.69952e-07
182700	2.82924e-07
182800	2.94833e-07
182900	2.86598e-07
183000	2.807e-07
183100	2.65423e-07
183200	2.88257e-07
183300	2.88811e-07
183400	2.96408e-07
183500	2.57418e-07
183600	2.94222e-07
183700	3.03297e-07
183800	2.77411e-07
183900	2.78157e-07
184000	2.55768e-07
184100	2.6984e-07
184200	2.54422e-07
184300	2.6772e-07
184400	3.1844e-07
184500	3.64468e-07
184600	3.14911e-07
184700	2.73824e-07
184800	2.81312e-07
184900	2.88905e-07
185000	2.60403e-07
185100	2.5546e-07
185200	2.62532e-07
185300	2.64461e-07
185400	2.66745e-07
185500	2.88787e-07
185600	2.99581e-07
185700	2.91168e-07
185800	3.0938e-07
185900	2.84632e-07
186000	2.82525e-07
186100	2.85025e-07
186200	2.79578e-07
186300	3.12197e-07
186400	2.86673e-07
186500	2.63923e-07
186600	2.82156e-07
186700	2.88248e-07
186800	2.68844e-07
186900	2.86999e-07
187000	2.84194e-07
187100	2.71889e-07
187200	2.83402e-07
187300	2.63602e-07
187400	2.64064e-07
187500	2.96869e-07
187600	2.80343e-07
187700	2.69364e-07
187800	2.85575e-07
187900	2.87879e-07
188000	3.03611e-07
188100	3.32703e-07
188200	3.13514e-07
188300	2.9205e-07
188400	2.76389e-07
188500	2.70786e-07
188600	2.95848e-07
188700	2.95681e-07
188800	2.59866e-07
188900	2.80915e-07
189000	2.70938e-07
189100	2.58981e-07
189200	2.42142e-07
189300	2.49802e-07
189400	2.45826e-07
189500	2.63435e-07
189600	2.74467e-07
189700	2.81717e-07
189800	2.7759e-07
189900	2.68059e-07
190000	2.82171e-07
190100	2.65496e-07
190200	2.5341e-07
190300	2.53476e-07
190400	2.60062e-07
190500	2.58005e-07
190600	2.58121e-07
190700	2.53577e-07
190800	2.61528e-07
190900	2.9144e-07
191000	2.62896e-07
191100	2.47505e-07
191200	2.54318e-07
191300	2.58074e-07
191400	2.68043e-07
191500	2.58075e-07
191600	2.67429e-07
191700	2.63349e-07
191800	2.71548e-07
191900	2.64734e-07
192000	2.7342e-07
192100	2.5777e-07
192200	2.80232e-07
192300	2.57968e-07
192400	2.52852e-07
192500	2.66819e-07
192600	3.04093e-07
192700	2.82809e-07
192800	2.80275e-07
192900	2.71873e-07
193000	2.7757e-07
193100	2.75144e-07
193200	2.69087e-07
193300	2.70925e-07
193400	2.6812e-07
193500	2.60399e-07
193600	2.98069e-07
193700	3.0514e-07
193800	2.95076e-07
193900	2.60387e-07
194000	2.50208e-07
194100	2.40969e-07
194200	2.48448e-07
194300	2.67867e-07
194400	2.93754e-07
194500	2.75959e-07
194600	2.38595e-07
194700	2.40507e-07
194800	2.77986e-07
194900	2.91948e-07
195000	2.73944e-07
195100	2.62896e-07
195200	2.69332e-07
195300	2.75984e-07
195400	2.94286e-07
195500	3.29135e-07
195600	3.42332e-07
195700	3.4178e-07
195800	0.000146
195900	0.000544
196000	0.000127
196100	2.99757e-07
196200	2.94007e-07
196300	2.79348e-07
196400	3.01332e-07
196500	2.78142e-07
196600	2.50423e-07
196700	2.55167e-07
196800	2.79533e-07
196900	2.67891e-07
197000	2.44268e-07
197100	2.45836e-07
197200	2.87528e-07
197300	3.15874e-07
197400	3.38882e-07
197500	3.15607e-07
197600	2.81992e-07
197700	2.77291e-07
197800	2.68555e-07
197900	2.49707e-07
198000	3.3018e-07
198100	3.30892e-07
198200	2.50375e-07
198300	2.33753e-07
198400	2.34437e-07
198500	2.69903e-07
198600	2.64857e-07
198700	2.62486e-07
198800	2.43829e-07
198900	2.60922e-07
199000	2.74887e-07
199100	2.93569e-07
199200	2.62347e-07
199300	2.67198e-07
199400	2.66196e-07
199500	2.52225e-07
199600	2.69439e-07
199700	2.67642e-07
[truncated: 1,002 more rows]

## Sheet: Sheet4
Fig EXT 5b
R(ohm)	Sv (V^2/Hz)
15.1	5.71653e-09
51.2	1.48871e-08
102.8	2.77614e-08
153.9	4.10859e-08
227.4	5.83884e-08
511.7	1.3259e-07
1053	2.67614e-07
1586	3.93818e-07
2171	5.61076e-07
3154	8.04361e-07

## Sheet: Sheet1
Fig EXT 5C
T(K)	Sv
5	1.10935e-08
10	2.02075e-08
20	3.83969e-08
30	5.70432e-08
40	7.45937e-08
50	9.24483e-08
60	1.12239e-07
70	1.29941e-07
100	1.85505e-07
150	2.76937e-07
200	3.69489e-07
300	5.51953e-07

## Sheet: Sheet3
Fig EXT 5d
I (A)	Sv (arb.)
-2.58973e-05	2.60011e-07
-2.33076e-05	2.69134e-07
-2.07179e-05	2.69134e-07
-1.81281e-05	2.67614e-07
-1.55384e-05	2.64572e-07
-1.29487e-05	2.60011e-07
-1.03589e-05	2.64572e-07
-7.7692e-06	2.63052e-07
-5.17947e-06	2.60011e-07
-2.58973e-06	2.66093e-07
0	2.61531e-07
2.58973e-06	2.69134e-07
5.17947e-06	2.69134e-07
7.7692e-06	2.61531e-07
1.03589e-05	2.5849e-07
1.29487e-05	2.60011e-07
1.55384e-05	2.64572e-07
1.81281e-05	2.67614e-07
2.07179e-05	2.60011e-07
2.33076e-05	2.61531e-07
2.58973e-05	2.69134e-07

## Sheet: Sheet5
Fig EXT 5e
freq (Hz)	Sv (arb.)
0	1.45385e-06
100	1.57331e-06
200	7.50438e-07
300	1.23793e-07
400	1.45319e-07
500	1.31338e-07
600	1.18718e-07
700	1.13891e-07
800	1.04418e-07
900	1.09473e-07
1000	1.10748e-07
1100	1.01587e-07
1200	1.06668e-07
1300	1.03594e-07
1400	1.00855e-07
1500	9.5388e-08
1600	9.21865e-08
1700	9.42591e-08
1800	9.69687e-08
1900	1.01729e-07
2000	1.03769e-07
2100	9.87824e-08
2200	9.37891e-08
2300	9.86032e-08
2400	9.85728e-08
2500	9.51832e-08
2600	9.19369e-08
2700	9.37059e-08
2800	9.5924e-08
2900	9.97012e-08
3000	1.01046e-07
3100	9.35942e-08
3200	9.55862e-08
3300	9.87344e-08
3400	9.33304e-08
3500	9.26058e-08
3600	9.14893e-08
3700	9.18833e-08
3800	9.77011e-08
3900	1.00998e-07
4000	8.9035e-08
4100	9.40199e-08
4200	9.29476e-08
4300	9.04223e-08
4400	9.3909e-08
4500	1.00848e-07
4600	9.59537e-08
4700	9.11424e-08
4800	9.52681e-08
4900	9.79162e-08
5000	9.50806e-08
5100	9.67149e-08
5200	9.90175e-08
5300	9.83359e-08
5400	9.91035e-08
5500	9.45808e-08
5600	9.39824e-08
5700	1.00725e-07
5800	9.3358e-08
5900	9.52258e-08
6000	9.86926e-08
6100	9.4165e-08
6200	8.80087e-08
6300	8.87625e-08
6400	9.74085e-08
6500	9.61953e-08
6600	9.77421e-08
6700	9.7768e-08
6800	9.30605e-08
6900	8.97754e-08
7000	9.0431e-08
7100	9.28689e-08
7200	8.98665e-08
7300	8.53975e-08
7400	8.85888e-08
7500	9.96333e-08
7600	9.44889e-08
7700	8.87462e-08
7800	9.46009e-08
7900	9.57203e-08
8000	9.72637e-08
8100	9.69141e-08
8200	1.02766e-07
8300	1.03877e-07
8400	1.04487e-07
8500	1.01412e-07
8600	1.01907e-07
8700	9.66811e-08
8800	8.9816e-08
8900	9.25244e-08
9000	9.25506e-08
9100	9.15727e-08
9200	8.91952e-08
9300	8.91619e-08
9400	9.01747e-08
9500	9.30943e-08
9600	9.93696e-08
9700	9.76208e-08
9800	9.31989e-08
9900	9.28682e-08
10000	9.48602e-08
10100	9.13856e-08
10200	8.73808e-08
10300	8.97087e-08
10400	8.74988e-08
10500	9.50021e-08
10600	9.71055e-08
10700	1.01747e-07
10800	1.03952e-07
10900	9.96204e-08
11000	9.42761e-08
11100	9.55249e-08
11200	8.91987e-08
11300	8.78426e-08
11400	9.30183e-08
11500	9.19274e-08
11600	1.00441e-07
11700	1.00304e-07
11800	9.82808e-08
11900	9.7158e-08
12000	9.2649e-08
12100	9.5964e-08
12200	1.03663e-07
12300	9.71326e-08
12400	9.84166e-08
12500	1.0396e-07
12600	1.08787e-07
12700	1.05123e-07
12800	1.00125e-07
12900	1.02023e-07
13000	9.89334e-08
13100	9.20884e-08
13200	9.09288e-08
13300	9.50003e-08
13400	8.81507e-08
13500	8.6195e-08
13600	9.16818e-08
13700	9.4451e-08
13800	1.00626e-07
13900	9.26807e-08
14000	8.79201e-08
14100	9.04995e-08
14200	8.98164e-08
14300	9.14624e-08
14400	9.78968e-08
14500	9.58078e-08
14600	9.23944e-08
14700	9.35423e-08
14800	8.66798e-08
14900	9.18317e-08
15000	1.06674e-07
15100	9.78596e-08
15200	9.18967e-08
15300	9.96525e-08
15400	9.80464e-08
15500	9.15441e-08
15600	8.52575e-08
15700	8.90937e-08
15800	9.39125e-08
15900	9.15306e-08
16000	8.9568e-08
16100	9.36711e-08
16200	9.32929e-08
16300	9.27732e-08
16400	8.59915e-08
16500	9.20685e-08
16600	1.01029e-07
16700	9.71056e-08
16800	9.45689e-08
16900	9.77508e-08
17000	9.39854e-08
17100	9.30455e-08
17200	9.77229e-08
17300	9.61406e-08
17400	9.25685e-08
17500	9.35872e-08
17600	8.97783e-08
17700	8.73398e-08
17800	8.66556e-08
17900	8.9613e-08
18000	9.69737e-08
18100	9.65326e-08
18200	9.79316e-08
18300	1.00668e-07
18400	9.58154e-08
18500	9.52152e-08
18600	9.44759e-08
18700	9.95083e-08
18800	9.85649e-08
18900	1.01652e-07
19000	1.00286e-07
19100	9.77084e-08
19200	9.82916e-08
19300	9.8287e-08
19400	1.00724e-07
19500	9.49776e-08
19600	9.66081e-08
19700	9.97753e-08
19800	9.1612e-08
19900	9.30358e-08
20000	1.0078e-07
20100	9.75376e-08
20200	9.09192e-08
20300	9.25319e-08
20400	9.94864e-08
20500	1.04897e-07
20600	1.00189e-07
20700	9.51703e-08
20800	9.39298e-08
20900	9.72701e-08
21000	8.85119e-08
21100	9.51653e-08
21200	9.55276e-08
21300	9.9572e-08
21400	9.28189e-08
21500	9.47137e-08
21600	1.02204e-07
21700	9.46171e-08
21800	8.86687e-08
21900	8.71894e-08
22000	8.96202e-08
22100	9.74216e-08
22200	1.0073e-07
22300	9.45318e-08
22400	9.03947e-08
22500	9.48011e-08
22600	9.15829e-08
22700	9.19083e-08
22800	8.49998e-08
22900	8.52098e-08
23000	9.29781e-08
23100	1.02682e-07
23200	1.0003e-07
23300	9.85797e-08
23400	9.84775e-08
23500	9.44847e-08
23600	9.181e-08
23700	9.34507e-08
23800	9.31848e-08
23900	9.31371e-08
24000	9.48798e-08
24100	9.47293e-08
24200	9.34865e-08
24300	9.36498e-08
24400	9.19177e-08
24500	8.99049e-08
24600	9.30523e-08
24700	9.59577e-08
24800	9.12884e-08
24900	8.47612e-08
25000	8.79655e-08
25100	9.19422e-08
25200	9.42712e-08
25300	9.29498e-08
25400	9.74456e-08
25500	9.51795e-08
25600	9.87886e-08
25700	9.83881e-08
25800	9.80323e-08
25900	9.37897e-08
26000	9.41311e-08
26100	9.65347e-08
26200	1.00467e-07
26300	9.86034e-08
26400	9.10793e-08
26500	8.83631e-08
26600	8.9566e-08
26700	8.91835e-08
26800	9.17347e-08
26900	9.78499e-08
27000	9.80327e-08
27100	9.46932e-08
27200	9.62244e-08
27300	9.32661e-08
27400	9.60785e-08
27500	9.69521e-08
27600	9.20069e-08
27700	9.07342e-08
27800	9.59413e-08
27900	9.64557e-08
28000	9.33278e-08
28100	1.00089e-07
28200	1.01795e-07
28300	9.31358e-08
28400	8.932e-08
28500	8.33684e-08
28600	8.60371e-08
28700	9.3326e-08
28800	9.31421e-08
28900	9.83051e-08
29000	9.77664e-08
29100	9.53479e-08
29200	9.69325e-08
29300	9.38111e-08
29400	9.17288e-08
29500	8.68803e-08
29600	9.08484e-08
29700	9.77882e-08
29800	9.52632e-08
29900	8.73576e-08
30000	9.18097e-08
30100	9.82216e-08
30200	1.01874e-07
30300	9.63584e-08
30400	9.19072e-08
30500	8.96026e-08
30600	9.24572e-08
30700	9.58531e-08
30800	9.39768e-08
30900	9.61888e-08
31000	9.7284e-08
31100	9.40648e-08
31200	9.18531e-08
31300	8.99783e-08
31400	9.05499e-08
31500	9.17029e-08
31600	9.2362e-08
31700	9.19783e-08
31800	9.74695e-08
31900	9.28211e-08
32000	9.55742e-08
32100	9.62712e-08
32200	9.28526e-08
32300	9.29819e-08
32400	9.49523e-08
32500	9.84474e-08
32600	9.65744e-08
32700	9.70936e-08
32800	9.64725e-08
32900	9.42349e-08
33000	9.63624e-08
33100	9.85177e-08
33200	9.40962e-08
33300	9.28253e-08
33400	9.95696e-08
33500	9.63792e-08
33600	8.78024e-08
33700	8.78153e-08
33800	9.27121e-08
33900	9.25996e-08
34000	8.89461e-08
34100	1.001e-07
34200	9.79313e-08
34300	9.48541e-08
34400	9.34303e-08
34500	8.6523e-08
34600	9.22533e-08
34700	9.34041e-08
34800	9.68812e-08
34900	9.37513e-08
35000	8.83939e-08
35100	1.00439e-07
35200	9.82356e-08
35300	9.63742e-08
35400	9.69245e-08
35500	8.82462e-08
35600	8.87154e-08
35700	8.95619e-08
35800	9.16483e-08
35900	9.09775e-08
36000	8.99765e-08
36100	8.45415e-08
36200	8.69897e-08
36300	8.8504e-08
36400	9.11257e-08
36500	9.21102e-08
36600	9.31027e-08
36700	9.23413e-08
36800	9.59379e-08
36900	9.69423e-08
37000	9.73681e-08
37100	9.8878e-08
37200	9.27509e-08
37300	8.81447e-08
37400	9.23922e-08
37500	9.64323e-08
37600	8.41378e-08
37700	9.19662e-08
37800	9.86734e-08
37900	9.53344e-08
38000	9.15888e-08
38100	9.93126e-08
38200	9.20971e-08
38300	9.04962e-08
38400	9.56386e-08
38500	9.06879e-08
38600	9.14922e-08
38700	9.21619e-08
38800	9.1812e-08
38900	9.24342e-08
39000	9.85095e-08
39100	1.02033e-07
39200	9.43956e-08
39300	9.35607e-08
39400	9.8986e-08
39500	9.82854e-08
39600	9.85537e-08
39700	9.49813e-08
39800	9.86257e-08
39900	9.76936e-08
40000	9.24691e-08
40100	8.91434e-08
40200	9.41642e-08
40300	9.03141e-08
40400	8.98874e-08
40500	8.83998e-08
40600	8.80554e-08
40700	8.97012e-08
40800	8.40585e-08
40900	8.99275e-08
41000	8.68127e-08
41100	8.82775e-08
41200	9.28836e-08
41300	9.19983e-08
41400	9.08972e-08
41500	9.20591e-08
41600	9.24977e-08
41700	8.88362e-08
41800	9.29281e-08
41900	9.51281e-08
42000	9.22852e-08
42100	8.72509e-08
42200	8.86579e-08
42300	8.87865e-08
42400	9.40014e-08
42500	9.39304e-08
42600	8.40817e-08
42700	8.85633e-08
42800	8.90908e-08
42900	9.26318e-08
43000	9.23694e-08
43100	9.39118e-08
43200	9.11292e-08
43300	1.00635e-07
43400	9.18738e-08
43500	8.61308e-08
43600	8.97119e-08
43700	8.2745e-08
43800	9.4648e-08
43900	9.70172e-08
44000	9.77601e-08
44100	9.87824e-08
44200	8.97911e-08
44300	9.44003e-08
44400	9.84616e-08
44500	9.21279e-08
44600	9.41161e-08
44700	8.38488e-08
44800	8.69011e-08
44900	8.55802e-08
45000	8.89816e-08
45100	8.85467e-08
45200	8.6162e-08
45300	9.27842e-08
45400	9.22469e-08
45500	9.07574e-08
45600	9.43592e-08
45700	9.23775e-08
45800	8.74796e-08
45900	8.82175e-08
46000	9.02129e-08
46100	9.07383e-08
46200	8.97668e-08
46300	8.95514e-08
46400	8.65544e-08
46500	8.95515e-08
46600	9.89036e-08
46700	1.0044e-07
46800	9.16493e-08
46900	9.35501e-08
47000	9.84057e-08
47100	1.00914e-07
47200	9.84519e-08
47300	9.12328e-08
47400	9.4841e-08
47500	9.8016e-08
47600	9.03432e-08
47700	8.43457e-08
47800	8.83506e-08
47900	8.91577e-08
48000	9.0025e-08
48100	8.94913e-08
48200	9.06154e-08
48300	9.30179e-08
48400	8.94131e-08
48500	9.48077e-08
48600	9.33115e-08
48700	8.75149e-08
48800	8.75394e-08
48900	8.65887e-08
49000	9.31432e-08
49100	9.01516e-08
49200	8.69884e-08
49300	9.26145e-08
49400	9.05753e-08
49500	8.44583e-08
49600	9.10676e-08
49700	8.79483e-08
49800	9.01085e-08
49900	9.12527e-08
50000	8.8953e-08
50100	9.13183e-08
50200	9.50379e-08
50300	9.7947e-08
50400	9.79782e-08
50500	9.43944e-08
50600	9.59017e-08
50700	9.83879e-08
50800	9.77045e-08
50900	9.76393e-08
51000	9.61804e-08
51100	9.12469e-08
51200	9.11788e-08
51300	1.04607e-07
51400	1.03389e-07
51500	9.4914e-08
51600	8.94015e-08
51700	9.2937e-08
51800	9.45429e-08
51900	9.16844e-08
52000	1.00304e-07
52100	9.52514e-08
52200	8.87056e-08
52300	9.14057e-08
52400	9.74071e-08
52500	1.01683e-07
52600	9.91883e-08
52700	9.71846e-08
52800	9.48709e-08
52900	9.06185e-08
53000	8.57866e-08
53100	8.861e-08
53200	9.00552e-08
53300	8.77409e-08
53400	9.15942e-08
53500	9.49941e-08
53600	8.74177e-08
53700	9.23169e-08
53800	8.90419e-08
53900	9.33995e-08
54000	9.53091e-08
54100	9.36863e-08
54200	9.38403e-08
54300	9.25008e-08
54400	8.51431e-08
54500	9.14116e-08
54600	9.64391e-08
54700	9.37157e-08
54800	9.04184e-08
54900	9.59411e-08
55000	9.00794e-08
55100	9.51614e-08
55200	9.3719e-08
55300	8.51963e-08
55400	8.75673e-08
55500	8.86844e-08
55600	9.36384e-08
55700	8.5973e-08
55800	8.41878e-08
55900	9.37797e-08
56000	8.89045e-08
56100	8.63669e-08
56200	8.83307e-08
56300	9.18752e-08
56400	9.13289e-08
56500	9.10692e-08
56600	9.11372e-08
56700	8.90921e-08
56800	8.90764e-08
56900	8.77711e-08
57000	8.506e-08
57100	8.60653e-08
57200	8.49519e-08
57300	8.2616e-08
57400	8.99075e-08
57500	8.85718e-08
57600	8.38645e-08
57700	8.57764e-08
57800	9.18532e-08
57900	9.20168e-08
58000	8.68845e-08
58100	8.16246e-08
58200	8.0005e-08
58300	8.66029e-08
58400	8.98873e-08
58500	8.96127e-08
58600	8.59614e-08
58700	8.93371e-08
58800	8.8074e-08
58900	8.72861e-08
59000	9.11221e-08
59100	8.7907e-08
59200	8.92048e-08
59300	9.082e-08
59400	9.1311e-08
59500	9.51676e-08
59600	9.54761e-08
59700	8.90082e-08
59800	9.12009e-08
59900	8.97397e-08
60000	9.27579e-08
60100	8.60651e-08
60200	8.41075e-08
60300	8.54415e-08
60400	9.27367e-08
60500	8.71124e-08
60600	9.11795e-08
60700	8.86788e-08
60800	8.95568e-08
60900	8.62031e-08
61000	8.31269e-08
61100	8.68911e-08
61200	9.10906e-08
61300	9.47985e-08
61400	9.44243e-08
61500	9.06519e-08
61600	9.19601e-08
61700	9.54106e-08
61800	9.46041e-08
61900	8.6846e-08
62000	8.88045e-08
62100	8.96721e-08
62200	8.83446e-08
62300	8.619e-08
62400	8.63061e-08
62500	8.64504e-08
62600	8.74175e-08
62700	8.55536e-08
62800	8.00153e-08
62900	8.38782e-08
63000	8.68349e-08
63100	9.09091e-08
63200	8.76449e-08
63300	8.52144e-08
63400	8.45988e-08
63500	8.50461e-08
63600	8.8826e-08
63700	9.27535e-08
63800	9.02696e-08
63900	9.12648e-08
64000	9.08411e-08
64100	9.19649e-08
64200	9.10024e-08
64300	8.74815e-08
64400	8.92392e-08
64500	9.01259e-08
64600	8.86679e-08
64700	8.76501e-08
64800	8.83779e-08
64900	8.47824e-08
65000	8.56973e-08
65100	8.6103e-08
65200	8.54392e-08
65300	9.1583e-08
65400	8.36195e-08
65500	8.07098e-08
65600	8.41389e-08
65700	9.12161e-08
65800	9.23868e-08
65900	8.94454e-08
66000	8.62336e-08
66100	9.09096e-08
66200	9.87103e-08
66300	1.00882e-07
66400	9.46921e-08
66500	9.0396e-08
66600	9.604e-08
66700	9.4064e-08
66800	9.65929e-08
66900	9.64032e-08
67000	9.4593e-08
67100	1.13448e-07
67200	1.757e-07
67300	1.98728e-07
67400	1.77471e-07
67500	1.19389e-07
67600	9.39822e-08
67700	1.08484e-07
67800	1.66986e-07
67900	2.49106e-07
68000	4.28975e-07
68100	6.5328e-07
68200	9.4871e-07
68300	8.04142e-06
68400	8.70864e-06
68500	3.93223e-06
68600	1.03247e-06
68700	4.67986e-07
68800	1.38453e-07
68900	1.35724e-07
69000	1.21493e-07
69100	1.0499e-07
69200	1.27411e-07
69300	1.30584e-07
69400	1.24325e-07
69500	1.00192e-07
69600	8.90387e-08
69700	8.31438e-08
69800	8.97652e-08
69900	8.95921e-08
70000	9.01228e-08
70100	9.58053e-08
70200	9.00987e-08
70300	8.99863e-08
70400	9.42033e-08
70500	9.30795e-08
70600	9.27333e-08
70700	9.63022e-08
70800	8.70465e-08
70900	8.3023e-08
71000	8.66987e-08
71100	8.16736e-08
71200	8.52809e-08
71300	8.90521e-08
71400	9.05254e-08
71500	8.71063e-08
71600	8.53586e-08
71700	8.54458e-08
71800	8.39596e-08
71900	8.44586e-08
72000	8.81715e-08
72100	8.2524e-08
72200	8.62992e-08
72300	8.68255e-08
72400	8.26479e-08
72500	8.61628e-08
72600	9.43565e-08
72700	8.70507e-08
72800	7.95906e-08
72900	9.03154e-08
73000	8.4716e-08
73100	8.3088e-08
73200	9.0108e-08
73300	8.28696e-08
73400	7.97064e-08
73500	8.53775e-08
73600	8.60541e-08
73700	8.56446e-08
73800	9.14594e-08
73900	9.55425e-08
74000	8.99461e-08
74100	8.97733e-08
74200	8.68602e-08
74300	8.70284e-08
74400	8.80333e-08
74500	8.69551e-08
74600	8.55114e-08
74700	8.68357e-08
74800	8.62043e-08
74900	8.66842e-08
75000	8.67066e-08
75100	8.32453e-08
75200	8.21967e-08
75300	8.33433e-08
75400	8.28075e-08
75500	8.85942e-08
75600	9.15744e-08
75700	8.26105e-08
75800	8.27493e-08
75900	7.95686e-08
76000	8.661e-08
76100	8.5694e-08
76200	8.73433e-08
76300	8.6675e-08
76400	8.60746e-08
76500	8.3867e-08
76600	8.13157e-08
76700	7.62158e-08
76800	7.77062e-08
76900	7.56992e-08
77000	8.47773e-08
77100	8.35671e-08
77200	8.05536e-08
77300	7.9476e-08
77400	8.22443e-08
77500	8.56669e-08
77600	8.09755e-08
77700	8.51869e-08
77800	8.12707e-08
77900	7.47326e-08
78000	7.73487e-08
78100	8.49741e-08
78200	8.98893e-08
78300	9.04971e-08
78400	8.50392e-08
78500	8.56639e-08
78600	8.70462e-08
78700	8.87923e-08
78800	8.01853e-08
78900	8.58429e-08
79000	9.21934e-08
79100	8.84131e-08
79200	8.29381e-08
79300	8.06697e-08
79400	8.45883e-08
79500	7.93039e-08
79600	8.26039e-08
79700	8.76518e-08
79800	8.6407e-08
79900	8.08575e-08
80000	8.43936e-08
80100	9.14714e-08
80200	8.34857e-08
80300	7.85042e-08
80400	7.70098e-08
80500	8.01708e-08
80600	8.78866e-08
80700	8.4994e-08
80800	8.5328e-08
80900	8.81617e-08
81000	8.38892e-08
81100	8.12462e-08
81200	8.06265e-08
81300	8.2487e-08
81400	8.85149e-08
81500	8.3216e-08
81600	8.16518e-08
81700	8.66972e-08
81800	8.39783e-08
81900	8.48693e-08
82000	8.6781e-08
82100	8.52632e-08
82200	7.88607e-08
82300	8.02305e-08
82400	8.2871e-08
82500	8.3789e-08
82600	8.50162e-08
82700	7.99674e-08
82800	8.38351e-08
82900	8.54984e-08
83000	8.60249e-08
83100	8.85229e-08
83200	8.00424e-08
83300	7.71671e-08
83400	8.47199e-08
83500	8.33218e-08
83600	8.28262e-08
83700	8.70711e-08
83800	8.07583e-08
83900	7.72421e-08
84000	8.23522e-08
84100	8.30825e-08
84200	8.97054e-08
84300	8.14099e-08
84400	7.8909e-08
84500	7.82691e-08
84600	7.97585e-08
84700	8.69719e-08
84800	8.55066e-08
84900	8.86183e-08
85000	8.58632e-08
85100	8.59278e-08
85200	7.84297e-08
85300	7.60971e-08
85400	8.09062e-08
85500	8.55943e-08
85600	8.50828e-08
85700	8.40756e-08
85800	8.47041e-08
85900	8.51498e-08
86000	8.32982e-08
86100	8.62913e-08
86200	8.68013e-08
86300	8.75019e-08
86400	8.29219e-08
86500	7.99001e-08
86600	8.26635e-08
86700	8.52087e-08
86800	8.75532e-08
86900	8.61911e-08
87000	8.67258e-08
87100	8.53488e-08
87200	8.3669e-08
87300	8.00062e-08
87400	7.70709e-08
87500	8.19506e-08
87600	8.90002e-08
87700	8.23334e-08
87800	7.92924e-08
87900	8.13928e-08
88000	7.99788e-08
88100	8.44101e-08
88200	8.03486e-08
88300	7.53763e-08
88400	8.30896e-08
88500	8.52577e-08
88600	8.13742e-08
88700	8.34623e-08
88800	8.24543e-08
88900	8.00673e-08
89000	8.00427e-08
89100	8.27206e-08
89200	8.29355e-08
89300	7.9023e-08
89400	7.99627e-08
89500	7.95486e-08
89600	8.38636e-08
89700	8.77829e-08
89800	8.58618e-08
89900	8.34117e-08
90000	7.9025e-08
90100	8.06356e-08
90200	8.19948e-08
90300	7.65885e-08
90400	7.90609e-08
90500	8.43883e-08
90600	7.85363e-08
90700	8.1834e-08
90800	8.19746e-08
90900	7.74622e-08
91000	7.73267e-08
91100	7.9083e-08
91200	8.42441e-08
91300	8.07723e-08
91400	7.71004e-08
91500	8.06388e-08
91600	8.10201e-08
91700	8.07936e-08
91800	8.0526e-08
91900	7.77886e-08
92000	8.19998e-08
92100	8.56361e-08
92200	8.33013e-08
92300	7.83776e-08
92400	7.43281e-08
92500	7.96937e-08
92600	7.6611e-08
92700	7.43548e-08
92800	7.47007e-08
92900	7.65183e-08
93000	7.50232e-08
93100	7.77012e-08
93200	7.56307e-08
93300	7.58632e-08
93400	7.99903e-08
93500	8.51041e-08
93600	8.26738e-08
93700	7.71065e-08
93800	7.30778e-08
93900	7.96808e-08
94000	7.66125e-08
94100	7.26693e-08
94200	7.51373e-08
94300	8.05903e-08
94400	7.8476e-08
94500	7.66704e-08
94600	7.71284e-08
94700	7.75757e-08
94800	7.45195e-08
94900	7.79284e-08
95000	7.95092e-08
95100	7.77003e-08
95200	7.56136e-08
95300	7.99577e-08
95400	7.71317e-08
95500	7.96413e-08
95600	8.17974e-08
95700	7.34332e-08
95800	7.88391e-08
95900	8.26169e-08
96000	8.10911e-08
96100	8.07385e-08
96200	7.57e-08
96300	7.43024e-08
96400	7.66539e-08
96500	7.54889e-08
96600	8.19037e-08
96700	7.92895e-08
96800	7.20812e-08
96900	7.3025e-08
97000	7.67488e-08
97100	8.0706e-08
97200	8.07292e-08
97300	7.708e-08
97400	7.62701e-08
97500	7.16433e-08
97600	7.90234e-08
97700	8.02717e-08
97800	7.54462e-08
97900	7.6953e-08
98000	7.94139e-08
98100	8.12882e-08
98200	8.07147e-08
98300	7.92123e-08
98400	8.3512e-08
98500	8.05119e-08
98600	7.92186e-08
98700	7.61556e-08
98800	7.66737e-08
98900	7.78471e-08
99000	8.40658e-08
99100	7.7872e-08
99200	7.57443e-08
99300	7.39262e-08
99400	7.63732e-08
99500	8.03134e-08
99600	7.77095e-08
99700	7.57904e-08
99800	7.59069e-08
99900	7.94948e-08
100000	7.80634e-08
100100	7.41905e-08
100200	7.27682e-08
100300	7.88914e-08
100400	8.41674e-08
100500	8.2093e-08
100600	8.26893e-08
100700	8.2825e-08
100800	8.15077e-08
100900	8.42187e-08
101000	8.1636e-08
101100	8.1111e-08
101200	8.21377e-08
101300	8.66473e-08
101400	8.52023e-08
101500	8.37077e-08
101600	7.56438e-08
101700	7.67185e-08
101800	7.6064e-08
101900	7.76893e-08
102000	7.63565e-08
102100	7.71588e-08
102200	8.02212e-08
102300	8.19621e-08
102400	7.95301e-08
102500	7.92381e-08
102600	8.01204e-08
102700	8.21637e-08
102800	8.41991e-08
102900	7.77125e-08
103000	8.19975e-08
103100	7.91153e-08
103200	7.45584e-08
103300	7.50258e-08
103400	7.33632e-08
103500	7.55302e-08
103600	7.15654e-08
103700	7.0975e-08
103800	7.57539e-08
103900	7.37163e-08
104000	7.58041e-08
104100	8.13612e-08
104200	8.10513e-08
104300	8.03531e-08
104400	7.85415e-08
104500	7.36173e-08
104600	7.44046e-08
104700	8.07511e-08
104800	7.78312e-08
104900	7.59527e-08
105000	7.35099e-08
105100	7.3738e-08
105200	8.06334e-08
105300	8.15801e-08
105400	7.50062e-08
105500	7.36727e-08
105600	7.57027e-08
105700	7.62232e-08
105800	6.98951e-08
105900	7.59623e-08
106000	7.8897e-08
106100	7.88214e-08
106200	7.98098e-08
106300	7.43629e-08
106400	7.09863e-08
106500	6.94277e-08
106600	7.34723e-08
106700	7.36755e-08
106800	7.86285e-08
106900	7.87243e-08
107000	7.67721e-08
107100	7.71e-08
107200	7.45351e-08
107300	6.89237e-08
107400	7.12918e-08
107500	7.22667e-08
107600	6.89356e-08
107700	7.14411e-08
107800	6.74235e-08
107900	7.43606e-08
108000	7.602e-08
108100	7.78402e-08
108200	7.4793e-08
108300	7.61267e-08
108400	7.31006e-08
108500	7.2129e-08
108600	7.38894e-08
108700	7.56765e-08
108800	8.01904e-08
108900	7.41341e-08
109000	7.11776e-08
109100	7.36671e-08
109200	7.00016e-08
109300	7.17758e-08
109400	7.23374e-08
109500	7.57252e-08
109600	7.7713e-08
109700	8.16975e-08
109800	8.07369e-08
109900	7.84022e-08
110000	7.11617e-08
110100	6.59644e-08
110200	7.36191e-08
110300	8.02813e-08
110400	7.42982e-08
110500	7.44713e-08
110600	7.22943e-08
110700	7.81834e-08
110800	7.64141e-08
110900	7.0427e-08
111000	6.58637e-08
111100	7.0666e-08
111200	7.40027e-08
111300	7.17529e-08
111400	7.51602e-08
111500	7.49108e-08
111600	7.20973e-08
111700	7.55121e-08
111800	8.04335e-08
111900	7.65186e-08
112000	7.60185e-08
112100	7.70529e-08
112200	7.05845e-08
112300	7.30744e-08
112400	7.29806e-08
112500	6.91313e-08
112600	7.59163e-08
112700	7.31658e-08
112800	6.72415e-08
112900	7.53968e-08
113000	7.83188e-08
113100	7.31868e-08
113200	7.3748e-08
113300	7.3436e-08
113400	6.86714e-08
113500	6.86205e-08
113600	7.32584e-08
113700	6.93069e-08
113800	7.0428e-08
113900	7.46589e-08
114000	7.54739e-08
114100	7.18755e-08
114200	7.16279e-08
114300	7.01413e-08
114400	6.93651e-08
114500	7.101e-08
114600	7.33125e-08
114700	7.6492e-08
114800	7.91651e-08
114900	7.57208e-08
115000	7.35737e-08
115100	7.02576e-08
115200	7.06175e-08
115300	7.07168e-08
115400	7.62826e-08
115500	7.58647e-08
115600	7.27304e-08
115700	7.44353e-08
115800	7.52893e-08
115900	8.16878e-08
116000	7.37285e-08
116100	7.12859e-08
116200	7.17101e-08
116300	6.88518e-08
116400	7.07951e-08
116500	7.18884e-08
116600	7.06174e-08
116700	7.31651e-08
116800	6.81288e-08
116900	7.7451e-08
117000	7.50185e-08
117100	6.89621e-08
117200	6.84079e-08
117300	6.64513e-08
117400	6.57968e-08
117500	7.02923e-08
117600	7.21196e-08
117700	7.15433e-08
117800	7.48583e-08
117900	7.65876e-08
118000	7.42653e-08
118100	7.55205e-08
118200	7.54917e-08
118300	7.33281e-08
118400	7.61318e-08
118500	7.20915e-08
118600	6.80278e-08
118700	6.86591e-08
118800	6.90463e-08
118900	7.06392e-08
119000	7.60873e-08
119100	7.12142e-08
119200	7.19775e-08
119300	6.91418e-08
119400	6.82748e-08
119500	6.59008e-08
119600	6.95698e-08
119700	7.31808e-08
119800	6.81517e-08
119900	7.3973e-08
120000	7.46691e-08
120100	7.60787e-08
120200	7.42886e-08
120300	7.14984e-08
120400	7.69157e-08
120500	7.609e-08
120600	7.17704e-08
120700	6.92957e-08
120800	7.21491e-08
120900	6.76611e-08
121000	6.70199e-08
121100	6.90265e-08
121200	6.71439e-08
121300	6.55216e-08
121400	7.03604e-08
121500	7.39209e-08
121600	7.79635e-08
121700	7.79764e-08
121800	7.14708e-08
121900	6.50918e-08
122000	6.4032e-08
122100	6.88416e-08
122200	7.04847e-08
122300	6.96042e-08
122400	7.28216e-08
122500	6.82434e-08
122600	7.45635e-08
122700	7.42111e-08
122800	6.95757e-08
122900	7.48879e-08
123000	7.57318e-08
123100	7.36526e-08
123200	6.6972e-08
123300	6.76694e-08
123400	6.77441e-08
123500	6.55508e-08
123600	6.70062e-08
123700	7.20724e-08
123800	6.93498e-08
123900	6.56427e-08
124000	6.62993e-08
124100	7.08216e-08
124200	7.26442e-08
124300	6.89804e-08
124400	7.03767e-08
124500	7.29711e-08
124600	6.97833e-08
124700	7.14302e-08
124800	7.31286e-08
124900	7.20991e-08
125000	6.98789e-08
125100	6.99311e-08
125200	6.85144e-08
125300	6.93319e-08
125400	6.7678e-08
125500	6.56003e-08
125600	7.09488e-08
125700	6.47074e-08
125800	7.10868e-08
125900	6.74121e-08
126000	6.58333e-08
126100	6.74607e-08
126200	6.68548e-08
126300	6.86215e-08
126400	6.88595e-08
126500	6.83223e-08
126600	7.06626e-08
126700	6.61394e-08
126800	6.94919e-08
126900	6.94602e-08
127000	6.9464e-08
127100	6.99145e-08
127200	6.69272e-08
127300	6.77757e-08
127400	6.49402e-08
127500	6.7882e-08
127600	7.06322e-08
127700	7.10622e-08
127800	6.4208e-08
127900	6.32604e-08
128000	6.38408e-08
128100	7.0577e-08
128200	7.18914e-08
128300	7.48428e-08
128400	6.84409e-08
128500	7.11987e-08
128600	7.19534e-08
128700	6.96092e-08
128800	6.72764e-08
128900	6.90823e-08
129000	7.04293e-08
129100	6.49672e-08
129200	6.86079e-08
129300	6.92488e-08
129400	6.81377e-08
129500	6.93112e-08
129600	6.90389e-08
129700	6.95041e-08
129800	7.45614e-08
129900	7.26925e-08
130000	6.43857e-08
130100	6.53475e-08
130200	6.77079e-08
130300	6.66023e-08
130400	6.89647e-08
130500	6.46928e-08
130600	6.52793e-08
130700	6.74707e-08
130800	6.28317e-08
130900	6.28866e-08
131000	6.53138e-08
131100	6.6497e-08
131200	6.8996e-08
131300	6.86685e-08
131400	6.84877e-08
131500	7.30762e-08
131600	7.02164e-08
131700	1.5106e-07
131800	1.59978e-07
131900	8.14242e-08
132000	7.27061e-08
132100	6.90264e-08
132200	7.09013e-08
132300	6.43516e-08
132400	6.49124e-08
132500	6.76318e-08
132600	6.81298e-08
132700	6.20467e-08
132800	5.94305e-08
132900	6.29479e-08
133000	6.80338e-08
133100	6.89918e-08
133200	6.9925e-08
133300	6.50652e-08
133400	6.36117e-08
133500	6.40158e-08
133600	6.35314e-08
133700	6.58582e-08
133800	7.30637e-08
133900	6.79858e-08
134000	6.20237e-08
134100	6.72201e-08
134200	6.87538e-08
134300	6.51521e-08
134400	6.82608e-08
134500	6.33378e-08
134600	6.16565e-08
134700	6.66217e-08
134800	6.72826e-08
134900	6.67984e-08
135000	6.4151e-08
135100	6.73617e-08
135200	6.76755e-08
135300	6.47301e-08
135400	6.54353e-08
135500	6.84451e-08
135600	6.84208e-08
135700	6.91293e-08
135800	7.11317e-08
135900	7.13109e-08
136000	7.14713e-08
136100	6.7769e-08
136200	7.12411e-08
136300	6.93664e-08
136400	6.34529e-08
136500	6.39612e-08
136600	6.8552e-08
136700	7.12431e-08
136800	6.97357e-08
136900	6.81321e-08
137000	6.5768e-08
137100	6.49528e-08
137200	6.70212e-08
137300	6.53788e-08
137400	6.42437e-08
137500	6.85896e-08
137600	6.76347e-08
137700	6.0775e-08
137800	6.02399e-08
137900	6.21185e-08
138000	6.60502e-08
138100	6.47421e-08
138200	6.31546e-08
138300	6.17142e-08
138400	5.90132e-08
138500	5.98661e-08
138600	5.93579e-08
138700	6.38829e-08
138800	6.57095e-08
138900	6.59243e-08
139000	6.39684e-08
139100	6.4991e-08
139200	6.13298e-08
139300	6.23224e-08
139400	6.02811e-08
139500	6.04094e-08
139600	6.38092e-08
139700	6.55489e-08
139800	6.96418e-08
139900	6.75948e-08
140000	6.60655e-08
140100	6.71774e-08
140200	7.01101e-08
140300	7.36442e-08
140400	7.48226e-08
140500	6.73126e-08
140600	6.27019e-08
140700	6.18576e-08
140800	6.47919e-08
140900	6.29748e-08
141000	6.37343e-08
141100	6.26302e-08
141200	5.80948e-08
141300	5.66799e-08
141400	5.96646e-08
141500	6.39578e-08
141600	6.18342e-08
141700	6.82433e-08
141800	6.67051e-08
141900	6.5787e-08
142000	6.24945e-08
142100	6.22462e-08
142200	6.38087e-08
142300	6.73048e-08
142400	5.8921e-08
142500	5.67706e-08
142600	6.26078e-08
142700	6.72417e-08
142800	6.63713e-08
142900	6.29004e-08
143000	5.99377e-08
143100	6.31419e-08
143200	6.34755e-08
143300	6.26504e-08
143400	6.68655e-08
143500	6.53598e-08
143600	6.37998e-08
143700	6.72711e-08
143800	6.74553e-08
143900	6.03172e-08
144000	5.62963e-08
144100	6.01129e-08
144200	6.08922e-08
144300	6.55033e-08
144400	6.37893e-08
144500	6.33813e-08
144600	6.58507e-08
144700	6.75419e-08
144800	6.6766e-08
144900	6.10275e-08
145000	6.09252e-08
145100	6.27772e-08
145200	6.20345e-08
145300	6.19483e-08
145400	6.36224e-08
145500	6.57071e-08
145600	6.74134e-08
145700	6.61981e-08
145800	6.21707e-08
145900	5.93524e-08
146000	6.08295e-08
146100	6.22342e-08
146200	6.36203e-08
146300	6.04011e-08
146400	5.82525e-08
146500	6.44643e-08
146600	6.7055e-08
146700	6.36243e-08
146800	6.39059e-08
146900	6.07573e-08
147000	5.71602e-08
147100	6.24107e-08
147200	6.14259e-08
147300	6.21046e-08
147400	6.12463e-08
147500	6.50805e-08
147600	6.54612e-08
147700	6.55024e-08
147800	6.61898e-08
147900	6.18959e-08
148000	5.8538e-08
148100	6.16498e-08
148200	6.01951e-08
148300	5.9772e-08
148400	6.07347e-08
148500	5.77284e-08
148600	5.93159e-08
148700	6.00543e-08
148800	6.26548e-08
148900	6.10918e-08
149000	6.02737e-08
149100	6.06757e-08
149200	6.2589e-08
149300	6.04607e-08
149400	6.16508e-08
149500	5.87114e-08
149600	6.01166e-08
149700	6.30718e-08
149800	6.43417e-08
149900	6.19184e-08
150000	6.43932e-08
150100	6.2966e-08
150200	6.31029e-08
150300	6.0514e-08
150400	5.98062e-08
150500	6.05288e-08
150600	6.35309e-08
150700	6.28993e-08
150800	6.10935e-08
150900	5.76913e-08
151000	5.5651e-08
151100	5.78971e-08
151200	6.23291e-08
151300	6.10585e-08
151400	5.95599e-08
151500	5.84935e-08
151600	5.84426e-08
151700	6.03748e-08
151800	6.12511e-08
151900	6.51189e-08
152000	6.62483e-08
152100	6.34741e-08
152200	6.50443e-08
152300	6.17932e-08
152400	6.32253e-08
152500	6.0884e-08
152600	5.93069e-08
152700	6.10518e-08
152800	6.35419e-08
152900	6.6344e-08
153000	5.95153e-08
153100	5.7308e-08
153200	5.90384e-08
153300	5.65765e-08
153400	5.67444e-08
153500	6.06355e-08
153600	6.17028e-08
153700	6.39462e-08
153800	6.09494e-08
153900	5.85887e-08
154000	6.27184e-08
154100	5.90742e-08
154200	6.1815e-08
154300	6.17155e-08
154400	5.83768e-08
154500	5.86356e-08
154600	6.04283e-08
154700	6.22268e-08
154800	6.11505e-08
154900	5.77107e-08
155000	5.77637e-08
155100	5.79181e-08
155200	5.57828e-08
155300	5.71412e-08
155400	5.99945e-08
155500	5.98166e-08
155600	6.46506e-08
155700	6.23002e-08
155800	6.05821e-08
155900	6.09923e-08
156000	5.86361e-08
156100	5.82152e-08
156200	6.26823e-08
156300	6.39912e-08
156400	5.99861e-08
156500	5.85125e-08
156600	6.38463e-08
156700	6.58674e-08
156800	5.91718e-08
156900	5.72518e-08
157000	5.60172e-08
157100	5.68724e-08
157200	5.43311e-08
157300	5.43111e-08
157400	5.73344e-08
157500	6.1549e-08
157600	6.68166e-08
157700	6.177e-08
157800	6.05319e-08
157900	5.72844e-08
158000	6.07605e-08
158100	6.04687e-08
158200	5.93011e-08
158300	6.20602e-08
158400	5.97982e-08
158500	6.01389e-08
158600	5.68464e-08
158700	5.52964e-08
158800	6.24453e-08
158900	6.13726e-08
159000	5.93105e-08
159100	6.14483e-08
159200	6.08618e-08
159300	6.26053e-08
159400	6.10654e-08
159500	6.05096e-08
159600	5.9463e-08
159700	5.91113e-08
159800	6.06829e-08
159900	6.11125e-08
160000	5.96709e-08
160100	5.89537e-08
160200	5.67291e-08
160300	5.738e-08
160400	5.97149e-08
160500	5.89231e-08
160600	5.69227e-08
160700	5.98316e-08
160800	5.88485e-08
160900	5.74555e-08
161000	5.68498e-08
161100	5.90512e-08
161200	5.982e-08
161300	6.17929e-08
161400	5.98674e-08
161500	6.16223e-08
161600	5.75073e-08
161700	5.52135e-08
161800	5.79297e-08
161900	6.19823e-08
162000	5.71453e-08
162100	5.80438e-08
162200	5.97797e-08
162300	6.05899e-08
162400	5.62138e-08
162500	5.54789e-08
162600	5.84368e-08
162700	5.5527e-08
162800	5.54568e-08
162900	5.50109e-08
163000	5.91658e-08
163100	5.85059e-08
163200	5.43701e-08
163300	5.79931e-08
163400	5.93652e-08
163500	5.98068e-08
163600	5.90467e-08
163700	5.95468e-08
163800	6.19798e-08
163900	5.66868e-08
164000	5.57381e-08
164100	5.70395e-08
164200	5.48993e-08
164300	6.37635e-08
164400	6.21088e-08
164500	5.84798e-08
164600	5.90359e-08
164700	5.97744e-08
164800	5.6653e-08
164900	5.20478e-08
165000	5.39607e-08
165100	5.52656e-08
165200	5.96686e-08
165300	6.22532e-08
165400	5.90846e-08
165500	5.81925e-08
165600	5.4992e-08
165700	5.9204e-08
165800	5.7328e-08
165900	5.29386e-08
166000	5.33575e-08
166100	5.45023e-08
166200	5.40597e-08
166300	5.7122e-08
166400	6.25976e-08
166500	5.66564e-08
166600	5.64675e-08
166700	5.33134e-08
166800	5.73492e-08
166900	5.50896e-08
167000	5.32384e-08
167100	5.24263e-08
167200	5.22503e-08
167300	4.89701e-08
167400	5.34381e-08
167500	5.79711e-08
167600	5.70881e-08
167700	5.47118e-08
167800	5.79984e-08
167900	5.64253e-08
168000	5.20271e-08
168100	5.10766e-08
168200	5.17959e-08
168300	5.51978e-08
168400	5.64314e-08
168500	5.72145e-08
168600	5.43414e-08
168700	5.21708e-08
168800	5.43116e-08
168900	5.58242e-08
169000	5.55555e-08
169100	5.37767e-08
169200	5.44513e-08
169300	5.02656e-08
169400	4.86005e-08
169500	5.36818e-08
169600	5.74371e-08
169700	5.25437e-08
169800	5.40964e-08
169900	6.12664e-08
170000	5.85024e-08
170100	5.53284e-08
170200	5.54666e-08
170300	5.61359e-08
170400	5.44103e-08
170500	5.70626e-08
170600	5.64954e-08
170700	5.52171e-08
170800	5.5713e-08
170900	5.53877e-08
171000	5.57937e-08
171100	5.78278e-08
171200	5.94627e-08
171300	5.87371e-08
171400	5.19166e-08
171500	5.38307e-08
171600	5.94855e-08
171700	5.47407e-08
171800	5.53935e-08
171900	5.64845e-08
172000	5.05525e-08
172100	5.40032e-08
172200	5.68071e-08
172300	5.52271e-08
172400	5.22273e-08
172500	5.08465e-08
172600	5.52223e-08
172700	5.62934e-08
172800	5.57566e-08
172900	5.25752e-08
173000	5.2913e-08
173100	5.69413e-08
173200	5.92515e-08
173300	5.67038e-08
173400	4.97101e-08
173500	5.04848e-08
173600	5.42419e-08
173700	5.46395e-08
173800	5.46697e-08
173900	5.32014e-08
174000	5.47482e-08
174100	5.06492e-08
174200	4.88929e-08
174300	5.10507e-08
174400	5.36199e-08
174500	5.35076e-08
174600	5.38678e-08
174700	5.61212e-08
174800	5.85498e-08
174900	5.57946e-08
175000	5.81159e-08
175100	5.36943e-08
175200	5.08416e-08
175300	5.50015e-08
175400	5.70872e-08
175500	5.62406e-08
175600	5.46216e-08
175700	5.54966e-08
175800	5.40813e-08
175900	5.29886e-08
176000	5.58122e-08
176100	5.49745e-08
176200	5.10837e-08
176300	4.99588e-08
176400	5.07298e-08
176500	5.5316e-08
176600	5.58713e-08
176700	5.56082e-08
176800	5.04878e-08
176900	5.30431e-08
177000	5.66496e-08
177100	5.32147e-08
177200	5.32943e-08
177300	5.53952e-08
177400	5.25626e-08
177500	5.79102e-08
177600	5.70683e-08
177700	5.60584e-08
177800	5.54301e-08
177900	5.05198e-08
178000	5.34185e-08
178100	5.7516e-08
178200	5.63843e-08
178300	5.67029e-08
178400	6.14428e-08
178500	5.93826e-08
178600	5.65017e-08
178700	5.5132e-08
178800	5.6602e-08
178900	5.20731e-08
179000	5.09089e-08
179100	5.23754e-08
179200	5.12184e-08
179300	4.76385e-08
179400	5.07627e-08
179500	5.21456e-08
179600	5.26817e-08
179700	5.28709e-08
179800	5.62577e-08
179900	5.1107e-08
180000	4.83751e-08
180100	5.39155e-08
180200	5.31333e-08
180300	5.27245e-08
180400	5.18005e-08
180500	5.75855e-08
180600	5.23883e-08
180700	5.59172e-08
180800	5.87961e-08
180900	5.45952e-08
181000	5.35148e-08
181100	5.26151e-08
181200	5.34364e-08
181300	5.54197e-08
181400	5.37611e-08
181500	4.83388e-08
181600	5.35565e-08
181700	5.45622e-08
181800	5.4095e-08
181900	5.31319e-08
182000	5.01629e-08
182100	5.03082e-08
182200	5.11269e-08
182300	5.19264e-08
182400	5.49144e-08
182500	5.49553e-08
182600	5.48959e-08
182700	5.52439e-08
182800	5.30744e-08
182900	5.21232e-08
183000	5.07121e-08
183100	5.03613e-08
183200	4.98288e-08
183300	5.01356e-08
183400	5.30618e-08
183500	5.03845e-08
183600	5.28126e-08
183700	5.27698e-08
183800	5.35564e-08
183900	5.16148e-08
184000	5.39681e-08
184100	4.98545e-08
184200	5.05139e-08
184300	4.77488e-08
184400	5.20155e-08
184500	4.79941e-08
184600	4.7313e-08
184700	5.1668e-08
184800	5.10546e-08
184900	5.45746e-08
185000	5.2619e-08
185100	4.97099e-08
185200	5.33986e-08
185300	5.23472e-08
185400	5.0933e-08
185500	5.24707e-08
185600	5.14756e-08
185700	5.23205e-08
185800	4.91567e-08
185900	5.0025e-08
186000	5.49864e-08
186100	5.73421e-08
186200	5.42806e-08
186300	5.15398e-08
186400	5.10127e-08
186500	5.39212e-08
186600	5.21138e-08
186700	5.01038e-08
186800	4.89152e-08
186900	4.84338e-08
187000	4.84475e-08
187100	5.06064e-08
187200	4.95395e-08
187300	4.78063e-08
187400	5.44824e-08
187500	5.42015e-08
187600	5.01957e-08
187700	5.11937e-08
187800	5.15204e-08
187900	5.06268e-08
188000	5.25248e-08
188100	5.18547e-08
188200	4.89741e-08
188300	5.19572e-08
188400	5.22096e-08
188500	5.20185e-08
188600	5.37071e-08
188700	5.53129e-08
188800	5.22616e-08
188900	5.09667e-08
189000	4.70913e-08
189100	4.91027e-08
189200	5.1253e-08
189300	5.08961e-08
189400	5.23855e-08
189500	4.90446e-08
189600	5.03517e-08
189700	5.26055e-08
189800	5.33915e-08
189900	5.24273e-08
190000	4.99121e-08
190100	5.13014e-08
190200	4.84119e-08
190300	4.9308e-08
190400	5.0597e-08
190500	5.28168e-08
190600	5.21956e-08
190700	5.06307e-08
190800	5.22098e-08
190900	5.28857e-08
191000	4.69928e-08
191100	4.73084e-08
191200	4.9428e-08
191300	4.73343e-08
191400	4.92076e-08
191500	5.26632e-08
191600	5.12133e-08
191700	5.17172e-08
191800	4.82755e-08
191900	4.75705e-08
192000	4.86148e-08
192100	4.97113e-08
192200	5.32618e-08
192300	5.34584e-08
192400	4.73863e-08
192500	4.63678e-08
192600	4.57468e-08
192700	4.65394e-08
192800	4.72018e-08
192900	5.08419e-08
193000	4.73928e-08
193100	5.22932e-08
193200	4.92248e-08
193300	4.49725e-08
193400	4.74327e-08
193500	4.92919e-08
193600	4.86651e-08
193700	5.01206e-08
193800	5.13594e-08
193900	5.01637e-08
194000	5.47364e-08
194100	4.98159e-08
194200	4.8051e-08
194300	4.81878e-08
194400	4.87669e-08
194500	5.15341e-08
194600	4.98124e-08
194700	4.78786e-08
194800	5.30331e-08
194900	5.15429e-08
195000	4.89964e-08
195100	5.13406e-08
195200	4.9137e-08
195300	4.8036e-08
195400	4.82744e-08
195500	4.8643e-08
195600	5.37223e-08
195700	5.08049e-08
195800	4.48771e-08
195900	5.04422e-08
196000	5.17381e-08
196100	5.30617e-08
196200	5.2729e-08
196300	5.08109e-08
196400	4.79221e-08
196500	4.99322e-08
196600	5.04202e-08
196700	4.97778e-08
196800	4.8324e-08
196900	4.63482e-08
197000	4.95722e-08
197100	4.87483e-08
197200	4.67751e-08
197300	4.72233e-08
197400	4.76417e-08
197500	4.84929e-08
197600	5.13659e-08
197700	4.91088e-08
197800	4.97447e-08
197900	4.88095e-08
198000	4.69064e-08
198100	4.92924e-08
198200	4.89338e-08
198300	4.93985e-08
198400	4.73401e-08
198500	4.53783e-08
198600	4.73976e-08
198700	4.61536e-08
198800	4.86393e-08
198900	4.71189e-08
199000	4.84441e-08
199100	5.07227e-08
199200	4.9606e-08
199300	5.17008e-08
199400	4.80162e-08
199500	4.51677e-08
199600	4.76357e-08
199700	4.78882e-08
[truncated: 1,002 more rows]

## Sheet: Sheet6
Fig EXT 5f
freq (Hz)	Sv (arb.)
0	9.558e-07
100	1.23735e-06
200	7.17408e-07
300	1.42813e-07
400	1.61819e-07
500	1.46732e-07
600	1.3583e-07
700	1.39816e-07
800	1.20103e-07
900	1.08387e-07
1000	1.11086e-07
1100	1.15943e-07
1200	1.11602e-07
1300	1.12986e-07
1400	1.15695e-07
1500	1.03184e-07
1600	1.08072e-07
1700	1.18452e-07
1800	1.14796e-07
1900	1.07404e-07
2000	1.03909e-07
2100	1.1652e-07
2200	1.08293e-07
2300	1.08302e-07
2400	1.08419e-07
2500	1.06172e-07
2600	1.01865e-07
2700	9.71902e-08
2800	9.42801e-08
2900	1.0026e-07
3000	1.04718e-07
3100	1.07988e-07
3200	1.05242e-07
3300	9.80158e-08
3400	9.97842e-08
3500	1.03179e-07
3600	1.11036e-07
3700	1.05923e-07
3800	9.49795e-08
3900	9.66847e-08
4000	1.06248e-07
4100	1.06995e-07
4200	1.00029e-07
4300	1.02316e-07
4400	1.04564e-07
4500	1.09665e-07
4600	1.02968e-07
4700	1.04805e-07
4800	1.05702e-07
4900	1.01952e-07
5000	1.03624e-07
5100	1.04784e-07
5200	9.85825e-08
5300	1.07935e-07
5400	1.02178e-07
5500	1.02778e-07
5600	9.78596e-08
5700	8.94909e-08
5800	9.80545e-08
5900	1.00743e-07
6000	1.05181e-07
6100	1.05887e-07
6200	1.02738e-07
6300	9.84601e-08
6400	9.71149e-08
6500	9.57907e-08
6600	1.00928e-07
6700	9.68756e-08
6800	9.15365e-08
6900	9.2859e-08
7000	9.81783e-08
7100	9.82676e-08
7200	9.90023e-08
7300	1.03464e-07
7400	1.06318e-07
7500	1.02296e-07
7600	9.65332e-08
7700	9.556e-08
7800	1.01843e-07
7900	9.69796e-08
8000	9.36535e-08
8100	9.87743e-08
8200	1.0255e-07
8300	1.04715e-07
8400	1.01125e-07
8500	9.86365e-08
8600	1.03123e-07
8700	1.00636e-07
8800	9.53387e-08
8900	9.55788e-08
9000	9.04929e-08
9100	9.48981e-08
9200	1.01358e-07
9300	1.07667e-07
9400	9.87212e-08
9500	1.04862e-07
9600	1.04068e-07
9700	9.43229e-08
9800	9.2783e-08
9900	9.95017e-08
10000	1.03739e-07
10100	1.02479e-07
10200	1.0036e-07
10300	1.0113e-07
10400	1.0124e-07
10500	9.68998e-08
10600	1.01976e-07
10700	1.00018e-07
10800	1.0311e-07
10900	1.02647e-07
11000	9.86995e-08
11100	9.81112e-08
11200	9.31835e-08
11300	9.2351e-08
11400	9.89486e-08
11500	9.52318e-08
11600	9.50796e-08
11700	9.68193e-08
11800	9.28549e-08
11900	9.04471e-08
12000	9.76759e-08
12100	1.0315e-07
12200	1.03832e-07
12300	1.02395e-07
12400	1.04381e-07
12500	1.0132e-07
12600	1.04369e-07
12700	1.04434e-07
12800	1.04104e-07
12900	9.71025e-08
13000	9.76166e-08
13100	9.66787e-08
13200	8.94432e-08
13300	9.96146e-08
13400	1.05495e-07
13500	9.63711e-08
13600	9.58542e-08
13700	1.04613e-07
13800	1.02409e-07
13900	9.70187e-08
14000	1.0301e-07
14100	9.91161e-08
14200	9.81984e-08
14300	9.9894e-08
14400	9.8677e-08
14500	1.02397e-07
14600	9.93469e-08
14700	9.59726e-08
14800	1.00942e-07
14900	9.98444e-08
15000	9.92513e-08
15100	1.03602e-07
15200	1.01239e-07
15300	9.97888e-08
15400	9.71707e-08
15500	9.59505e-08
15600	9.62404e-08
15700	9.41493e-08
15800	9.3933e-08
15900	9.60427e-08
16000	9.1212e-08
16100	9.80987e-08
16200	9.91459e-08
16300	9.75727e-08
16400	9.62459e-08
16500	9.42579e-08
16600	9.53496e-08
16700	1.01731e-07
16800	1.07154e-07
16900	9.82184e-08
17000	9.67167e-08
17100	9.85063e-08
17200	9.56372e-08
17300	9.58724e-08
17400	9.95347e-08
17500	9.43226e-08
17600	9.49594e-08
17700	9.7523e-08
17800	9.6008e-08
17900	9.83337e-08
18000	1.01075e-07
18100	1.0309e-07
18200	1.0274e-07
18300	9.94064e-08
18400	1.00612e-07
18500	1.05037e-07
18600	1.03816e-07
18700	9.71223e-08
18800	9.77252e-08
18900	9.91484e-08
19000	9.9196e-08
19100	9.69355e-08
19200	9.85526e-08
19300	9.74283e-08
19400	9.21912e-08
19500	9.90385e-08
19600	9.99683e-08
19700	1.00099e-07
19800	9.97711e-08
19900	9.5284e-08
20000	9.59739e-08
20100	9.9498e-08
20200	9.7608e-08
20300	9.44781e-08
20400	9.81062e-08
20500	9.59569e-08
20600	1.03675e-07
20700	1.00751e-07
20800	9.73887e-08
20900	1.00728e-07
21000	1.03473e-07
21100	9.79498e-08
21200	1.00624e-07
21300	9.68418e-08
21400	9.74346e-08
21500	9.55273e-08
21600	9.8935e-08
21700	1.01356e-07
21800	1.02644e-07
21900	9.76018e-08
22000	9.9724e-08
22100	9.22502e-08
22200	9.10824e-08
22300	9.92626e-08
22400	9.75491e-08
22500	9.2692e-08
22600	9.41391e-08
22700	9.93767e-08
22800	1.00222e-07
22900	9.46565e-08
23000	9.87168e-08
23100	9.6258e-08
23200	9.8738e-08
23300	9.52067e-08
23400	9.37595e-08
23500	9.63304e-08
23600	9.61711e-08
23700	9.64829e-08
23800	9.89443e-08
23900	9.16047e-08
24000	9.69798e-08
24100	9.08438e-08
24200	9.20025e-08
24300	1.05587e-07
24400	1.03664e-07
24500	9.22848e-08
24600	9.21132e-08
24700	9.16777e-08
24800	9.18172e-08
24900	1.01357e-07
25000	9.68628e-08
25100	9.88342e-08
25200	1.05995e-07
25300	9.93679e-08
25400	9.6438e-08
25500	9.84371e-08
25600	9.83331e-08
25700	9.33811e-08
25800	9.38667e-08
25900	9.91197e-08
26000	9.54072e-08
26100	9.7709e-08
26200	9.74816e-08
26300	1.02854e-07
26400	1.02281e-07
26500	1.00818e-07
26600	9.58884e-08
26700	9.411e-08
26800	1.02174e-07
26900	9.82703e-08
27000	1.01752e-07
27100	9.92924e-08
27200	9.91173e-08
27300	9.65776e-08
27400	9.32328e-08
27500	1.01214e-07
27600	1.00035e-07
27700	9.42251e-08
27800	9.23212e-08
27900	9.67516e-08
28000	9.09861e-08
28100	9.39979e-08
28200	1.02399e-07
28300	1.04994e-07
28400	1.07039e-07
28500	1.04629e-07
28600	1.02409e-07
28700	1.03707e-07
28800	9.79272e-08
28900	9.25855e-08
29000	9.55457e-08
29100	1.02336e-07
29200	9.60183e-08
29300	9.79208e-08
29400	9.9706e-08
29500	1.00627e-07
29600	9.93165e-08
29700	9.47212e-08
29800	9.79461e-08
29900	9.00545e-08
30000	9.79912e-08
30100	1.03205e-07
30200	9.96892e-08
30300	9.90245e-08
30400	9.8053e-08
30500	1.02241e-07
30600	9.78023e-08
30700	1.01298e-07
30800	9.86573e-08
30900	9.2626e-08
31000	9.34127e-08
31100	9.6391e-08
31200	9.76087e-08
31300	1.00931e-07
31400	1.02489e-07
31500	1.02801e-07
31600	9.67349e-08
31700	9.56204e-08
31800	9.60526e-08
31900	1.0096e-07
32000	9.97719e-08
32100	9.974e-08
32200	9.60755e-08
32300	9.65625e-08
32400	1.04054e-07
32500	1.01193e-07
32600	1.02801e-07
32700	1.08464e-07
32800	1.0165e-07
32900	9.63772e-08
33000	9.96567e-08
33100	1.02076e-07
33200	9.90401e-08
33300	1.04983e-07
33400	9.92701e-08
33500	9.28899e-08
33600	9.56103e-08
33700	9.34969e-08
33800	9.64128e-08
33900	1.05168e-07
34000	9.89894e-08
34100	9.42731e-08
34200	9.36699e-08
34300	9.47015e-08
34400	9.51868e-08
34500	1.02334e-07
34600	1.00638e-07
34700	9.74072e-08
34800	9.49131e-08
34900	1.02931e-07
35000	9.30573e-08
35100	9.13538e-08
35200	9.25285e-08
35300	9.19431e-08
35400	9.69868e-08
35500	1.01534e-07
35600	9.5759e-08
35700	9.51847e-08
35800	9.22448e-08
35900	9.53444e-08
36000	9.47956e-08
36100	9.60291e-08
36200	9.932e-08
36300	9.67592e-08
36400	9.46287e-08
36500	9.75516e-08
36600	9.61023e-08
36700	9.81005e-08
36800	9.608e-08
36900	9.57674e-08
37000	9.83606e-08
37100	1.01419e-07
37200	9.54766e-08
37300	9.33421e-08
37400	9.91591e-08
37500	9.6269e-08
37600	9.39249e-08
37700	9.54593e-08
37800	9.17531e-08
37900	9.69647e-08
38000	9.6553e-08
38100	9.66534e-08
38200	9.18714e-08
38300	9.6653e-08
38400	9.91078e-08
38500	9.98866e-08
38600	1.04342e-07
38700	1.01024e-07
38800	9.23843e-08
38900	9.15329e-08
39000	9.64126e-08
39100	9.91372e-08
39200	9.5238e-08
39300	9.95165e-08
39400	9.54851e-08
39500	9.70516e-08
39600	9.74804e-08
39700	8.97383e-08
39800	9.30115e-08
39900	9.61867e-08
40000	9.44824e-08
40100	9.18429e-08
40200	9.67427e-08
40300	1.03386e-07
40400	9.84784e-08
40500	8.9357e-08
40600	9.07987e-08
40700	9.65343e-08
40800	9.698e-08
40900	1.01082e-07
41000	1.01155e-07
41100	9.9301e-08
41200	9.66787e-08
41300	9.41697e-08
41400	9.64531e-08
41500	1.00401e-07
41600	9.93931e-08
41700	1.01756e-07
41800	1.01595e-07
41900	1.02042e-07
42000	1.01417e-07
42100	1.06175e-07
42200	1.00451e-07
42300	9.38105e-08
42400	9.50399e-08
42500	9.73438e-08
42600	9.36988e-08
42700	9.67438e-08
42800	1.00825e-07
42900	9.60704e-08
43000	9.19236e-08
43100	9.28413e-08
43200	9.59376e-08
43300	9.37043e-08
43400	9.51295e-08
43500	9.47785e-08
43600	9.85737e-08
43700	9.74381e-08
43800	9.8816e-08
43900	9.88044e-08
44000	9.72365e-08
44100	9.95342e-08
44200	1.01111e-07
44300	9.65527e-08
44400	9.48089e-08
44500	9.57284e-08
44600	9.75634e-08
44700	9.57311e-08
44800	9.18817e-08
44900	9.14101e-08
45000	1.00936e-07
45100	9.65205e-08
45200	9.41353e-08
45300	9.56485e-08
45400	9.80039e-08
45500	9.84196e-08
45600	1.03125e-07
45700	1.00396e-07
45800	8.97585e-08
45900	9.04646e-08
46000	9.87618e-08
46100	9.86381e-08
46200	8.92386e-08
46300	9.2395e-08
46400	9.52669e-08
46500	8.6835e-08
46600	9.21175e-08
46700	9.33055e-08
46800	9.50274e-08
46900	9.56363e-08
47000	9.60032e-08
47100	9.35981e-08
47200	9.92471e-08
47300	9.8822e-08
47400	8.91648e-08
47500	9.32124e-08
47600	9.63409e-08
47700	9.69348e-08
47800	9.48441e-08
47900	9.93994e-08
48000	9.86326e-08
48100	8.93972e-08
48200	8.23243e-08
48300	8.60978e-08
48400	9.23568e-08
48500	9.81028e-08
48600	9.58653e-08
48700	9.81418e-08
48800	1.07261e-07
48900	1.05558e-07
49000	9.15783e-08
49100	9.32997e-08
49200	9.73449e-08
49300	1.00042e-07
49400	9.82786e-08
49500	9.48237e-08
49600	9.8523e-08
49700	9.90967e-08
49800	9.45595e-08
49900	9.30169e-08
50000	8.94149e-08
50100	8.93938e-08
50200	8.90546e-08
50300	9.41213e-08
50400	9.47958e-08
50500	9.71457e-08
50600	9.627e-08
50700	9.73949e-08
50800	9.92463e-08
50900	1.03671e-07
51000	1.06417e-07
51100	1.12287e-07
51200	1.01124e-07
51300	1.00647e-07
51400	9.71239e-08
51500	9.75306e-08
51600	9.25308e-08
51700	9.02901e-08
51800	9.58683e-08
51900	1.04526e-07
52000	1.01277e-07
52100	9.57606e-08
52200	9.6618e-08
52300	9.4635e-08
52400	9.25247e-08
52500	9.80515e-08
52600	9.76537e-08
52700	9.33922e-08
52800	9.3739e-08
52900	1.01152e-07
53000	9.36833e-08
53100	9.35203e-08
53200	9.3358e-08
53300	9.43977e-08
53400	9.52334e-08
53500	1.01368e-07
53600	9.73754e-08
53700	9.42416e-08
53800	9.70012e-08
53900	8.7263e-08
54000	8.94671e-08
54100	9.20426e-08
54200	9.09963e-08
54300	9.50185e-08
54400	9.54557e-08
54500	9.49406e-08
54600	9.35946e-08
54700	9.4321e-08
54800	9.38059e-08
54900	9.19964e-08
55000	9.1612e-08
55100	9.51952e-08
55200	9.63208e-08
55300	8.92836e-08
55400	8.93739e-08
55500	9.14556e-08
55600	9.43527e-08
55700	9.56216e-08
55800	9.01429e-08
55900	8.75253e-08
56000	9.04346e-08
56100	9.12085e-08
56200	9.33078e-08
56300	9.84827e-08
56400	1.0118e-07
56500	9.68165e-08
56600	9.25873e-08
56700	9.23652e-08
56800	9.13272e-08
56900	9.13809e-08
57000	9.2918e-08
57100	9.2305e-08
57200	9.61361e-08
57300	1.03281e-07
57400	1.03602e-07
57500	9.20826e-08
57600	9.05774e-08
57700	9.13507e-08
57800	8.81716e-08
57900	8.81816e-08
58000	9.25696e-08
58100	9.24111e-08
58200	9.19186e-08
58300	9.71789e-08
58400	9.72674e-08
58500	9.57576e-08
58600	9.1081e-08
58700	8.74129e-08
58800	8.99975e-08
58900	9.14234e-08
59000	9.78172e-08
59100	9.79161e-08
59200	9.45068e-08
59300	9.30135e-08
59400	8.8697e-08
59500	8.75725e-08
59600	8.90615e-08
59700	9.75834e-08
59800	9.65599e-08
59900	9.34521e-08
60000	9.78497e-08
60100	9.9723e-08
60200	9.78015e-08
60300	8.64939e-08
60400	9.71394e-08
60500	8.97621e-08
60600	9.45422e-08
60700	9.92138e-08
60800	9.23939e-08
60900	8.80239e-08
61000	8.84145e-08
61100	8.60843e-08
61200	8.9072e-08
61300	8.9721e-08
61400	9.77775e-08
61500	9.4248e-08
61600	9.70244e-08
61700	9.29609e-08
61800	8.709e-08
61900	9.48646e-08
62000	9.01221e-08
62100	9.05794e-08
62200	9.06724e-08
62300	9.21066e-08
62400	8.55563e-08
62500	8.94524e-08
62600	9.19147e-08
62700	8.71666e-08
62800	8.79398e-08
62900	9.25678e-08
63000	9.52876e-08
63100	8.8649e-08
63200	8.71619e-08
63300	8.69478e-08
63400	9.17709e-08
63500	9.39302e-08
63600	9.33712e-08
63700	9.56439e-08
63800	9.4761e-08
63900	9.58452e-08
64000	8.75194e-08
64100	8.8584e-08
64200	9.54797e-08
64300	8.93171e-08
64400	9.70227e-08
64500	1.01227e-07
64600	9.36861e-08
64700	9.14378e-08
64800	8.78351e-08
64900	8.20322e-08
65000	8.45802e-08
65100	9.18174e-08
65200	9.47998e-08
65300	9.19671e-08
65400	8.41473e-08
65500	8.62796e-08
65600	8.64076e-08
65700	8.64404e-08
65800	9.28746e-08
65900	9.48727e-08
66000	9.51629e-08
66100	9.59064e-08
66200	8.74893e-08
66300	8.90573e-08
66400	9.46431e-08
66500	8.81268e-08
66600	8.84639e-08
66700	9.47109e-08
66800	1.02743e-07
66900	1.0237e-07
67000	1.08051e-07
67100	1.17734e-07
67200	1.66161e-07
67300	2.03862e-07
67400	1.71007e-07
67500	1.33085e-07
67600	9.79724e-08
67700	1.03712e-07
67800	1.66422e-07
67900	2.22561e-07
68000	4.26188e-07
68100	6.9786e-07
68200	1.0159e-06
68300	8.09105e-06
68400	8.58864e-06
68500	4.0662e-06
68600	1.094e-06
68700	4.77381e-07
68800	1.49258e-07
68900	1.37647e-07
69000	1.23655e-07
69100	1.14096e-07
69200	1.28523e-07
69300	1.28041e-07
69400	1.28532e-07
69500	1.08395e-07
69600	9.38933e-08
69700	9.33201e-08
69800	9.56963e-08
69900	9.88102e-08
70000	1.05122e-07
70100	1.12115e-07
70200	1.04854e-07
70300	8.90843e-08
70400	8.75597e-08
70500	8.61004e-08
70600	8.81662e-08
70700	9.83701e-08
70800	8.81772e-08
70900	8.11088e-08
71000	8.93953e-08
71100	8.53555e-08
71200	8.70532e-08
71300	9.15753e-08
71400	9.35252e-08
71500	9.11504e-08
71600	9.0638e-08
71700	8.58119e-08
71800	8.73613e-08
71900	9.0561e-08
72000	8.82057e-08
72100	9.06872e-08
72200	9.5994e-08
72300	8.70922e-08
72400	8.79567e-08
72500	9.30346e-08
72600	8.65413e-08
72700	8.67949e-08
72800	9.11379e-08
72900	8.64476e-08
73000	8.25324e-08
73100	8.7474e-08
73200	9.20186e-08
73300	9.56897e-08
73400	9.22369e-08
73500	9.51622e-08
73600	9.04751e-08
73700	9.07743e-08
73800	8.58208e-08
73900	9.24434e-08
74000	9.78635e-08
74100	8.83297e-08
74200	8.63164e-08
74300	8.3708e-08
74400	8.67562e-08
74500	8.55292e-08
74600	9.31827e-08
74700	9.35543e-08
74800	8.59232e-08
74900	8.71011e-08
75000	8.60762e-08
75100	8.61982e-08
75200	8.88101e-08
75300	8.37736e-08
75400	8.53633e-08
75500	8.31857e-08
75600	8.80142e-08
75700	8.80803e-08
75800	9.09901e-08
75900	9.17736e-08
76000	8.62073e-08
76100	8.7159e-08
76200	8.90076e-08
76300	9.07637e-08
76400	9.33329e-08
76500	9.44407e-08
76600	8.8631e-08
76700	8.61497e-08
76800	8.53245e-08
76900	8.64696e-08
77000	8.87315e-08
77100	9.77283e-08
77200	8.91449e-08
77300	9.181e-08
77400	8.51322e-08
77500	7.79936e-08
77600	8.65684e-08
77700	8.46673e-08
77800	8.14301e-08
77900	8.37657e-08
78000	8.35379e-08
78100	8.87428e-08
78200	9.19096e-08
78300	8.61773e-08
78400	8.13753e-08
78500	8.65276e-08
78600	9.03539e-08
78700	8.42451e-08
78800	8.03349e-08
78900	8.80861e-08
79000	8.66077e-08
79100	8.54063e-08
79200	8.80231e-08
79300	9.50079e-08
79400	8.96236e-08
79500	8.84537e-08
79600	9.17915e-08
79700	9.11319e-08
79800	9.16178e-08
79900	8.54793e-08
80000	8.311e-08
80100	8.87277e-08
80200	8.77409e-08
80300	8.23515e-08
80400	8.09153e-08
80500	8.25956e-08
80600	8.21134e-08
80700	8.87509e-08
80800	8.90998e-08
80900	8.36728e-08
81000	8.39745e-08
81100	8.02382e-08
81200	8.93889e-08
81300	8.40452e-08
81400	8.27566e-08
81500	8.93517e-08
81600	8.69104e-08
81700	8.85225e-08
81800	9.01999e-08
81900	8.55384e-08
82000	8.24183e-08
82100	8.34767e-08
82200	8.95129e-08
82300	8.60934e-08
82400	8.8637e-08
82500	9.11031e-08
82600	8.6738e-08
82700	8.63373e-08
82800	8.55039e-08
82900	8.19186e-08
83000	8.595e-08
83100	8.9742e-08
83200	8.27771e-08
83300	8.95898e-08
83400	9.01075e-08
83500	8.65277e-08
83600	8.8177e-08
83700	8.51046e-08
83800	8.7532e-08
83900	8.55492e-08
84000	8.69155e-08
84100	9.03814e-08
84200	9.1931e-08
84300	8.79877e-08
84400	8.44815e-08
84500	9.25875e-08
84600	9.07377e-08
84700	8.94104e-08
84800	9.19567e-08
84900	9.08327e-08
85000	8.54693e-08
85100	9.11624e-08
85200	9.02738e-08
85300	8.76968e-08
85400	8.77753e-08
85500	8.54187e-08
85600	8.9498e-08
85700	8.84994e-08
85800	8.78483e-08
85900	8.43609e-08
86000	8.09736e-08
86100	8.35158e-08
86200	8.444e-08
86300	8.37702e-08
86400	8.60816e-08
86500	8.25792e-08
86600	8.68603e-08
86700	9.1712e-08
86800	8.32669e-08
86900	8.7126e-08
87000	9.17113e-08
87100	8.31777e-08
87200	8.44489e-08
87300	8.52426e-08
87400	8.9445e-08
87500	9.05776e-08
87600	8.38404e-08
87700	8.1274e-08
87800	8.62413e-08
87900	9.42011e-08
88000	8.92684e-08
88100	8.12552e-08
88200	8.0085e-08
88300	8.735e-08
88400	8.4221e-08
88500	8.22705e-08
88600	8.67241e-08
88700	8.35119e-08
88800	8.71114e-08
88900	8.67253e-08
89000	8.55099e-08
89100	8.49611e-08
89200	8.78769e-08
89300	8.24841e-08
89400	8.45495e-08
89500	8.70333e-08
89600	8.44279e-08
89700	8.60906e-08
89800	8.48735e-08
89900	8.77885e-08
90000	8.77842e-08
90100	8.36682e-08
90200	8.90518e-08
90300	8.85469e-08
90400	8.38519e-08
90500	8.80413e-08
90600	8.42184e-08
90700	7.80428e-08
90800	8.45982e-08
90900	9.01942e-08
91000	8.6998e-08
91100	8.47472e-08
91200	8.29698e-08
91300	8.02204e-08
91400	7.781e-08
91500	8.05664e-08
91600	8.10517e-08
91700	8.29569e-08
91800	8.19628e-08
91900	8.6177e-08
92000	8.51703e-08
92100	8.59894e-08
92200	7.83955e-08
92300	8.12468e-08
92400	8.5622e-08
92500	8.75012e-08
92600	7.82574e-08
92700	7.75339e-08
92800	8.15803e-08
92900	8.38305e-08
93000	7.71471e-08
93100	7.97127e-08
93200	8.50776e-08
93300	7.63309e-08
93400	7.51787e-08
93500	8.42516e-08
93600	8.70534e-08
93700	8.30311e-08
93800	7.76389e-08
93900	7.98349e-08
94000	8.38557e-08
94100	8.17782e-08
94200	7.52258e-08
94300	7.81593e-08
94400	8.06642e-08
94500	8.37832e-08
94600	8.33077e-08
94700	8.24607e-08
94800	7.92078e-08
94900	7.97352e-08
95000	8.64831e-08
95100	8.33174e-08
95200	7.92688e-08
95300	7.94429e-08
95400	7.76928e-08
95500	8.16069e-08
95600	8.32851e-08
95700	8.23136e-08
95800	8.14557e-08
95900	8.10347e-08
96000	7.50956e-08
96100	8.14677e-08
96200	8.61435e-08
96300	8.0694e-08
96400	8.24117e-08
96500	8.65056e-08
96600	8.77699e-08
96700	8.24008e-08
96800	7.95794e-08
96900	8.17091e-08
97000	8.11814e-08
97100	8.01139e-08
97200	8.22661e-08
97300	8.38221e-08
97400	8.57503e-08
97500	8.18536e-08
97600	7.789e-08
97700	8.17526e-08
97800	8.05769e-08
97900	8.30073e-08
98000	8.235e-08
98100	7.90594e-08
98200	8.0561e-08
98300	8.03139e-08
98400	8.77995e-08
98500	8.55905e-08
98600	7.86238e-08
98700	7.38944e-08
98800	7.83296e-08
98900	7.9068e-08
99000	8.38212e-08
99100	8.33817e-08
99200	7.81116e-08
99300	7.32126e-08
99400	7.81603e-08
99500	8.63281e-08
99600	9.00955e-08
99700	8.53701e-08
99800	7.94228e-08
99900	8.63976e-08
100000	8.38709e-08
100100	8.28998e-08
100200	8.23142e-08
100300	7.86247e-08
100400	8.18075e-08
100500	8.36811e-08
100600	8.67282e-08
100700	8.37793e-08
100800	8.84978e-08
100900	9.36734e-08
101000	8.56284e-08
101100	8.51388e-08
101200	7.68681e-08
101300	7.27357e-08
101400	8.33966e-08
101500	8.5525e-08
101600	8.98571e-08
101700	8.89989e-08
101800	8.73771e-08
101900	9.17901e-08
102000	8.24084e-08
102100	8.35893e-08
102200	8.0771e-08
102300	8.04509e-08
102400	8.57396e-08
102500	7.65852e-08
102600	7.90342e-08
102700	8.09831e-08
102800	7.63591e-08
102900	7.35259e-08
103000	7.71011e-08
103100	8.20755e-08
103200	8.7251e-08
103300	8.17783e-08
103400	7.83068e-08
103500	8.05754e-08
103600	8.11814e-08
103700	8.23497e-08
103800	8.11322e-08
103900	8.07527e-08
104000	7.99326e-08
104100	7.83489e-08
104200	8.10812e-08
104300	8.63321e-08
104400	8.88301e-08
104500	8.57999e-08
104600	7.77315e-08
104700	7.36025e-08
104800	8.22535e-08
104900	7.83548e-08
105000	8.00938e-08
105100	8.40803e-08
105200	8.65976e-08
105300	8.50062e-08
105400	7.85543e-08
105500	8.09507e-08
105600	8.57115e-08
105700	7.76695e-08
105800	7.9367e-08
105900	8.31899e-08
106000	7.74794e-08
106100	7.73571e-08
106200	7.73771e-08
106300	7.20108e-08
106400	7.58863e-08
106500	8.09062e-08
106600	8.18474e-08
106700	8.01563e-08
106800	7.70979e-08
106900	7.94439e-08
107000	7.77797e-08
107100	7.81983e-08
107200	7.89179e-08
107300	8.14287e-08
107400	7.89645e-08
107500	7.51593e-08
107600	8.11532e-08
107700	8.01744e-08
107800	7.87586e-08
107900	7.96963e-08
108000	8.39658e-08
108100	8.07294e-08
108200	7.52894e-08
108300	7.87279e-08
108400	7.24152e-08
108500	7.34205e-08
108600	7.14045e-08
108700	7.09412e-08
108800	7.51388e-08
108900	7.93348e-08
109000	7.59698e-08
109100	8.23797e-08
109200	8.61709e-08
109300	8.15595e-08
109400	7.88971e-08
109500	7.93509e-08
109600	7.76062e-08
109700	7.9023e-08
109800	7.67376e-08
109900	7.86489e-08
110000	7.61092e-08
110100	7.85984e-08
110200	7.98526e-08
110300	7.82909e-08
110400	8.0877e-08
110500	8.09081e-08
110600	7.77139e-08
110700	7.71935e-08
110800	7.69283e-08
110900	7.80061e-08
111000	8.03165e-08
111100	7.97352e-08
111200	8.39878e-08
111300	8.32077e-08
111400	8.07779e-08
111500	7.41427e-08
111600	7.52001e-08
111700	7.64334e-08
111800	7.47531e-08
111900	7.8123e-08
112000	7.53404e-08
112100	7.9838e-08
112200	7.56912e-08
112300	7.52459e-08
112400	8.09889e-08
112500	8.48163e-08
112600	8.03763e-08
112700	8.0896e-08
112800	8.25358e-08
112900	8.0145e-08
113000	7.44294e-08
113100	7.2604e-08
113200	7.61247e-08
113300	7.57242e-08
113400	7.22772e-08
113500	7.00208e-08
113600	7.41395e-08
113700	7.99713e-08
113800	8.22889e-08
113900	7.97977e-08
114000	8.02943e-08
114100	7.93866e-08
114200	7.63319e-08
114300	7.62295e-08
114400	8.13875e-08
114500	7.82294e-08
114600	7.94812e-08
114700	8.07352e-08
114800	7.84184e-08
114900	8.00173e-08
115000	7.9476e-08
115100	7.31881e-08
115200	7.94955e-08
115300	7.91667e-08
115400	7.81129e-08
115500	7.55776e-08
115600	7.7353e-08
115700	7.77645e-08
115800	8.07549e-08
115900	8.06963e-08
116000	7.73305e-08
116100	7.71941e-08
116200	7.43321e-08
116300	7.70761e-08
116400	7.23169e-08
116500	7.4433e-08
116600	7.67041e-08
116700	7.77347e-08
116800	7.28985e-08
116900	6.99478e-08
117000	7.23635e-08
117100	7.90835e-08
117200	8.08595e-08
117300	7.72511e-08
117400	7.43509e-08
117500	7.28418e-08
117600	7.34797e-08
117700	7.55423e-08
117800	7.36007e-08
117900	7.60402e-08
118000	7.8252e-08
118100	7.89707e-08
118200	7.93267e-08
118300	7.51912e-08
118400	7.16355e-08
118500	7.17802e-08
118600	7.30913e-08
118700	7.78201e-08
118800	7.56143e-08
118900	7.13191e-08
119000	7.42629e-08
119100	7.80691e-08
119200	7.51047e-08
119300	7.32355e-08
119400	7.496e-08
119500	7.56387e-08
119600	7.38296e-08
119700	7.56406e-08
119800	7.97318e-08
119900	7.80114e-08
120000	7.41215e-08
120100	7.95616e-08
120200	7.47438e-08
120300	7.2149e-08
120400	7.34629e-08
120500	7.20327e-08
120600	7.45896e-08
120700	7.60005e-08
120800	7.55514e-08
120900	7.31996e-08
121000	7.43622e-08
121100	7.92489e-08
121200	7.78336e-08
121300	7.60351e-08
121400	7.27151e-08
121500	6.91816e-08
121600	6.62844e-08
121700	7.07485e-08
121800	7.43216e-08
121900	7.77729e-08
122000	7.72764e-08
122100	7.36053e-08
122200	7.21644e-08
122300	7.89288e-08
122400	7.43149e-08
122500	7.47867e-08
122600	7.72118e-08
122700	7.04988e-08
122800	7.42675e-08
122900	7.72798e-08
123000	8.02654e-08
123100	8.09667e-08
123200	7.38156e-08
123300	7.71296e-08
123400	7.20099e-08
123500	7.35644e-08
123600	7.6618e-08
123700	7.24479e-08
123800	7.48763e-08
123900	7.91864e-08
124000	8.18197e-08
124100	8.15008e-08
124200	7.37186e-08
124300	7.51638e-08
124400	7.57936e-08
124500	7.96858e-08
124600	8.04992e-08
124700	7.39793e-08
124800	7.22538e-08
124900	7.50066e-08
125000	7.6614e-08
125100	7.71962e-08
125200	7.64082e-08
125300	7.85298e-08
125400	7.42939e-08
125500	7.39161e-08
125600	7.51603e-08
125700	6.92843e-08
125800	7.13395e-08
125900	7.58476e-08
126000	7.59544e-08
126100	7.6485e-08
126200	7.60529e-08
126300	7.06338e-08
126400	7.43988e-08
126500	7.31631e-08
126600	7.49181e-08
126700	7.16495e-08
126800	6.99144e-08
126900	6.80379e-08
127000	7.50342e-08
127100	8.00645e-08
127200	7.38053e-08
127300	7.43483e-08
127400	7.09821e-08
127500	7.36236e-08
127600	7.34311e-08
127700	6.79238e-08
127800	6.84268e-08
127900	7.56086e-08
128000	7.19916e-08
128100	7.3437e-08
128200	7.20773e-08
128300	7.05477e-08
128400	6.92172e-08
128500	7.13038e-08
128600	7.37208e-08
128700	7.66128e-08
128800	7.19835e-08
128900	6.52588e-08
129000	7.16004e-08
129100	7.63796e-08
129200	7.49352e-08
129300	7.03114e-08
129400	7.21213e-08
129500	7.26167e-08
129600	6.85882e-08
129700	6.41769e-08
129800	6.77191e-08
129900	6.69805e-08
130000	7.32212e-08
130100	6.80773e-08
130200	7.08863e-08
130300	7.30786e-08
130400	7.79007e-08
130500	7.42833e-08
130600	7.36422e-08
130700	6.96324e-08
130800	6.84682e-08
130900	6.9154e-08
131000	7.01839e-08
131100	7.31442e-08
131200	7.34477e-08
131300	7.19751e-08
131400	6.69583e-08
131500	6.69688e-08
131600	7.21961e-08
131700	1.05278e-07
131800	1.10779e-07
131900	7.66579e-08
132000	7.49675e-08
132100	7.11853e-08
132200	7.34965e-08
132300	6.70259e-08
132400	6.92591e-08
132500	6.91575e-08
132600	6.83581e-08
132700	7.15943e-08
132800	6.66663e-08
132900	6.86312e-08
133000	6.89555e-08
133100	6.7595e-08
133200	7.3227e-08
133300	7.60073e-08
133400	6.98891e-08
133500	6.72471e-08
133600	6.64219e-08
133700	6.7434e-08
133800	7.13207e-08
133900	7.0094e-08
134000	7.04094e-08
134100	6.67188e-08
134200	6.36478e-08
134300	6.46605e-08
134400	7.03144e-08
134500	7.26403e-08
134600	7.17322e-08
134700	7.27859e-08
134800	7.41282e-08
134900	7.43044e-08
135000	6.94276e-08
135100	7.0683e-08
135200	7.47344e-08
135300	7.4356e-08
135400	7.27958e-08
135500	6.73986e-08
135600	6.84309e-08
135700	6.93807e-08
135800	6.57182e-08
135900	6.73786e-08
136000	6.7297e-08
136100	6.91641e-08
136200	7.32473e-08
136300	7.30633e-08
136400	6.91081e-08
136500	6.86439e-08
136600	6.9398e-08
136700	6.89082e-08
136800	7.08999e-08
136900	6.95478e-08
137000	7.50925e-08
137100	7.11727e-08
137200	6.53684e-08
137300	6.9546e-08
137400	7.56996e-08
137500	7.46045e-08
137600	6.68577e-08
137700	6.66672e-08
137800	7.24023e-08
137900	7.2678e-08
138000	7.3411e-08
138100	7.33362e-08
138200	6.93772e-08
138300	7.1574e-08
138400	6.98012e-08
138500	7.17687e-08
138600	6.64515e-08
138700	6.79586e-08
138800	6.83026e-08
138900	6.61298e-08
139000	6.73193e-08
139100	6.7123e-08
139200	6.45204e-08
139300	6.25347e-08
139400	6.75997e-08
139500	6.74535e-08
139600	6.64894e-08
139700	6.90885e-08
139800	7.16957e-08
139900	7.01576e-08
140000	6.98378e-08
140100	6.69925e-08
140200	6.87638e-08
140300	7.06898e-08
140400	7.20461e-08
140500	6.5955e-08
140600	6.13344e-08
140700	6.27049e-08
140800	7.25425e-08
140900	7.28548e-08
141000	7.37899e-08
141100	7.31747e-08
141200	7.02548e-08
141300	6.7852e-08
141400	7.02694e-08
141500	7.01522e-08
141600	7.37462e-08
141700	7.17077e-08
141800	6.2549e-08
141900	6.69719e-08
142000	7.40144e-08
142100	7.04489e-08
142200	6.92236e-08
142300	7.01878e-08
142400	6.83714e-08
142500	6.53548e-08
142600	7.15922e-08
142700	6.66411e-08
142800	6.02407e-08
142900	6.1545e-08
143000	6.86388e-08
143100	6.82616e-08
143200	6.61847e-08
143300	6.39322e-08
143400	6.23335e-08
143500	6.45057e-08
143600	6.59974e-08
143700	6.62511e-08
143800	6.567e-08
143900	6.38799e-08
144000	7.02965e-08
144100	7.15681e-08
144200	6.73704e-08
144300	6.44696e-08
144400	6.46635e-08
144500	6.2174e-08
144600	6.1046e-08
144700	6.39348e-08
144800	6.63502e-08
144900	6.5605e-08
145000	6.43659e-08
145100	6.58851e-08
145200	6.9341e-08
145300	6.12899e-08
145400	6.57767e-08
145500	7.3048e-08
145600	7.18278e-08
145700	6.57761e-08
145800	6.45439e-08
145900	6.59257e-08
146000	6.82124e-08
146100	6.80177e-08
146200	7.08567e-08
146300	7.39006e-08
146400	6.56828e-08
146500	6.89352e-08
146600	6.96742e-08
146700	6.64432e-08
146800	6.73839e-08
146900	6.74265e-08
147000	6.86388e-08
147100	6.63445e-08
147200	6.23557e-08
147300	6.18275e-08
147400	6.67556e-08
147500	6.56253e-08
147600	6.2585e-08
147700	6.17886e-08
147800	6.4274e-08
147900	6.40367e-08
148000	6.07923e-08
148100	6.87732e-08
148200	7.21951e-08
148300	6.75634e-08
148400	6.72933e-08
148500	5.91182e-08
148600	6.34726e-08
148700	6.24107e-08
148800	6.58023e-08
148900	6.36667e-08
149000	5.73365e-08
149100	6.31875e-08
149200	6.31577e-08
149300	6.51654e-08
149400	6.4195e-08
149500	6.40683e-08
149600	6.0492e-08
149700	6.22536e-08
149800	6.50385e-08
149900	6.46026e-08
150000	6.3278e-08
150100	6.72965e-08
150200	7.07219e-08
150300	6.61465e-08
150400	5.96417e-08
150500	6.19933e-08
150600	6.19193e-08
150700	6.62212e-08
150800	6.86826e-08
150900	6.77856e-08
151000	6.5852e-08
151100	6.67321e-08
151200	6.62201e-08
151300	6.39348e-08
151400	6.09924e-08
151500	6.12603e-08
151600	6.017e-08
151700	6.17481e-08
151800	6.25667e-08
151900	6.64717e-08
152000	6.61565e-08
152100	6.54754e-08
152200	6.4748e-08
152300	6.47326e-08
152400	6.21578e-08
152500	6.28171e-08
152600	6.69133e-08
152700	7.11932e-08
152800	6.97774e-08
152900	6.68574e-08
153000	6.07245e-08
153100	6.1046e-08
153200	6.87505e-08
153300	6.99147e-08
153400	6.58511e-08
153500	5.97681e-08
153600	5.78153e-08
153700	5.98327e-08
153800	6.4368e-08
153900	6.14579e-08
154000	5.91684e-08
154100	6.28347e-08
154200	6.82894e-08
154300	6.79964e-08
154400	6.83826e-08
154500	6.78511e-08
154600	6.36467e-08
154700	5.99e-08
154800	6.19115e-08
154900	6.30129e-08
155000	6.44843e-08
155100	6.38813e-08
155200	6.32269e-08
155300	6.75956e-08
155400	6.56542e-08
155500	6.55556e-08
155600	6.64402e-08
155700	6.22444e-08
155800	6.05258e-08
155900	6.70687e-08
156000	7.16956e-08
156100	6.56994e-08
156200	6.37158e-08
156300	6.64088e-08
156400	6.32428e-08
156500	6.16409e-08
156600	6.50426e-08
156700	5.94491e-08
156800	5.99073e-08
156900	6.68063e-08
157000	6.03959e-08
157100	6.04448e-08
157200	6.1881e-08
157300	6.77718e-08
157400	7.10563e-08
157500	6.85402e-08
157600	6.44622e-08
157700	6.16563e-08
157800	6.24971e-08
157900	6.6367e-08
158000	6.39447e-08
158100	6.38869e-08
158200	6.27307e-08
158300	5.68337e-08
158400	6.19394e-08
158500	6.03819e-08
158600	6.60999e-08
158700	6.25427e-08
158800	6.41749e-08
158900	6.37144e-08
159000	6.27251e-08
159100	5.64268e-08
159200	5.84488e-08
159300	6.05547e-08
159400	6.26259e-08
159500	6.17061e-08
159600	6.71085e-08
159700	6.47756e-08
159800	5.92262e-08
159900	6.16999e-08
160000	6.02227e-08
160100	6.14658e-08
160200	5.562e-08
160300	5.64574e-08
160400	6.74324e-08
160500	6.45309e-08
160600	6.46761e-08
160700	6.13207e-08
160800	6.21183e-08
160900	6.58838e-08
161000	6.67566e-08
161100	5.89896e-08
161200	6.08124e-08
161300	6.41384e-08
161400	6.36316e-08
161500	6.02779e-08
161600	6.01028e-08
161700	6.25634e-08
161800	6.30265e-08
161900	6.36532e-08
162000	6.27427e-08
162100	6.3081e-08
162200	6.58515e-08
162300	6.87261e-08
162400	6.59447e-08
162500	5.90683e-08
162600	5.52742e-08
162700	5.65279e-08
162800	6.29132e-08
162900	6.57666e-08
163000	6.09302e-08
163100	6.40416e-08
163200	6.55854e-08
163300	6.16511e-08
163400	6.205e-08
163500	6.4136e-08
163600	6.29518e-08
163700	6.2462e-08
163800	6.41161e-08
163900	6.11847e-08
164000	6.08356e-08
164100	6.11184e-08
164200	6.17606e-08
164300	6.51951e-08
164400	6.32304e-08
164500	6.37823e-08
164600	6.66725e-08
164700	6.36467e-08
164800	6.28454e-08
164900	6.35122e-08
165000	6.31848e-08
165100	6.20847e-08
165200	6.23889e-08
165300	6.33072e-08
165400	6.2685e-08
165500	5.95977e-08
165600	5.65013e-08
165700	5.88245e-08
165800	6.21237e-08
165900	6.4325e-08
166000	6.36974e-08
166100	6.10042e-08
166200	5.88907e-08
166300	5.80959e-08
166400	6.08456e-08
166500	5.85841e-08
166600	6.18239e-08
166700	6.29574e-08
166800	6.42451e-08
166900	6.25534e-08
167000	6.08445e-08
167100	6.25521e-08
167200	6.13263e-08
167300	5.71817e-08
167400	5.7038e-08
167500	6.13989e-08
167600	6.06093e-08
167700	5.63941e-08
167800	5.71416e-08
167900	6.05113e-08
168000	6.39049e-08
168100	6.10189e-08
168200	5.76964e-08
168300	5.76097e-08
168400	5.84768e-08
168500	5.99967e-08
168600	6.27575e-08
168700	6.27713e-08
168800	6.58195e-08
168900	6.35829e-08
169000	6.00999e-08
169100	5.99546e-08
169200	5.98463e-08
169300	5.90972e-08
169400	6.0237e-08
169500	6.1158e-08
169600	6.06462e-08
169700	6.12174e-08
169800	5.59271e-08
169900	5.78904e-08
170000	5.89788e-08
170100	5.99536e-08
170200	6.12035e-08
170300	6.00239e-08
170400	5.53153e-08
170500	5.51582e-08
170600	5.45512e-08
170700	5.87325e-08
170800	6.66492e-08
170900	6.87493e-08
171000	6.40072e-08
171100	6.20251e-08
171200	6.16216e-08
171300	6.17147e-08
171400	6.19736e-08
171500	6.0378e-08
171600	6.01327e-08
171700	5.59678e-08
171800	5.88033e-08
171900	5.91441e-08
172000	5.74456e-08
172100	5.51318e-08
172200	5.41515e-08
172300	5.81226e-08
172400	6.00235e-08
172500	5.57848e-08
172600	6.15739e-08
172700	6.26177e-08
172800	6.42343e-08
172900	5.98782e-08
173000	5.8543e-08
173100	5.93585e-08
173200	6.15999e-08
173300	6.05061e-08
173400	5.61684e-08
173500	5.84617e-08
173600	5.97173e-08
173700	5.69447e-08
173800	5.93379e-08
173900	6.1699e-08
174000	5.97567e-08
174100	5.66258e-08
174200	6.23433e-08
174300	6.38779e-08
174400	5.76237e-08
174500	5.75581e-08
174600	5.80719e-08
174700	5.95949e-08
174800	6.13968e-08
174900	6.00103e-08
175000	6.11646e-08
175100	6.26172e-08
175200	5.72731e-08
175300	5.85141e-08
175400	5.43547e-08
175500	5.66949e-08
175600	5.9427e-08
175700	5.73767e-08
175800	5.8044e-08
175900	5.47436e-08
176000	5.37784e-08
176100	6.05606e-08
176200	6.20008e-08
176300	5.82461e-08
176400	5.53351e-08
176500	5.92917e-08
176600	5.92836e-08
176700	5.56317e-08
176800	5.8716e-08
176900	5.59126e-08
177000	5.7968e-08
177100	5.83701e-08
177200	5.82167e-08
177300	6.01357e-08
177400	5.77755e-08
177500	5.93819e-08
177600	5.84469e-08
177700	5.74695e-08
177800	5.45887e-08
177900	5.3772e-08
178000	5.61319e-08
178100	5.85548e-08
178200	6.11908e-08
178300	5.3343e-08
178400	5.89547e-08
178500	5.66325e-08
178600	5.80288e-08
178700	5.7486e-08
178800	5.52607e-08
178900	5.79203e-08
179000	5.46235e-08
179100	5.562e-08
179200	6.15692e-08
179300	5.95858e-08
179400	5.74053e-08
179500	5.52635e-08
179600	5.63613e-08
179700	5.80579e-08
179800	5.90934e-08
179900	5.39422e-08
180000	5.26841e-08
180100	5.59704e-08
180200	5.70123e-08
180300	5.44876e-08
180400	5.53064e-08
180500	5.65893e-08
180600	5.48335e-08
180700	5.17887e-08
180800	5.51667e-08
180900	6.30599e-08
181000	6.34241e-08
181100	5.84821e-08
181200	6.00669e-08
181300	5.67894e-08
181400	5.56476e-08
181500	5.75664e-08
181600	5.85601e-08
181700	5.59036e-08
181800	5.51693e-08
181900	5.83848e-08
182000	5.82091e-08
182100	5.84078e-08
182200	5.85277e-08
182300	5.32166e-08
182400	5.23391e-08
182500	5.85932e-08
182600	5.87478e-08
182700	5.33224e-08
182800	5.30037e-08
182900	5.54592e-08
183000	5.58618e-08
183100	5.96105e-08
183200	5.69963e-08
183300	5.68088e-08
183400	5.62687e-08
183500	5.36087e-08
183600	5.51132e-08
183700	5.44391e-08
183800	5.55327e-08
183900	5.69704e-08
184000	5.51026e-08
184100	5.25189e-08
184200	5.75526e-08
184300	5.68337e-08
184400	5.42212e-08
184500	4.92294e-08
184600	5.62367e-08
184700	5.93706e-08
184800	5.83486e-08
184900	5.61535e-08
185000	6.02022e-08
185100	5.5331e-08
185200	5.04098e-08
185300	5.50465e-08
185400	6.17075e-08
185500	5.61026e-08
185600	5.46912e-08
185700	5.75171e-08
185800	5.37152e-08
185900	5.77482e-08
186000	5.76859e-08
186100	5.69474e-08
186200	5.32272e-08
186300	5.31224e-08
186400	5.13946e-08
186500	4.94131e-08
186600	5.18495e-08
186700	5.37082e-08
186800	4.96736e-08
186900	5.37e-08
187000	5.60596e-08
187100	5.23261e-08
187200	5.26172e-08
187300	5.4208e-08
187400	5.42814e-08
187500	5.68323e-08
187600	5.74994e-08
187700	5.77773e-08
187800	6.05154e-08
187900	5.59971e-08
188000	5.35283e-08
188100	5.1656e-08
188200	4.9762e-08
188300	5.55247e-08
188400	5.68399e-08
188500	5.63763e-08
188600	5.45297e-08
188700	5.2596e-08
188800	5.35794e-08
188900	5.43975e-08
189000	5.86382e-08
189100	5.65979e-08
189200	5.20298e-08
189300	5.26012e-08
189400	5.57049e-08
189500	5.4703e-08
189600	5.4249e-08
189700	5.45648e-08
189800	5.47487e-08
189900	5.51268e-08
190000	5.4063e-08
190100	5.24967e-08
190200	5.21657e-08
190300	5.36992e-08
190400	5.67734e-08
190500	5.75244e-08
190600	5.49106e-08
190700	5.64366e-08
190800	5.01654e-08
190900	5.11232e-08
191000	5.48906e-08
191100	5.68403e-08
191200	5.52252e-08
191300	5.35149e-08
191400	5.71823e-08
191500	5.40394e-08
191600	5.667e-08
191700	5.58454e-08
191800	5.22816e-08
191900	5.16208e-08
192000	5.56487e-08
192100	5.57584e-08
192200	5.31282e-08
192300	5.86683e-08
192400	6.01084e-08
192500	5.58568e-08
192600	5.312e-08
192700	5.35751e-08
192800	5.31667e-08
192900	5.23426e-08
193000	5.29149e-08
193100	5.3373e-08
193200	5.25062e-08
193300	5.58905e-08
193400	5.58518e-08
193500	5.74958e-08
193600	5.19567e-08
193700	5.30299e-08
193800	5.55447e-08
193900	4.92004e-08
194000	4.90749e-08
194100	4.87022e-08
194200	5.45684e-08
194300	5.12734e-08
194400	5.26145e-08
194500	5.64457e-08
194600	5.56942e-08
194700	5.16649e-08
194800	4.88831e-08
194900	5.08152e-08
195000	5.11724e-08
195100	5.22525e-08
195200	5.21209e-08
195300	5.35782e-08
195400	5.07683e-08
195500	5.17778e-08
195600	5.71189e-08
195700	5.55398e-08
195800	5.42925e-08
195900	5.19659e-08
196000	5.02689e-08
196100	5.1417e-08
196200	5.07461e-08
196300	5.10102e-08
196400	5.07309e-08
196500	4.9521e-08
196600	4.87608e-08
196700	5.07365e-08
196800	5.13305e-08
196900	4.67184e-08
197000	5.10984e-08
197100	5.2866e-08
197200	4.93221e-08
197300	4.84776e-08
197400	4.8262e-08
197500	5.17539e-08
197600	5.56324e-08
197700	5.38728e-08
197800	5.0888e-08
197900	4.90222e-08
198000	5.231e-08
198100	5.52173e-08
198200	5.18705e-08
198300	5.05361e-08
198400	5.05162e-08
198500	5.05879e-08
198600	5.04923e-08
198700	5.66261e-08
198800	5.67894e-08
198900	5.56071e-08
199000	5.80794e-08
199100	5.98818e-08
199200	5.62146e-08
199300	5.5549e-08
199400	5.32743e-08
199500	5.27996e-08
199600	5.26678e-08
199700	5.45391e-08
[truncated: 1,002 more rows]

## Sheet: Sheet7
Fig EXT 5g
freq (Hz)	Sv (arb.)
0	1.46715e-06
100	1.55132e-06
200	7.77045e-07
300	2.23465e-07
400	2.11709e-07
500	1.93405e-07
600	1.81142e-07
700	1.58292e-07
800	1.42508e-07
900	1.52255e-07
1000	1.58635e-07
1100	1.49105e-07
1200	1.35813e-07
1300	1.40049e-07
1400	1.42048e-07
1500	1.29558e-07
1600	1.21646e-07
1700	1.31508e-07
1800	1.40405e-07
1900	1.31754e-07
2000	1.29824e-07
2100	1.24157e-07
2200	1.15465e-07
2300	1.22426e-07
2400	1.26035e-07
2500	1.23758e-07
2600	1.21603e-07
2700	1.27384e-07
2800	1.22843e-07
2900	1.24725e-07
3000	1.18834e-07
3100	1.20348e-07
3200	1.22576e-07
3300	1.05504e-07
3400	1.08543e-07
3500	1.15073e-07
3600	1.13595e-07
3700	1.12424e-07
3800	1.08752e-07
3900	1.12911e-07
4000	1.13125e-07
4100	1.21272e-07
4200	1.15762e-07
4300	1.10745e-07
4400	1.13514e-07
4500	1.2113e-07
4600	1.22452e-07
4700	1.16129e-07
4800	1.11753e-07
4900	1.15076e-07
5000	1.20431e-07
5100	1.16024e-07
5200	1.12828e-07
5300	1.09805e-07
5400	1.1163e-07
5500	1.05484e-07
5600	1.10487e-07
5700	1.10947e-07
5800	1.07487e-07
5900	9.95391e-08
6000	1.01973e-07
6100	1.10298e-07
6200	1.1186e-07
6300	1.13545e-07
6400	1.10999e-07
6500	1.07023e-07
6600	1.10989e-07
6700	1.07384e-07
6800	1.0714e-07
6900	1.12864e-07
7000	1.05823e-07
7100	1.07168e-07
7200	1.12002e-07
7300	1.13727e-07
7400	1.14263e-07
7500	1.05516e-07
7600	9.99776e-08
7700	9.78856e-08
7800	1.01484e-07
7900	1.00964e-07
8000	1.08464e-07
8100	1.12855e-07
8200	1.13416e-07
8300	1.15282e-07
8400	1.08319e-07
8500	1.03782e-07
8600	1.12819e-07
8700	1.06511e-07
8800	1.04624e-07
8900	1.04606e-07
9000	1.02663e-07
9100	9.94352e-08
9200	1.03058e-07
9300	9.60708e-08
9400	9.85332e-08
9500	1.00734e-07
9600	1.11395e-07
9700	1.09097e-07
9800	1.07056e-07
9900	1.10108e-07
10000	1.09985e-07
10100	1.14367e-07
10200	1.13449e-07
10300	1.04457e-07
10400	1.02292e-07
10500	1.13036e-07
10600	1.15459e-07
10700	1.09493e-07
10800	1.0426e-07
10900	1.10009e-07
11000	1.08042e-07
11100	1.01062e-07
11200	1.01923e-07
11300	1.00868e-07
11400	1.12059e-07
11500	1.09711e-07
11600	1.1179e-07
11700	1.05415e-07
11800	1.10691e-07
11900	1.16347e-07
12000	1.15503e-07
12100	1.08557e-07
12200	1.0422e-07
12300	1.07505e-07
12400	1.02715e-07
12500	9.83808e-08
12600	1.03326e-07
12700	1.05975e-07
12800	1.05332e-07
12900	1.11615e-07
13000	1.11731e-07
13100	1.19218e-07
13200	1.14815e-07
13300	1.06307e-07
13400	1.12592e-07
13500	1.14871e-07
13600	1.09968e-07
13700	1.031e-07
13800	1.029e-07
13900	1.01777e-07
14000	1.07469e-07
14100	1.0764e-07
14200	1.12128e-07
14300	1.16014e-07
14400	1.14962e-07
14500	1.08991e-07
14600	1.0821e-07
14700	1.04607e-07
14800	1.05047e-07
14900	1.05961e-07
15000	1.00395e-07
15100	1.01809e-07
15200	1.07064e-07
15300	1.10455e-07
15400	1.04309e-07
15500	1.04121e-07
15600	1.09481e-07
15700	1.12314e-07
15800	1.08494e-07
15900	1.12214e-07
16000	1.06386e-07
16100	1.05755e-07
16200	1.06214e-07
16300	1.00637e-07
16400	1.04558e-07
16500	1.05585e-07
16600	1.03034e-07
16700	1.01921e-07
16800	1.04355e-07
16900	1.12598e-07
17000	1.11261e-07
17100	1.09542e-07
17200	1.10448e-07
17300	1.0468e-07
17400	1.00812e-07
17500	1.08443e-07
17600	1.12814e-07
17700	1.13863e-07
17800	1.10562e-07
17900	1.09945e-07
18000	1.13943e-07
18100	9.92872e-08
18200	1.0172e-07
18300	1.11333e-07
18400	1.15141e-07
18500	1.04763e-07
18600	1.02144e-07
18700	1.05306e-07
18800	1.06453e-07
18900	1.05519e-07
19000	9.64892e-08
19100	9.39516e-08
19200	1.08578e-07
19300	1.03329e-07
19400	1.02012e-07
19500	1.06847e-07
19600	1.08208e-07
19700	1.0512e-07
19800	1.0307e-07
19900	1.03928e-07
20000	1.04252e-07
20100	1.10514e-07
20200	1.03742e-07
20300	1.06806e-07
20400	1.10517e-07
20500	1.02312e-07
20600	1.03195e-07
20700	1.03763e-07
20800	1.06117e-07
20900	1.07585e-07
21000	1.08063e-07
21100	1.11314e-07
21200	1.11687e-07
21300	1.04939e-07
21400	1.05938e-07
21500	1.07133e-07
21600	1.08774e-07
21700	1.0531e-07
21800	1.04926e-07
21900	1.03657e-07
22000	1.00758e-07
22100	1.07115e-07
22200	1.07575e-07
22300	1.0953e-07
22400	1.14272e-07
22500	1.0987e-07
22600	1.04947e-07
22700	1.0528e-07
22800	1.0578e-07
22900	1.06845e-07
23000	1.08529e-07
23100	1.04688e-07
23200	1.00999e-07
23300	1.03886e-07
23400	1.06381e-07
23500	1.07287e-07
23600	1.05586e-07
23700	1.06392e-07
23800	9.76575e-08
23900	9.72913e-08
24000	1.0278e-07
24100	1.06653e-07
24200	1.05201e-07
24300	1.01229e-07
24400	1.00793e-07
24500	1.03091e-07
24600	1.07577e-07
24700	1.08272e-07
24800	1.05972e-07
24900	1.06437e-07
25000	1.03061e-07
25100	1.05109e-07
25200	1.01084e-07
25300	1.04269e-07
25400	1.01587e-07
25500	1.04689e-07
25600	1.05182e-07
25700	1.06899e-07
25800	1.08297e-07
25900	1.06665e-07
26000	1.17749e-07
26100	1.17311e-07
26200	1.08788e-07
26300	1.04926e-07
26400	1.05909e-07
26500	1.07853e-07
26600	1.11691e-07
26700	1.05518e-07
26800	1.06025e-07
26900	1.03194e-07
27000	1.07408e-07
27100	1.19308e-07
27200	1.13434e-07
27300	9.93908e-08
27400	9.95344e-08
27500	1.04982e-07
27600	1.01875e-07
27700	1.08909e-07
27800	1.01867e-07
27900	1.04986e-07
28000	1.00694e-07
28100	1.01528e-07
28200	1.01157e-07
28300	1.0217e-07
28400	1.02499e-07
28500	1.03466e-07
28600	1.08942e-07
28700	1.07058e-07
28800	9.8952e-08
28900	9.86375e-08
29000	1.03831e-07
29100	1.05944e-07
29200	1.05792e-07
29300	9.98504e-08
29400	1.07247e-07
29500	1.01852e-07
29600	9.5131e-08
29700	9.85161e-08
29800	1.0363e-07
29900	1.02171e-07
30000	1.02382e-07
30100	1.03981e-07
30200	1.02663e-07
30300	9.93552e-08
30400	1.01922e-07
30500	1.064e-07
30600	1.01069e-07
30700	1.03916e-07
30800	1.08517e-07
30900	1.05676e-07
31000	1.0574e-07
31100	1.02996e-07
31200	9.79319e-08
31300	1.00557e-07
31400	1.06366e-07
31500	9.74905e-08
31600	1.00537e-07
31700	1.02034e-07
31800	1.06688e-07
31900	1.08653e-07
32000	1.04897e-07
32100	1.06907e-07
32200	1.05572e-07
32300	1.01367e-07
32400	1.01731e-07
32500	1.06527e-07
32600	1.06751e-07
32700	1.02007e-07
32800	9.69697e-08
32900	1.00236e-07
33000	1.07099e-07
33100	1.0569e-07
33200	1.02429e-07
33300	1.09714e-07
33400	1.02899e-07
33500	9.96925e-08
33600	1.01338e-07
33700	9.78028e-08
33800	9.66358e-08
33900	1.06246e-07
34000	1.0104e-07
34100	1.07936e-07
34200	1.13079e-07
34300	1.0141e-07
34400	1.01757e-07
34500	9.9467e-08
34600	1.01931e-07
34700	1.03393e-07
34800	1.03784e-07
34900	9.80552e-08
35000	1.00396e-07
35100	1.01083e-07
35200	1.00333e-07
35300	9.352e-08
35400	1.03102e-07
35500	1.06583e-07
35600	1.03473e-07
35700	1.08039e-07
35800	1.04714e-07
35900	9.60191e-08
36000	9.82492e-08
36100	1.02546e-07
36200	9.8726e-08
36300	1.05927e-07
36400	1.07867e-07
36500	1.00167e-07
36600	1.0156e-07
36700	1.03574e-07
36800	1.03324e-07
36900	1.06291e-07
37000	1.06416e-07
37100	9.88495e-08
37200	9.80828e-08
37300	9.98688e-08
37400	1.09313e-07
37500	1.05412e-07
37600	1.02459e-07
37700	1.04111e-07
37800	1.03228e-07
37900	1.03343e-07
38000	1.08782e-07
38100	1.0947e-07
38200	1.08423e-07
38300	9.77335e-08
38400	1.01906e-07
38500	1.06978e-07
38600	1.0213e-07
38700	1.02327e-07
38800	9.55694e-08
38900	9.71924e-08
39000	9.9108e-08
39100	1.05146e-07
39200	1.04247e-07
39300	1.11867e-07
39400	1.0951e-07
39500	1.05907e-07
39600	1.06459e-07
39700	1.00809e-07
39800	1.00526e-07
39900	9.9676e-08
40000	1.01584e-07
40100	1.03758e-07
40200	1.01558e-07
40300	1.07604e-07
40400	1.09912e-07
40500	1.08879e-07
40600	1.09983e-07
40700	1.08034e-07
40800	9.6875e-08
40900	1.02815e-07
41000	1.10136e-07
41100	1.12741e-07
41200	1.04985e-07
41300	9.98882e-08
41400	1.02324e-07
41500	1.12483e-07
41600	1.0635e-07
41700	9.77916e-08
41800	1.02906e-07
41900	1.07469e-07
42000	1.01535e-07
42100	1.07968e-07
42200	1.09779e-07
42300	1.04511e-07
42400	1.04554e-07
42500	1.04027e-07
42600	1.03184e-07
42700	1.01544e-07
42800	1.02798e-07
42900	9.83051e-08
43000	9.80252e-08
43100	9.65515e-08
43200	9.56619e-08
43300	9.81382e-08
43400	1.03005e-07
43500	1.07242e-07
43600	1.01516e-07
43700	1.09856e-07
43800	1.04504e-07
43900	9.99642e-08
44000	1.06856e-07
44100	1.12584e-07
44200	1.04142e-07
44300	9.26853e-08
44400	9.61028e-08
44500	9.64529e-08
44600	9.65715e-08
44700	1.01303e-07
44800	9.82812e-08
44900	9.77712e-08
45000	1.05998e-07
45100	1.00004e-07
45200	1.02202e-07
45300	1.02461e-07
45400	9.68095e-08
45500	9.73805e-08
45600	1.02975e-07
45700	1.05826e-07
45800	1.01742e-07
45900	1.04941e-07
46000	1.05681e-07
46100	9.83431e-08
46200	9.29353e-08
46300	1.01628e-07
46400	1.01686e-07
46500	1.02136e-07
46600	9.73374e-08
46700	9.80645e-08
46800	1.01986e-07
46900	1.02474e-07
47000	1.01959e-07
47100	1.0542e-07
47200	1.09706e-07
47300	1.02039e-07
47400	9.56942e-08
47500	9.2655e-08
47600	1.01735e-07
47700	1.07995e-07
47800	9.68227e-08
47900	1.01078e-07
48000	1.05588e-07
48100	1.03903e-07
48200	1.06379e-07
48300	9.70579e-08
48400	9.43879e-08
48500	9.55636e-08
48600	1.03082e-07
48700	1.03116e-07
48800	1.09619e-07
48900	1.07899e-07
49000	9.75411e-08
49100	9.95061e-08
49200	9.77877e-08
49300	1.01355e-07
49400	1.01673e-07
49500	1.04163e-07
49600	1.01317e-07
49700	1.06497e-07
49800	1.07421e-07
49900	1.02712e-07
50000	1.01354e-07
50100	1.03561e-07
50200	1.03704e-07
50300	1.07748e-07
50400	9.89403e-08
50500	9.85089e-08
50600	1.0541e-07
50700	1.05651e-07
50800	1.08992e-07
50900	1.06687e-07
51000	1.0541e-07
51100	1.13252e-07
51200	1.07379e-07
51300	1.00682e-07
51400	1.10668e-07
51500	1.07841e-07
51600	1.07805e-07
51700	1.01462e-07
51800	1.02741e-07
51900	1.04094e-07
52000	1.08283e-07
52100	9.6017e-08
52200	1.0088e-07
52300	9.73077e-08
52400	9.8164e-08
52500	9.94057e-08
52600	1.01889e-07
52700	1.01826e-07
52800	9.95738e-08
52900	1.05125e-07
53000	1.04671e-07
53100	1.02161e-07
53200	9.85647e-08
53300	1.03536e-07
53400	1.03461e-07
53500	1.07011e-07
53600	1.02297e-07
53700	9.31233e-08
53800	1.00449e-07
53900	1.04582e-07
54000	1.03318e-07
54100	9.78848e-08
54200	1.04065e-07
54300	1.05811e-07
54400	9.14701e-08
54500	9.95557e-08
54600	9.68898e-08
54700	9.5419e-08
54800	1.03601e-07
54900	9.95586e-08
55000	9.05716e-08
55100	9.579e-08
55200	1.03967e-07
55300	1.00967e-07
55400	9.4246e-08
55500	9.32418e-08
55600	9.83215e-08
55700	1.04826e-07
55800	1.00183e-07
55900	9.6861e-08
56000	9.48379e-08
56100	1.01327e-07
56200	1.03154e-07
56300	9.74263e-08
56400	9.46219e-08
56500	1.0037e-07
56600	1.02776e-07
56700	9.68936e-08
56800	1.00419e-07
56900	1.03061e-07
57000	9.36417e-08
57100	9.25593e-08
57200	9.10179e-08
57300	9.27073e-08
57400	9.81228e-08
57500	9.80904e-08
57600	9.41212e-08
57700	9.62141e-08
57800	9.38012e-08
57900	9.16388e-08
58000	9.81998e-08
58100	1.00269e-07
58200	9.36073e-08
58300	9.74706e-08
58400	9.7084e-08
58500	9.2795e-08
58600	9.86105e-08
58700	9.58873e-08
58800	9.97272e-08
58900	1.01314e-07
59000	9.80433e-08
59100	1.03451e-07
59200	1.04283e-07
59300	1.05788e-07
59400	9.92727e-08
59500	1.0033e-07
59600	9.73764e-08
59700	9.94154e-08
59800	9.9981e-08
59900	1.01303e-07
60000	9.83294e-08
60100	9.4487e-08
60200	9.12226e-08
60300	9.95382e-08
60400	1.03559e-07
60500	1.04575e-07
60600	9.73538e-08
60700	1.03502e-07
60800	1.01893e-07
60900	1.00995e-07
61000	9.56092e-08
61100	1.01798e-07
61200	1.00232e-07
61300	9.62997e-08
61400	9.84295e-08
61500	1.02512e-07
61600	9.66152e-08
61700	9.7239e-08
61800	9.96487e-08
61900	1.01967e-07
62000	9.83707e-08
62100	9.44773e-08
62200	9.71812e-08
62300	9.35147e-08
62400	9.55635e-08
62500	9.83852e-08
62600	9.53651e-08
62700	9.31291e-08
62800	9.57441e-08
62900	9.5915e-08
63000	9.92908e-08
63100	1.016e-07
63200	9.72601e-08
63300	9.14807e-08
63400	9.52781e-08
63500	9.32549e-08
63600	1.00051e-07
63700	9.67609e-08
63800	9.46463e-08
63900	9.95572e-08
64000	1.02881e-07
64100	9.85387e-08
64200	1.01615e-07
64300	1.04931e-07
64400	9.86356e-08
64500	9.71712e-08
64600	9.56553e-08
64700	9.5085e-08
64800	9.5992e-08
64900	9.99565e-08
65000	9.3906e-08
65100	8.85775e-08
65200	9.40694e-08
65300	9.87616e-08
65400	8.99966e-08
65500	9.52414e-08
65600	9.90137e-08
65700	1.01125e-07
65800	1.01871e-07
65900	9.66074e-08
66000	1.05931e-07
66100	1.0124e-07
66200	1.06013e-07
66300	1.03154e-07
66400	9.55298e-08
66500	9.76858e-08
66600	9.72485e-08
66700	1.01908e-07
66800	1.00672e-07
66900	1.00282e-07
67000	1.14719e-07
67100	1.41077e-07
67200	1.8636e-07
67300	2.13502e-07
67400	1.92018e-07
67500	1.34882e-07
67600	1.03824e-07
67700	1.12415e-07
67800	1.70625e-07
67900	2.48909e-07
68000	4.1934e-07
68100	6.55599e-07
68200	1.00871e-06
68300	8.00316e-06
68400	8.16959e-06
68500	4.05911e-06
68600	1.06195e-06
68700	4.61702e-07
68800	1.70961e-07
68900	1.47559e-07
69000	1.22345e-07
69100	1.01867e-07
69200	1.14086e-07
69300	1.26727e-07
69400	1.2161e-07
69500	1.20182e-07
69600	1.07291e-07
69700	9.37146e-08
69800	9.30406e-08
69900	8.87364e-08
70000	9.82945e-08
70100	1.20541e-07
70200	1.16614e-07
70300	9.84594e-08
70400	9.63506e-08
70500	9.26364e-08
70600	9.29374e-08
70700	9.89011e-08
70800	1.03918e-07
70900	1.00426e-07
71000	9.9929e-08
71100	1.02997e-07
71200	1.01838e-07
71300	9.26002e-08
71400	9.37376e-08
71500	9.4694e-08
71600	9.27364e-08
71700	9.73411e-08
71800	9.5985e-08
71900	9.51174e-08
72000	9.61309e-08
72100	9.86322e-08
72200	9.43795e-08
72300	9.17726e-08
72400	9.26639e-08
72500	1.02946e-07
72600	1.04486e-07
72700	1.00161e-07
72800	9.76442e-08
72900	9.64347e-08
73000	1.00324e-07
73100	9.64909e-08
73200	9.66965e-08
73300	9.61162e-08
73400	9.36442e-08
73500	8.90321e-08
73600	9.7315e-08
73700	1.01406e-07
73800	9.4342e-08
73900	9.78639e-08
74000	9.38968e-08
74100	8.83905e-08
74200	9.47966e-08
74300	9.62071e-08
74400	9.14516e-08
74500	9.29846e-08
74600	9.14719e-08
74700	8.77986e-08
74800	8.85289e-08
74900	9.11703e-08
75000	9.26176e-08
75100	8.95096e-08
75200	9.44549e-08
75300	9.07482e-08
75400	8.69917e-08
75500	9.11022e-08
75600	9.4458e-08
75700	9.30672e-08
75800	9.30727e-08
75900	9.36212e-08
76000	9.01405e-08
76100	8.48861e-08
76200	8.971e-08
76300	9.18971e-08
76400	8.66453e-08
76500	8.48722e-08
76600	8.43437e-08
76700	9.29532e-08
76800	8.96386e-08
76900	9.31157e-08
77000	9.35668e-08
77100	8.81243e-08
77200	9.31941e-08
77300	9.71363e-08
77400	9.56216e-08
77500	9.60539e-08
77600	9.88602e-08
77700	9.6347e-08
77800	9.64321e-08
77900	8.99765e-08
78000	8.32264e-08
78100	8.81139e-08
78200	9.39858e-08
78300	9.56805e-08
78400	9.23265e-08
78500	9.10671e-08
78600	9.56672e-08
78700	9.50346e-08
78800	9.50465e-08
78900	9.28989e-08
79000	9.14253e-08
79100	8.35653e-08
79200	8.85733e-08
79300	1.00477e-07
79400	9.10808e-08
79500	9.3527e-08
79600	9.32051e-08
79700	8.54678e-08
79800	9.20032e-08
79900	9.55574e-08
80000	9.4245e-08
80100	8.65866e-08
80200	8.93492e-08
80300	9.46834e-08
80400	9.29226e-08
80500	9.45431e-08
80600	9.7639e-08
80700	9.4303e-08
80800	9.30267e-08
80900	8.98005e-08
81000	9.16398e-08
81100	9.42551e-08
81200	8.8357e-08
81300	9.1166e-08
81400	9.07058e-08
81500	8.71297e-08
81600	9.44142e-08
81700	8.49205e-08
81800	8.14207e-08
81900	9.10093e-08
82000	9.01478e-08
82100	9.92933e-08
82200	9.36566e-08
82300	8.71745e-08
82400	9.0239e-08
82500	9.33121e-08
82600	8.95959e-08
82700	8.81555e-08
82800	9.49794e-08
82900	9.82695e-08
83000	9.85482e-08
83100	9.35471e-08
83200	9.40605e-08
83300	9.62853e-08
83400	9.34754e-08
83500	9.56526e-08
83600	9.23218e-08
83700	8.74042e-08
83800	8.37483e-08
83900	8.95725e-08
84000	9.16434e-08
84100	8.52622e-08
84200	8.59399e-08
84300	9.24826e-08
84400	8.75609e-08
84500	8.95467e-08
84600	8.98825e-08
84700	9.08466e-08
84800	9.44772e-08
84900	9.85799e-08
85000	9.94572e-08
85100	9.56967e-08
85200	9.16071e-08
85300	9.16158e-08
85400	9.06158e-08
85500	9.1818e-08
85600	9.62737e-08
85700	9.72991e-08
85800	8.99004e-08
85900	9.29092e-08
86000	9.51652e-08
86100	8.96348e-08
86200	9.42789e-08
86300	9.48717e-08
86400	9.4244e-08
86500	8.73484e-08
86600	8.35009e-08
86700	8.62914e-08
86800	9.0813e-08
86900	9.26193e-08
87000	9.35675e-08
87100	9.37182e-08
87200	8.78187e-08
87300	9.00295e-08
87400	9.60603e-08
87500	9.38164e-08
87600	9.3963e-08
87700	9.33196e-08
87800	9.6792e-08
87900	8.90264e-08
88000	8.39111e-08
88100	8.77672e-08
88200	9.09461e-08
88300	9.42502e-08
88400	8.70894e-08
88500	8.37638e-08
88600	9.03917e-08
88700	9.00572e-08
88800	8.73466e-08
88900	8.30122e-08
89000	8.46206e-08
89100	9.67404e-08
89200	9.64663e-08
89300	9.48893e-08
89400	9.48032e-08
89500	9.46863e-08
89600	8.75302e-08
89700	8.79203e-08
89800	8.99326e-08
89900	9.12542e-08
90000	9.68438e-08
90100	8.91184e-08
90200	8.31128e-08
90300	8.62686e-08
90400	8.86258e-08
90500	9.014e-08
90600	8.99799e-08
90700	9.05283e-08
90800	9.02201e-08
90900	8.50835e-08
91000	8.87226e-08
91100	9.42201e-08
91200	8.61131e-08
91300	8.41458e-08
91400	9.03924e-08
91500	9.08745e-08
91600	9.21897e-08
91700	8.89215e-08
91800	8.59084e-08
91900	8.5991e-08
92000	8.61222e-08
92100	9.03858e-08
92200	8.88915e-08
92300	8.90338e-08
92400	9.24518e-08
92500	8.45763e-08
92600	8.11711e-08
92700	8.91724e-08
92800	8.93853e-08
92900	8.74862e-08
93000	8.6831e-08
93100	8.59641e-08
93200	8.9225e-08
93300	9.8513e-08
93400	9.40805e-08
93500	9.34544e-08
93600	8.82982e-08
93700	8.67804e-08
93800	8.4338e-08
93900	8.85581e-08
94000	8.74888e-08
94100	8.69478e-08
94200	9.44831e-08
94300	8.75482e-08
94400	8.61952e-08
94500	8.29617e-08
94600	8.42864e-08
94700	8.46373e-08
94800	8.36027e-08
94900	8.73328e-08
95000	8.12606e-08
95100	8.47104e-08
95200	8.11399e-08
95300	8.09579e-08
95400	8.52319e-08
95500	8.99833e-08
95600	8.84795e-08
95700	8.39453e-08
95800	8.7064e-08
95900	8.91783e-08
96000	9.29176e-08
96100	8.46934e-08
96200	8.41557e-08
96300	8.75619e-08
96400	8.78277e-08
96500	8.48841e-08
96600	8.46223e-08
96700	8.82062e-08
96800	8.1349e-08
96900	8.01975e-08
97000	8.55316e-08
97100	8.03365e-08
97200	8.31749e-08
97300	8.50959e-08
97400	7.6249e-08
97500	7.74896e-08
97600	8.87914e-08
97700	8.98492e-08
97800	8.14165e-08
97900	8.22238e-08
98000	9.23746e-08
98100	8.74803e-08
98200	7.58679e-08
98300	7.79919e-08
98400	8.07757e-08
98500	8.11397e-08
98600	8.25993e-08
98700	8.71105e-08
98800	8.29368e-08
98900	7.68565e-08
99000	8.32732e-08
99100	8.26703e-08
99200	8.28567e-08
99300	8.16862e-08
99400	8.58048e-08
99500	8.93171e-08
99600	8.74186e-08
99700	8.58754e-08
99800	8.72678e-08
99900	8.60966e-08
100000	8.71358e-08
100100	9.07784e-08
100200	9.01652e-08
100300	9.34317e-08
100400	9.0702e-08
100500	8.56856e-08
100600	8.04012e-08
100700	8.16147e-08
100800	8.5609e-08
100900	8.55655e-08
101000	9.56903e-08
101100	9.04833e-08
101200	8.57625e-08
101300	8.78923e-08
101400	8.96361e-08
101500	8.44864e-08
101600	8.30544e-08
101700	8.73231e-08
101800	9.10246e-08
101900	9.04363e-08
102000	8.77734e-08
102100	8.79085e-08
102200	8.69416e-08
102300	8.1307e-08
102400	8.40597e-08
102500	9.13719e-08
102600	9.46911e-08
102700	9.38745e-08
102800	9.2311e-08
102900	9.42021e-08
103000	8.61249e-08
103100	8.30159e-08
103200	8.41313e-08
103300	8.0013e-08
103400	8.11687e-08
103500	8.65904e-08
103600	8.59735e-08
103700	8.66475e-08
103800	7.94459e-08
103900	8.45727e-08
104000	9.2515e-08
104100	8.82238e-08
104200	8.61923e-08
104300	7.98055e-08
104400	8.90343e-08
104500	8.04622e-08
104600	8.54945e-08
104700	9.10278e-08
104800	8.76789e-08
104900	8.4045e-08
105000	8.36872e-08
105100	7.99128e-08
105200	7.83026e-08
105300	7.99412e-08
105400	8.60356e-08
105500	8.25507e-08
105600	8.27399e-08
105700	8.4138e-08
105800	8.54226e-08
105900	8.12718e-08
106000	7.99224e-08
106100	9.09153e-08
106200	8.70717e-08
106300	8.71745e-08
106400	8.12159e-08
106500	7.47299e-08
106600	7.85738e-08
106700	8.27571e-08
106800	8.57176e-08
106900	8.81455e-08
107000	8.68595e-08
107100	9.14675e-08
107200	8.78087e-08
107300	7.9374e-08
107400	7.79751e-08
107500	7.48579e-08
107600	7.65346e-08
107700	8.0684e-08
107800	7.96799e-08
107900	8.44734e-08
108000	8.44845e-08
108100	8.23569e-08
108200	8.32931e-08
108300	8.28022e-08
108400	8.26469e-08
108500	7.84385e-08
108600	7.88617e-08
108700	7.74367e-08
108800	7.91935e-08
108900	8.22431e-08
109000	8.38327e-08
109100	8.27444e-08
109200	8.39187e-08
109300	8.21916e-08
109400	7.99806e-08
109500	7.51922e-08
109600	7.91946e-08
109700	8.66936e-08
109800	8.57544e-08
109900	8.3985e-08
110000	7.83814e-08
110100	8.36554e-08
110200	8.20923e-08
110300	8.2801e-08
110400	8.28629e-08
110500	7.69508e-08
110600	7.89923e-08
110700	7.9915e-08
110800	8.3395e-08
110900	8.4739e-08
111000	8.41016e-08
111100	8.25755e-08
111200	8.2052e-08
111300	8.41014e-08
111400	8.09696e-08
111500	8.37048e-08
111600	8.69553e-08
111700	8.26089e-08
111800	8.32393e-08
111900	8.35216e-08
112000	8.00638e-08
112100	8.17366e-08
112200	8.13818e-08
112300	8.54509e-08
112400	8.36346e-08
112500	8.23722e-08
112600	8.12739e-08
112700	7.90358e-08
112800	8.14358e-08
112900	7.72116e-08
113000	7.50469e-08
113100	7.95174e-08
113200	8.05706e-08
113300	7.53018e-08
113400	7.56944e-08
113500	7.74849e-08
113600	7.56517e-08
113700	7.6364e-08
113800	7.95035e-08
113900	8.09961e-08
114000	8.15471e-08
114100	8.22374e-08
114200	8.25528e-08
114300	7.92629e-08
114400	7.47652e-08
114500	7.66096e-08
114600	8.34472e-08
114700	8.25026e-08
114800	7.75555e-08
114900	7.81822e-08
115000	7.46301e-08
115100	7.93273e-08
115200	7.9248e-08
115300	7.56172e-08
115400	8.10758e-08
115500	8.22326e-08
115600	8.02994e-08
115700	8.00113e-08
115800	7.42826e-08
115900	7.28851e-08
116000	7.45782e-08
116100	8.2514e-08
116200	8.48287e-08
116300	7.95576e-08
116400	8.06601e-08
116500	8.16723e-08
116600	7.5103e-08
116700	7.6833e-08
116800	7.8828e-08
116900	7.73831e-08
117000	8.04914e-08
117100	8.10199e-08
117200	7.97111e-08
117300	7.88613e-08
117400	7.52343e-08
117500	7.64064e-08
117600	7.05608e-08
117700	7.228e-08
117800	7.24571e-08
117900	7.60617e-08
118000	7.49685e-08
118100	7.92792e-08
118200	8.3467e-08
118300	8.72371e-08
118400	7.71959e-08
118500	8.12609e-08
118600	8.03618e-08
118700	7.76162e-08
118800	8.17261e-08
118900	8.09936e-08
119000	8.06138e-08
119100	7.72805e-08
119200	7.24266e-08
119300	7.23367e-08
119400	7.54675e-08
119500	7.41503e-08
119600	7.71287e-08
119700	7.96021e-08
119800	7.60102e-08
119900	7.69819e-08
120000	7.73951e-08
120100	7.59905e-08
120200	7.32955e-08
120300	8.03786e-08
120400	8.03926e-08
120500	7.93147e-08
120600	7.75158e-08
120700	8.00154e-08
120800	8.47568e-08
120900	8.14862e-08
121000	7.9578e-08
121100	8.3905e-08
121200	8.00502e-08
121300	7.60378e-08
121400	7.08647e-08
121500	7.57041e-08
121600	7.63931e-08
121700	7.30673e-08
121800	7.43761e-08
121900	7.52216e-08
122000	7.53959e-08
122100	7.15405e-08
122200	7.45916e-08
122300	7.55775e-08
122400	7.48339e-08
122500	8.27456e-08
122600	8.01062e-08
122700	7.8337e-08
122800	8.0215e-08
122900	7.59712e-08
123000	7.57295e-08
123100	7.69553e-08
123200	7.52873e-08
123300	7.15144e-08
123400	7.25531e-08
123500	7.45452e-08
123600	7.71244e-08
123700	7.60758e-08
123800	7.82189e-08
123900	7.99906e-08
124000	7.65184e-08
124100	7.62067e-08
124200	7.55487e-08
124300	7.90016e-08
124400	7.75106e-08
124500	7.62468e-08
124600	7.70768e-08
124700	7.84119e-08
124800	7.50565e-08
124900	7.31774e-08
125000	8.23617e-08
125100	7.91101e-08
125200	8.19974e-08
125300	7.92855e-08
125400	7.15392e-08
125500	7.17614e-08
125600	7.08444e-08
125700	7.52064e-08
125800	7.92802e-08
125900	8.11089e-08
126000	7.7084e-08
126100	7.22045e-08
126200	7.41565e-08
126300	7.67427e-08
126400	7.70401e-08
126500	7.64284e-08
126600	8.09883e-08
126700	7.95906e-08
126800	7.18037e-08
126900	7.29609e-08
127000	7.4809e-08
127100	7.55275e-08
127200	7.4602e-08
127300	7.44926e-08
127400	7.58919e-08
127500	7.00286e-08
127600	7.15669e-08
127700	7.6971e-08
127800	7.5647e-08
127900	7.3865e-08
128000	6.88384e-08
128100	7.55495e-08
128200	7.84101e-08
128300	7.95058e-08
128400	8.19799e-08
128500	7.73488e-08
128600	8.06224e-08
128700	7.79972e-08
128800	7.36851e-08
128900	7.47016e-08
129000	7.24026e-08
129100	7.2976e-08
129200	7.56205e-08
129300	7.47518e-08
129400	7.29985e-08
129500	7.01131e-08
129600	7.40486e-08
129700	7.4474e-08
129800	7.42074e-08
129900	7.63278e-08
130000	7.23568e-08
130100	7.35632e-08
130200	7.53795e-08
130300	7.83452e-08
130400	7.14993e-08
130500	7.50833e-08
130600	7.7314e-08
130700	7.22347e-08
130800	7.56533e-08
130900	7.46822e-08
131000	7.27923e-08
131100	7.60795e-08
131200	7.31702e-08
131300	7.21965e-08
131400	7.04247e-08
131500	7.46158e-08
131600	7.66235e-08
131700	7.82556e-08
131800	7.9313e-08
131900	7.5173e-08
132000	7.66005e-08
132100	7.51007e-08
132200	7.67347e-08
132300	7.1375e-08
132400	7.1194e-08
132500	7.19695e-08
132600	7.77038e-08
132700	7.00858e-08
132800	7.09004e-08
132900	7.26598e-08
133000	7.08506e-08
133100	7.571e-08
133200	6.97597e-08
133300	6.65679e-08
133400	6.96513e-08
133500	7.23253e-08
133600	7.09535e-08
133700	7.62397e-08
133800	7.35022e-08
133900	7.31405e-08
134000	7.1886e-08
134100	7.07579e-08
134200	6.86877e-08
134300	7.41678e-08
134400	7.15636e-08
134500	6.89283e-08
134600	7.15801e-08
134700	6.91744e-08
134800	6.75776e-08
134900	7.42103e-08
135000	7.33159e-08
135100	7.61631e-08
135200	7.66876e-08
135300	7.39132e-08
135400	7.68725e-08
135500	7.67307e-08
135600	7.50068e-08
135700	7.08984e-08
135800	7.20429e-08
135900	7.51031e-08
136000	7.61695e-08
136100	7.80776e-08
136200	7.82361e-08
136300	7.50065e-08
136400	7.54396e-08
136500	7.12367e-08
136600	7.13086e-08
136700	7.07814e-08
136800	7.14843e-08
136900	7.3255e-08
137000	7.04175e-08
137100	7.35499e-08
137200	7.35898e-08
137300	7.14295e-08
137400	7.31528e-08
137500	7.14609e-08
137600	7.39848e-08
137700	7.4023e-08
137800	6.81049e-08
137900	6.37233e-08
138000	6.89353e-08
138100	7.16693e-08
138200	7.05064e-08
138300	6.94013e-08
138400	7.45105e-08
138500	7.58081e-08
138600	7.41302e-08
138700	7.28339e-08
138800	6.99219e-08
138900	6.73808e-08
139000	7.00706e-08
139100	7.1556e-08
139200	7.11976e-08
139300	7.08574e-08
139400	6.96982e-08
139500	6.97899e-08
139600	7.15396e-08
139700	6.92927e-08
139800	6.89751e-08
139900	7.7083e-08
140000	7.36727e-08
140100	7.30592e-08
140200	7.13823e-08
140300	6.99694e-08
140400	6.34683e-08
140500	6.9087e-08
140600	6.99448e-08
140700	7.57619e-08
140800	7.57757e-08
140900	7.04565e-08
141000	7.36175e-08
141100	7.09097e-08
141200	7.29335e-08
141300	7.41009e-08
141400	7.187e-08
141500	7.10127e-08
141600	7.67753e-08
141700	7.03931e-08
141800	6.98215e-08
141900	6.75589e-08
142000	6.75619e-08
142100	7.21226e-08
142200	7.41095e-08
142300	7.37718e-08
142400	7.06154e-08
142500	6.97286e-08
142600	6.98107e-08
142700	6.95848e-08
142800	7.45865e-08
142900	7.05803e-08
143000	6.86782e-08
143100	7.00991e-08
143200	7.23159e-08
143300	7.20994e-08
143400	6.98609e-08
143500	6.70483e-08
143600	7.44533e-08
143700	7.26481e-08
143800	6.61743e-08
143900	6.53541e-08
144000	6.71632e-08
144100	6.7945e-08
144200	7.36315e-08
144300	7.40933e-08
144400	6.88049e-08
144500	6.89813e-08
144600	7.09064e-08
144700	6.85287e-08
144800	7.15707e-08
144900	7.41481e-08
145000	6.91593e-08
145100	6.36379e-08
145200	7.32105e-08
145300	7.10411e-08
145400	6.65568e-08
145500	7.15295e-08
145600	7.04383e-08
145700	7.02225e-08
145800	6.99627e-08
145900	7.26841e-08
146000	6.60403e-08
146100	6.4174e-08
146200	6.31185e-08
146300	7.04419e-08
146400	6.56715e-08
146500	6.26832e-08
146600	6.55486e-08
146700	6.91799e-08
146800	6.49709e-08
146900	6.86533e-08
147000	7.22146e-08
147100	7.39342e-08
147200	7.16384e-08
147300	7.15303e-08
147400	6.86743e-08
147500	6.6918e-08
147600	6.81043e-08
147700	6.94701e-08
147800	6.81969e-08
147900	6.39896e-08
148000	6.42104e-08
148100	6.28444e-08
148200	6.42794e-08
148300	6.62158e-08
148400	6.85566e-08
148500	6.72758e-08
148600	6.53465e-08
148700	6.88272e-08
148800	6.76843e-08
148900	6.86379e-08
149000	6.88735e-08
149100	6.49857e-08
149200	6.51292e-08
149300	6.78106e-08
149400	6.92068e-08
149500	6.8156e-08
149600	6.62371e-08
149700	6.62802e-08
149800	6.58348e-08
149900	6.50136e-08
150000	6.82961e-08
150100	7.10817e-08
150200	6.90484e-08
150300	7.23503e-08
150400	7.28762e-08
150500	7.32587e-08
150600	6.40054e-08
150700	6.23073e-08
150800	7.34107e-08
150900	7.18282e-08
151000	6.17568e-08
151100	5.82289e-08
151200	6.51342e-08
151300	7.01142e-08
151400	7.5328e-08
151500	7.34337e-08
151600	6.8528e-08
151700	6.44939e-08
151800	6.28293e-08
151900	6.2882e-08
152000	6.84896e-08
152100	7.18077e-08
152200	6.77773e-08
152300	6.60764e-08
152400	6.42944e-08
152500	7.02581e-08
152600	6.60497e-08
152700	6.22572e-08
152800	6.32664e-08
152900	6.36531e-08
153000	6.52355e-08
153100	6.79791e-08
153200	7.23039e-08
153300	6.60904e-08
153400	6.28962e-08
153500	6.3773e-08
153600	7.00443e-08
153700	7.47058e-08
153800	7.20995e-08
153900	6.56135e-08
154000	6.43858e-08
154100	6.72944e-08
154200	6.51131e-08
154300	6.21334e-08
154400	5.7927e-08
154500	6.06152e-08
154600	6.68379e-08
154700	6.9965e-08
154800	6.73828e-08
154900	6.49194e-08
155000	6.25623e-08
155100	5.88511e-08
155200	6.3719e-08
155300	6.85979e-08
155400	6.71057e-08
155500	6.33585e-08
155600	5.89348e-08
155700	6.4452e-08
155800	6.53213e-08
155900	6.34845e-08
156000	6.8785e-08
156100	6.41366e-08
156200	6.6052e-08
156300	6.44227e-08
156400	6.99724e-08
156500	7.02912e-08
156600	6.49249e-08
156700	6.3912e-08
156800	6.11153e-08
156900	6.1553e-08
157000	6.45896e-08
157100	6.62695e-08
157200	6.8146e-08
157300	6.23623e-08
157400	6.11425e-08
157500	5.87738e-08
157600	6.09894e-08
157700	5.93302e-08
157800	6.41194e-08
157900	6.66382e-08
158000	6.75692e-08
158100	6.76528e-08
158200	6.10743e-08
158300	6.37123e-08
158400	6.78999e-08
158500	6.71928e-08
158600	6.20678e-08
158700	6.53182e-08
158800	6.6946e-08
158900	6.25284e-08
159000	6.03791e-08
159100	6.59301e-08
159200	6.19296e-08
159300	6.29846e-08
159400	6.61636e-08
159500	6.64455e-08
159600	6.75767e-08
159700	6.5998e-08
159800	6.28387e-08
159900	5.91612e-08
160000	5.94576e-08
160100	6.58058e-08
160200	6.60178e-08
160300	6.99769e-08
160400	6.75634e-08
160500	6.27953e-08
160600	6.408e-08
160700	6.4868e-08
160800	6.46377e-08
160900	6.49938e-08
161000	6.32808e-08
161100	6.09005e-08
161200	6.56955e-08
161300	6.36231e-08
161400	6.47572e-08
161500	6.68065e-08
161600	6.47939e-08
161700	6.1722e-08
161800	6.06161e-08
161900	6.18737e-08
162000	6.63973e-08
162100	6.44148e-08
162200	6.07529e-08
162300	6.23078e-08
162400	6.61085e-08
162500	6.54701e-08
162600	6.04759e-08
162700	5.73251e-08
162800	6.13678e-08
162900	6.32736e-08
163000	6.5337e-08
163100	6.69281e-08
163200	6.57154e-08
163300	6.48938e-08
163400	6.05568e-08
163500	5.93113e-08
163600	6.23874e-08
163700	6.32115e-08
163800	6.53509e-08
163900	6.16392e-08
164000	5.87774e-08
164100	5.70998e-08
164200	6.01893e-08
164300	6.16684e-08
164400	5.97433e-08
164500	5.82637e-08
164600	6.67017e-08
164700	6.34208e-08
164800	6.26824e-08
164900	6.24525e-08
165000	6.21723e-08
165100	6.21629e-08
165200	6.20557e-08
165300	6.30045e-08
165400	6.47295e-08
165500	6.24939e-08
165600	6.06641e-08
165700	5.94992e-08
165800	6.17611e-08
165900	6.51093e-08
166000	6.11299e-08
166100	6.46545e-08
166200	6.16729e-08
166300	6.59574e-08
166400	6.75758e-08
166500	6.68858e-08
166600	6.54418e-08
166700	6.12179e-08
166800	6.24468e-08
166900	6.24622e-08
167000	6.3654e-08
167100	6.5474e-08
167200	6.15611e-08
167300	6.2333e-08
167400	6.13618e-08
167500	5.90092e-08
167600	5.95817e-08
167700	6.32671e-08
167800	6.31429e-08
167900	6.18518e-08
168000	5.86789e-08
168100	6.20068e-08
168200	5.73834e-08
168300	5.92153e-08
168400	6.63948e-08
168500	6.28755e-08
168600	6.10931e-08
168700	6.2746e-08
168800	6.14333e-08
168900	6.28332e-08
169000	6.43008e-08
169100	6.05023e-08
169200	6.03311e-08
169300	6.0595e-08
169400	5.99447e-08
169500	6.00712e-08
169600	6.32471e-08
169700	6.68267e-08
169800	6.73429e-08
169900	6.60248e-08
170000	6.28752e-08
170100	5.69775e-08
170200	5.86596e-08
170300	6.24362e-08
170400	6.08981e-08
170500	6.15382e-08
170600	5.67545e-08
170700	5.85914e-08
170800	5.68863e-08
170900	5.95339e-08
171000	6.40905e-08
171100	6.48331e-08
171200	6.16208e-08
171300	5.78407e-08
171400	5.82528e-08
171500	6.18999e-08
171600	5.94737e-08
171700	5.65983e-08
171800	5.48785e-08
171900	5.99275e-08
172000	6.0896e-08
172100	5.77899e-08
172200	6.17397e-08
172300	6.02741e-08
172400	6.10874e-08
172500	6.09733e-08
172600	5.90231e-08
172700	5.90204e-08
172800	5.95469e-08
172900	5.98972e-08
173000	6.33638e-08
173100	6.28107e-08
173200	5.76043e-08
173300	5.78035e-08
173400	5.83123e-08
173500	6.31934e-08
173600	5.79804e-08
173700	5.73184e-08
173800	5.86585e-08
173900	5.63481e-08
174000	6.08778e-08
174100	5.9051e-08
174200	5.61143e-08
174300	5.77833e-08
174400	5.76441e-08
174500	5.97049e-08
174600	5.43601e-08
174700	5.62382e-08
174800	5.72563e-08
174900	6.21722e-08
175000	6.29637e-08
175100	6.11331e-08
175200	5.86772e-08
175300	6.03503e-08
175400	5.51166e-08
175500	5.67076e-08
175600	5.80293e-08
175700	5.81579e-08
175800	5.88373e-08
175900	5.72241e-08
176000	5.85909e-08
176100	5.62804e-08
176200	5.76755e-08
176300	6.18547e-08
176400	5.86161e-08
176500	5.8636e-08
176600	5.6022e-08
176700	5.78986e-08
176800	6.0529e-08
176900	5.99067e-08
177000	5.74663e-08
177100	5.93882e-08
177200	6.26937e-08
177300	5.8795e-08
177400	5.84183e-08
177500	6.11823e-08
177600	6.06319e-08
177700	6.2565e-08
177800	6.3132e-08
177900	5.78647e-08
178000	5.85973e-08
178100	5.80457e-08
178200	6.01306e-08
178300	6.36392e-08
178400	5.70868e-08
178500	5.4677e-08
178600	6.11612e-08
178700	6.08145e-08
178800	6.04284e-08
178900	5.94773e-08
179000	6.18073e-08
179100	6.26667e-08
179200	6.18016e-08
179300	6.08859e-08
179400	5.86813e-08
179500	6.01561e-08
179600	5.64715e-08
179700	5.50959e-08
179800	5.52431e-08
179900	5.82579e-08
180000	5.49107e-08
180100	5.6358e-08
180200	5.79971e-08
180300	5.52253e-08
180400	5.75542e-08
180500	5.90236e-08
180600	5.6327e-08
180700	6.07797e-08
180800	5.68506e-08
180900	5.11017e-08
181000	5.34936e-08
181100	5.56793e-08
181200	5.89051e-08
181300	5.86672e-08
181400	6.15091e-08
181500	5.88087e-08
181600	5.86279e-08
181700	5.98236e-08
181800	5.88378e-08
181900	5.96929e-08
182000	6.2001e-08
182100	6.23181e-08
182200	6.13158e-08
182300	5.72204e-08
182400	5.72741e-08
182500	5.79161e-08
182600	5.90221e-08
182700	5.78103e-08
182800	5.38398e-08
182900	5.42482e-08
183000	6.03942e-08
183100	6.20257e-08
183200	6.04173e-08
183300	5.59579e-08
183400	6.03261e-08
183500	5.83673e-08
183600	5.57947e-08
183700	5.71005e-08
183800	5.58862e-08
183900	5.11848e-08
184000	5.2729e-08
184100	5.22685e-08
184200	5.49889e-08
184300	6.02741e-08
184400	5.77865e-08
184500	5.27644e-08
184600	5.09676e-08
184700	5.27753e-08
184800	5.81946e-08
184900	5.95721e-08
185000	5.52201e-08
185100	5.41968e-08
185200	5.24192e-08
185300	5.65985e-08
185400	5.50137e-08
185500	5.17768e-08
185600	5.57619e-08
185700	5.71136e-08
185800	5.57657e-08
185900	5.24175e-08
186000	5.36126e-08
186100	5.4747e-08
186200	5.53382e-08
186300	5.49397e-08
186400	5.45891e-08
186500	5.4644e-08
186600	5.283e-08
186700	5.51411e-08
186800	5.6975e-08
186900	5.5371e-08
187000	5.40233e-08
187100	5.54639e-08
187200	5.27201e-08
187300	5.68858e-08
187400	5.37894e-08
187500	5.24597e-08
187600	5.67388e-08
187700	5.58019e-08
187800	5.44456e-08
187900	6.03704e-08
188000	5.65084e-08
188100	5.95269e-08
188200	5.80862e-08
188300	5.39241e-08
188400	5.05402e-08
188500	5.60009e-08
188600	5.78311e-08
188700	5.2294e-08
188800	5.64568e-08
188900	5.32905e-08
189000	5.21469e-08
189100	5.98126e-08
189200	5.86778e-08
189300	5.65071e-08
189400	5.83023e-08
189500	5.63224e-08
189600	5.31672e-08
189700	5.35741e-08
189800	5.43849e-08
189900	5.56797e-08
190000	5.3974e-08
190100	5.33589e-08
190200	5.7067e-08
190300	5.0805e-08
190400	5.26001e-08
190500	5.47315e-08
190600	5.39855e-08
190700	5.53811e-08
190800	5.39796e-08
190900	5.70946e-08
191000	5.42684e-08
191100	5.03912e-08
191200	5.82357e-08
191300	5.28962e-08
191400	5.09705e-08
191500	5.26755e-08
191600	5.56346e-08
191700	5.67574e-08
191800	5.25487e-08
191900	5.63021e-08
192000	5.95302e-08
192100	5.68198e-08
192200	5.54866e-08
192300	5.33593e-08
192400	5.65515e-08
192500	5.98675e-08
192600	5.74592e-08
192700	5.3377e-08
192800	5.32378e-08
192900	5.38735e-08
193000	5.29051e-08
193100	5.71569e-08
193200	5.50013e-08
193300	5.30726e-08
193400	5.13895e-08
193500	5.59316e-08
193600	5.49188e-08
193700	5.60563e-08
193800	5.23806e-08
193900	5.43078e-08
194000	5.46486e-08
194100	5.16125e-08
194200	5.3015e-08
194300	5.61968e-08
194400	5.35771e-08
194500	5.46698e-08
194600	5.61524e-08
194700	5.37509e-08
194800	5.33457e-08
194900	5.5958e-08
195000	5.40029e-08
195100	5.68238e-08
195200	5.30268e-08
195300	5.20906e-08
195400	5.35555e-08
195500	5.24415e-08
195600	5.48388e-08
195700	5.52121e-08
195800	5.48329e-08
195900	5.42395e-08
196000	5.42025e-08
196100	5.39427e-08
196200	5.05e-08
196300	5.2626e-08
196400	5.16815e-08
196500	5.48748e-08
196600	5.35709e-08
196700	5.53677e-08
196800	5.53684e-08
196900	5.46832e-08
197000	5.17082e-08
197100	4.97825e-08
197200	5.34146e-08
197300	5.47671e-08
197400	4.83153e-08
197500	4.94504e-08
197600	5.29389e-08
197700	5.00056e-08
197800	5.04821e-08
197900	5.14701e-08
198000	5.31967e-08
198100	5.49348e-08
198200	5.61289e-08
198300	5.03912e-08
198400	5.19738e-08
198500	5.55255e-08
198600	5.32617e-08
198700	4.77629e-08
198800	4.854e-08
198900	5.10919e-08
199000	5.15073e-08
199100	5.34671e-08
199200	5.10432e-08
199300	4.98373e-08
199400	5.07222e-08
199500	5.15285e-08
199600	5.32925e-08
199700	4.99616e-08
[truncated: 1,002 more rows]

## Sheet: Sheet8
Fig EXT 5h
freq (Hz)	Sv (arb.)
0	9.01133e-07
100	1.57353e-06
200	1.0507e-06
300	3.24296e-07
400	3.09388e-07
500	2.87695e-07
600	2.47697e-07
700	2.33002e-07
800	2.08289e-07
900	1.8868e-07
1000	1.83284e-07
1100	1.86856e-07
1200	1.74807e-07
1300	1.62179e-07
1400	1.64704e-07
1500	1.68483e-07
1600	1.68541e-07
1700	1.57174e-07
1800	1.57717e-07
1900	1.4141e-07
2000	1.54498e-07
2100	1.72953e-07
2200	1.50038e-07
2300	1.4956e-07
2400	1.58259e-07
2500	1.46678e-07
2600	1.43788e-07
2700	1.50445e-07
2800	1.38493e-07
2900	1.34583e-07
3000	1.34996e-07
3100	1.34944e-07
3200	1.36114e-07
3300	1.37918e-07
3400	1.34367e-07
3500	1.37278e-07
3600	1.30351e-07
3700	1.32041e-07
3800	1.34796e-07
3900	1.36979e-07
4000	1.37314e-07
4100	1.28099e-07
4200	1.34588e-07
4300	1.30655e-07
4400	1.36464e-07
4500	1.27514e-07
4600	1.19811e-07
4700	1.21956e-07
4800	1.19157e-07
4900	1.25012e-07
5000	1.30465e-07
5100	1.26789e-07
5200	1.18984e-07
5300	1.29877e-07
5400	1.24701e-07
5500	1.236e-07
5600	1.29189e-07
5700	1.1937e-07
5800	1.22362e-07
5900	1.23401e-07
6000	1.2229e-07
6100	1.19306e-07
6200	1.17619e-07
6300	1.17538e-07
6400	1.19795e-07
6500	1.22913e-07
6600	1.24498e-07
6700	1.25151e-07
6800	1.20392e-07
6900	1.23737e-07
7000	1.21953e-07
7100	1.20507e-07
7200	1.20077e-07
7300	1.24271e-07
7400	1.21734e-07
7500	1.21957e-07
7600	1.23674e-07
7700	1.13046e-07
7800	1.15782e-07
7900	1.18226e-07
8000	1.10168e-07
8100	1.10581e-07
8200	1.2398e-07
8300	1.28989e-07
8400	1.1777e-07
8500	1.06833e-07
8600	1.13282e-07
8700	1.27731e-07
8800	1.34449e-07
8900	1.27248e-07
9000	1.21845e-07
9100	1.19041e-07
9200	1.15106e-07
9300	1.2069e-07
9400	1.12832e-07
9500	1.13075e-07
9600	1.29401e-07
9700	1.25702e-07
9800	1.23987e-07
9900	1.23687e-07
10000	1.16786e-07
10100	1.17839e-07
10200	1.15885e-07
10300	1.10291e-07
10400	1.12598e-07
10500	1.18819e-07
10600	1.19103e-07
10700	1.20694e-07
10800	1.20368e-07
10900	1.13185e-07
11000	1.07953e-07
11100	1.06435e-07
11200	1.11207e-07
11300	1.15844e-07
11400	1.10105e-07
11500	1.15105e-07
11600	1.15778e-07
11700	1.16555e-07
11800	1.22732e-07
11900	1.1371e-07
12000	1.16789e-07
12100	1.14468e-07
12200	1.16817e-07
12300	1.22341e-07
12400	1.27786e-07
12500	1.15441e-07
12600	1.22331e-07
12700	1.23253e-07
12800	1.1814e-07
12900	1.2629e-07
13000	1.25574e-07
13100	1.27817e-07
13200	1.21331e-07
13300	1.10938e-07
13400	1.27423e-07
13500	1.2597e-07
13600	1.19933e-07
13700	1.18987e-07
13800	1.23507e-07
13900	1.12173e-07
14000	1.07286e-07
14100	1.07721e-07
14200	1.18625e-07
14300	1.22102e-07
14400	1.17682e-07
14500	1.24555e-07
14600	1.2159e-07
14700	1.0786e-07
14800	1.07863e-07
14900	1.15514e-07
15000	1.18086e-07
15100	1.11883e-07
15200	1.18072e-07
15300	1.18271e-07
15400	1.14738e-07
15500	1.12832e-07
15600	1.10512e-07
15700	1.08847e-07
15800	1.17949e-07
15900	1.29807e-07
16000	1.14971e-07
16100	1.09532e-07
16200	1.09839e-07
16300	1.08921e-07
16400	1.15127e-07
16500	1.15783e-07
16600	1.18704e-07
16700	1.17548e-07
16800	1.18464e-07
16900	1.1798e-07
17000	1.17062e-07
17100	1.17856e-07
17200	1.18483e-07
17300	1.12896e-07
17400	1.15354e-07
17500	1.15358e-07
17600	1.07536e-07
17700	1.08457e-07
17800	1.20417e-07
17900	1.21619e-07
18000	1.18512e-07
18100	1.17885e-07
18200	1.09966e-07
18300	1.11126e-07
18400	1.18621e-07
18500	1.14371e-07
18600	1.11596e-07
18700	1.16086e-07
18800	1.12987e-07
18900	1.13226e-07
19000	1.17466e-07
19100	1.15138e-07
19200	1.14583e-07
19300	1.09439e-07
19400	1.17749e-07
19500	1.1713e-07
19600	1.17742e-07
19700	1.14537e-07
19800	1.13067e-07
19900	1.19752e-07
20000	1.17943e-07
20100	1.06524e-07
20200	1.10214e-07
20300	1.13634e-07
20400	1.18745e-07
20500	1.16592e-07
20600	1.19914e-07
20700	1.19319e-07
20800	1.08269e-07
20900	1.12917e-07
21000	1.20793e-07
21100	1.19447e-07
21200	1.09832e-07
21300	1.07126e-07
21400	1.10356e-07
21500	1.11465e-07
21600	1.1472e-07
21700	1.17788e-07
21800	1.09414e-07
21900	1.11491e-07
22000	1.19752e-07
22100	1.11999e-07
22200	1.19295e-07
22300	1.20918e-07
22400	1.16947e-07
22500	1.1341e-07
22600	1.08567e-07
22700	1.1261e-07
22800	1.22271e-07
22900	1.12246e-07
23000	1.20945e-07
23100	1.12769e-07
23200	1.09815e-07
23300	1.0623e-07
23400	1.08364e-07
23500	1.18485e-07
23600	1.22856e-07
23700	1.16282e-07
23800	1.18927e-07
23900	1.18617e-07
24000	1.05196e-07
24100	1.11771e-07
24200	1.163e-07
24300	1.15826e-07
24400	1.20961e-07
24500	1.17837e-07
24600	1.09422e-07
24700	1.09496e-07
24800	1.13131e-07
24900	1.17281e-07
25000	1.20863e-07
25100	1.13204e-07
25200	1.04551e-07
25300	1.07843e-07
25400	1.1669e-07
25500	1.13685e-07
25600	1.07032e-07
25700	1.14324e-07
25800	1.15195e-07
25900	1.16126e-07
26000	1.14096e-07
26100	1.10902e-07
26200	1.09603e-07
26300	1.12139e-07
26400	1.09276e-07
26500	1.07805e-07
26600	1.16395e-07
26700	1.09791e-07
26800	1.11075e-07
26900	1.0476e-07
27000	1.12392e-07
27100	1.13773e-07
27200	1.14054e-07
27300	1.16661e-07
27400	1.14423e-07
27500	1.05378e-07
27600	1.09294e-07
27700	1.0955e-07
27800	1.10936e-07
27900	1.16655e-07
28000	1.16553e-07
28100	1.15274e-07
28200	1.11096e-07
28300	1.04184e-07
28400	1.08798e-07
28500	1.14204e-07
28600	1.14203e-07
28700	1.15503e-07
28800	1.06546e-07
28900	1.1297e-07
29000	1.15193e-07
29100	1.11785e-07
29200	1.10788e-07
29300	1.08417e-07
29400	1.06486e-07
29500	1.15383e-07
29600	1.15807e-07
29700	1.08245e-07
29800	1.1275e-07
29900	1.05465e-07
30000	1.13306e-07
30100	1.16962e-07
30200	1.18567e-07
30300	1.10342e-07
30400	1.10475e-07
30500	1.10029e-07
30600	1.0901e-07
30700	1.10787e-07
30800	1.14436e-07
30900	1.16248e-07
31000	1.13873e-07
31100	1.19296e-07
31200	1.14405e-07
31300	1.10314e-07
31400	1.11085e-07
31500	1.133e-07
31600	1.13557e-07
31700	1.02771e-07
31800	1.04203e-07
31900	1.13793e-07
32000	1.16243e-07
32100	1.12036e-07
32200	1.1076e-07
32300	1.1372e-07
32400	1.13945e-07
32500	1.11229e-07
32600	1.06307e-07
32700	1.02211e-07
32800	1.0355e-07
32900	1.06458e-07
33000	1.11111e-07
33100	1.11557e-07
33200	1.10844e-07
33300	1.06377e-07
33400	1.10343e-07
33500	1.13604e-07
33600	1.17137e-07
33700	1.15502e-07
33800	1.18712e-07
33900	1.14752e-07
34000	1.10642e-07
34100	1.10963e-07
34200	1.14514e-07
34300	1.13852e-07
34400	1.05666e-07
34500	1.02794e-07
34600	1.1061e-07
34700	1.0873e-07
34800	1.08416e-07
34900	1.11589e-07
35000	1.16447e-07
35100	1.17982e-07
35200	1.20695e-07
35300	1.21283e-07
35400	1.18357e-07
35500	1.16706e-07
35600	1.12041e-07
35700	1.05541e-07
35800	1.07679e-07
35900	1.10683e-07
36000	1.1115e-07
36100	1.06123e-07
36200	1.02842e-07
36300	1.13073e-07
36400	1.12088e-07
36500	1.0822e-07
36600	1.11657e-07
36700	1.0733e-07
36800	1.16231e-07
36900	1.09815e-07
37000	1.12827e-07
37100	1.21852e-07
37200	1.19496e-07
37300	1.13117e-07
37400	1.11511e-07
37500	1.13095e-07
37600	1.10876e-07
37700	1.11564e-07
37800	1.11192e-07
37900	1.15839e-07
38000	1.14465e-07
38100	1.15467e-07
38200	1.14895e-07
38300	1.13736e-07
38400	1.08827e-07
38500	1.11715e-07
38600	1.10664e-07
38700	1.0888e-07
38800	1.08884e-07
38900	1.08772e-07
39000	1.12952e-07
39100	1.13357e-07
39200	1.16157e-07
39300	1.16412e-07
39400	1.09602e-07
39500	1.12368e-07
39600	1.1386e-07
39700	1.16456e-07
39800	1.09526e-07
39900	9.779e-08
40000	9.86524e-08
40100	1.04869e-07
40200	1.0948e-07
40300	1.15528e-07
40400	1.09553e-07
40500	1.0062e-07
40600	1.10971e-07
40700	1.09654e-07
40800	1.07953e-07
40900	1.07184e-07
41000	1.08875e-07
41100	1.13529e-07
41200	1.16269e-07
41300	1.11987e-07
41400	1.12391e-07
41500	1.10283e-07
41600	1.06846e-07
41700	1.05395e-07
41800	1.04462e-07
41900	1.10652e-07
42000	1.10805e-07
42100	1.13766e-07
42200	1.09638e-07
42300	1.11719e-07
42400	1.10638e-07
42500	1.12262e-07
42600	1.06328e-07
42700	1.06793e-07
42800	1.08744e-07
42900	1.11417e-07
43000	1.1187e-07
43100	1.04857e-07
43200	1.15789e-07
43300	1.14345e-07
43400	1.13596e-07
43500	1.10728e-07
43600	1.12175e-07
43700	1.10957e-07
43800	1.08454e-07
43900	1.055e-07
44000	1.12378e-07
44100	1.17168e-07
44200	1.12479e-07
44300	1.11345e-07
44400	9.86206e-08
44500	1.02684e-07
44600	1.04475e-07
44700	1.05966e-07
44800	1.10848e-07
44900	1.04239e-07
45000	1.05574e-07
45100	1.14358e-07
45200	1.08647e-07
45300	1.1424e-07
45400	1.25284e-07
45500	1.16345e-07
45600	1.10457e-07
45700	1.13215e-07
45800	1.15898e-07
45900	1.08748e-07
46000	1.05589e-07
46100	1.05652e-07
46200	1.10285e-07
46300	1.09733e-07
46400	1.12263e-07
46500	1.13826e-07
46600	1.06781e-07
46700	1.04964e-07
46800	1.04008e-07
46900	1.0724e-07
47000	1.13355e-07
47100	1.15222e-07
47200	1.07762e-07
47300	1.15486e-07
47400	1.11677e-07
47500	1.06504e-07
47600	1.08617e-07
47700	1.06286e-07
47800	1.11452e-07
47900	1.09742e-07
48000	1.09087e-07
48100	9.92473e-08
48200	1.13599e-07
48300	1.1284e-07
48400	9.74886e-08
48500	1.0505e-07
48600	1.10668e-07
48700	1.20475e-07
48800	1.12585e-07
48900	1.04166e-07
49000	1.06368e-07
49100	1.07191e-07
49200	1.04464e-07
49300	1.01956e-07
49400	1.11584e-07
49500	1.11765e-07
49600	1.05355e-07
49700	1.0522e-07
49800	1.07065e-07
49900	1.02207e-07
50000	1.09157e-07
50100	1.07869e-07
50200	1.09334e-07
50300	1.10474e-07
50400	1.14485e-07
50500	1.19962e-07
50600	1.08266e-07
50700	1.13143e-07
50800	1.15843e-07
50900	1.23831e-07
51000	1.27111e-07
51100	1.1626e-07
51200	1.15852e-07
51300	1.10005e-07
51400	1.06797e-07
51500	1.22311e-07
51600	1.14163e-07
51700	1.09115e-07
51800	1.10225e-07
51900	1.12634e-07
52000	1.09826e-07
52100	1.14673e-07
52200	1.1195e-07
52300	1.16384e-07
52400	1.11754e-07
52500	1.06223e-07
52600	1.00645e-07
52700	1.03849e-07
52800	1.06574e-07
52900	1.11339e-07
53000	1.07441e-07
53100	1.03059e-07
53200	1.04663e-07
53300	1.09036e-07
53400	1.05204e-07
53500	1.01485e-07
53600	1.10045e-07
53700	1.04482e-07
53800	1.02733e-07
53900	1.04778e-07
54000	1.00268e-07
54100	9.77493e-08
54200	1.00863e-07
54300	1.03783e-07
54400	1.05902e-07
54500	1.05806e-07
54600	1.09988e-07
54700	1.10889e-07
54800	1.13393e-07
54900	1.1658e-07
55000	1.12563e-07
55100	1.08864e-07
55200	9.96274e-08
55300	1.03694e-07
55400	1.00635e-07
55500	1.01437e-07
55600	9.86816e-08
55700	1.03868e-07
55800	1.08093e-07
55900	1.02899e-07
56000	1.04506e-07
56100	1.10433e-07
56200	1.11196e-07
56300	1.0242e-07
56400	9.61802e-08
56500	9.95719e-08
56600	1.03398e-07
56700	1.0579e-07
56800	1.02656e-07
56900	9.97085e-08
57000	1.02303e-07
57100	1.04002e-07
57200	1.05643e-07
57300	1.07523e-07
57400	1.0016e-07
57500	1.00235e-07
57600	1.01442e-07
57700	1.114e-07
57800	1.06138e-07
57900	9.52651e-08
58000	9.96432e-08
58100	1.10742e-07
58200	1.13727e-07
58300	1.09753e-07
58400	1.05457e-07
58500	1.00555e-07
58600	9.92096e-08
58700	1.10972e-07
58800	1.1208e-07
58900	1.09622e-07
59000	1.07133e-07
59100	1.04165e-07
59200	1.12421e-07
59300	1.09564e-07
59400	1.00217e-07
59500	9.96666e-08
59600	1.05188e-07
59700	1.04063e-07
59800	1.08017e-07
59900	1.12181e-07
60000	1.11979e-07
60100	1.02858e-07
60200	1.00374e-07
60300	9.92381e-08
60400	9.68276e-08
60500	1.03177e-07
60600	1.06352e-07
60700	1.01297e-07
60800	1.02515e-07
60900	1.03496e-07
61000	9.68631e-08
61100	9.62597e-08
61200	1.03516e-07
61300	1.06035e-07
61400	1.01984e-07
61500	9.92041e-08
61600	1.01281e-07
61700	1.01971e-07
61800	1.01874e-07
61900	1.03985e-07
62000	1.13015e-07
62100	1.05324e-07
62200	9.72689e-08
62300	1.06957e-07
62400	1.12698e-07
62500	1.05863e-07
62600	1.10279e-07
62700	1.13733e-07
62800	1.14354e-07
62900	1.10872e-07
63000	1.04242e-07
63100	9.89763e-08
63200	1.04386e-07
63300	1.01432e-07
63400	1.00948e-07
63500	1.12776e-07
63600	1.105e-07
63700	1.04133e-07
63800	1.04628e-07
63900	1.03613e-07
64000	1.01352e-07
64100	1.04162e-07
64200	9.87179e-08
64300	1.01337e-07
64400	1.05606e-07
64500	1.04163e-07
64600	1.08307e-07
64700	1.00776e-07
64800	1.03283e-07
64900	1.08403e-07
65000	1.08664e-07
65100	1.05317e-07
65200	1.10796e-07
65300	1.12253e-07
65400	1.08e-07
65500	1.06352e-07
65600	1.00571e-07
65700	9.75551e-08
65800	1.03137e-07
65900	1.03764e-07
66000	1.10369e-07
66100	1.12753e-07
66200	1.10494e-07
66300	1.12538e-07
66400	1.05482e-07
66500	1.05197e-07
66600	1.03614e-07
66700	1.12588e-07
66800	1.15354e-07
66900	1.09505e-07
67000	1.23201e-07
67100	1.5074e-07
67200	2.06855e-07
67300	2.31755e-07
67400	1.81923e-07
67500	1.44066e-07
67600	1.10435e-07
67700	1.04472e-07
67800	1.82611e-07
67900	2.67123e-07
68000	3.70039e-07
68100	6.31088e-07
68200	8.86785e-07
68300	8.07201e-06
68400	8.87182e-06
68500	4.12277e-06
68600	1.11416e-06
68700	5.58869e-07
68800	1.99586e-07
68900	1.61977e-07
69000	1.34256e-07
69100	1.14111e-07
69200	1.37507e-07
69300	1.45121e-07
69400	1.43354e-07
69500	1.14952e-07
69600	1.1216e-07
69700	1.15081e-07
69800	1.17322e-07
69900	1.0892e-07
70000	1.04237e-07
70100	1.19617e-07
70200	1.16271e-07
70300	1.09361e-07
70400	9.57997e-08
70500	9.28781e-08
70600	1.00596e-07
70700	1.01329e-07
70800	9.90657e-08
70900	9.5108e-08
71000	9.87454e-08
71100	9.90092e-08
71200	1.08835e-07
71300	1.02167e-07
71400	1.03047e-07
71500	1.06086e-07
71600	9.91446e-08
71700	9.37402e-08
71800	9.62631e-08
71900	1.0609e-07
72000	1.03981e-07
72100	9.79611e-08
72200	1.06685e-07
72300	1.02579e-07
72400	9.78629e-08
72500	1.00167e-07
72600	9.44463e-08
72700	9.8465e-08
72800	1.01548e-07
72900	9.6691e-08
73000	9.67009e-08
73100	9.51539e-08
73200	8.63416e-08
73300	9.30838e-08
73400	9.91327e-08
73500	9.52316e-08
73600	1.02597e-07
73700	9.96222e-08
73800	1.01166e-07
73900	1.04298e-07
74000	1.00148e-07
74100	9.70292e-08
74200	9.93167e-08
74300	9.97039e-08
74400	1.00228e-07
74500	1.06192e-07
74600	9.89126e-08
74700	1.03531e-07
74800	1.06513e-07
74900	9.85768e-08
75000	1.02566e-07
75100	1.00985e-07
75200	1.03808e-07
75300	1.07087e-07
75400	1.06168e-07
75500	9.86889e-08
75600	9.78882e-08
75700	9.80501e-08
75800	1.0383e-07
75900	1.06659e-07
76000	1.06195e-07
76100	1.08403e-07
76200	1.13098e-07
76300	1.01401e-07
76400	9.70398e-08
76500	9.8034e-08
76600	9.80847e-08
76700	9.62662e-08
76800	9.39984e-08
76900	9.51634e-08
77000	9.77435e-08
77100	1.00783e-07
77200	1.02341e-07
77300	1.06556e-07
77400	1.07193e-07
77500	9.90558e-08
77600	9.60621e-08
77700	9.22287e-08
77800	9.19525e-08
77900	9.64877e-08
78000	9.68498e-08
78100	9.6655e-08
78200	9.29639e-08
78300	9.6505e-08
78400	1.04267e-07
78500	1.06702e-07
78600	1.03419e-07
78700	1.02925e-07
78800	9.6422e-08
78900	9.54891e-08
79000	9.77968e-08
79100	9.27714e-08
79200	1.0307e-07
79300	1.06479e-07
79400	1.00231e-07
79500	9.67262e-08
79600	1.02019e-07
79700	1.03794e-07
79800	1.03871e-07
79900	1.03005e-07
80000	9.90171e-08
80100	9.6077e-08
80200	9.63957e-08
80300	9.55108e-08
80400	9.1356e-08
80500	9.1357e-08
80600	9.3163e-08
80700	1.00718e-07
80800	1.03584e-07
80900	1.00277e-07
81000	1.0295e-07
81100	1.02846e-07
81200	1.02291e-07
81300	1.06146e-07
81400	9.97306e-08
81500	1.00536e-07
81600	1.02193e-07
81700	1.01152e-07
81800	9.65352e-08
81900	9.3847e-08
82000	9.72465e-08
82100	9.46139e-08
82200	9.23394e-08
82300	9.51206e-08
82400	1.00127e-07
82500	1.04257e-07
82600	1.0616e-07
82700	9.65373e-08
82800	9.63066e-08
82900	9.8353e-08
83000	9.94502e-08
83100	9.2145e-08
83200	9.80366e-08
83300	1.05056e-07
83400	1.01306e-07
83500	1.01009e-07
83600	1.01071e-07
83700	1.00123e-07
83800	9.77972e-08
83900	9.22254e-08
84000	9.82e-08
84100	9.34968e-08
84200	8.91902e-08
84300	9.83647e-08
84400	9.28255e-08
84500	9.52376e-08
84600	9.50332e-08
84700	8.93967e-08
84800	8.63337e-08
84900	9.7322e-08
85000	1.05346e-07
85100	1.02739e-07
85200	9.73858e-08
85300	1.02432e-07
85400	1.05708e-07
85500	9.81334e-08
85600	1.04078e-07
85700	9.77327e-08
85800	9.77833e-08
85900	9.96455e-08
86000	9.36242e-08
86100	9.51073e-08
86200	9.95192e-08
86300	1.00392e-07
86400	9.48806e-08
86500	9.77264e-08
86600	9.8861e-08
86700	8.95357e-08
86800	9.75278e-08
86900	1.00735e-07
87000	9.30624e-08
87100	9.43463e-08
87200	9.35263e-08
87300	9.42597e-08
87400	9.24446e-08
87500	9.61972e-08
87600	9.7771e-08
87700	9.54829e-08
87800	9.43823e-08
87900	9.72167e-08
88000	1.0271e-07
88100	9.84114e-08
88200	9.7805e-08
88300	9.68087e-08
88400	1.01781e-07
88500	1.07913e-07
88600	1.06788e-07
88700	9.96065e-08
88800	1.01176e-07
88900	9.27015e-08
89000	8.91961e-08
89100	9.62822e-08
89200	9.85398e-08
89300	9.74614e-08
89400	9.54411e-08
89500	9.56958e-08
89600	9.79022e-08
89700	9.81715e-08
89800	9.17851e-08
89900	9.75516e-08
90000	1.0004e-07
90100	9.14493e-08
90200	9.09708e-08
90300	1.02397e-07
90400	9.62151e-08
90500	9.21367e-08
90600	9.00338e-08
90700	8.84215e-08
90800	8.5956e-08
90900	9.37526e-08
91000	9.9471e-08
91100	1.02588e-07
91200	9.48485e-08
91300	9.59055e-08
91400	9.70918e-08
91500	9.13204e-08
91600	9.139e-08
91700	1.02616e-07
91800	1.03139e-07
91900	9.43985e-08
92000	9.67423e-08
92100	1.00852e-07
92200	8.93141e-08
92300	8.63771e-08
92400	8.86777e-08
92500	9.12093e-08
92600	9.2131e-08
92700	9.28936e-08
92800	9.12709e-08
92900	9.51626e-08
93000	9.22634e-08
93100	8.99915e-08
93200	9.03216e-08
93300	8.42624e-08
93400	8.57513e-08
93500	9.30777e-08
93600	9.57886e-08
93700	8.17642e-08
93800	8.53468e-08
93900	9.43897e-08
94000	9.44991e-08
94100	9.34375e-08
94200	9.39529e-08
94300	9.50809e-08
94400	1.00167e-07
94500	9.7384e-08
94600	9.29928e-08
94700	9.31859e-08
94800	9.25309e-08
94900	8.90135e-08
95000	9.32432e-08
95100	9.45394e-08
95200	9.30317e-08
95300	9.80545e-08
95400	9.78011e-08
95500	9.65847e-08
95600	9.61258e-08
95700	9.25041e-08
95800	9.21117e-08
95900	9.24356e-08
96000	9.06425e-08
96100	9.06856e-08
96200	9.47237e-08
96300	9.52005e-08
96400	9.35883e-08
96500	8.90527e-08
96600	8.98444e-08
96700	9.43495e-08
96800	9.8665e-08
96900	9.45863e-08
97000	8.9472e-08
97100	9.19231e-08
97200	9.15564e-08
97300	9.13203e-08
97400	9.28069e-08
97500	9.44336e-08
97600	8.89765e-08
97700	8.90253e-08
97800	9.67656e-08
97900	9.53851e-08
98000	9.34106e-08
98100	8.95398e-08
98200	9.04061e-08
98300	8.98749e-08
98400	8.9538e-08
98500	9.43924e-08
98600	8.8527e-08
98700	8.89234e-08
98800	9.39774e-08
98900	9.64068e-08
99000	9.23384e-08
99100	9.56872e-08
99200	1.01773e-07
99300	9.70159e-08
99400	9.55539e-08
99500	9.02308e-08
99600	8.83357e-08
99700	9.30315e-08
99800	9.30084e-08
99900	9.68644e-08
100000	9.86227e-08
100100	1.02624e-07
100200	9.36345e-08
100300	8.71016e-08
100400	9.07409e-08
100500	9.74079e-08
100600	9.44685e-08
100700	9.20287e-08
100800	8.27922e-08
100900	9.57303e-08
101000	9.52285e-08
101100	9.30333e-08
101200	8.9351e-08
101300	9.25847e-08
101400	9.25865e-08
101500	9.0251e-08
101600	1.00179e-07
101700	1.0245e-07
101800	1.00728e-07
101900	9.87838e-08
102000	9.6151e-08
102100	9.84568e-08
102200	9.78479e-08
102300	9.40338e-08
102400	9.72729e-08
102500	1.00055e-07
102600	9.70489e-08
102700	9.1483e-08
102800	8.94711e-08
102900	9.88497e-08
103000	9.83759e-08
103100	9.45495e-08
103200	9.86891e-08
103300	9.80307e-08
103400	9.7183e-08
103500	9.01301e-08
103600	9.12088e-08
103700	9.13887e-08
103800	8.86127e-08
103900	8.96748e-08
104000	9.22351e-08
104100	9.06535e-08
104200	8.02035e-08
104300	8.34926e-08
104400	9.43639e-08
104500	9.90047e-08
104600	9.45387e-08
104700	9.85181e-08
104800	9.37201e-08
104900	9.00785e-08
105000	8.71376e-08
105100	8.63344e-08
105200	9.02143e-08
105300	9.43993e-08
105400	9.09555e-08
105500	9.13258e-08
105600	9.28461e-08
105700	9.15198e-08
105800	8.49378e-08
105900	8.35518e-08
106000	8.91099e-08
106100	9.08117e-08
106200	9.01571e-08
106300	8.60955e-08
106400	8.24172e-08
106500	8.44995e-08
106600	9.11539e-08
106700	9.52653e-08
106800	9.28965e-08
106900	8.61813e-08
107000	9.01109e-08
107100	9.21664e-08
107200	8.76029e-08
107300	8.44336e-08
107400	9.02212e-08
107500	9.01075e-08
107600	8.53956e-08
107700	8.83967e-08
107800	8.72936e-08
107900	8.99304e-08
108000	8.81732e-08
108100	9.04084e-08
108200	9.10132e-08
108300	8.21354e-08
108400	8.34364e-08
108500	8.18197e-08
108600	9.31728e-08
108700	9.11865e-08
108800	8.50652e-08
108900	8.95265e-08
109000	9.02807e-08
109100	8.33319e-08
109200	8.18821e-08
109300	8.27941e-08
109400	8.36801e-08
109500	8.66112e-08
109600	8.72423e-08
109700	8.1474e-08
109800	8.61821e-08
109900	8.89336e-08
110000	8.46638e-08
110100	8.74506e-08
110200	9.00441e-08
110300	8.76449e-08
110400	8.71705e-08
110500	9.03926e-08
110600	9.20795e-08
110700	8.87072e-08
110800	8.4325e-08
110900	8.74206e-08
111000	9.42558e-08
111100	8.82619e-08
111200	8.44082e-08
111300	7.99822e-08
111400	8.74272e-08
111500	8.88127e-08
111600	8.60029e-08
111700	8.22217e-08
111800	8.95019e-08
111900	8.82306e-08
112000	9.26082e-08
112100	9.28997e-08
112200	8.44019e-08
112300	8.15668e-08
112400	8.81152e-08
112500	8.72614e-08
112600	8.77539e-08
112700	8.88138e-08
112800	8.24098e-08
112900	8.53109e-08
113000	8.49059e-08
113100	8.43615e-08
113200	8.60344e-08
113300	8.0717e-08
113400	7.94712e-08
113500	8.08014e-08
113600	8.97086e-08
113700	8.75573e-08
113800	8.03806e-08
113900	8.88717e-08
114000	9.35495e-08
114100	9.22181e-08
114200	9.28058e-08
114300	8.58107e-08
114400	8.51277e-08
114500	8.43571e-08
114600	8.97952e-08
114700	8.9278e-08
114800	8.55178e-08
114900	8.58791e-08
115000	8.6214e-08
115100	8.4764e-08
115200	8.17946e-08
115300	9.02424e-08
115400	8.00825e-08
115500	8.28703e-08
115600	8.74492e-08
115700	8.62656e-08
115800	8.14353e-08
115900	7.94096e-08
116000	8.87924e-08
116100	9.01491e-08
116200	8.12243e-08
116300	8.45994e-08
116400	8.34908e-08
116500	7.96328e-08
116600	8.28323e-08
116700	8.6249e-08
116800	8.46898e-08
116900	8.72836e-08
117000	8.24279e-08
117100	8.34934e-08
117200	8.35475e-08
117300	8.86958e-08
117400	8.71104e-08
117500	7.66421e-08
117600	7.56026e-08
117700	7.89493e-08
117800	8.05661e-08
117900	8.20366e-08
118000	8.13722e-08
118100	8.27822e-08
118200	8.46459e-08
118300	8.17638e-08
118400	7.98874e-08
118500	8.26186e-08
118600	8.06906e-08
118700	8.89802e-08
118800	8.97385e-08
118900	8.23156e-08
119000	8.16405e-08
119100	8.38194e-08
119200	8.32473e-08
119300	8.59007e-08
119400	8.05774e-08
119500	8.05107e-08
119600	8.44215e-08
119700	8.28762e-08
119800	7.92186e-08
119900	7.91576e-08
120000	7.779e-08
120100	7.55066e-08
120200	8.08437e-08
120300	8.52338e-08
120400	8.11441e-08
120500	8.02547e-08
120600	8.45808e-08
120700	8.97619e-08
120800	8.79313e-08
120900	8.2196e-08
121000	8.78666e-08
121100	8.94019e-08
121200	8.48696e-08
121300	7.91731e-08
121400	8.3418e-08
121500	8.85809e-08
121600	8.47324e-08
121700	7.93345e-08
121800	7.86167e-08
121900	7.91133e-08
122000	7.76776e-08
122100	7.82757e-08
122200	8.47409e-08
122300	8.79857e-08
122400	8.61613e-08
122500	8.74969e-08
122600	8.57873e-08
122700	8.50183e-08
122800	8.4751e-08
122900	8.85689e-08
123000	7.93306e-08
123100	7.77631e-08
123200	8.84524e-08
123300	7.90617e-08
123400	7.99407e-08
123500	7.47972e-08
123600	7.9324e-08
123700	8.82341e-08
123800	8.48621e-08
123900	8.45587e-08
124000	8.17156e-08
124100	7.95502e-08
124200	7.82766e-08
124300	7.74665e-08
124400	8.07442e-08
124500	8.09611e-08
124600	8.03543e-08
124700	8.3577e-08
124800	8.27281e-08
124900	8.12302e-08
125000	8.29232e-08
125100	8.56551e-08
125200	8.73821e-08
125300	8.6219e-08
125400	8.30108e-08
125500	8.24116e-08
125600	8.04185e-08
125700	7.5538e-08
125800	8.0053e-08
125900	8.36741e-08
126000	8.29979e-08
126100	8.28401e-08
126200	8.53044e-08
126300	8.65173e-08
126400	8.73073e-08
126500	8.4701e-08
126600	7.72426e-08
126700	8.12371e-08
126800	8.1749e-08
126900	8.0049e-08
127000	7.68941e-08
127100	7.77754e-08
127200	8.30868e-08
127300	8.0607e-08
127400	7.58839e-08
127500	7.86844e-08
127600	7.94217e-08
127700	8.12996e-08
127800	8.47185e-08
127900	8.04986e-08
128000	8.47456e-08
128100	8.4231e-08
128200	7.94583e-08
128300	8.21661e-08
128400	8.08442e-08
128500	7.85273e-08
128600	7.53854e-08
128700	8.2888e-08
128800	8.33616e-08
128900	7.55325e-08
129000	7.79457e-08
129100	8.144e-08
129200	8.44454e-08
129300	8.15539e-08
129400	7.86364e-08
129500	7.59751e-08
129600	8.46615e-08
129700	7.91063e-08
129800	8.06583e-08
129900	8.20602e-08
130000	8.25295e-08
130100	8.44358e-08
130200	8.48013e-08
130300	7.90904e-08
130400	8.1777e-08
130500	7.34953e-08
130600	7.42016e-08
130700	7.65238e-08
130800	7.57039e-08
130900	7.53499e-08
131000	8.22886e-08
131100	8.73955e-08
131200	8.23573e-08
131300	7.80936e-08
131400	7.56656e-08
131500	7.22396e-08
131600	8.12058e-08
131700	8.1867e-08
131800	8.29151e-08
131900	7.80211e-08
132000	7.70396e-08
132100	7.79698e-08
132200	8.43976e-08
132300	8.02412e-08
132400	7.4116e-08
132500	7.78744e-08
132600	8.33405e-08
132700	7.68882e-08
132800	8.07531e-08
132900	7.6152e-08
133000	7.40618e-08
133100	7.38152e-08
133200	7.27113e-08
133300	7.76648e-08
133400	7.43169e-08
133500	7.57278e-08
133600	8.07825e-08
133700	8.67182e-08
133800	8.55773e-08
133900	7.70581e-08
134000	7.26997e-08
134100	7.32236e-08
134200	7.70175e-08
134300	7.64424e-08
134400	7.38109e-08
134500	7.32808e-08
134600	7.54192e-08
134700	8.19889e-08
134800	8.17974e-08
134900	7.7359e-08
135000	7.9976e-08
135100	7.90831e-08
135200	8.49467e-08
135300	8.2165e-08
135400	8.15022e-08
135500	8.01227e-08
135600	7.63596e-08
135700	7.85504e-08
135800	7.88373e-08
135900	7.74623e-08
136000	7.74589e-08
136100	8.38156e-08
136200	8.08907e-08
136300	7.46979e-08
136400	7.177e-08
136500	7.10062e-08
136600	7.11058e-08
136700	7.41801e-08
136800	7.95537e-08
136900	7.83562e-08
137000	8.33279e-08
137100	7.81506e-08
137200	7.341e-08
137300	7.26908e-08
137400	7.59636e-08
137500	8.01904e-08
137600	8.10411e-08
137700	8.0424e-08
137800	7.75198e-08
137900	7.67834e-08
138000	7.81979e-08
138100	8.13888e-08
138200	7.67811e-08
138300	7.86222e-08
138400	7.73458e-08
138500	7.34234e-08
138600	7.95494e-08
138700	8.30936e-08
138800	8.3584e-08
138900	8.25031e-08
139000	7.43152e-08
139100	7.48935e-08
139200	7.60644e-08
139300	7.54853e-08
139400	7.54558e-08
139500	7.30848e-08
139600	7.79239e-08
139700	8.61077e-08
139800	7.79832e-08
139900	7.28945e-08
140000	7.50647e-08
140100	7.98029e-08
140200	7.67169e-08
140300	7.62162e-08
140400	8.23559e-08
140500	7.97543e-08
140600	7.58443e-08
140700	7.8606e-08
140800	8.02943e-08
140900	8.06048e-08
141000	7.62586e-08
141100	6.81218e-08
141200	7.3349e-08
141300	7.37728e-08
141400	8.16519e-08
141500	8.23072e-08
141600	7.61694e-08
141700	8.24402e-08
141800	8.46562e-08
141900	7.60102e-08
142000	7.2688e-08
142100	8.1257e-08
142200	8.09702e-08
142300	7.6598e-08
142400	7.89297e-08
142500	7.81868e-08
142600	7.5211e-08
142700	7.32915e-08
142800	7.85895e-08
142900	8.37742e-08
143000	7.52046e-08
143100	7.11293e-08
143200	7.47427e-08
143300	7.56338e-08
143400	7.31299e-08
143500	7.69943e-08
143600	7.91299e-08
143700	7.77455e-08
143800	7.78703e-08
143900	7.47478e-08
144000	7.46845e-08
144100	7.40711e-08
144200	7.1871e-08
144300	7.29275e-08
144400	7.55599e-08
144500	7.63272e-08
144600	7.21045e-08
144700	7.56583e-08
144800	8.3077e-08
144900	7.80628e-08
145000	7.29626e-08
145100	6.81905e-08
145200	7.30829e-08
145300	7.75588e-08
145400	7.51599e-08
145500	7.63825e-08
145600	7.25803e-08
145700	7.60116e-08
145800	7.90415e-08
145900	7.7741e-08
146000	7.26031e-08
146100	7.28755e-08
146200	7.41664e-08
146300	7.58577e-08
146400	7.82324e-08
146500	7.49135e-08
146600	7.71255e-08
146700	7.37442e-08
146800	7.49047e-08
146900	7.71e-08
147000	7.52565e-08
147100	7.57606e-08
147200	7.62956e-08
147300	7.55758e-08
147400	7.5475e-08
147500	8.10247e-08
147600	7.72438e-08
147700	7.59048e-08
147800	7.32092e-08
147900	6.99316e-08
148000	7.37188e-08
148100	7.13372e-08
148200	6.55466e-08
148300	6.44557e-08
148400	6.74712e-08
148500	7.34749e-08
148600	7.3867e-08
148700	7.2264e-08
148800	6.59076e-08
148900	7.17901e-08
149000	7.16778e-08
149100	6.94012e-08
149200	7.24143e-08
149300	7.31859e-08
149400	7.86998e-08
149500	7.23244e-08
149600	7.23987e-08
149700	6.87842e-08
149800	6.74054e-08
149900	7.26858e-08
150000	7.55065e-08
150100	7.60566e-08
150200	7.19712e-08
150300	7.29377e-08
150400	6.9001e-08
150500	6.71223e-08
150600	7.47414e-08
150700	7.35593e-08
150800	7.1186e-08
150900	7.41408e-08
151000	7.27083e-08
151100	7.24625e-08
151200	7.31805e-08
151300	6.8506e-08
151400	7.15993e-08
151500	7.31511e-08
151600	7.45723e-08
151700	7.32661e-08
151800	6.91763e-08
151900	7.30167e-08
152000	7.36109e-08
152100	6.9325e-08
152200	7.20721e-08
152300	7.75095e-08
152400	7.63018e-08
152500	7.11548e-08
152600	7.08462e-08
152700	7.09974e-08
152800	7.09511e-08
152900	7.53942e-08
153000	6.98687e-08
153100	6.83956e-08
153200	7.42758e-08
153300	7.15479e-08
153400	6.87736e-08
153500	7.51053e-08
153600	7.21219e-08
153700	7.08967e-08
153800	7.16833e-08
153900	6.82656e-08
154000	6.48441e-08
154100	6.67529e-08
154200	6.38634e-08
154300	6.56347e-08
154400	7.16017e-08
154500	7.05958e-08
154600	7.42971e-08
154700	7.13275e-08
154800	7.01074e-08
154900	7.17677e-08
155000	7.04193e-08
155100	7.09596e-08
155200	6.961e-08
155300	6.8828e-08
155400	6.95131e-08
155500	7.1398e-08
155600	7.04752e-08
155700	6.79471e-08
155800	6.88376e-08
155900	6.65626e-08
156000	6.96633e-08
156100	7.36835e-08
156200	7.23078e-08
156300	7.37142e-08
156400	7.28665e-08
156500	7.63546e-08
156600	7.31432e-08
156700	7.08005e-08
156800	6.67717e-08
156900	6.41189e-08
157000	6.70961e-08
157100	6.75812e-08
157200	7.18316e-08
157300	6.65412e-08
157400	6.44342e-08
157500	7.27951e-08
157600	7.2839e-08
157700	7.46071e-08
157800	6.85247e-08
157900	6.59348e-08
158000	6.70135e-08
158100	6.97723e-08
158200	7.01011e-08
158300	6.78531e-08
158400	6.39649e-08
158500	6.68706e-08
158600	7.2133e-08
158700	7.34374e-08
158800	6.75864e-08
158900	7.12254e-08
159000	7.07438e-08
159100	6.82376e-08
159200	6.60988e-08
159300	6.85742e-08
159400	7.30888e-08
159500	7.11085e-08
159600	7.0179e-08
159700	7.35527e-08
159800	6.95843e-08
159900	6.83118e-08
160000	7.22099e-08
160100	6.79553e-08
160200	6.76528e-08
160300	6.92963e-08
160400	6.6069e-08
160500	6.6014e-08
160600	6.3939e-08
160700	6.87638e-08
160800	6.90833e-08
160900	7.38465e-08
161000	7.29694e-08
161100	6.63853e-08
161200	6.83575e-08
161300	7.31232e-08
161400	7.59643e-08
161500	7.14268e-08
161600	6.80676e-08
161700	6.792e-08
161800	6.75651e-08
161900	6.80134e-08
162000	7.12742e-08
162100	6.84485e-08
162200	6.38803e-08
162300	6.78893e-08
162400	6.85785e-08
162500	6.79109e-08
162600	6.60029e-08
162700	6.87499e-08
162800	7.22368e-08
162900	6.83689e-08
163000	7.18256e-08
163100	7.36044e-08
163200	7.37226e-08
163300	7.10704e-08
163400	7.1497e-08
163500	6.60797e-08
163600	6.9824e-08
163700	7.18041e-08
163800	7.1485e-08
163900	7.0288e-08
164000	7.23752e-08
164100	7.11188e-08
164200	7.24047e-08
164300	6.73138e-08
164400	6.48461e-08
164500	6.7611e-08
164600	6.63499e-08
164700	6.80223e-08
164800	6.91013e-08
164900	6.59782e-08
165000	6.74281e-08
165100	6.66309e-08
165200	7.07957e-08
165300	6.78287e-08
165400	6.64618e-08
165500	6.8991e-08
165600	6.83204e-08
165700	6.87686e-08
165800	7.00122e-08
165900	7.11925e-08
166000	6.83614e-08
166100	6.77351e-08
166200	7.26586e-08
166300	6.79105e-08
166400	6.77429e-08
166500	6.98176e-08
166600	6.72807e-08
166700	6.78508e-08
166800	6.86282e-08
166900	6.60368e-08
167000	6.35241e-08
167100	6.80271e-08
167200	6.55164e-08
167300	6.57906e-08
167400	6.62523e-08
167500	6.78796e-08
167600	6.91484e-08
167700	6.89568e-08
167800	6.97395e-08
167900	6.91136e-08
168000	7.16645e-08
168100	7.05187e-08
168200	6.53056e-08
168300	6.75902e-08
168400	6.46781e-08
168500	6.6432e-08
168600	6.64635e-08
168700	6.24363e-08
168800	6.44207e-08
168900	7.04102e-08
169000	6.76764e-08
169100	7.00246e-08
169200	6.79098e-08
169300	6.91365e-08
169400	7.10526e-08
169500	7.23271e-08
169600	7.57554e-08
169700	7.20461e-08
169800	7.24371e-08
169900	7.39644e-08
170000	6.50943e-08
170100	6.11686e-08
170200	6.4587e-08
170300	6.65733e-08
170400	6.77912e-08
170500	6.97747e-08
170600	6.86091e-08
170700	6.69385e-08
170800	6.25785e-08
170900	6.30232e-08
171000	6.66998e-08
171100	6.56421e-08
171200	6.47525e-08
171300	6.90253e-08
171400	7.41446e-08
171500	6.91622e-08
171600	5.98876e-08
171700	6.52983e-08
171800	6.85283e-08
171900	6.89427e-08
172000	7.1197e-08
172100	6.68002e-08
172200	6.42348e-08
172300	6.38372e-08
172400	6.70072e-08
172500	6.89867e-08
172600	6.44405e-08
172700	6.44981e-08
172800	6.3238e-08
172900	6.70097e-08
173000	6.57064e-08
173100	6.32996e-08
173200	6.85652e-08
173300	6.8761e-08
173400	6.44929e-08
173500	6.17226e-08
173600	6.20113e-08
173700	6.59975e-08
173800	6.02346e-08
173900	6.41123e-08
174000	6.76049e-08
174100	6.64462e-08
174200	6.46885e-08
174300	6.75695e-08
174400	6.60342e-08
174500	6.95953e-08
174600	6.83457e-08
174700	6.70791e-08
174800	6.84821e-08
174900	7.05648e-08
175000	7.29321e-08
175100	6.53484e-08
175200	6.44739e-08
175300	6.5716e-08
175400	6.3319e-08
175500	6.19772e-08
175600	6.26303e-08
175700	6.35982e-08
175800	6.29404e-08
175900	6.31988e-08
176000	6.55495e-08
176100	6.17041e-08
176200	6.15179e-08
176300	6.26679e-08
176400	6.16551e-08
176500	6.30886e-08
176600	5.96446e-08
176700	6.2167e-08
176800	5.95304e-08
176900	6.49562e-08
177000	6.41527e-08
177100	6.78998e-08
177200	6.81719e-08
177300	6.53435e-08
177400	6.51469e-08
177500	6.23969e-08
177600	6.23109e-08
177700	6.50092e-08
177800	6.57781e-08
177900	6.97275e-08
178000	6.70525e-08
178100	6.25774e-08
178200	6.25496e-08
178300	6.36579e-08
178400	6.60026e-08
178500	6.38947e-08
178600	6.42673e-08
178700	5.99895e-08
178800	6.07651e-08
178900	6.55972e-08
179000	6.71348e-08
179100	6.6441e-08
179200	6.09998e-08
179300	5.9666e-08
179400	6.81886e-08
179500	6.41062e-08
179600	6.03248e-08
179700	6.1708e-08
179800	5.93963e-08
179900	6.02139e-08
180000	7.03309e-08
180100	6.26412e-08
180200	6.36137e-08
180300	6.57098e-08
180400	5.87725e-08
180500	6.38018e-08
180600	6.09515e-08
180700	6.10823e-08
180800	6.11663e-08
180900	6.5838e-08
181000	6.49877e-08
181100	6.09379e-08
181200	6.41251e-08
181300	6.76072e-08
181400	6.47962e-08
181500	6.35765e-08
181600	6.39304e-08
181700	6.25337e-08
181800	6.02161e-08
181900	5.97488e-08
182000	6.13556e-08
182100	6.23954e-08
182200	6.18547e-08
182300	6.06324e-08
182400	6.07389e-08
182500	6.32924e-08
182600	6.3258e-08
182700	6.24372e-08
182800	6.41324e-08
182900	6.54852e-08
183000	6.81671e-08
183100	6.47402e-08
183200	6.0825e-08
183300	6.16187e-08
183400	6.68232e-08
183500	6.29552e-08
183600	6.06772e-08
183700	6.33729e-08
183800	5.99652e-08
183900	6.20739e-08
184000	6.58489e-08
184100	6.2895e-08
184200	6.4704e-08
184300	6.1452e-08
184400	6.12776e-08
184500	6.56191e-08
184600	5.80576e-08
184700	5.92246e-08
184800	5.89837e-08
184900	5.85161e-08
185000	6.07823e-08
185100	6.76187e-08
185200	6.37699e-08
185300	6.24537e-08
185400	6.38172e-08
185500	6.38902e-08
185600	6.19522e-08
185700	6.27234e-08
185800	6.19251e-08
185900	6.47267e-08
186000	6.35512e-08
186100	6.2656e-08
186200	6.48906e-08
186300	6.70946e-08
186400	6.18164e-08
186500	5.96698e-08
186600	5.91905e-08
186700	6.03317e-08
186800	6.11517e-08
186900	6.11051e-08
187000	6.24173e-08
187100	6.82475e-08
187200	7.00579e-08
187300	6.54283e-08
187400	6.01428e-08
187500	6.11009e-08
187600	6.09556e-08
187700	6.08079e-08
187800	5.57363e-08
187900	6.01674e-08
188000	6.05758e-08
188100	5.6855e-08
188200	5.71994e-08
188300	5.58197e-08
188400	5.87789e-08
188500	6.11766e-08
188600	5.91307e-08
188700	6.06666e-08
188800	5.90865e-08
188900	6.22718e-08
189000	5.92673e-08
189100	5.89176e-08
189200	6.19191e-08
189300	5.79611e-08
189400	6.1725e-08
189500	6.73304e-08
189600	6.84898e-08
189700	6.45944e-08
189800	6.36747e-08
189900	6.18226e-08
190000	6.23527e-08
190100	6.07893e-08
190200	5.98084e-08
190300	6.21638e-08
190400	5.81538e-08
190500	6.07315e-08
190600	6.03692e-08
190700	5.9102e-08
190800	5.93086e-08
190900	6.00888e-08
191000	5.89657e-08
191100	5.77971e-08
191200	5.56396e-08
191300	5.75371e-08
191400	5.91385e-08
191500	5.9399e-08
191600	6.04112e-08
191700	6.13326e-08
191800	6.09714e-08
191900	6.31578e-08
192000	6.01278e-08
192100	5.6231e-08
192200	6.22415e-08
192300	6.35639e-08
192400	6.29497e-08
192500	5.65929e-08
192600	5.47635e-08
192700	5.79736e-08
192800	6.04078e-08
192900	6.26348e-08
193000	6.27617e-08
193100	6.11387e-08
193200	6.20941e-08
193300	6.1071e-08
193400	5.76366e-08
193500	5.52738e-08
193600	5.88558e-08
193700	6.15195e-08
193800	6.03719e-08
193900	6.33475e-08
194000	6.19439e-08
194100	6.20945e-08
194200	5.91183e-08
194300	5.68712e-08
194400	5.65283e-08
194500	5.83107e-08
194600	5.72901e-08
194700	5.52188e-08
194800	6.01898e-08
194900	6.27598e-08
195000	5.97749e-08
195100	6.01219e-08
195200	5.49396e-08
195300	5.78139e-08
195400	6.08259e-08
195500	5.80486e-08
195600	5.67025e-08
195700	6.10737e-08
195800	6.52595e-08
195900	5.98056e-08
196000	5.8687e-08
196100	5.82203e-08
196200	5.92077e-08
196300	5.88063e-08
196400	5.68886e-08
196500	5.68453e-08
196600	6.04511e-08
196700	6.08753e-08
196800	6.18378e-08
196900	6.40666e-08
197000	5.85192e-08
197100	5.61267e-08
197200	5.82578e-08
197300	5.70306e-08
197400	5.67777e-08
197500	5.55299e-08
197600	5.65445e-08
197700	5.34524e-08
197800	5.88319e-08
197900	6.05536e-08
198000	5.79729e-08
198100	5.43146e-08
198200	5.68639e-08
198300	6.08623e-08
198400	6.42766e-08
198500	6.32076e-08
198600	6.32528e-08
198700	6.18187e-08
198800	6.22915e-08
198900	5.81684e-08
199000	6.00159e-08
199100	6.29918e-08
199200	5.91289e-08
199300	5.79064e-08
199400	5.71085e-08
199500	5.31928e-08
199600	5.63664e-08
199700	5.79108e-08
[truncated: 1,002 more rows]

## Sheet: Sheet9
Fig EXT 5i
freq (Hz)	Sv (arb.)
0	1.69098e-06
100	2.17479e-06
200	1.24114e-06
300	4.75489e-07
400	4.32693e-07
500	3.82319e-07
600	3.29105e-07
700	3.09853e-07
800	2.71822e-07
900	2.58763e-07
1000	2.68641e-07
1100	2.53968e-07
1200	2.30751e-07
1300	2.18562e-07
1400	2.22464e-07
1500	2.01455e-07
1600	2.05158e-07
1700	2.09431e-07
1800	1.99258e-07
1900	1.81004e-07
2000	1.87419e-07
2100	1.95639e-07
2200	1.74173e-07
2300	1.76144e-07
2400	1.83938e-07
2500	1.76853e-07
2600	1.72999e-07
2700	1.73925e-07
2800	1.70947e-07
2900	1.70918e-07
3000	1.65894e-07
3100	1.59711e-07
3200	1.7272e-07
3300	1.71119e-07
3400	1.51534e-07
3500	1.594e-07
3600	1.5596e-07
3700	1.59729e-07
3800	1.66333e-07
3900	1.62789e-07
4000	1.63355e-07
4100	1.54641e-07
4200	1.61172e-07
4300	1.53129e-07
4400	1.47955e-07
4500	1.56526e-07
4600	1.59182e-07
4700	1.4998e-07
4800	1.46503e-07
4900	1.45775e-07
5000	1.55696e-07
5100	1.49562e-07
5200	1.34186e-07
5300	1.41819e-07
5400	1.56204e-07
5500	1.45704e-07
5600	1.51607e-07
5700	1.47894e-07
5800	1.36761e-07
5900	1.26999e-07
6000	1.34258e-07
6100	1.42807e-07
6200	1.40611e-07
6300	1.36874e-07
6400	1.39662e-07
6500	1.33322e-07
6600	1.29896e-07
6700	1.36024e-07
6800	1.33985e-07
6900	1.3624e-07
7000	1.37062e-07
7100	1.39823e-07
7200	1.35228e-07
7300	1.23101e-07
7400	1.21985e-07
7500	1.29081e-07
7600	1.3193e-07
7700	1.34937e-07
7800	1.50671e-07
7900	1.4735e-07
8000	1.2667e-07
8100	1.22629e-07
8200	1.32938e-07
8300	1.31033e-07
8400	1.37271e-07
8500	1.35998e-07
8600	1.3854e-07
8700	1.34116e-07
8800	1.21267e-07
8900	1.27448e-07
9000	1.37667e-07
9100	1.33129e-07
9200	1.24277e-07
9300	1.25906e-07
9400	1.25864e-07
9500	1.33634e-07
9600	1.37734e-07
9700	1.33823e-07
9800	1.30811e-07
9900	1.30474e-07
10000	1.25647e-07
10100	1.35495e-07
10200	1.43667e-07
10300	1.31991e-07
10400	1.29862e-07
10500	1.29276e-07
10600	1.29469e-07
10700	1.30546e-07
10800	1.25898e-07
10900	1.29451e-07
11000	1.32477e-07
11100	1.28877e-07
11200	1.29144e-07
11300	1.33519e-07
11400	1.25224e-07
11500	1.20801e-07
11600	1.23901e-07
11700	1.28834e-07
11800	1.26579e-07
11900	1.2629e-07
12000	1.23246e-07
12100	1.28234e-07
12200	1.34845e-07
12300	1.28048e-07
12400	1.26138e-07
12500	1.30488e-07
12600	1.4215e-07
12700	1.35205e-07
12800	1.39485e-07
12900	1.38034e-07
13000	1.37928e-07
13100	1.31071e-07
13200	1.28392e-07
13300	1.32542e-07
13400	1.2227e-07
13500	1.22488e-07
13600	1.26346e-07
13700	1.24264e-07
13800	1.32559e-07
13900	1.28585e-07
14000	1.25371e-07
14100	1.18777e-07
14200	1.25695e-07
14300	1.26935e-07
14400	1.26851e-07
14500	1.29396e-07
14600	1.24476e-07
14700	1.28973e-07
14800	1.24847e-07
14900	1.3158e-07
15000	1.29303e-07
15100	1.19594e-07
15200	1.30968e-07
15300	1.24318e-07
15400	1.23583e-07
15500	1.23998e-07
15600	1.27454e-07
15700	1.34495e-07
15800	1.29484e-07
15900	1.21378e-07
16000	1.23375e-07
16100	1.25088e-07
16200	1.21653e-07
16300	1.2246e-07
16400	1.26941e-07
16500	1.26748e-07
16600	1.24478e-07
16700	1.1956e-07
16800	1.19163e-07
16900	1.25234e-07
17000	1.21056e-07
17100	1.24197e-07
17200	1.27951e-07
17300	1.27218e-07
17400	1.2443e-07
17500	1.24133e-07
17600	1.23735e-07
17700	1.3084e-07
17800	1.34007e-07
17900	1.38837e-07
18000	1.27043e-07
18100	1.23777e-07
18200	1.29666e-07
18300	1.22176e-07
18400	1.23155e-07
18500	1.37544e-07
18600	1.3958e-07
18700	1.29754e-07
18800	1.24195e-07
18900	1.18487e-07
19000	1.21064e-07
19100	1.298e-07
19200	1.19351e-07
19300	1.23335e-07
19400	1.31304e-07
19500	1.19418e-07
19600	1.27152e-07
19700	1.3282e-07
19800	1.32734e-07
19900	1.23013e-07
20000	1.18567e-07
20100	1.14924e-07
20200	1.26638e-07
20300	1.24303e-07
20400	1.18225e-07
20500	1.23215e-07
20600	1.24368e-07
20700	1.2804e-07
20800	1.30858e-07
20900	1.28134e-07
21000	1.29549e-07
21100	1.31954e-07
21200	1.24778e-07
21300	1.18843e-07
21400	1.24863e-07
21500	1.30196e-07
21600	1.21274e-07
21700	1.22563e-07
21800	1.26271e-07
21900	1.31122e-07
22000	1.29365e-07
22100	1.26497e-07
22200	1.27213e-07
22300	1.28622e-07
22400	1.30624e-07
22500	1.35132e-07
22600	1.27249e-07
22700	1.1946e-07
22800	1.12818e-07
22900	1.16218e-07
23000	1.25949e-07
23100	1.28116e-07
23200	1.21989e-07
23300	1.20958e-07
23400	1.20717e-07
23500	1.19604e-07
23600	1.18417e-07
23700	1.19428e-07
23800	1.25199e-07
23900	1.28767e-07
24000	1.25581e-07
24100	1.2384e-07
24200	1.1809e-07
24300	1.17718e-07
24400	1.21905e-07
24500	1.14441e-07
24600	1.15548e-07
24700	1.20636e-07
24800	1.24876e-07
24900	1.17549e-07
25000	1.26132e-07
25100	1.29864e-07
25200	1.27079e-07
25300	1.23522e-07
25400	1.22225e-07
25500	1.27331e-07
25600	1.18914e-07
25700	1.18102e-07
25800	1.23734e-07
25900	1.17571e-07
26000	1.1534e-07
26100	1.20502e-07
26200	1.25471e-07
26300	1.26119e-07
26400	1.24667e-07
26500	1.24227e-07
26600	1.25754e-07
26700	1.29349e-07
26800	1.25395e-07
26900	1.28107e-07
27000	1.24033e-07
27100	1.19854e-07
27200	1.21078e-07
27300	1.2126e-07
27400	1.17234e-07
27500	1.16177e-07
27600	1.20004e-07
27700	1.2101e-07
27800	1.16462e-07
27900	1.26853e-07
28000	1.22704e-07
28100	1.20114e-07
28200	1.28338e-07
28300	1.26403e-07
28400	1.27925e-07
28500	1.33934e-07
28600	1.21367e-07
28700	1.19596e-07
28800	1.25542e-07
28900	1.21561e-07
29000	1.15408e-07
29100	1.1873e-07
29200	1.26684e-07
29300	1.216e-07
29400	1.23481e-07
29500	1.20298e-07
29600	1.18157e-07
29700	1.27916e-07
29800	1.24991e-07
29900	1.29075e-07
30000	1.32346e-07
30100	1.21708e-07
30200	1.19678e-07
30300	1.21535e-07
30400	1.2604e-07
30500	1.27658e-07
30600	1.22567e-07
30700	1.23388e-07
30800	1.26107e-07
30900	1.28826e-07
31000	1.20343e-07
31100	1.24801e-07
31200	1.27227e-07
31300	1.28285e-07
31400	1.28326e-07
31500	1.22945e-07
31600	1.28474e-07
31700	1.24238e-07
31800	1.166e-07
31900	1.1465e-07
32000	1.1603e-07
32100	1.21059e-07
32200	1.21018e-07
32300	1.13344e-07
32400	1.2354e-07
32500	1.22585e-07
32600	1.1753e-07
32700	1.20111e-07
32800	1.27288e-07
32900	1.2405e-07
33000	1.17612e-07
33100	1.19079e-07
33200	1.22933e-07
33300	1.15569e-07
33400	1.20563e-07
33500	1.27022e-07
33600	1.25194e-07
33700	1.19621e-07
33800	1.14184e-07
33900	1.14189e-07
34000	1.16303e-07
34100	1.20896e-07
34200	1.22128e-07
34300	1.20184e-07
34400	1.13968e-07
34500	1.13398e-07
34600	1.11015e-07
34700	1.11398e-07
34800	1.20683e-07
34900	1.1739e-07
35000	1.1612e-07
35100	1.16873e-07
35200	1.23737e-07
35300	1.26832e-07
35400	1.24393e-07
35500	1.13539e-07
35600	1.14423e-07
35700	1.243e-07
35800	1.24681e-07
35900	1.19154e-07
36000	1.12388e-07
36100	1.1771e-07
36200	1.13909e-07
36300	1.20046e-07
36400	1.24253e-07
36500	1.22251e-07
36600	1.21675e-07
36700	1.22799e-07
36800	1.24074e-07
36900	1.25054e-07
37000	1.1887e-07
37100	1.14369e-07
37200	1.11668e-07
37300	1.08841e-07
37400	1.14046e-07
37500	1.18507e-07
37600	1.2438e-07
37700	1.18758e-07
37800	1.18676e-07
37900	1.18999e-07
38000	1.12009e-07
38100	1.1164e-07
38200	1.23494e-07
38300	1.23859e-07
38400	1.1391e-07
38500	1.08706e-07
38600	1.10387e-07
38700	1.12463e-07
38800	1.21226e-07
38900	1.18844e-07
39000	1.12849e-07
39100	1.13754e-07
39200	1.16043e-07
39300	1.1876e-07
39400	1.15652e-07
39500	1.15725e-07
39600	1.17983e-07
39700	1.224e-07
39800	1.19766e-07
39900	1.1962e-07
40000	1.23272e-07
40100	1.15019e-07
40200	1.14172e-07
40300	1.14646e-07
40400	1.12547e-07
40500	1.16676e-07
40600	1.19109e-07
40700	1.16378e-07
40800	1.172e-07
40900	1.12867e-07
41000	1.15923e-07
41100	1.23123e-07
41200	1.24488e-07
41300	1.3203e-07
41400	1.28057e-07
41500	1.2392e-07
41600	1.25727e-07
41700	1.18691e-07
41800	1.20368e-07
41900	1.14729e-07
42000	1.12811e-07
42100	1.1164e-07
42200	1.15385e-07
42300	1.13271e-07
42400	1.14724e-07
42500	1.21245e-07
42600	1.11207e-07
42700	1.10196e-07
42800	1.12129e-07
42900	1.10813e-07
43000	1.13327e-07
43100	1.22519e-07
43200	1.22848e-07
43300	1.2146e-07
43400	1.23573e-07
43500	1.23547e-07
43600	1.22573e-07
43700	1.223e-07
43800	1.24491e-07
43900	1.20515e-07
44000	1.13553e-07
44100	1.16397e-07
44200	1.17853e-07
44300	1.12371e-07
44400	1.16451e-07
44500	1.193e-07
44600	1.17861e-07
44700	1.13217e-07
44800	1.17711e-07
44900	1.15256e-07
45000	1.18365e-07
45100	1.14201e-07
45200	1.14982e-07
45300	1.14703e-07
45400	1.18418e-07
45500	1.19321e-07
45600	1.26336e-07
45700	1.21049e-07
45800	1.14829e-07
45900	1.20085e-07
46000	1.29107e-07
46100	1.21005e-07
46200	1.15884e-07
46300	1.19287e-07
46400	1.20737e-07
46500	1.26215e-07
46600	1.16524e-07
46700	1.17896e-07
46800	1.12336e-07
46900	1.11012e-07
47000	1.17061e-07
47100	1.21629e-07
47200	1.13835e-07
47300	1.1712e-07
47400	1.18644e-07
47500	1.16906e-07
47600	1.156e-07
47700	1.21802e-07
47800	1.1959e-07
47900	1.14692e-07
48000	1.15404e-07
48100	1.19664e-07
48200	1.21731e-07
48300	1.17141e-07
48400	1.1607e-07
48500	1.14108e-07
48600	1.21434e-07
48700	1.22759e-07
48800	1.15193e-07
48900	1.14327e-07
49000	1.11614e-07
49100	1.13234e-07
49200	1.15009e-07
49300	1.17006e-07
49400	1.1564e-07
49500	1.16476e-07
49600	1.0745e-07
49700	1.11194e-07
49800	1.15456e-07
49900	1.18931e-07
50000	1.14833e-07
50100	1.15116e-07
50200	1.18813e-07
50300	1.21345e-07
50400	1.22233e-07
50500	1.1632e-07
50600	1.18531e-07
50700	1.16167e-07
50800	1.19048e-07
50900	1.16254e-07
51000	1.20211e-07
51100	1.35095e-07
51200	1.27829e-07
51300	1.12808e-07
51400	1.21652e-07
51500	1.31725e-07
51600	1.23775e-07
51700	1.15761e-07
51800	1.14399e-07
51900	1.1391e-07
52000	1.11767e-07
52100	1.13353e-07
52200	1.14797e-07
52300	1.2386e-07
52400	1.23425e-07
52500	1.18467e-07
52600	1.15187e-07
52700	1.17103e-07
52800	1.20069e-07
52900	1.19136e-07
53000	1.18456e-07
53100	1.12175e-07
53200	1.06803e-07
53300	1.13134e-07
53400	1.12251e-07
53500	1.12261e-07
53600	1.20644e-07
53700	1.16048e-07
53800	1.12295e-07
53900	1.16093e-07
54000	1.17974e-07
54100	1.16237e-07
54200	1.14505e-07
54300	1.13934e-07
54400	1.10648e-07
54500	1.17458e-07
54600	1.19237e-07
54700	1.14109e-07
54800	1.10891e-07
54900	1.11063e-07
55000	1.11649e-07
55100	1.0405e-07
55200	1.03301e-07
55300	1.17771e-07
55400	1.17533e-07
55500	1.12222e-07
55600	1.12861e-07
55700	1.1247e-07
55800	1.15787e-07
55900	1.1612e-07
56000	1.14663e-07
56100	1.13665e-07
56200	1.07235e-07
56300	1.13261e-07
56400	1.15925e-07
56500	1.09023e-07
56600	1.08461e-07
56700	1.09994e-07
56800	1.14956e-07
56900	1.16302e-07
57000	1.13087e-07
57100	1.10492e-07
57200	1.06209e-07
57300	1.10416e-07
57400	1.16486e-07
57500	1.17747e-07
57600	1.20117e-07
57700	1.16115e-07
57800	1.13402e-07
57900	1.11508e-07
58000	1.12539e-07
58100	1.13754e-07
58200	1.11167e-07
58300	1.13236e-07
58400	1.21648e-07
58500	1.16996e-07
58600	1.09574e-07
58700	1.10722e-07
58800	1.15858e-07
58900	1.17137e-07
59000	1.08466e-07
59100	1.10636e-07
59200	1.14173e-07
59300	1.08031e-07
59400	1.07106e-07
59500	1.20704e-07
59600	1.18903e-07
59700	1.16774e-07
59800	1.11038e-07
59900	1.12996e-07
60000	1.11827e-07
60100	1.11055e-07
60200	1.10867e-07
60300	1.14104e-07
60400	1.12772e-07
60500	1.07652e-07
60600	1.08817e-07
60700	1.07696e-07
60800	1.0206e-07
60900	1.05316e-07
61000	1.05665e-07
61100	1.10187e-07
61200	1.09832e-07
61300	1.10069e-07
61400	1.10069e-07
61500	1.05223e-07
61600	1.05411e-07
61700	1.07003e-07
61800	1.06241e-07
61900	9.99911e-08
62000	1.13974e-07
62100	1.0949e-07
62200	1.08597e-07
62300	1.04873e-07
62400	1.11485e-07
62500	1.10265e-07
62600	1.11188e-07
62700	1.14476e-07
62800	1.16709e-07
62900	1.13002e-07
63000	1.13603e-07
63100	1.12427e-07
63200	1.06544e-07
63300	1.04176e-07
63400	1.04034e-07
63500	1.07639e-07
63600	1.17164e-07
63700	1.16674e-07
63800	1.11416e-07
63900	1.20967e-07
64000	1.14996e-07
64100	1.08544e-07
64200	1.10618e-07
64300	1.19708e-07
64400	1.16412e-07
64500	1.15025e-07
64600	1.21438e-07
64700	1.17487e-07
64800	1.09843e-07
64900	1.02248e-07
65000	1.07966e-07
65100	1.12922e-07
65200	1.11935e-07
65300	1.09988e-07
65400	1.13414e-07
65500	1.0915e-07
65600	9.70025e-08
65700	1.08788e-07
65800	1.09946e-07
65900	1.10164e-07
66000	1.17243e-07
66100	1.13782e-07
66200	1.11641e-07
66300	1.17284e-07
66400	1.20454e-07
66500	1.20976e-07
66600	1.17301e-07
66700	1.1196e-07
66800	1.10206e-07
66900	1.18677e-07
67000	1.33364e-07
67100	1.34902e-07
67200	1.98147e-07
67300	2.41489e-07
67400	2.24757e-07
67500	1.52957e-07
67600	1.26044e-07
67700	1.29588e-07
67800	1.94373e-07
67900	2.76779e-07
68000	3.86909e-07
68100	6.41663e-07
68200	1.03163e-06
68300	8.1766e-06
68400	8.38425e-06
68500	4.38839e-06
68600	1.16261e-06
68700	4.87524e-07
68800	1.76605e-07
68900	1.63251e-07
69000	1.46221e-07
69100	1.16145e-07
69200	1.36651e-07
69300	1.77476e-07
69400	1.64039e-07
69500	1.26494e-07
69600	1.16225e-07
69700	1.15505e-07
69800	1.10814e-07
69900	1.11396e-07
70000	1.19145e-07
70100	1.33756e-07
70200	1.18598e-07
70300	1.15501e-07
70400	1.14936e-07
70500	1.08737e-07
70600	1.07318e-07
70700	1.15043e-07
70800	1.14451e-07
70900	1.09329e-07
71000	1.11086e-07
71100	1.09484e-07
71200	1.09885e-07
71300	1.12573e-07
71400	1.13856e-07
71500	1.12028e-07
71600	1.11636e-07
71700	1.08882e-07
71800	1.05814e-07
71900	1.02019e-07
72000	1.02392e-07
72100	1.05636e-07
72200	1.01172e-07
72300	1.04958e-07
72400	1.08691e-07
72500	1.1026e-07
72600	1.08798e-07
72700	1.09186e-07
72800	1.08618e-07
72900	1.06269e-07
73000	1.00953e-07
73100	1.01948e-07
73200	1.1048e-07
73300	1.05237e-07
73400	9.96902e-08
73500	1.12536e-07
73600	1.08702e-07
73700	1.011e-07
73800	1.06891e-07
73900	1.12969e-07
74000	1.06032e-07
74100	1.01737e-07
74200	1.08093e-07
74300	1.07205e-07
74400	9.99079e-08
74500	1.06068e-07
74600	1.15213e-07
74700	1.12121e-07
74800	1.12106e-07
74900	1.14174e-07
75000	1.09175e-07
75100	9.76372e-08
75200	1.00365e-07
75300	1.09469e-07
75400	1.06673e-07
75500	1.00184e-07
75600	9.9681e-08
75700	9.68807e-08
75800	1.02032e-07
75900	1.03688e-07
76000	1.03885e-07
76100	1.06073e-07
76200	1.1268e-07
76300	1.05671e-07
76400	1.0282e-07
76500	1.07427e-07
76600	1.0829e-07
76700	1.04325e-07
76800	1.00141e-07
76900	1.08295e-07
77000	1.0781e-07
77100	1.06317e-07
77200	1.07434e-07
77300	1.11077e-07
77400	1.07815e-07
77500	1.01632e-07
77600	1.08173e-07
77700	1.07532e-07
77800	1.01155e-07
77900	1.0291e-07
78000	1.10305e-07
78100	1.07729e-07
78200	9.74838e-08
78300	9.69922e-08
78400	9.84997e-08
78500	1.00388e-07
78600	1.00916e-07
78700	1.08181e-07
78800	1.02971e-07
78900	1.05481e-07
79000	1.06568e-07
79100	1.01039e-07
79200	1.01926e-07
79300	1.03793e-07
79400	9.65128e-08
79500	1.00326e-07
79600	1.01948e-07
79700	1.02144e-07
79800	1.00639e-07
79900	1.05897e-07
80000	1.03982e-07
80100	1.089e-07
80200	1.08254e-07
80300	1.09094e-07
80400	1.02099e-07
80500	1.04789e-07
80600	1.06053e-07
80700	1.04941e-07
80800	1.05026e-07
80900	1.05813e-07
81000	1.00427e-07
81100	1.05399e-07
81200	1.01811e-07
81300	1.01527e-07
81400	1.09e-07
81500	1.04628e-07
81600	1.02119e-07
81700	9.81382e-08
81800	1.03957e-07
81900	1.04476e-07
82000	1.03343e-07
82100	1.02469e-07
82200	1.10597e-07
82300	1.14257e-07
82400	1.09341e-07
82500	1.07305e-07
82600	1.00571e-07
82700	9.59164e-08
82800	1.07118e-07
82900	1.10469e-07
83000	1.00892e-07
83100	1.03933e-07
83200	1.00433e-07
83300	1.01145e-07
83400	1.1178e-07
83500	1.1255e-07
83600	1.04986e-07
83700	1.06265e-07
83800	1.14596e-07
83900	1.09026e-07
84000	1.03568e-07
84100	1.02286e-07
84200	1.06961e-07
84300	1.16298e-07
84400	1.12038e-07
84500	1.08258e-07
84600	9.85455e-08
84700	9.14098e-08
84800	9.24372e-08
84900	1.00528e-07
85000	1.05848e-07
85100	9.75073e-08
85200	9.92489e-08
85300	1.02052e-07
85400	1.00892e-07
85500	9.76291e-08
85600	1.01405e-07
85700	1.02276e-07
85800	1.07652e-07
85900	9.80212e-08
86000	9.85426e-08
86100	1.07892e-07
86200	1.06697e-07
86300	1.12355e-07
86400	1.07794e-07
86500	1.05151e-07
86600	9.97045e-08
86700	9.53017e-08
86800	9.98242e-08
86900	1.07e-07
87000	1.07091e-07
87100	1.09484e-07
87200	1.07753e-07
87300	1.05858e-07
87400	1.04439e-07
87500	1.01864e-07
87600	1.05021e-07
87700	1.03967e-07
87800	1.01263e-07
87900	1.01286e-07
88000	9.98038e-08
88100	1.01663e-07
88200	1.03399e-07
88300	9.93458e-08
88400	1.02716e-07
88500	1.07455e-07
88600	1.01472e-07
88700	1.00803e-07
88800	9.71287e-08
88900	9.53634e-08
89000	9.86804e-08
89100	1.11211e-07
89200	1.0657e-07
89300	9.83762e-08
89400	9.59895e-08
89500	9.34294e-08
89600	1.03465e-07
89700	1.01757e-07
89800	9.83433e-08
89900	1.05865e-07
90000	1.10291e-07
90100	1.03167e-07
90200	1.03147e-07
90300	1.01865e-07
90400	9.35899e-08
90500	9.57876e-08
90600	1.06631e-07
90700	1.02462e-07
90800	9.7072e-08
90900	1.01692e-07
91000	1.00158e-07
91100	9.4954e-08
91200	9.88662e-08
91300	1.00398e-07
91400	9.45333e-08
91500	9.7168e-08
91600	9.60635e-08
91700	9.42e-08
91800	9.52369e-08
91900	1.02523e-07
92000	1.02165e-07
92100	1.01746e-07
92200	9.38626e-08
92300	9.82873e-08
92400	9.35769e-08
92500	9.8892e-08
92600	1.00458e-07
92700	9.88345e-08
92800	1.00571e-07
92900	9.78243e-08
93000	1.00174e-07
93100	1.06387e-07
93200	9.7337e-08
93300	9.36226e-08
93400	9.22489e-08
93500	9.31967e-08
93600	1.02297e-07
93700	1.01277e-07
93800	9.89517e-08
93900	9.26905e-08
94000	9.49341e-08
94100	1.00742e-07
94200	9.84297e-08
94300	9.27781e-08
94400	9.60478e-08
94500	9.73478e-08
94600	9.6741e-08
94700	9.71267e-08
94800	9.65385e-08
94900	9.36358e-08
95000	9.55405e-08
95100	9.57989e-08
95200	9.33703e-08
95300	9.63496e-08
95400	9.20909e-08
95500	9.15594e-08
95600	1.04599e-07
95700	1.04167e-07
95800	9.63318e-08
95900	9.23131e-08
96000	9.13245e-08
96100	1.00061e-07
96200	9.9803e-08
96300	9.45462e-08
96400	9.63403e-08
96500	9.34738e-08
96600	9.82877e-08
96700	1.00517e-07
96800	1.00799e-07
96900	9.72825e-08
97000	9.52621e-08
97100	9.61061e-08
97200	9.73388e-08
97300	9.7796e-08
97400	9.23858e-08
97500	9.73417e-08
97600	1.0131e-07
97700	9.38734e-08
97800	1.00697e-07
97900	9.54638e-08
98000	9.89242e-08
98100	9.38762e-08
98200	9.82685e-08
98300	1.00325e-07
98400	1.07379e-07
98500	1.01132e-07
98600	9.58098e-08
98700	9.87384e-08
98800	9.87318e-08
98900	9.46803e-08
99000	9.47714e-08
99100	9.27563e-08
99200	9.14792e-08
99300	9.72605e-08
99400	9.63749e-08
99500	9.33488e-08
99600	9.46373e-08
99700	9.68379e-08
99800	9.57728e-08
99900	9.65821e-08
100000	9.92686e-08
100100	9.62317e-08
100200	1.01059e-07
100300	9.12531e-08
100400	9.63822e-08
100500	9.32295e-08
100600	9.29677e-08
100700	9.46719e-08
100800	9.45232e-08
100900	9.43432e-08
101000	1.00266e-07
101100	9.92519e-08
101200	1.06721e-07
101300	1.00463e-07
101400	9.62768e-08
101500	9.7787e-08
101600	1.02552e-07
101700	1.01415e-07
101800	9.72077e-08
101900	1.02592e-07
102000	1.01802e-07
102100	9.56315e-08
102200	9.13341e-08
102300	9.36806e-08
102400	9.72021e-08
102500	1.02807e-07
102600	1.08189e-07
102700	1.06411e-07
102800	1.02114e-07
102900	9.73505e-08
103000	9.23846e-08
103100	9.92093e-08
103200	9.40803e-08
103300	9.5003e-08
103400	9.79406e-08
103500	9.11336e-08
103600	9.19399e-08
103700	9.61055e-08
103800	9.81304e-08
103900	9.92909e-08
104000	1.01641e-07
104100	9.76933e-08
104200	9.93932e-08
104300	9.66771e-08
104400	1.00477e-07
104500	1.00068e-07
104600	9.8987e-08
104700	9.19075e-08
104800	9.2994e-08
104900	9.45531e-08
105000	9.72212e-08
105100	9.40906e-08
105200	9.63047e-08
105300	9.44347e-08
105400	9.95457e-08
105500	9.77063e-08
105600	9.27491e-08
105700	9.81062e-08
105800	9.92847e-08
105900	1.08973e-07
106000	1.06118e-07
106100	9.51311e-08
106200	9.30422e-08
106300	9.58751e-08
106400	9.44354e-08
106500	9.9591e-08
106600	9.74339e-08
106700	9.67532e-08
106800	9.03107e-08
106900	8.99358e-08
107000	8.69023e-08
107100	8.72529e-08
107200	9.82259e-08
107300	9.72862e-08
107400	9.01657e-08
107500	9.27871e-08
107600	9.02909e-08
107700	9.12034e-08
107800	9.06874e-08
107900	8.88398e-08
108000	9.30273e-08
108100	9.47373e-08
108200	9.74708e-08
108300	9.2987e-08
108400	8.44226e-08
108500	9.54599e-08
108600	1.02344e-07
108700	9.30558e-08
108800	9.42314e-08
108900	9.11176e-08
109000	8.83723e-08
109100	9.44466e-08
109200	9.75303e-08
109300	1.02076e-07
109400	9.51883e-08
109500	9.36904e-08
109600	9.61444e-08
109700	9.42104e-08
109800	8.77354e-08
109900	9.45801e-08
110000	9.40409e-08
110100	9.29788e-08
110200	9.85489e-08
110300	9.72583e-08
110400	8.90059e-08
110500	8.59583e-08
110600	8.66958e-08
110700	8.77669e-08
110800	9.32479e-08
110900	9.35624e-08
111000	8.55796e-08
111100	8.5882e-08
111200	8.95362e-08
111300	8.97014e-08
111400	8.70482e-08
111500	9.3087e-08
111600	8.88382e-08
111700	9.41857e-08
111800	9.22777e-08
111900	8.43685e-08
112000	8.52487e-08
112100	9.793e-08
112200	9.64525e-08
112300	8.93265e-08
112400	9.19882e-08
112500	8.65252e-08
112600	8.89128e-08
112700	8.52994e-08
112800	7.78357e-08
112900	8.57761e-08
113000	9.32215e-08
113100	9.25363e-08
113200	9.14379e-08
113300	9.54796e-08
113400	9.08005e-08
113500	8.67154e-08
113600	8.61722e-08
113700	8.70371e-08
113800	9.24839e-08
113900	8.5957e-08
114000	8.69974e-08
114100	8.92855e-08
114200	8.66779e-08
114300	8.93252e-08
114400	9.81721e-08
114500	9.43326e-08
114600	9.91358e-08
114700	9.65969e-08
114800	9.03202e-08
114900	8.85083e-08
115000	9.16869e-08
115100	9.44629e-08
115200	9.34708e-08
115300	9.06715e-08
115400	8.97837e-08
115500	8.32334e-08
115600	8.05193e-08
115700	8.91704e-08
115800	9.0567e-08
115900	8.49125e-08
116000	7.9528e-08
116100	8.18158e-08
116200	8.54859e-08
116300	8.73369e-08
116400	8.80225e-08
116500	7.91739e-08
116600	8.03465e-08
116700	8.24355e-08
116800	9.05383e-08
116900	9.35119e-08
117000	9.52058e-08
117100	8.80796e-08
117200	8.50528e-08
117300	8.78289e-08
117400	9.23275e-08
117500	9.52747e-08
117600	8.91001e-08
117700	8.97195e-08
117800	8.24362e-08
117900	8.12516e-08
118000	9.44337e-08
118100	9.75718e-08
118200	9.61812e-08
118300	8.88079e-08
118400	9.13683e-08
118500	9.02313e-08
118600	9.14525e-08
118700	9.11157e-08
118800	9.14159e-08
118900	9.23851e-08
119000	8.9006e-08
119100	9.29607e-08
119200	8.9383e-08
119300	9.24692e-08
119400	8.89193e-08
119500	8.63331e-08
119600	8.64561e-08
119700	8.33019e-08
119800	8.85483e-08
119900	8.71476e-08
120000	8.39888e-08
120100	8.97682e-08
120200	8.25534e-08
120300	8.06424e-08
120400	9.00883e-08
120500	9.03223e-08
120600	8.56742e-08
120700	8.3313e-08
120800	8.23081e-08
120900	8.79341e-08
121000	8.43751e-08
121100	8.39911e-08
121200	8.19941e-08
121300	8.35552e-08
121400	8.56941e-08
121500	8.95997e-08
121600	9.08477e-08
121700	9.43259e-08
121800	9.08027e-08
121900	8.27524e-08
122000	8.45361e-08
122100	8.48044e-08
122200	9.20429e-08
122300	9.38099e-08
122400	9.27924e-08
122500	8.78512e-08
122600	9.28038e-08
122700	9.59541e-08
122800	8.9021e-08
122900	8.62425e-08
123000	8.91268e-08
123100	9.61535e-08
123200	9.15522e-08
123300	8.47589e-08
123400	8.41414e-08
123500	8.79121e-08
123600	8.23537e-08
123700	8.00041e-08
123800	8.06341e-08
123900	8.81086e-08
124000	8.59421e-08
124100	8.58488e-08
124200	8.16426e-08
124300	8.02196e-08
124400	8.79212e-08
124500	8.79369e-08
124600	8.42821e-08
124700	8.53486e-08
124800	8.15696e-08
124900	8.13459e-08
125000	8.65265e-08
125100	8.1368e-08
125200	7.62444e-08
125300	8.02487e-08
125400	7.69221e-08
125500	7.87149e-08
125600	8.63772e-08
125700	8.56482e-08
125800	8.32202e-08
125900	8.84419e-08
126000	8.80874e-08
126100	8.74466e-08
126200	8.85921e-08
126300	8.56413e-08
126400	8.23422e-08
126500	8.60751e-08
126600	8.01272e-08
126700	8.15458e-08
126800	8.4604e-08
126900	8.79228e-08
127000	8.40008e-08
127100	8.25857e-08
127200	7.77603e-08
127300	8.36536e-08
127400	8.706e-08
127500	8.52352e-08
127600	9.1122e-08
127700	8.99941e-08
127800	8.7634e-08
127900	8.3613e-08
128000	8.8847e-08
128100	8.55849e-08
128200	8.29676e-08
128300	8.21897e-08
128400	8.22257e-08
128500	7.92258e-08
128600	8.35345e-08
128700	8.21252e-08
128800	8.12664e-08
128900	8.2822e-08
129000	7.9382e-08
129100	8.15841e-08
129200	8.34578e-08
129300	8.49341e-08
129400	8.60076e-08
129500	8.51912e-08
129600	8.45582e-08
129700	8.57239e-08
129800	8.17786e-08
129900	8.33902e-08
130000	8.8847e-08
130100	8.6935e-08
130200	8.57173e-08
130300	8.35266e-08
130400	8.96043e-08
130500	8.42327e-08
130600	8.23573e-08
130700	7.82612e-08
130800	7.71923e-08
130900	7.64748e-08
131000	8.14504e-08
131100	8.63623e-08
131200	7.7264e-08
131300	7.85798e-08
131400	8.09374e-08
131500	8.31933e-08
131600	8.34331e-08
131700	1.01848e-07
131800	1.09739e-07
131900	8.75178e-08
132000	8.53701e-08
132100	8.51518e-08
132200	8.31816e-08
132300	8.09125e-08
132400	8.11754e-08
132500	8.64438e-08
132600	7.58186e-08
132700	7.85064e-08
132800	7.71333e-08
132900	7.89988e-08
133000	8.46083e-08
133100	8.71106e-08
133200	8.11591e-08
133300	8.59615e-08
133400	8.13828e-08
133500	7.90676e-08
133600	7.57581e-08
133700	7.7592e-08
133800	7.8258e-08
133900	7.99783e-08
134000	7.9155e-08
134100	7.51077e-08
134200	7.77208e-08
134300	8.0729e-08
134400	8.81389e-08
134500	8.54145e-08
134600	8.63168e-08
134700	8.43849e-08
134800	8.67364e-08
134900	8.55751e-08
135000	8.15588e-08
135100	8.7713e-08
135200	8.39247e-08
135300	8.42981e-08
135400	8.56181e-08
135500	8.52988e-08
135600	8.64187e-08
135700	8.56244e-08
135800	8.29806e-08
135900	8.2646e-08
136000	8.39546e-08
136100	7.91759e-08
136200	8.60723e-08
136300	8.79927e-08
136400	8.20689e-08
136500	7.99977e-08
136600	7.89449e-08
136700	7.83869e-08
136800	7.87139e-08
136900	7.64078e-08
137000	8.0902e-08
137100	8.3334e-08
137200	8.17911e-08
137300	8.13232e-08
137400	8.02065e-08
137500	7.54081e-08
137600	7.9583e-08
137700	7.99902e-08
137800	7.93655e-08
137900	8.08923e-08
138000	7.77224e-08
138100	7.79418e-08
138200	8.055e-08
138300	8.09019e-08
138400	8.08585e-08
138500	7.67184e-08
138600	7.89894e-08
138700	8.5921e-08
138800	7.95467e-08
138900	7.71707e-08
139000	7.73741e-08
139100	7.16201e-08
139200	7.54081e-08
139300	8.50623e-08
139400	8.21483e-08
139500	7.69951e-08
139600	8.00102e-08
139700	7.50475e-08
139800	7.2089e-08
139900	7.45852e-08
140000	7.92564e-08
140100	7.94502e-08
140200	8.29249e-08
140300	7.70162e-08
140400	7.97632e-08
140500	7.92889e-08
140600	8.27494e-08
140700	8.29798e-08
140800	8.11585e-08
140900	8.04884e-08
141000	7.52709e-08
141100	7.24707e-08
141200	7.62447e-08
141300	8.1408e-08
141400	8.5894e-08
141500	8.23496e-08
141600	7.55163e-08
141700	7.72692e-08
141800	7.47112e-08
141900	7.42081e-08
142000	7.79876e-08
142100	7.95841e-08
142200	8.7692e-08
142300	8.39979e-08
142400	7.90523e-08
142500	8.05169e-08
142600	8.09092e-08
142700	7.61072e-08
142800	7.84053e-08
142900	8.1017e-08
143000	7.53417e-08
143100	8.20374e-08
143200	7.94761e-08
143300	7.68518e-08
143400	7.82909e-08
143500	7.56747e-08
143600	7.31421e-08
143700	7.82403e-08
143800	7.73282e-08
143900	7.28066e-08
144000	7.80234e-08
144100	7.68571e-08
144200	8.2093e-08
144300	7.81944e-08
144400	7.46923e-08
144500	7.49528e-08
144600	7.51096e-08
144700	7.63496e-08
144800	7.51117e-08
144900	7.44278e-08
145000	7.67154e-08
145100	7.81287e-08
145200	7.20288e-08
145300	8.28656e-08
145400	8.47912e-08
145500	7.86409e-08
145600	7.25774e-08
145700	7.80472e-08
145800	8.01636e-08
145900	8.27376e-08
146000	7.96035e-08
146100	7.93426e-08
146200	8.19594e-08
146300	7.9514e-08
146400	7.74027e-08
146500	7.98748e-08
146600	7.67702e-08
146700	7.58876e-08
146800	7.22056e-08
146900	7.75364e-08
147000	7.34224e-08
147100	7.65859e-08
147200	8.22443e-08
147300	8.25012e-08
147400	7.85795e-08
147500	8.0109e-08
147600	7.64336e-08
147700	7.0993e-08
147800	7.56428e-08
147900	7.28812e-08
148000	7.01983e-08
148100	7.96506e-08
148200	8.24093e-08
148300	7.74204e-08
148400	7.13561e-08
148500	7.11314e-08
148600	7.40851e-08
148700	7.89657e-08
148800	7.4686e-08
148900	7.61155e-08
149000	7.96362e-08
149100	7.78814e-08
149200	7.81013e-08
149300	7.42317e-08
149400	7.32826e-08
149500	7.43641e-08
149600	7.59163e-08
149700	7.39682e-08
149800	6.84541e-08
149900	7.39451e-08
150000	7.95097e-08
150100	7.35714e-08
150200	7.35673e-08
150300	7.84244e-08
150400	8.25342e-08
150500	8.22425e-08
150600	7.80621e-08
150700	7.44641e-08
150800	7.50964e-08
150900	7.11403e-08
151000	7.12284e-08
151100	7.50064e-08
151200	7.75135e-08
151300	7.2461e-08
151400	7.35861e-08
151500	6.95048e-08
151600	7.2016e-08
151700	7.86823e-08
151800	7.81841e-08
151900	7.50038e-08
152000	7.61888e-08
152100	7.5775e-08
152200	7.48044e-08
152300	7.70634e-08
152400	7.70878e-08
152500	7.55381e-08
152600	7.63547e-08
152700	7.30873e-08
152800	7.22738e-08
152900	7.0849e-08
153000	7.09015e-08
153100	7.10741e-08
153200	7.21193e-08
153300	7.51959e-08
153400	6.97603e-08
153500	7.43446e-08
153600	7.46909e-08
153700	7.49246e-08
153800	7.31838e-08
153900	7.11914e-08
154000	6.91068e-08
154100	7.67636e-08
154200	7.3307e-08
154300	7.10566e-08
154400	7.48541e-08
154500	7.07487e-08
154600	6.9313e-08
154700	7.55199e-08
154800	7.08144e-08
154900	6.76335e-08
155000	7.08778e-08
155100	7.68154e-08
155200	7.86118e-08
155300	7.69535e-08
155400	7.23755e-08
155500	7.29652e-08
155600	7.56117e-08
155700	7.58708e-08
155800	7.3396e-08
155900	6.74687e-08
156000	6.93832e-08
156100	7.12907e-08
156200	7.45729e-08
156300	6.76685e-08
156400	6.55012e-08
156500	6.63032e-08
156600	7.31272e-08
156700	7.35734e-08
156800	7.15766e-08
156900	7.3987e-08
157000	7.97774e-08
157100	7.77717e-08
157200	7.84547e-08
157300	7.52492e-08
157400	6.9971e-08
157500	6.7117e-08
157600	7.26902e-08
157700	7.51117e-08
157800	6.8339e-08
157900	7.26084e-08
158000	7.67434e-08
158100	7.15743e-08
158200	7.32262e-08
158300	6.99745e-08
158400	7.05294e-08
158500	7.13766e-08
158600	7.18461e-08
158700	6.80034e-08
158800	6.90181e-08
158900	7.14396e-08
159000	7.41838e-08
159100	8.12167e-08
159200	7.65305e-08
159300	7.28481e-08
159400	7.37476e-08
159500	7.68971e-08
159600	7.81627e-08
159700	7.30302e-08
159800	7.17006e-08
159900	7.17487e-08
160000	7.16402e-08
160100	7.01148e-08
160200	7.17137e-08
160300	7.07767e-08
160400	7.03403e-08
160500	7.21233e-08
160600	7.33018e-08
160700	6.67728e-08
160800	6.29011e-08
160900	6.76062e-08
161000	7.47072e-08
161100	6.96518e-08
161200	7.01149e-08
161300	7.60158e-08
161400	7.29172e-08
161500	6.96473e-08
161600	6.78558e-08
161700	6.73111e-08
161800	6.87364e-08
161900	6.62665e-08
162000	6.33539e-08
162100	6.98245e-08
162200	7.15246e-08
162300	6.86114e-08
162400	6.48773e-08
162500	6.59435e-08
162600	7.29679e-08
162700	7.78889e-08
162800	6.95838e-08
162900	6.80636e-08
163000	6.94653e-08
163100	7.54181e-08
163200	7.47127e-08
163300	7.41406e-08
163400	7.81883e-08
163500	7.1562e-08
163600	7.21042e-08
163700	7.24087e-08
163800	7.4608e-08
163900	6.94222e-08
164000	7.21183e-08
164100	6.60305e-08
164200	6.52341e-08
164300	7.07311e-08
164400	7.37939e-08
164500	6.88749e-08
164600	7.14788e-08
164700	7.39391e-08
164800	7.19311e-08
164900	7.14085e-08
165000	6.98063e-08
165100	6.83848e-08
165200	6.99079e-08
165300	7.48811e-08
165400	7.38862e-08
165500	7.17299e-08
165600	7.17056e-08
165700	7.17833e-08
165800	7.021e-08
165900	7.32564e-08
166000	6.9973e-08
166100	6.97399e-08
166200	7.30055e-08
166300	6.79661e-08
166400	6.90663e-08
166500	6.9405e-08
166600	7.03805e-08
166700	6.61996e-08
166800	6.7585e-08
166900	6.9143e-08
167000	6.97958e-08
167100	6.18021e-08
167200	6.37568e-08
167300	7.01884e-08
167400	7.01381e-08
167500	6.60481e-08
167600	6.89026e-08
167700	7.43234e-08
167800	7.13654e-08
167900	6.67779e-08
168000	6.82859e-08
168100	6.95771e-08
168200	6.80013e-08
168300	7.04644e-08
168400	6.92728e-08
168500	6.5564e-08
168600	6.40374e-08
168700	6.48738e-08
168800	6.81814e-08
168900	6.63266e-08
169000	6.81325e-08
169100	7.05056e-08
169200	7.28318e-08
169300	7.19656e-08
169400	7.10393e-08
169500	7.10949e-08
169600	6.68002e-08
169700	7.42188e-08
169800	6.70546e-08
169900	6.48737e-08
170000	6.62741e-08
170100	7.39562e-08
170200	7.37019e-08
170300	7.03181e-08
170400	6.62532e-08
170500	6.73917e-08
170600	6.6676e-08
170700	6.76566e-08
170800	6.7023e-08
170900	6.90404e-08
171000	7.19693e-08
171100	6.91004e-08
171200	7.14386e-08
171300	7.30614e-08
171400	6.54428e-08
171500	6.70485e-08
171600	6.81586e-08
171700	6.28212e-08
171800	6.77383e-08
171900	6.81503e-08
172000	6.82315e-08
172100	6.9485e-08
172200	6.87392e-08
172300	6.64891e-08
172400	6.28443e-08
172500	6.47484e-08
172600	6.91812e-08
172700	7.04032e-08
172800	6.60905e-08
172900	6.56448e-08
173000	6.50239e-08
173100	6.28407e-08
173200	6.51767e-08
173300	6.78196e-08
173400	7.307e-08
173500	6.78647e-08
173600	5.86239e-08
173700	6.58483e-08
173800	6.93531e-08
173900	7.09971e-08
174000	6.76713e-08
174100	6.5054e-08
174200	7.17525e-08
174300	7.08478e-08
174400	6.58121e-08
174500	6.08558e-08
174600	6.32456e-08
174700	6.8373e-08
174800	6.9559e-08
174900	7.05307e-08
175000	7.1539e-08
175100	7.02896e-08
175200	7.16847e-08
175300	6.85777e-08
175400	6.64999e-08
175500	6.61565e-08
175600	6.29696e-08
175700	6.3202e-08
175800	6.71711e-08
175900	6.64849e-08
176000	5.92637e-08
176100	5.98048e-08
176200	5.9891e-08
176300	6.27602e-08
176400	6.59569e-08
176500	7.04855e-08
176600	6.84522e-08
176700	6.36464e-08
176800	6.60073e-08
176900	6.46185e-08
177000	6.60627e-08
177100	6.74914e-08
177200	6.64254e-08
177300	6.00422e-08
177400	6.62376e-08
177500	6.67432e-08
177600	6.72937e-08
177700	6.74471e-08
177800	6.94359e-08
177900	6.91609e-08
178000	6.67507e-08
178100	6.13921e-08
178200	6.78499e-08
178300	7.07249e-08
178400	6.29845e-08
178500	6.39463e-08
178600	7.07579e-08
178700	6.73378e-08
178800	5.89827e-08
178900	5.99347e-08
179000	6.76352e-08
179100	6.33488e-08
179200	6.2881e-08
179300	6.68077e-08
179400	6.90173e-08
179500	6.68462e-08
179600	6.20186e-08
179700	6.36982e-08
179800	6.71955e-08
179900	6.52395e-08
180000	6.29123e-08
180100	6.5902e-08
180200	6.5838e-08
180300	6.82409e-08
180400	6.46735e-08
180500	6.46368e-08
180600	6.05009e-08
180700	6.07491e-08
180800	6.35728e-08
180900	6.71339e-08
181000	6.58762e-08
181100	6.33187e-08
181200	6.31885e-08
181300	6.34436e-08
181400	6.22814e-08
181500	6.5834e-08
181600	6.87036e-08
181700	6.84505e-08
181800	6.99524e-08
181900	6.69381e-08
182000	6.72379e-08
182100	6.78852e-08
182200	6.71388e-08
182300	6.67005e-08
182400	6.40752e-08
182500	6.19589e-08
182600	6.5138e-08
182700	6.182e-08
182800	5.74778e-08
182900	5.76197e-08
183000	6.19594e-08
183100	6.11995e-08
183200	6.7396e-08
183300	6.82159e-08
183400	6.22034e-08
183500	6.42096e-08
183600	6.60908e-08
183700	6.24156e-08
183800	6.60084e-08
183900	6.45065e-08
184000	6.04682e-08
184100	6.12147e-08
184200	6.62841e-08
184300	6.47717e-08
184400	6.47339e-08
184500	6.11683e-08
184600	6.06618e-08
184700	5.88603e-08
184800	6.24858e-08
184900	6.33995e-08
185000	6.3855e-08
185100	6.47325e-08
185200	6.11176e-08
185300	6.17647e-08
185400	6.93452e-08
185500	6.54883e-08
185600	6.14517e-08
185700	6.38593e-08
185800	6.16539e-08
185900	6.21558e-08
186000	6.66415e-08
186100	6.09658e-08
186200	5.77392e-08
186300	6.54853e-08
186400	6.64144e-08
186500	5.98802e-08
186600	6.28186e-08
186700	6.33048e-08
186800	6.35058e-08
186900	6.54719e-08
187000	6.19974e-08
187100	5.8981e-08
187200	6.26695e-08
187300	6.56621e-08
187400	6.42908e-08
187500	6.10093e-08
187600	5.98559e-08
187700	6.00942e-08
187800	6.11722e-08
187900	6.13602e-08
188000	5.85485e-08
188100	5.81767e-08
188200	5.85687e-08
188300	6.15729e-08
188400	6.14118e-08
188500	5.97182e-08
188600	6.17978e-08
188700	5.98234e-08
188800	6.39982e-08
188900	6.38943e-08
189000	6.26054e-08
189100	6.4216e-08
189200	6.21531e-08
189300	6.31466e-08
189400	6.34317e-08
189500	6.2386e-08
189600	6.61831e-08
189700	6.34704e-08
189800	6.23352e-08
189900	6.68199e-08
190000	6.16702e-08
190100	5.65536e-08
190200	6.16986e-08
190300	6.06567e-08
190400	5.69182e-08
190500	5.80143e-08
190600	5.96509e-08
190700	6.17111e-08
190800	6.1799e-08
190900	6.11911e-08
191000	6.10277e-08
191100	6.3966e-08
191200	6.36296e-08
191300	6.47962e-08
191400	6.40266e-08
191500	6.23032e-08
191600	6.44427e-08
191700	6.70748e-08
191800	6.29463e-08
191900	6.1484e-08
192000	6.12881e-08
192100	6.18543e-08
192200	5.81785e-08
192300	5.84661e-08
192400	6.20996e-08
192500	6.26603e-08
192600	5.7057e-08
192700	6.03239e-08
192800	6.38128e-08
192900	6.1158e-08
193000	6.29815e-08
193100	6.07376e-08
193200	5.92924e-08
193300	6.04259e-08
193400	5.82504e-08
193500	5.95942e-08
193600	6.0185e-08
193700	6.22905e-08
193800	6.23018e-08
193900	5.76666e-08
194000	5.59285e-08
194100	5.635e-08
194200	5.97673e-08
194300	6.01186e-08
194400	5.97118e-08
194500	5.65654e-08
194600	5.2225e-08
194700	5.61057e-08
194800	5.84111e-08
194900	5.57888e-08
195000	5.76953e-08
195100	6.11428e-08
195200	6.20388e-08
195300	6.04052e-08
195400	5.9514e-08
195500	6.1051e-08
195600	5.95004e-08
195700	6.35973e-08
195800	6.20172e-08
195900	5.92608e-08
196000	5.87345e-08
196100	5.79886e-08
196200	5.69942e-08
196300	5.73328e-08
196400	6.17027e-08
196500	6.58222e-08
196600	6.36664e-08
196700	6.063e-08
196800	6.05714e-08
196900	5.80064e-08
197000	5.93524e-08
197100	6.25974e-08
197200	6.24757e-08
197300	5.942e-08
197400	5.93574e-08
197500	6.30684e-08
197600	6.15573e-08
197700	5.72368e-08
197800	5.74532e-08
197900	5.64624e-08
198000	5.87892e-08
198100	5.73044e-08
198200	5.83025e-08
198300	5.86228e-08
198400	5.76928e-08
198500	6.06338e-08
198600	5.86324e-08
198700	5.88087e-08
198800	5.77189e-08
198900	6.23238e-08
199000	5.96493e-08
199100	5.86365e-08
199200	5.90083e-08
199300	6.02863e-08
199400	6.27352e-08
199500	6.58081e-08
199600	6.09419e-08
199700	6.03677e-08
[truncated: 1,002 more rows]

## Sheet: Sheet10
Fig EXT 5j
freq (Hz)	Sv (arb.)
0	2.44518e-06
100	2.70481e-06
200	1.49797e-06
300	6.91859e-07
400	5.70128e-07
500	4.76994e-07
600	4.16504e-07
700	4.2787e-07
800	3.79708e-07
900	3.4019e-07
1000	3.62872e-07
1100	3.22026e-07
1200	3.02682e-07
1300	3.03292e-07
1400	2.87869e-07
1500	2.72558e-07
1600	2.64265e-07
1700	2.51856e-07
1800	2.35253e-07
1900	2.29511e-07
2000	2.28872e-07
2100	2.41624e-07
2200	2.22019e-07
2300	2.21865e-07
2400	2.15202e-07
2500	2.14778e-07
2600	2.16193e-07
2700	2.04229e-07
2800	1.90548e-07
2900	2.00226e-07
3000	1.98948e-07
3100	1.8565e-07
3200	1.92057e-07
3300	1.972e-07
3400	1.95817e-07
3500	1.82214e-07
3600	1.77832e-07
3700	1.68462e-07
3800	1.74234e-07
3900	1.86291e-07
4000	1.77134e-07
4100	1.77547e-07
4200	1.79301e-07
4300	1.90111e-07
4400	1.73992e-07
4500	1.73244e-07
4600	1.69235e-07
4700	1.863e-07
4800	1.83346e-07
4900	1.77725e-07
5000	1.77633e-07
5100	1.75498e-07
5200	1.70024e-07
5300	1.63112e-07
5400	1.64626e-07
5500	1.62979e-07
5600	1.61819e-07
5700	1.74302e-07
5800	1.69666e-07
5900	1.69165e-07
6000	1.69304e-07
6100	1.72938e-07
6200	1.7174e-07
6300	1.65047e-07
6400	1.54942e-07
6500	1.53625e-07
6600	1.53995e-07
6700	1.56545e-07
6800	1.52779e-07
6900	1.59339e-07
7000	1.61587e-07
7100	1.6086e-07
7200	1.57005e-07
7300	1.44248e-07
7400	1.58533e-07
7500	1.50411e-07
7600	1.52142e-07
7700	1.6791e-07
7800	1.61781e-07
7900	1.40626e-07
8000	1.46898e-07
8100	1.61079e-07
8200	1.62292e-07
8300	1.55253e-07
8400	1.563e-07
8500	1.51944e-07
8600	1.62181e-07
8700	1.50288e-07
8800	1.49474e-07
8900	1.50929e-07
9000	1.63482e-07
9100	1.5573e-07
9200	1.5471e-07
9300	1.53943e-07
9400	1.55406e-07
9500	1.57426e-07
9600	1.48133e-07
9700	1.49285e-07
9800	1.46061e-07
9900	1.49838e-07
10000	1.46348e-07
10100	1.50658e-07
10200	1.54198e-07
10300	1.38742e-07
10400	1.39238e-07
10500	1.46677e-07
10600	1.48714e-07
10700	1.44116e-07
10800	1.48047e-07
10900	1.44494e-07
11000	1.41296e-07
11100	1.39534e-07
11200	1.45184e-07
11300	1.5251e-07
11400	1.47834e-07
11500	1.43066e-07
11600	1.40649e-07
11700	1.46209e-07
11800	1.4854e-07
11900	1.43694e-07
12000	1.3416e-07
12100	1.33401e-07
12200	1.37053e-07
12300	1.3668e-07
12400	1.44229e-07
12500	1.49282e-07
12600	1.4879e-07
12700	1.39477e-07
12800	1.37838e-07
12900	1.38122e-07
13000	1.50576e-07
13100	1.44047e-07
13200	1.38595e-07
13300	1.42588e-07
13400	1.44912e-07
13500	1.42267e-07
13600	1.36399e-07
13700	1.3381e-07
13800	1.40614e-07
13900	1.3093e-07
14000	1.4342e-07
14100	1.46813e-07
14200	1.37957e-07
14300	1.45562e-07
14400	1.48219e-07
14500	1.41271e-07
14600	1.37036e-07
14700	1.40215e-07
14800	1.4286e-07
14900	1.4205e-07
15000	1.42188e-07
15100	1.43577e-07
15200	1.28568e-07
15300	1.25294e-07
15400	1.35658e-07
15500	1.3405e-07
15600	1.37339e-07
15700	1.3794e-07
15800	1.35209e-07
15900	1.333e-07
16000	1.39983e-07
16100	1.37215e-07
16200	1.41137e-07
16300	1.41829e-07
16400	1.32603e-07
16500	1.3813e-07
16600	1.42777e-07
16700	1.4546e-07
16800	1.43292e-07
16900	1.39843e-07
17000	1.39436e-07
17100	1.37694e-07
17200	1.26484e-07
17300	1.31217e-07
17400	1.34875e-07
17500	1.42046e-07
17600	1.35988e-07
17700	1.31468e-07
17800	1.33765e-07
17900	1.39693e-07
18000	1.43561e-07
18100	1.34626e-07
18200	1.37046e-07
18300	1.29198e-07
18400	1.31456e-07
18500	1.37807e-07
18600	1.35919e-07
18700	1.38995e-07
18800	1.36003e-07
18900	1.35224e-07
19000	1.33752e-07
19100	1.40907e-07
19200	1.44004e-07
19300	1.39628e-07
19400	1.35873e-07
19500	1.35105e-07
19600	1.29239e-07
19700	1.25965e-07
19800	1.39637e-07
19900	1.39092e-07
20000	1.26382e-07
20100	1.35526e-07
20200	1.37472e-07
20300	1.41097e-07
20400	1.43951e-07
20500	1.39847e-07
20600	1.30027e-07
20700	1.43333e-07
20800	1.42248e-07
20900	1.37468e-07
21000	1.36819e-07
21100	1.38912e-07
21200	1.31576e-07
21300	1.32153e-07
21400	1.31077e-07
21500	1.2767e-07
21600	1.26131e-07
21700	1.29791e-07
21800	1.33633e-07
21900	1.37274e-07
22000	1.30189e-07
22100	1.295e-07
22200	1.28385e-07
22300	1.33568e-07
22400	1.47165e-07
22500	1.38884e-07
22600	1.36683e-07
22700	1.41091e-07
22800	1.37542e-07
22900	1.27993e-07
23000	1.39489e-07
23100	1.39977e-07
23200	1.29639e-07
23300	1.28481e-07
23400	1.32849e-07
23500	1.38571e-07
23600	1.39157e-07
23700	1.36674e-07
23800	1.37131e-07
23900	1.42774e-07
24000	1.3858e-07
24100	1.37009e-07
24200	1.27954e-07
24300	1.29612e-07
24400	1.37559e-07
24500	1.32282e-07
24600	1.30084e-07
24700	1.33069e-07
24800	1.37518e-07
24900	1.33e-07
25000	1.40563e-07
25100	1.4307e-07
25200	1.39092e-07
25300	1.32865e-07
25400	1.34786e-07
25500	1.28986e-07
25600	1.3198e-07
25700	1.36027e-07
25800	1.32578e-07
25900	1.30561e-07
26000	1.34315e-07
26100	1.41583e-07
26200	1.41054e-07
26300	1.39624e-07
26400	1.45443e-07
26500	1.41984e-07
26600	1.347e-07
26700	1.38121e-07
26800	1.37751e-07
26900	1.31326e-07
27000	1.36755e-07
27100	1.32839e-07
27200	1.41444e-07
27300	1.35304e-07
27400	1.4329e-07
27500	1.36665e-07
27600	1.33764e-07
27700	1.28778e-07
27800	1.32642e-07
27900	1.34146e-07
28000	1.373e-07
28100	1.31814e-07
28200	1.27879e-07
28300	1.27869e-07
28400	1.32284e-07
28500	1.36709e-07
28600	1.31859e-07
28700	1.3647e-07
28800	1.42178e-07
28900	1.4181e-07
29000	1.46419e-07
29100	1.45341e-07
29200	1.3617e-07
29300	1.29929e-07
29400	1.32143e-07
29500	1.27231e-07
29600	1.23194e-07
29700	1.30644e-07
29800	1.37647e-07
29900	1.3877e-07
30000	1.33129e-07
30100	1.29836e-07
30200	1.30281e-07
30300	1.3231e-07
30400	1.31591e-07
30500	1.30427e-07
30600	1.37809e-07
30700	1.42741e-07
30800	1.33014e-07
30900	1.28131e-07
31000	1.26309e-07
31100	1.27475e-07
31200	1.33933e-07
31300	1.44722e-07
31400	1.32162e-07
31500	1.36076e-07
31600	1.30696e-07
31700	1.31182e-07
31800	1.37515e-07
31900	1.39716e-07
32000	1.33877e-07
32100	1.42129e-07
32200	1.37478e-07
32300	1.28477e-07
32400	1.35691e-07
32500	1.35083e-07
32600	1.29091e-07
32700	1.30935e-07
32800	1.29725e-07
32900	1.2903e-07
33000	1.25375e-07
33100	1.3086e-07
33200	1.36034e-07
33300	1.26887e-07
33400	1.30146e-07
33500	1.3009e-07
33600	1.37445e-07
33700	1.30115e-07
33800	1.29696e-07
33900	1.29884e-07
34000	1.38224e-07
34100	1.47832e-07
34200	1.31513e-07
34300	1.28866e-07
34400	1.28953e-07
34500	1.31802e-07
34600	1.31992e-07
34700	1.32141e-07
34800	1.32503e-07
34900	1.34534e-07
35000	1.33208e-07
35100	1.35457e-07
35200	1.32526e-07
35300	1.27855e-07
35400	1.25271e-07
35500	1.26745e-07
35600	1.25775e-07
35700	1.32089e-07
35800	1.29906e-07
35900	1.31669e-07
36000	1.43694e-07
36100	1.35452e-07
36200	1.27048e-07
36300	1.25623e-07
36400	1.31347e-07
36500	1.38102e-07
36600	1.34448e-07
36700	1.23723e-07
36800	1.27156e-07
36900	1.23485e-07
37000	1.29911e-07
37100	1.23614e-07
37200	1.17164e-07
37300	1.20068e-07
37400	1.31922e-07
37500	1.36183e-07
37600	1.30662e-07
37700	1.27078e-07
37800	1.33399e-07
37900	1.34517e-07
38000	1.39167e-07
38100	1.26617e-07
38200	1.24749e-07
38300	1.26801e-07
38400	1.39128e-07
38500	1.34255e-07
38600	1.26093e-07
38700	1.20227e-07
38800	1.22707e-07
38900	1.26515e-07
39000	1.2268e-07
39100	1.24366e-07
39200	1.31977e-07
39300	1.26872e-07
39400	1.23233e-07
39500	1.29667e-07
39600	1.28482e-07
39700	1.32667e-07
39800	1.29004e-07
39900	1.29723e-07
40000	1.24705e-07
40100	1.26167e-07
40200	1.29879e-07
40300	1.27039e-07
40400	1.31219e-07
40500	1.24209e-07
40600	1.19017e-07
40700	1.34476e-07
40800	1.293e-07
40900	1.23722e-07
41000	1.33886e-07
41100	1.30017e-07
41200	1.24748e-07
41300	1.27576e-07
41400	1.3926e-07
41500	1.40823e-07
41600	1.38532e-07
41700	1.28651e-07
41800	1.27834e-07
41900	1.28277e-07
42000	1.23819e-07
42100	1.24572e-07
42200	1.29182e-07
42300	1.22887e-07
42400	1.19603e-07
42500	1.24439e-07
42600	1.29253e-07
42700	1.31796e-07
42800	1.27023e-07
42900	1.29027e-07
43000	1.2033e-07
43100	1.16471e-07
43200	1.25101e-07
43300	1.34165e-07
43400	1.32408e-07
43500	1.28473e-07
43600	1.29543e-07
43700	1.3285e-07
43800	1.25449e-07
43900	1.27516e-07
44000	1.3088e-07
44100	1.29184e-07
44200	1.24209e-07
44300	1.19864e-07
44400	1.27936e-07
44500	1.29543e-07
44600	1.24555e-07
44700	1.26982e-07
44800	1.23586e-07
44900	1.24544e-07
45000	1.32223e-07
45100	1.28545e-07
45200	1.23512e-07
45300	1.20532e-07
45400	1.30537e-07
45500	1.23121e-07
45600	1.26235e-07
45700	1.32757e-07
45800	1.33537e-07
45900	1.28666e-07
46000	1.24301e-07
46100	1.30515e-07
46200	1.26557e-07
46300	1.24746e-07
46400	1.25992e-07
46500	1.23403e-07
46600	1.27644e-07
46700	1.28764e-07
46800	1.24925e-07
46900	1.30492e-07
47000	1.30712e-07
47100	1.1978e-07
47200	1.24506e-07
47300	1.30426e-07
47400	1.2419e-07
47500	1.22098e-07
47600	1.20241e-07
47700	1.34059e-07
47800	1.39047e-07
47900	1.32059e-07
48000	1.32095e-07
48100	1.22628e-07
48200	1.23889e-07
48300	1.24411e-07
48400	1.21228e-07
48500	1.2487e-07
48600	1.2468e-07
48700	1.26567e-07
48800	1.29837e-07
48900	1.32732e-07
49000	1.24969e-07
49100	1.2395e-07
49200	1.22723e-07
49300	1.18542e-07
49400	1.19125e-07
49500	1.29468e-07
49600	1.23866e-07
49700	1.1479e-07
49800	1.19567e-07
49900	1.2611e-07
50000	1.28893e-07
50100	1.35931e-07
50200	1.36218e-07
50300	1.37671e-07
50400	1.31528e-07
50500	1.2882e-07
50600	1.27984e-07
50700	1.32826e-07
50800	1.34729e-07
50900	1.29652e-07
51000	1.25425e-07
51100	1.33348e-07
51200	1.41565e-07
51300	1.44124e-07
51400	1.40249e-07
51500	1.40821e-07
51600	1.32905e-07
51700	1.3091e-07
51800	1.26767e-07
51900	1.21708e-07
52000	1.36376e-07
52100	1.37948e-07
52200	1.33353e-07
52300	1.2845e-07
52400	1.28637e-07
52500	1.1925e-07
52600	1.12168e-07
52700	1.22734e-07
52800	1.35559e-07
52900	1.31444e-07
53000	1.23523e-07
53100	1.28679e-07
53200	1.23671e-07
53300	1.26779e-07
53400	1.28992e-07
53500	1.29342e-07
53600	1.37655e-07
53700	1.27752e-07
53800	1.23372e-07
53900	1.21705e-07
54000	1.21022e-07
54100	1.22074e-07
54200	1.22871e-07
54300	1.24646e-07
54400	1.29598e-07
54500	1.25599e-07
54600	1.27997e-07
54700	1.18219e-07
54800	1.19526e-07
54900	1.31401e-07
55000	1.34655e-07
55100	1.33481e-07
55200	1.31871e-07
55300	1.27596e-07
55400	1.31565e-07
55500	1.30925e-07
55600	1.27899e-07
55700	1.29352e-07
55800	1.33758e-07
55900	1.23841e-07
56000	1.2377e-07
56100	1.30463e-07
56200	1.26252e-07
56300	1.24289e-07
56400	1.23734e-07
56500	1.29824e-07
56600	1.28373e-07
56700	1.32148e-07
56800	1.29162e-07
56900	1.14449e-07
57000	1.18571e-07
57100	1.20735e-07
57200	1.2073e-07
57300	1.2347e-07
57400	1.30219e-07
57500	1.27884e-07
57600	1.12587e-07
57700	1.17215e-07
57800	1.16562e-07
57900	1.21898e-07
58000	1.2194e-07
58100	1.3381e-07
58200	1.39975e-07
58300	1.33768e-07
58400	1.30027e-07
58500	1.20204e-07
58600	1.21868e-07
58700	1.28941e-07
58800	1.29756e-07
58900	1.26676e-07
59000	1.30562e-07
59100	1.26952e-07
59200	1.37186e-07
59300	1.3103e-07
59400	1.22954e-07
59500	1.21655e-07
59600	1.23993e-07
59700	1.17937e-07
59800	1.16056e-07
59900	1.18902e-07
60000	1.24279e-07
60100	1.3047e-07
60200	1.22109e-07
60300	1.2091e-07
60400	1.26663e-07
60500	1.16554e-07
60600	1.25336e-07
60700	1.23811e-07
60800	1.27797e-07
60900	1.16098e-07
61000	1.15837e-07
61100	1.23041e-07
61200	1.17331e-07
61300	1.16533e-07
61400	1.17946e-07
61500	1.18571e-07
61600	1.22465e-07
61700	1.2201e-07
61800	1.13192e-07
61900	1.20226e-07
62000	1.26109e-07
62100	1.1736e-07
62200	1.21095e-07
62300	1.21284e-07
62400	1.21803e-07
62500	1.17946e-07
62600	1.13284e-07
62700	1.22386e-07
62800	1.29462e-07
62900	1.28264e-07
63000	1.18604e-07
63100	1.24543e-07
63200	1.23648e-07
63300	1.25607e-07
63400	1.26357e-07
63500	1.25125e-07
63600	1.2632e-07
63700	1.2731e-07
63800	1.22483e-07
63900	1.18983e-07
64000	1.23699e-07
64100	1.23054e-07
64200	1.23414e-07
64300	1.18487e-07
64400	1.13615e-07
64500	1.08287e-07
64600	1.19602e-07
64700	1.23735e-07
64800	1.23169e-07
64900	1.14332e-07
65000	1.34587e-07
65100	1.35164e-07
65200	1.28266e-07
65300	1.29531e-07
65400	1.23099e-07
65500	1.20937e-07
65600	1.20507e-07
65700	1.13678e-07
65800	1.13646e-07
65900	1.19175e-07
66000	1.24911e-07
66100	1.27466e-07
66200	1.2709e-07
66300	1.35487e-07
66400	1.29548e-07
66500	1.23061e-07
66600	1.21608e-07
66700	1.20809e-07
66800	1.16746e-07
66900	1.23913e-07
67000	1.34685e-07
67100	1.46879e-07
67200	2.08286e-07
67300	2.50957e-07
67400	2.32034e-07
67500	1.52392e-07
67600	1.26947e-07
67700	1.43579e-07
67800	2.19113e-07
67900	2.46424e-07
68000	4.04835e-07
68100	7.1882e-07
68200	9.74859e-07
68300	8.12607e-06
68400	8.99571e-06
68500	4.43267e-06
68600	1.12748e-06
68700	4.73489e-07
68800	1.8781e-07
68900	1.61092e-07
69000	1.37169e-07
69100	1.25669e-07
69200	1.52228e-07
69300	1.66607e-07
69400	1.70655e-07
69500	1.37622e-07
69600	1.19053e-07
69700	1.17132e-07
69800	1.16162e-07
69900	1.17047e-07
70000	1.2058e-07
70100	1.44527e-07
70200	1.35555e-07
70300	1.29806e-07
70400	1.28997e-07
70500	1.2078e-07
70600	1.2495e-07
70700	1.21963e-07
70800	1.27552e-07
70900	1.17069e-07
71000	1.23577e-07
71100	1.21205e-07
71200	1.14817e-07
71300	1.12888e-07
71400	1.24359e-07
71500	1.19729e-07
71600	1.20469e-07
71700	1.1609e-07
71800	1.14825e-07
71900	1.20027e-07
72000	1.24732e-07
72100	1.14298e-07
72200	1.12334e-07
72300	1.27779e-07
72400	1.27321e-07
72500	1.16784e-07
72600	1.13988e-07
72700	1.1461e-07
72800	1.18193e-07
72900	1.13706e-07
73000	1.15703e-07
73100	1.13631e-07
73200	1.2205e-07
73300	1.18617e-07
73400	1.17936e-07
73500	1.18172e-07
73600	1.18031e-07
73700	1.20725e-07
73800	1.16961e-07
73900	1.21782e-07
74000	1.17862e-07
74100	1.12417e-07
74200	1.12088e-07
74300	1.1787e-07
74400	1.23261e-07
74500	1.18296e-07
74600	1.20852e-07
74700	1.20068e-07
74800	1.23978e-07
74900	1.1282e-07
75000	1.16655e-07
75100	1.20291e-07
75200	1.13972e-07
75300	1.17408e-07
75400	1.21322e-07
75500	1.131e-07
75600	1.01623e-07
75700	1.10906e-07
75800	1.15352e-07
75900	1.20407e-07
76000	1.16671e-07
76100	1.17703e-07
76200	1.23639e-07
76300	1.1734e-07
76400	1.09428e-07
76500	1.09009e-07
76600	1.14521e-07
76700	1.13863e-07
76800	1.11765e-07
76900	1.1602e-07
77000	1.12202e-07
77100	1.22073e-07
77200	1.19176e-07
77300	1.23095e-07
77400	1.23829e-07
77500	1.23294e-07
77600	1.15933e-07
77700	1.14864e-07
77800	1.12955e-07
77900	1.07407e-07
78000	1.14935e-07
78100	1.19658e-07
78200	1.12932e-07
78300	1.15869e-07
78400	1.24584e-07
78500	1.162e-07
78600	1.11761e-07
78700	1.24881e-07
78800	1.30367e-07
78900	1.24525e-07
79000	1.17612e-07
79100	1.11664e-07
79200	1.04552e-07
79300	1.04414e-07
79400	1.13995e-07
79500	1.14342e-07
79600	1.15559e-07
79700	1.1659e-07
79800	1.15813e-07
79900	1.11172e-07
80000	1.04572e-07
80100	1.15688e-07
80200	1.1712e-07
80300	1.12791e-07
80400	1.10495e-07
80500	1.21149e-07
80600	1.25644e-07
80700	1.19625e-07
80800	1.11913e-07
80900	1.1528e-07
81000	1.20117e-07
81100	1.16874e-07
81200	1.13443e-07
81300	1.16899e-07
81400	1.16944e-07
81500	1.18514e-07
81600	1.19772e-07
81700	1.16744e-07
81800	1.15245e-07
81900	1.17165e-07
82000	1.13598e-07
82100	1.14405e-07
82200	1.15441e-07
82300	1.14472e-07
82400	1.0664e-07
82500	1.08536e-07
82600	1.1773e-07
82700	1.17473e-07
82800	1.15704e-07
82900	1.09396e-07
83000	1.19748e-07
83100	1.27867e-07
83200	1.19349e-07
83300	1.17405e-07
83400	1.08456e-07
83500	1.1135e-07
83600	1.20738e-07
83700	1.15987e-07
83800	1.11593e-07
83900	1.16543e-07
84000	1.19158e-07
84100	1.13483e-07
84200	1.14149e-07
84300	1.13923e-07
84400	1.12187e-07
84500	1.14835e-07
84600	1.09657e-07
84700	1.08504e-07
84800	1.19496e-07
84900	1.18895e-07
85000	1.13225e-07
85100	1.15288e-07
85200	1.1081e-07
85300	1.09597e-07
85400	1.10278e-07
85500	1.13477e-07
85600	1.15507e-07
85700	1.09162e-07
85800	1.10633e-07
85900	1.09992e-07
86000	1.07334e-07
86100	1.10175e-07
86200	1.16606e-07
86300	1.12686e-07
86400	1.08399e-07
86500	1.11709e-07
86600	1.08126e-07
86700	1.01981e-07
86800	1.0858e-07
86900	1.20374e-07
87000	1.07116e-07
87100	1.019e-07
87200	1.05876e-07
87300	1.1256e-07
87400	1.11296e-07
87500	1.11951e-07
87600	1.04842e-07
87700	1.00778e-07
87800	1.07068e-07
87900	1.11052e-07
88000	1.19066e-07
88100	1.19963e-07
88200	1.14222e-07
88300	1.15774e-07
88400	1.19975e-07
88500	1.09334e-07
88600	1.11239e-07
88700	1.17733e-07
88800	1.14548e-07
88900	1.17882e-07
89000	1.16428e-07
89100	1.09064e-07
89200	1.13678e-07
89300	1.11996e-07
89400	1.07182e-07
89500	1.0325e-07
89600	1.08262e-07
89700	1.13758e-07
89800	1.16553e-07
89900	1.20547e-07
90000	1.14408e-07
90100	1.09551e-07
90200	1.18636e-07
90300	1.20936e-07
90400	1.05108e-07
90500	1.09788e-07
90600	1.09996e-07
90700	1.11324e-07
90800	1.1954e-07
90900	1.19135e-07
91000	1.17941e-07
91100	1.08737e-07
91200	1.02241e-07
91300	1.05803e-07
91400	1.08864e-07
91500	1.13437e-07
91600	1.1629e-07
91700	1.09528e-07
91800	1.01858e-07
91900	1.02693e-07
92000	1.04485e-07
92100	1.11834e-07
92200	1.11035e-07
92300	1.06471e-07
92400	1.03449e-07
92500	9.80396e-08
92600	1.03529e-07
92700	1.1525e-07
92800	1.14598e-07
92900	1.17658e-07
93000	1.20631e-07
93100	1.08269e-07
93200	1.09738e-07
93300	1.1425e-07
93400	1.12733e-07
93500	1.07536e-07
93600	1.08155e-07
93700	1.12405e-07
93800	1.16003e-07
93900	1.17726e-07
94000	1.04747e-07
94100	1.03044e-07
94200	1.15509e-07
94300	1.16192e-07
94400	1.07516e-07
94500	1.01113e-07
94600	1.06802e-07
94700	1.0767e-07
94800	1.02517e-07
94900	1.04444e-07
95000	1.10676e-07
95100	1.12265e-07
95200	1.10094e-07
95300	1.16203e-07
95400	1.10188e-07
95500	1.05974e-07
95600	1.05573e-07
95700	1.0843e-07
95800	1.11978e-07
95900	1.07895e-07
96000	1.0674e-07
96100	1.02697e-07
96200	9.73749e-08
96300	1.05206e-07
96400	1.12558e-07
96500	1.10404e-07
96600	1.13478e-07
96700	1.10341e-07
96800	1.01866e-07
96900	1.00091e-07
97000	1.01076e-07
97100	1.09871e-07
97200	1.09932e-07
97300	1.03801e-07
97400	1.07367e-07
97500	1.0667e-07
97600	1.08375e-07
97700	1.13398e-07
97800	1.07308e-07
97900	1.0264e-07
98000	1.021e-07
98100	1.11918e-07
98200	1.10855e-07
98300	1.05237e-07
98400	1.07305e-07
98500	1.04665e-07
98600	1.02407e-07
98700	1.05369e-07
98800	1.07299e-07
98900	1.08167e-07
99000	1.19217e-07
99100	1.13302e-07
99200	1.13728e-07
99300	1.06833e-07
99400	1.02373e-07
99500	1.0897e-07
99600	1.15377e-07
99700	1.06933e-07
99800	1.05421e-07
99900	1.07162e-07
100000	1.04272e-07
100100	1.04053e-07
100200	1.0866e-07
100300	1.06409e-07
100400	1.03851e-07
100500	1.16155e-07
100600	1.12779e-07
100700	1.05624e-07
100800	1.14982e-07
100900	1.14001e-07
101000	1.10742e-07
101100	1.07849e-07
101200	1.13109e-07
101300	1.16155e-07
101400	1.09021e-07
101500	1.06462e-07
101600	1.10931e-07
101700	1.09126e-07
101800	1.12046e-07
101900	1.15105e-07
102000	1.09326e-07
102100	1.05422e-07
102200	1.15142e-07
102300	1.0979e-07
102400	1.05651e-07
102500	1.07922e-07
102600	1.08239e-07
102700	1.14304e-07
102800	1.11102e-07
102900	1.14273e-07
103000	1.12233e-07
103100	1.15811e-07
103200	1.07921e-07
103300	1.01073e-07
103400	1.10215e-07
103500	1.01965e-07
103600	9.91764e-08
103700	1.02968e-07
103800	1.06124e-07
103900	1.07359e-07
104000	1.09212e-07
104100	1.00442e-07
104200	9.82413e-08
104300	9.95556e-08
104400	1.10443e-07
104500	1.09085e-07
104600	1.02021e-07
104700	9.97554e-08
104800	1.03227e-07
104900	1.03438e-07
105000	1.02688e-07
105100	1.06392e-07
105200	1.05712e-07
105300	1.06458e-07
105400	1.05123e-07
105500	1.06375e-07
105600	1.07567e-07
105700	1.09322e-07
105800	1.05777e-07
105900	1.05363e-07
106000	1.02522e-07
106100	1.05832e-07
106200	1.04462e-07
106300	1.06096e-07
106400	1.05563e-07
106500	1.01724e-07
106600	9.49272e-08
106700	9.78243e-08
106800	1.07118e-07
106900	1.05329e-07
107000	1.06971e-07
107100	1.022e-07
107200	9.33939e-08
107300	9.84129e-08
107400	1.02723e-07
107500	1.04083e-07
107600	1.01746e-07
107700	9.50716e-08
107800	9.77932e-08
107900	1.00741e-07
108000	1.10169e-07
108100	1.08832e-07
108200	1.0529e-07
108300	1.05638e-07
108400	1.0605e-07
108500	1.09598e-07
108600	1.04202e-07
108700	9.78217e-08
108800	9.58217e-08
108900	9.94222e-08
109000	1.01671e-07
109100	1.07705e-07
109200	1.09578e-07
109300	1.13328e-07
109400	1.02006e-07
109500	1.00726e-07
109600	1.00542e-07
109700	9.92309e-08
109800	1.04475e-07
109900	1.01228e-07
110000	9.97425e-08
110100	9.80847e-08
110200	1.02253e-07
110300	1.08568e-07
110400	1.05741e-07
110500	9.71138e-08
110600	9.69161e-08
110700	1.02643e-07
110800	1.02759e-07
110900	1.04974e-07
111000	9.64912e-08
111100	9.96028e-08
111200	9.67471e-08
111300	1.0278e-07
111400	1.11012e-07
111500	1.09068e-07
111600	9.91001e-08
111700	9.51856e-08
111800	9.99375e-08
111900	9.61531e-08
112000	1.00262e-07
112100	1.01217e-07
112200	1.05975e-07
112300	1.02424e-07
112400	9.78263e-08
112500	9.66036e-08
112600	9.62404e-08
112700	1.05065e-07
112800	1.11414e-07
112900	1.04085e-07
113000	9.58946e-08
113100	9.67982e-08
113200	9.20755e-08
113300	9.14858e-08
113400	1.0225e-07
113500	9.64628e-08
113600	9.76212e-08
113700	9.60496e-08
113800	9.75458e-08
113900	1.04013e-07
114000	1.01773e-07
114100	1.06181e-07
114200	1.06554e-07
114300	1.00473e-07
114400	9.58139e-08
114500	1.03056e-07
114600	1.01225e-07
114700	1.00807e-07
114800	9.7796e-08
114900	1.00144e-07
115000	9.49408e-08
115100	1.01455e-07
115200	1.0696e-07
115300	1.1198e-07
115400	1.07461e-07
115500	9.65015e-08
115600	9.97219e-08
115700	9.83618e-08
115800	9.9829e-08
115900	9.39215e-08
116000	9.62781e-08
116100	9.17586e-08
116200	9.38432e-08
116300	9.56994e-08
116400	9.66882e-08
116500	9.69207e-08
116600	1.01277e-07
116700	9.98285e-08
116800	9.93106e-08
116900	9.94625e-08
117000	1.00065e-07
117100	1.03347e-07
117200	1.04514e-07
117300	9.59171e-08
117400	1.00368e-07
117500	1.02878e-07
117600	9.43951e-08
117700	9.92186e-08
117800	9.85593e-08
117900	1.09227e-07
118000	1.10551e-07
118100	1.08115e-07
118200	1.01401e-07
118300	9.46815e-08
118400	9.69598e-08
118500	9.53104e-08
118600	9.68966e-08
118700	9.82107e-08
118800	9.39941e-08
118900	8.99431e-08
119000	9.48482e-08
119100	9.77034e-08
119200	9.56716e-08
119300	9.81133e-08
119400	9.88843e-08
119500	1.01951e-07
119600	1.01521e-07
119700	9.88738e-08
119800	9.85309e-08
119900	1.04377e-07
120000	1.04044e-07
120100	1.03462e-07
120200	1.03854e-07
120300	1.01766e-07
120400	9.48769e-08
120500	1.02905e-07
120600	1.00683e-07
120700	9.12841e-08
120800	9.33007e-08
120900	9.25602e-08
121000	9.78399e-08
121100	9.74874e-08
121200	9.85232e-08
121300	9.43784e-08
121400	9.41841e-08
121500	9.65692e-08
121600	9.25644e-08
121700	9.15312e-08
121800	9.51833e-08
121900	9.59181e-08
122000	9.63641e-08
122100	9.79337e-08
122200	1.00441e-07
122300	9.46472e-08
122400	9.61122e-08
122500	9.82109e-08
122600	9.69938e-08
122700	1.00004e-07
122800	9.58472e-08
122900	1.05499e-07
123000	9.91295e-08
123100	9.9177e-08
123200	1.01469e-07
123300	9.97659e-08
123400	1.00414e-07
123500	9.4096e-08
123600	9.04889e-08
123700	9.83956e-08
123800	9.47001e-08
123900	9.31796e-08
124000	9.3629e-08
124100	9.88263e-08
124200	9.86816e-08
124300	9.25765e-08
124400	9.45883e-08
124500	8.94694e-08
124600	9.41318e-08
124700	9.84221e-08
124800	9.56065e-08
124900	9.74217e-08
125000	8.97111e-08
125100	9.48172e-08
125200	9.80402e-08
125300	9.63929e-08
125400	9.34385e-08
125500	8.89308e-08
125600	9.47791e-08
125700	9.82349e-08
125800	1.02444e-07
125900	1.00604e-07
126000	9.7043e-08
126100	9.80643e-08
126200	9.65287e-08
126300	1.05397e-07
126400	1.03022e-07
126500	9.37967e-08
126600	9.35272e-08
126700	9.20139e-08
126800	1.02473e-07
126900	1.00327e-07
127000	9.48988e-08
127100	9.17349e-08
127200	9.36274e-08
127300	9.75349e-08
127400	9.31399e-08
127500	1.0142e-07
127600	9.8836e-08
127700	9.70073e-08
127800	9.62504e-08
127900	9.44793e-08
128000	9.40776e-08
128100	9.24381e-08
128200	9.13153e-08
128300	9.64891e-08
128400	9.59443e-08
128500	9.05759e-08
128600	9.18134e-08
128700	9.58668e-08
128800	9.29438e-08
128900	9.18026e-08
129000	1.01328e-07
129100	1.02533e-07
129200	9.61839e-08
129300	1.01173e-07
129400	1.01686e-07
129500	1.03942e-07
129600	9.67597e-08
129700	9.15385e-08
129800	8.93672e-08
129900	8.67607e-08
130000	9.14979e-08
130100	9.63551e-08
130200	9.26969e-08
130300	9.59982e-08
130400	9.42305e-08
130500	9.92398e-08
130600	9.91163e-08
130700	9.26604e-08
130800	9.78793e-08
130900	9.33803e-08
131000	8.82508e-08
131100	9.65622e-08
131200	9.50615e-08
131300	9.44808e-08
131400	9.87469e-08
131500	9.51658e-08
131600	9.2807e-08
131700	1.40034e-07
131800	1.52006e-07
131900	9.58183e-08
132000	9.33442e-08
132100	8.41381e-08
132200	9.40708e-08
132300	9.72583e-08
132400	9.41418e-08
132500	9.13447e-08
132600	9.26653e-08
132700	9.02302e-08
132800	9.50902e-08
132900	9.64058e-08
133000	8.87687e-08
133100	9.3223e-08
133200	9.55214e-08
133300	8.46959e-08
133400	9.40529e-08
133500	1.00157e-07
133600	9.63809e-08
133700	9.70889e-08
133800	9.21102e-08
133900	9.43914e-08
134000	9.45682e-08
134100	1.0166e-07
134200	9.98693e-08
134300	9.61581e-08
134400	9.47991e-08
134500	9.7147e-08
134600	9.68303e-08
134700	9.23779e-08
134800	9.07287e-08
134900	9.79671e-08
135000	9.49631e-08
135100	9.3954e-08
135200	8.85955e-08
135300	9.68323e-08
135400	9.25507e-08
135500	9.41098e-08
135600	9.33247e-08
135700	9.30815e-08
135800	9.19546e-08
135900	9.27684e-08
136000	9.70838e-08
136100	9.44846e-08
136200	9.1811e-08
136300	8.4974e-08
136400	8.65282e-08
136500	8.7032e-08
136600	9.19761e-08
136700	9.06302e-08
136800	9.20633e-08
136900	9.23562e-08
137000	8.84364e-08
137100	9.15011e-08
137200	8.8408e-08
137300	9.51007e-08
137400	8.80622e-08
137500	8.82059e-08
137600	9.13008e-08
137700	8.69743e-08
137800	8.96739e-08
137900	9.05206e-08
138000	8.72093e-08
138100	9.17302e-08
138200	9.31095e-08
138300	9.36797e-08
138400	9.13412e-08
138500	9.3743e-08
138600	9.21942e-08
138700	9.15368e-08
138800	8.32529e-08
138900	8.07452e-08
139000	9.01725e-08
139100	9.23093e-08
139200	9.08174e-08
139300	8.60417e-08
139400	8.47684e-08
139500	9.48522e-08
139600	8.60459e-08
139700	8.43987e-08
139800	8.57077e-08
139900	8.12214e-08
140000	8.72244e-08
140100	8.86571e-08
140200	8.67125e-08
140300	8.85785e-08
140400	9.24639e-08
140500	9.12602e-08
140600	8.95759e-08
140700	9.00268e-08
140800	8.52527e-08
140900	8.98217e-08
141000	8.81802e-08
141100	8.77278e-08
141200	8.08792e-08
141300	7.97709e-08
141400	8.37825e-08
141500	9.059e-08
141600	8.97413e-08
141700	8.74167e-08
141800	8.36226e-08
141900	8.2822e-08
142000	8.6031e-08
142100	8.29003e-08
142200	8.92033e-08
142300	9.45687e-08
142400	8.38338e-08
142500	8.43463e-08
142600	8.34413e-08
142700	9.47227e-08
142800	9.71944e-08
142900	9.27021e-08
143000	9.08292e-08
143100	9.52465e-08
143200	8.88884e-08
143300	8.55709e-08
143400	8.45377e-08
143500	8.91633e-08
143600	9.19515e-08
143700	9.17505e-08
143800	9.30724e-08
143900	9.34455e-08
144000	8.29025e-08
144100	8.65391e-08
144200	9.40715e-08
144300	8.56032e-08
144400	8.30691e-08
144500	8.22068e-08
144600	8.51391e-08
144700	7.61295e-08
144800	7.84932e-08
144900	8.47073e-08
145000	8.59077e-08
145100	8.18428e-08
145200	7.63396e-08
145300	8.45357e-08
145400	8.73343e-08
145500	8.23394e-08
145600	8.92852e-08
145700	8.6531e-08
145800	7.92147e-08
145900	8.47027e-08
146000	9.03677e-08
146100	9.0851e-08
146200	8.86534e-08
146300	8.27708e-08
146400	8.47605e-08
146500	8.56842e-08
146600	9.00419e-08
146700	8.73872e-08
146800	8.46787e-08
146900	8.68644e-08
147000	9.08982e-08
147100	8.76887e-08
147200	9.07868e-08
147300	8.74582e-08
147400	8.66403e-08
147500	8.6065e-08
147600	8.53703e-08
147700	8.36873e-08
147800	7.95262e-08
147900	8.57471e-08
148000	8.10211e-08
148100	8.34612e-08
148200	8.32546e-08
148300	8.75504e-08
148400	9.03756e-08
148500	9.0839e-08
148600	8.62496e-08
148700	8.64842e-08
148800	8.69774e-08
148900	8.56804e-08
149000	8.25921e-08
149100	8.19302e-08
149200	8.03887e-08
149300	8.22352e-08
149400	8.98692e-08
149500	8.88921e-08
149600	8.92577e-08
149700	8.95288e-08
149800	8.12825e-08
149900	8.02273e-08
150000	8.37366e-08
150100	8.46344e-08
150200	8.65513e-08
150300	7.92735e-08
150400	8.95836e-08
150500	9.08647e-08
150600	8.45129e-08
150700	8.19959e-08
150800	8.64236e-08
150900	8.45667e-08
151000	8.42668e-08
151100	8.27441e-08
151200	7.91985e-08
151300	7.90786e-08
151400	8.38451e-08
151500	8.31517e-08
151600	8.8053e-08
151700	8.39492e-08
151800	8.33116e-08
151900	8.09464e-08
152000	7.89216e-08
152100	8.41421e-08
152200	8.94959e-08
152300	8.44963e-08
152400	8.27086e-08
152500	8.14741e-08
152600	8.19276e-08
152700	8.39553e-08
152800	8.48826e-08
152900	8.06477e-08
153000	8.0364e-08
153100	8.24309e-08
153200	8.21684e-08
153300	8.64403e-08
153400	8.00857e-08
153500	7.82728e-08
153600	8.35252e-08
153700	8.7702e-08
153800	8.37479e-08
153900	8.24747e-08
154000	8.35098e-08
154100	8.11059e-08
154200	8.75074e-08
154300	8.13013e-08
154400	7.73052e-08
154500	8.37241e-08
154600	8.48474e-08
154700	8.16307e-08
154800	8.40386e-08
154900	8.13296e-08
155000	7.92479e-08
155100	8.13159e-08
155200	8.22423e-08
155300	8.29271e-08
155400	8.20988e-08
155500	8.25552e-08
155600	8.56902e-08
155700	8.63586e-08
155800	8.20695e-08
155900	7.99907e-08
156000	8.13443e-08
156100	8.0958e-08
156200	8.3382e-08
156300	8.90029e-08
156400	8.76079e-08
156500	9.14416e-08
156600	8.63966e-08
156700	8.43028e-08
156800	8.01404e-08
156900	8.13249e-08
157000	8.00246e-08
157100	8.42975e-08
157200	8.54088e-08
157300	7.86608e-08
157400	8.05806e-08
157500	8.46991e-08
157600	8.00357e-08
157700	8.04534e-08
157800	7.94506e-08
157900	7.78996e-08
158000	7.86764e-08
158100	8.04606e-08
158200	7.77061e-08
158300	7.98122e-08
158400	7.68275e-08
158500	8.09252e-08
158600	8.0885e-08
158700	8.08822e-08
158800	8.24724e-08
158900	8.42078e-08
159000	7.86092e-08
159100	8.01238e-08
159200	8.17171e-08
159300	8.07831e-08
159400	7.83231e-08
159500	8.50841e-08
159600	7.95875e-08
159700	8.59711e-08
159800	8.5109e-08
159900	8.13979e-08
160000	8.1274e-08
160100	8.23425e-08
160200	7.88435e-08
160300	8.39528e-08
160400	8.41807e-08
160500	8.01921e-08
160600	8.01247e-08
160700	7.57785e-08
160800	7.24287e-08
160900	7.66046e-08
161000	7.58916e-08
161100	7.49399e-08
161200	7.91921e-08
161300	8.28087e-08
161400	8.04661e-08
161500	7.60455e-08
161600	7.25854e-08
161700	7.69108e-08
161800	8.18403e-08
161900	8.39143e-08
162000	8.32205e-08
162100	7.9258e-08
162200	7.87743e-08
162300	7.60861e-08
162400	7.83967e-08
162500	8.23114e-08
162600	8.00683e-08
162700	7.82045e-08
162800	7.47555e-08
162900	7.80262e-08
163000	7.68352e-08
163100	8.04229e-08
163200	7.97206e-08
163300	7.42173e-08
163400	7.43431e-08
163500	7.49508e-08
163600	8.08372e-08
163700	8.57427e-08
163800	7.93493e-08
163900	7.79619e-08
164000	7.37072e-08
164100	7.52547e-08
164200	7.5597e-08
164300	7.79685e-08
164400	8.13581e-08
164500	8.46305e-08
164600	8.38243e-08
164700	7.89312e-08
164800	7.83932e-08
164900	7.98628e-08
165000	7.64698e-08
165100	7.40639e-08
165200	7.3688e-08
165300	7.95268e-08
165400	8.1475e-08
165500	7.95652e-08
165600	7.80267e-08
165700	8.0718e-08
165800	7.93259e-08
165900	7.9556e-08
166000	7.64318e-08
166100	7.65621e-08
166200	7.8405e-08
166300	7.77334e-08
166400	7.61177e-08
166500	7.68642e-08
166600	8.04714e-08
166700	8.20715e-08
166800	7.85809e-08
166900	7.6426e-08
167000	7.32335e-08
167100	7.76974e-08
167200	7.80331e-08
167300	7.6211e-08
167400	7.52599e-08
167500	7.15182e-08
167600	7.56133e-08
167700	7.77143e-08
167800	7.68686e-08
167900	7.29847e-08
168000	7.84283e-08
168100	8.23076e-08
168200	7.34744e-08
168300	7.08434e-08
168400	7.37359e-08
168500	7.67801e-08
168600	7.79538e-08
168700	7.5353e-08
168800	8.15357e-08
168900	8.12232e-08
169000	7.85713e-08
169100	8.18908e-08
169200	8.08589e-08
169300	7.74321e-08
169400	7.38949e-08
169500	7.47217e-08
169600	7.4026e-08
169700	7.6798e-08
169800	7.83602e-08
169900	7.67016e-08
170000	7.80544e-08
170100	7.83559e-08
170200	8.06157e-08
170300	8.36016e-08
170400	8.00746e-08
170500	8.20804e-08
170600	7.94137e-08
170700	7.55661e-08
170800	8.191e-08
170900	8.22116e-08
171000	7.81175e-08
171100	7.94586e-08
171200	7.85895e-08
171300	7.56964e-08
171400	7.73434e-08
171500	7.64085e-08
171600	7.97266e-08
171700	7.6853e-08
171800	7.93209e-08
171900	7.67592e-08
172000	7.29637e-08
172100	7.74444e-08
172200	8.06074e-08
172300	8.2212e-08
172400	8.19852e-08
172500	8.22211e-08
172600	7.77424e-08
172700	7.91386e-08
172800	7.81607e-08
172900	7.42001e-08
173000	7.52971e-08
173100	7.64864e-08
173200	7.12616e-08
173300	7.43918e-08
173400	6.92148e-08
173500	7.31893e-08
173600	7.10327e-08
173700	7.77927e-08
173800	7.60189e-08
173900	7.24249e-08
174000	7.67265e-08
174100	7.46091e-08
174200	7.35517e-08
174300	7.90607e-08
174400	8.00892e-08
174500	7.13924e-08
174600	7.32204e-08
174700	7.42396e-08
174800	7.74751e-08
174900	7.60071e-08
175000	7.68281e-08
175100	7.59495e-08
175200	7.59513e-08
175300	7.34435e-08
175400	7.04387e-08
175500	7.03372e-08
175600	7.53304e-08
175700	7.65049e-08
175800	7.54113e-08
175900	7.27893e-08
176000	6.83508e-08
176100	7.59749e-08
176200	8.11435e-08
176300	8.20021e-08
176400	8.13372e-08
176500	7.47349e-08
176600	7.79925e-08
176700	7.51098e-08
176800	7.05513e-08
176900	7.4277e-08
177000	7.29784e-08
177100	7.06532e-08
177200	7.60577e-08
177300	7.58022e-08
177400	6.73017e-08
177500	6.61939e-08
177600	6.65618e-08
177700	7.13764e-08
177800	7.30882e-08
177900	6.88729e-08
178000	7.43826e-08
178100	7.47599e-08
178200	7.3136e-08
178300	7.41147e-08
178400	7.289e-08
178500	7.43229e-08
178600	6.94672e-08
178700	7.30323e-08
178800	7.15766e-08
178900	7.69561e-08
179000	7.49111e-08
179100	7.39439e-08
179200	7.18824e-08
179300	7.16051e-08
179400	7.16603e-08
179500	7.24483e-08
179600	7.11407e-08
179700	7.8584e-08
179800	7.95762e-08
179900	7.482e-08
180000	7.89154e-08
180100	7.36808e-08
180200	7.10759e-08
180300	7.24243e-08
180400	7.43744e-08
180500	7.81842e-08
180600	7.87345e-08
180700	7.9919e-08
180800	7.97166e-08
180900	7.87652e-08
181000	7.1789e-08
181100	7.01149e-08
181200	7.41054e-08
181300	7.3117e-08
181400	7.17516e-08
181500	7.26674e-08
181600	7.40892e-08
181700	7.66051e-08
181800	7.39844e-08
181900	7.80485e-08
182000	7.65987e-08
182100	7.47858e-08
182200	7.06959e-08
182300	7.31249e-08
182400	7.51688e-08
182500	7.68304e-08
182600	6.66572e-08
182700	7.19587e-08
182800	7.47547e-08
182900	7.07946e-08
183000	6.95935e-08
183100	7.26695e-08
183200	7.421e-08
183300	7.67748e-08
183400	8.09895e-08
183500	7.8545e-08
183600	7.798e-08
183700	7.32817e-08
183800	6.95677e-08
183900	7.1186e-08
184000	7.22258e-08
184100	7.28343e-08
184200	7.50351e-08
184300	7.60266e-08
184400	7.48506e-08
184500	7.76749e-08
184600	7.69551e-08
184700	7.10173e-08
184800	6.94945e-08
184900	6.89033e-08
185000	6.98845e-08
185100	7.08677e-08
185200	7.30799e-08
185300	6.92665e-08
185400	6.76078e-08
185500	6.88645e-08
185600	7.25991e-08
185700	7.32533e-08
185800	6.69461e-08
185900	6.9631e-08
186000	7.1398e-08
186100	7.29136e-08
186200	7.92599e-08
186300	7.48358e-08
186400	7.51353e-08
186500	7.77291e-08
186600	7.96135e-08
186700	7.39112e-08
186800	7.48072e-08
186900	8.0506e-08
187000	7.44746e-08
187100	7.27673e-08
187200	7.32995e-08
187300	7.22741e-08
187400	7.38346e-08
187500	7.42371e-08
187600	7.35009e-08
187700	7.30179e-08
187800	7.25567e-08
187900	6.96363e-08
188000	7.25666e-08
188100	7.3447e-08
188200	6.76856e-08
188300	6.42127e-08
188400	7.00628e-08
188500	7.36014e-08
188600	6.87091e-08
188700	6.54476e-08
188800	6.60841e-08
188900	6.67811e-08
189000	6.90191e-08
189100	7.15626e-08
189200	7.17621e-08
189300	6.76158e-08
189400	6.88821e-08
189500	7.40902e-08
189600	7.26433e-08
189700	7.33701e-08
189800	7.25826e-08
189900	6.61636e-08
190000	6.61533e-08
190100	6.63876e-08
190200	7.11798e-08
190300	7.24867e-08
190400	7.17303e-08
190500	6.95354e-08
190600	7.21823e-08
190700	7.49343e-08
190800	7.19451e-08
190900	7.80901e-08
191000	7.37938e-08
191100	7.02156e-08
191200	6.69397e-08
191300	6.35846e-08
191400	6.7313e-08
191500	7.05984e-08
191600	7.08613e-08
191700	7.37759e-08
191800	7.02782e-08
191900	6.71294e-08
192000	7.20801e-08
192100	7.34062e-08
192200	7.43096e-08
192300	7.19243e-08
192400	6.79175e-08
192500	7.00828e-08
192600	7.29318e-08
192700	7.13911e-08
192800	6.84306e-08
192900	7.0108e-08
193000	6.74674e-08
193100	6.42809e-08
193200	6.40731e-08
193300	6.57842e-08
193400	6.89174e-08
193500	6.28688e-08
193600	6.40127e-08
193700	6.8506e-08
193800	6.69959e-08
193900	6.89749e-08
194000	6.96112e-08
194100	7.37485e-08
194200	7.25489e-08
194300	7.23146e-08
194400	6.96258e-08
194500	7.05618e-08
194600	6.96397e-08
194700	7.17585e-08
194800	6.91295e-08
194900	6.76836e-08
195000	6.79495e-08
195100	6.92367e-08
195200	6.86167e-08
195300	6.85893e-08
195400	6.77973e-08
195500	6.99789e-08
195600	7.06713e-08
195700	6.99111e-08
195800	6.81955e-08
195900	6.6385e-08
196000	7.36135e-08
196100	6.90217e-08
196200	6.96022e-08
196300	7.17936e-08
196400	6.79267e-08
196500	6.32728e-08
196600	6.4533e-08
196700	6.96359e-08
196800	7.58386e-08
196900	6.82673e-08
197000	6.59025e-08
197100	6.96081e-08
197200	6.79459e-08
197300	6.58101e-08
197400	6.47952e-08
197500	6.40627e-08
197600	6.23094e-08
197700	6.36506e-08
197800	6.80788e-08
197900	6.85462e-08
198000	6.70027e-08
198100	6.61484e-08
198200	6.49617e-08
198300	6.73144e-08
198400	6.8401e-08
198500	6.59673e-08
198600	6.83902e-08
198700	6.79121e-08
198800	6.59494e-08
198900	7.34869e-08
199000	7.3048e-08
199100	7.36027e-08
199200	6.99283e-08
199300	6.56415e-08
199400	6.95223e-08
199500	7.06003e-08
199600	7.12527e-08
199700	7.21971e-08
[truncated: 1,002 more rows]
