# Supplementary material for: Electron pairing in the pseudogap state revealed by shot noise in copper oxide junctions
Source: Springer Nature journal article supplement (doi:10.1038/s41586-019-1486-7), 2019-08-21
Supplement: MOESM8 [file 41586_2019_1486_MOESM8_ESM.xlsx]

## Sheet: Sheet1
300K_3S
Freq(Hz)	Sv (arb.)
0	-3.02614e-08
100	4.15225e-07
200	9.96955e-07
300	2.2696e-07
400	1.97908e-07
500	1.81348e-07
600	1.64083e-07
700	1.50936e-07
800	1.43534e-07
900	1.18877e-07
1000	9.4454e-08
1100	1.32832e-07
1200	1.53845e-07
1300	1.51895e-07
1400	1.28739e-07
1500	1.0411e-07
1600	1.16113e-07
1700	1.36486e-07
1800	1.31944e-07
1900	1.34264e-07
2000	1.26509e-07
2100	1.11775e-07
2200	1.05608e-07
2300	1.24882e-07
2400	1.34345e-07
2500	1.23358e-07
2600	1.26503e-07
2700	1.39228e-07
2800	1.14228e-07
2900	1.12758e-07
3000	1.07847e-07
3100	1.21923e-07
3200	1.21061e-07
3300	1.07361e-07
3400	1.17907e-07
3500	1.26731e-07
3600	1.38565e-07
3700	1.33431e-07
3800	1.16519e-07
3900	1.12811e-07
4000	1.19139e-07
4100	1.36542e-07
4200	1.11222e-07
4300	1.19862e-07
4400	1.5311e-07
4500	1.4931e-07
4600	1.14111e-07
4700	1.09224e-07
4800	1.22925e-07
4900	1.1977e-07
5000	1.30729e-07
5100	1.05515e-07
5200	1.08752e-07
5300	1.30926e-07
5400	1.36529e-07
5500	1.23271e-07
5600	1.26841e-07
5700	1.23172e-07
5800	1.02226e-07
5900	1.1012e-07
6000	1.15291e-07
6100	1.07423e-07
6200	9.38454e-08
6300	1.24889e-07
6400	1.28959e-07
6500	1.30252e-07
6600	1.21747e-07
6700	1.16445e-07
6800	1.47373e-07
6900	1.38705e-07
7000	1.4168e-07
7100	1.24796e-07
7200	1.29018e-07
7300	1.26834e-07
7400	1.12825e-07
7500	1.02149e-07
7600	1.3193e-07
7700	1.31966e-07
7800	1.24243e-07
7900	1.05197e-07
8000	9.98597e-08
8100	1.34244e-07
8200	1.1904e-07
8300	1.14134e-07
8400	1.34872e-07
8500	1.16339e-07
8600	9.88275e-08
8700	1.22932e-07
8800	1.25215e-07
8900	1.2416e-07
9000	1.1954e-07
9100	1.2253e-07
9200	1.1683e-07
9300	1.16926e-07
9400	1.35535e-07
9500	1.32883e-07
9600	1.29351e-07
9700	1.30679e-07
9800	1.25784e-07
9900	1.33845e-07
10000	1.28963e-07
10100	1.25342e-07
10200	1.18742e-07
10300	1.2932e-07
10400	1.0896e-07
10500	1.15684e-07
10600	1.22567e-07
10700	9.48139e-08
10800	1.2329e-07
10900	1.3691e-07
11000	1.37929e-07
11100	1.29878e-07
11200	9.71276e-08
11300	1.14303e-07
11400	1.21684e-07
11500	1.3689e-07
11600	1.13187e-07
11700	1.17351e-07
11800	1.54533e-07
11900	1.38484e-07
12000	1.26383e-07
12100	1.1531e-07
12200	1.14901e-07
12300	1.33404e-07
12400	1.39261e-07
12500	1.37867e-07
12600	1.33687e-07
12700	1.18508e-07
12800	1.01658e-07
12900	1.09047e-07
13000	1.24709e-07
13100	1.42161e-07
13200	1.21124e-07
13300	1.28222e-07
13400	1.50735e-07
13500	1.19712e-07
13600	1.34952e-07
13700	1.27987e-07
13800	1.08949e-07
13900	1.16639e-07
14000	1.12431e-07
14100	1.23956e-07
14200	9.89455e-08
14300	9.67711e-08
14400	1.0688e-07
14500	1.09322e-07
14600	1.13602e-07
14700	1.1065e-07
14800	9.9811e-08
14900	1.07371e-07
15000	8.73986e-08
15100	1.34896e-07
15200	1.30935e-07
15300	1.15804e-07
15400	1.36949e-07
15500	1.35072e-07
15600	1.33922e-07
15700	1.136e-07
15800	9.12049e-08
15900	1.2365e-07
16000	1.29822e-07
16100	1.02733e-07
16200	9.36364e-08
16300	9.87548e-08
16400	1.15777e-07
16500	1.22427e-07
16600	1.18786e-07
16700	9.31074e-08
16800	1.04863e-07
16900	1.37818e-07
17000	1.36397e-07
17100	1.45103e-07
17200	1.20318e-07
17300	1.16206e-07
17400	1.17278e-07
17500	1.4282e-07
17600	1.33752e-07
17700	1.17048e-07
17800	1.11747e-07
17900	1.19927e-07
18000	1.00983e-07
18100	1.06843e-07
18200	1.24307e-07
18300	1.21365e-07
18400	9.99503e-08
18500	1.20208e-07
18600	1.36866e-07
18700	1.30617e-07
18800	1.16384e-07
18900	1.23425e-07
19000	1.24402e-07
19100	1.20372e-07
19200	1.07401e-07
19300	1.10175e-07
19400	1.10583e-07
19500	1.20915e-07
19600	1.06611e-07
19700	1.13811e-07
19800	9.65896e-08
19900	9.80284e-08
20000	1.25575e-07
20100	1.26401e-07
20200	1.28476e-07
20300	1.41461e-07
20400	1.22629e-07
20500	1.28898e-07
20600	9.65993e-08
20700	1.024e-07
20800	1.35653e-07
20900	1.33388e-07
21000	1.24466e-07
21100	1.25697e-07
21200	1.26599e-07
21300	9.73585e-08
21400	1.20026e-07
21500	1.217e-07
21600	1.27332e-07
21700	1.31997e-07
21800	1.40241e-07
21900	1.27156e-07
22000	1.36797e-07
22100	1.06347e-07
22200	8.85155e-08
22300	1.13365e-07
22400	1.28371e-07
22500	1.19853e-07
22600	1.18272e-07
22700	1.11126e-07
22800	1.13732e-07
22900	1.21534e-07
23000	1.18538e-07
23100	1.17695e-07
23200	1.03967e-07
23300	8.92422e-08
23400	9.76324e-08
23500	1.04671e-07
23600	1.07126e-07
23700	1.1859e-07
23800	1.12087e-07
23900	1.13076e-07
24000	1.2498e-07
24100	1.29781e-07
24200	1.24735e-07
24300	1.19456e-07
24400	1.42945e-07
24500	1.31105e-07
24600	1.21993e-07
24700	1.23758e-07
24800	1.0499e-07
24900	1.0504e-07
25000	1.31751e-07
25100	1.28611e-07
25200	1.37013e-07
25300	1.46466e-07
25400	1.10106e-07
25500	9.88073e-08
25600	1.12978e-07
25700	1.14082e-07
25800	1.28167e-07
25900	1.33281e-07
26000	1.67059e-07
26100	1.40029e-07
26200	1.06047e-07
26300	9.72361e-08
26400	1.07028e-07
26500	1.127e-07
26600	1.24758e-07
26700	1.10606e-07
26800	1.08791e-07
26900	1.22587e-07
27000	1.31214e-07
27100	1.33129e-07
27200	1.19969e-07
27300	1.02117e-07
27400	1.26134e-07
27500	1.11061e-07
27600	1.09157e-07
27700	1.06973e-07
27800	1.17749e-07
27900	1.15354e-07
28000	1.09771e-07
28100	1.22498e-07
28200	1.21751e-07
28300	1.13433e-07
28400	9.93955e-08
28500	1.20311e-07
28600	1.18401e-07
28700	1.01066e-07
28800	1.09776e-07
28900	1.2092e-07
29000	1.0174e-07
29100	1.00494e-07
29200	1.17259e-07
29300	1.05476e-07
29400	1.10414e-07
29500	1.19287e-07
29600	1.14729e-07
29700	1.05973e-07
29800	1.11818e-07
29900	1.11989e-07
30000	1.20469e-07
30100	1.21508e-07
30200	1.30406e-07
30300	1.2975e-07
30400	1.24097e-07
30500	1.28185e-07
30600	1.33645e-07
30700	1.18194e-07
30800	7.66745e-08
30900	1.16867e-07
31000	1.1361e-07
31100	1.03506e-07
31200	9.03873e-08
31300	9.87823e-08
31400	9.9944e-08
31500	9.79312e-08
31600	1.3674e-07
31700	1.327e-07
31800	1.04251e-07
31900	1.04171e-07
32000	1.10479e-07
32100	1.29233e-07
32200	1.13238e-07
32300	1.09947e-07
32400	1.41368e-07
32500	1.40949e-07
32600	1.15983e-07
32700	1.24222e-07
32800	1.30085e-07
32900	1.08242e-07
33000	1.13432e-07
33100	1.18194e-07
33200	1.28367e-07
33300	1.26591e-07
33400	1.23897e-07
33500	1.29871e-07
33600	1.30831e-07
33700	1.17199e-07
33800	1.32913e-07
33900	1.48151e-07
34000	1.45831e-07
34100	1.45123e-07
34200	1.30713e-07
34300	1.05741e-07
34400	1.28445e-07
34500	1.20158e-07
34600	1.20179e-07
34700	1.30856e-07
34800	1.28156e-07
34900	1.19851e-07
35000	1.20098e-07
35100	1.10408e-07
35200	1.06839e-07
35300	1.1573e-07
35400	1.2061e-07
35500	1.31055e-07
35600	1.19356e-07
35700	1.16409e-07
35800	1.09339e-07
35900	1.36192e-07
36000	1.2677e-07
36100	1.09653e-07
36200	1.23974e-07
36300	1.24073e-07
36400	1.17281e-07
36500	1.0126e-07
36600	1.19032e-07
36700	1.16112e-07
36800	1.24466e-07
36900	2.26767e-06
37000	1.42796e-05
37100	5.7763e-06
37200	1.38564e-07
37300	1.12097e-07
37400	1.22249e-07
37500	1.23373e-07
37600	1.28378e-07
37700	1.26708e-07
37800	1.16876e-07
37900	1.07694e-07
38000	1.10876e-07
38100	1.36722e-07
38200	1.24752e-07
38300	1.10044e-07
38400	1.07759e-07
38500	1.21949e-07
38600	1.29472e-07
38700	1.25854e-07
38800	1.14644e-07
38900	1.06349e-07
39000	1.14653e-07
39100	1.07431e-07
39200	9.88747e-08
39300	1.12848e-07
39400	1.24323e-07
39500	1.3976e-07
39600	1.35572e-07
39700	1.18789e-07
39800	1.18742e-07
39900	1.22761e-07
40000	1.12031e-07
40100	1.18346e-07
40200	1.37256e-07
40300	1.16428e-07
40400	1.36137e-07
40500	1.51105e-07
40600	1.44471e-07
40700	1.22881e-07
40800	1.08643e-07
40900	1.33724e-07
41000	1.14267e-07
41100	1.12177e-07
41200	1.22059e-07
41300	1.34646e-07
41400	1.51464e-07
41500	3.11486e-07
41600	1.07333e-06
41700	3.1046e-06
41800	6.2413e-06
41900	6.48456e-06
42000	3.5199e-06
42100	7.08523e-06
42200	1.10168e-05
42300	2.60581e-05
42400	1.56932e-05
42500	9.4513e-06
42600	1.42035e-05
42700	7.54639e-06
42800	1.70719e-06
42900	3.72542e-07
43000	1.43503e-07
43100	1.25109e-07
43200	1.01721e-07
43300	2.1296e-07
43400	2.94022e-07
43500	1.23392e-07
43600	1.0937e-07
43700	1.02248e-07
43800	9.1328e-08
43900	1.1157e-07
44000	1.21278e-07
44100	1.33615e-07
44200	1.45391e-07
44300	1.07809e-07
44400	1.19448e-07
44500	1.25906e-07
44600	1.21773e-07
44700	1.13748e-07
44800	1.09649e-07
44900	2.522e-07
45000	3.18087e-07
45100	1.26579e-07
45200	1.14985e-07
45300	1.13638e-07
45400	9.27226e-08
45500	1.28323e-07
45600	1.21472e-07
45700	1.28229e-07
45800	1.54755e-07
45900	1.37233e-07
46000	1.21045e-07
46100	1.41767e-07
46200	1.19447e-07
46300	1.22368e-07
46400	1.66919e-07
46500	1.40418e-07
46600	1.0439e-07
46700	1.05629e-07
46800	1.02983e-07
46900	1.10223e-07
47000	1.13746e-07
47100	1.16916e-07
47200	1.29993e-07
47300	1.33165e-07
47400	1.18268e-07
47500	1.12534e-07
47600	1.28163e-07
47700	1.2183e-07
47800	1.02777e-07
47900	1.12222e-07
48000	1.36e-07
48100	1.32892e-07
48200	9.20455e-08
48300	1.03582e-07
48400	1.16886e-07
48500	1.43841e-07
48600	1.54984e-07
48700	1.01552e-07
48800	1.00649e-07
48900	1.13396e-07
49000	1.12749e-07
49100	1.15316e-07
49200	1.35542e-07
49300	1.48703e-07
49400	1.35812e-07
49500	1.23434e-07
49600	1.22511e-07
49700	1.22432e-07
49800	1.11155e-07
49900	1.32695e-07
50000	1.25875e-07
50100	1.00267e-07
50200	1.42782e-07
50300	1.47268e-07
50400	1.3684e-07
50500	1.00097e-07
50600	1.10019e-07
50700	1.2346e-07
50800	1.20256e-07
50900	1.29335e-07
51000	1.06098e-07
51100	1.33718e-07
51200	1.43528e-07
51300	1.5088e-07
51400	1.38505e-07
51500	1.51952e-07
51600	1.4772e-07
51700	1.5098e-07
51800	1.59722e-07
51900	1.25763e-07
52000	1.26569e-07
52100	1.30283e-07
52200	1.07359e-07
52300	1.04528e-07
52400	1.11231e-07
52500	1.11652e-07
52600	1.07807e-07
52700	1.26216e-07
52800	1.2213e-07
52900	1.12599e-07
53000	1.39843e-07
53100	1.40253e-07
53200	1.21029e-07
53300	1.20683e-07
53400	1.30571e-07
53500	1.1143e-07
53600	1.27407e-07
53700	1.16989e-07
53800	1.01932e-07
53900	1.29031e-07
54000	1.18528e-07
54100	1.2271e-07
54200	1.29586e-07
54300	1.18693e-07
54400	1.07891e-07
54500	1.08462e-07
54600	9.05905e-08
54700	9.8709e-08
54800	1.13997e-07
54900	1.37341e-07
55000	1.34544e-07
55100	1.17408e-07
55200	1.35343e-07
55300	1.34319e-07
55400	1.3757e-07
55500	1.30399e-07
55600	1.50088e-07
55700	1.35935e-07
55800	9.8636e-08
55900	9.7419e-08
56000	1.18462e-07
56100	1.04691e-07
56200	1.02504e-07
56300	1.20155e-07
56400	1.33639e-07
56500	1.21802e-07
56600	1.18832e-07
56700	1.16996e-07
56800	1.06101e-07
56900	1.12889e-07
57000	1.17032e-07
57100	1.19449e-07
57200	1.114e-07
57300	1.24546e-07
57400	1.07006e-07
57500	1.1141e-07
57600	1.15144e-07
57700	1.15578e-07
57800	1.26284e-07
57900	1.3609e-07
58000	1.22059e-07
58100	1.00332e-07
58200	9.07549e-08
58300	1.03863e-07
58400	1.24639e-07
58500	1.30972e-07
58600	1.24722e-07
58700	1.0498e-07
58800	1.11342e-07
58900	1.1824e-07
59000	1.24902e-07
59100	1.01682e-07
59200	1.04761e-07
59300	1.24747e-07
59400	1.10156e-07
59500	1.25151e-07
59600	1.18465e-07
59700	1.5242e-07
59800	4.64358e-06
59900	3.40937e-05
60000	1.53124e-05
60100	2.3107e-07
60200	1.16296e-07
60300	1.16238e-07
60400	1.17798e-07
60500	1.20236e-07
60600	1.15788e-07
60700	1.18976e-07
60800	1.1782e-07
60900	1.18422e-07
61000	1.19302e-07
61100	1.32072e-07
61200	1.35594e-07
61300	1.50076e-07
61400	1.27204e-07
61500	1.04852e-07
61600	1.10319e-07
61700	1.27538e-07
61800	1.18276e-07
61900	1.06286e-07
62000	1.2233e-07
62100	1.16823e-07
62200	1.02069e-07
62300	1.05256e-07
62400	1.22266e-07
62500	1.41112e-07
62600	1.47258e-07
62700	1.28224e-07
62800	1.04214e-07
62900	1.06803e-07
63000	9.42709e-08
63100	9.8686e-08
63200	1.01019e-07
63300	8.4664e-08
63400	9.38502e-08
63500	1.09821e-07
63600	9.91573e-08
63700	1.19916e-07
63800	1.28973e-07
63900	1.12374e-07
64000	1.15776e-07
64100	1.09698e-07
64200	1.18473e-07
64300	1.30785e-07
64400	1.19814e-07
64500	1.11226e-07
64600	1.12577e-07
64700	1.13845e-07
64800	1.14443e-07
64900	1.2928e-07
65000	1.33703e-07
65100	1.27675e-07
65200	1.03722e-07
65300	1.11546e-07
65400	1.40784e-07
65500	1.3865e-07
65600	1.2015e-07
65700	1.06604e-07
65800	1.01812e-07
65900	1.31135e-07
66000	1.33808e-07
66100	1.24715e-07
66200	1.2636e-07
66300	1.38897e-07
66400	1.30493e-07
66500	1.18925e-07
66600	1.17884e-07
66700	8.56477e-08
66800	1.10293e-07
66900	1.20243e-07
67000	1.37515e-07
67100	1.58066e-07
67200	2.43492e-07
67300	2.23143e-07
67400	1.46995e-07
67500	1.33243e-07
67600	1.27461e-07
67700	1.25175e-07
67800	1.80604e-07
67900	1.97891e-07
68000	2.70135e-07
68100	4.43358e-07
68200	6.90359e-07
68300	4.70508e-06
68400	3.95208e-06
68500	2.24101e-06
68600	5.89731e-07
68700	3.47107e-07
68800	1.86411e-07
68900	1.67863e-07
69000	1.42305e-07
69100	1.0421e-07
69200	1.12542e-07
69300	1.16752e-07
69400	1.27011e-07
69500	1.06164e-07
69600	1.0414e-07
69700	1.18906e-07
69800	1.17756e-07
69900	1.10417e-07
70000	1.01789e-07
70100	1.15791e-07
70200	1.10171e-07
70300	1.29958e-07
70400	1.28453e-07
70500	9.90417e-08
70600	1.03822e-07
70700	1.39777e-07
70800	1.37758e-07
70900	1.31301e-07
71000	1.14962e-07
71100	1.16299e-07
71200	1.33682e-07
71300	1.44116e-07
71400	1.28332e-07
71500	1.08851e-07
71600	1.25284e-07
71700	1.40223e-07
71800	1.37339e-07
71900	1.47079e-07
72000	1.43135e-07
72100	1.12612e-07
72200	1.20842e-07
72300	1.11351e-07
72400	1.21698e-07
72500	1.24562e-07
72600	1.25811e-07
72700	1.19641e-07
72800	9.75155e-08
72900	8.73541e-08
73000	1.06967e-07
73100	1.08472e-07
73200	9.88477e-08
73300	1.10044e-07
73400	1.26734e-07
73500	1.33884e-07
73600	1.27523e-07
73700	1.18301e-07
73800	1.33153e-07
73900	3.60181e-07
74000	2.66119e-06
74100	1.68563e-06
74200	1.18649e-07
74300	1.10932e-07
74400	1.08526e-07
74500	1.01614e-07
74600	1.17684e-07
74700	1.293e-07
74800	1.00715e-07
74900	1.1016e-07
75000	1.24241e-07
75100	1.16907e-07
75200	1.04989e-07
75300	1.10061e-07
75400	1.17078e-07
75500	1.10543e-07
75600	1.21845e-07
75700	1.06186e-07
75800	1.20823e-07
75900	9.21275e-08
76000	1.10872e-07
76100	1.47278e-07
76200	1.32043e-07
76300	1.35909e-07
76400	1.17549e-07
76500	1.10354e-07
76600	1.19757e-07
76700	1.1551e-07
76800	1.27284e-07
76900	1.08021e-07
77000	1.15498e-07
77100	1.17966e-07
77200	1.20775e-07
77300	1.33274e-07
77400	1.34836e-07
77500	1.23141e-07
77600	1.13929e-07
77700	1.01908e-07
77800	1.25509e-07
77900	1.40571e-07
78000	1.43493e-07
78100	1.41546e-07
78200	1.31703e-07
78300	1.19777e-07
78400	1.43341e-07
78500	1.31731e-07
78600	1.1013e-07
78700	1.10599e-07
78800	1.01307e-07
78900	9.85686e-08
79000	1.11042e-07
79100	1.16371e-07
79200	1.19655e-07
79300	1.09015e-07
79400	1.26505e-07
79500	1.16578e-07
79600	1.17175e-07
79700	1.10998e-07
79800	9.64093e-08
79900	1.17034e-07
80000	1.31903e-07
80100	1.24471e-07
80200	1.32809e-07
80300	1.28665e-07
80400	1.20342e-07
80500	1.19963e-07
80600	1.05789e-07
80700	8.80143e-08
80800	9.91836e-08
80900	1.28195e-07
81000	1.1983e-07
81100	1.11193e-07
81200	1.04631e-07
81300	1.13099e-07
81400	1.3135e-07
81500	1.34309e-07
81600	1.28766e-07
81700	1.31726e-07
81800	1.02028e-07
81900	9.97327e-08
82000	1.08154e-07
82100	1.2467e-07
82200	1.23465e-07
82300	1.21823e-07
82400	1.2121e-07
82500	1.37139e-07
82600	1.438e-07
82700	1.36997e-07
82800	1.30954e-07
82900	9.34364e-08
83000	1.01474e-07
83100	1.11774e-07
83200	1.13673e-07
83300	1.11428e-07
83400	1.50093e-07
83500	2.01145e-07
83600	2.27032e-07
83700	1.7134e-07
83800	1.31068e-07
83900	1.6507e-07
84000	1.83945e-07
84100	1.51039e-07
84200	1.25132e-07
84300	1.53714e-07
84400	2.13684e-07
84500	2.44538e-07
84600	3.2941e-07
84700	2.76891e-07
84800	1.78185e-07
84900	1.70967e-07
85000	1.70123e-07
85100	1.58673e-07
85200	2.34996e-07
85300	2.46774e-07
85400	1.933e-07
85500	1.23303e-07
85600	1.1499e-07
85700	1.26726e-07
85800	1.16298e-07
85900	1.17474e-07
86000	1.03969e-07
86100	1.11463e-07
86200	1.06883e-07
86300	9.98911e-08
86400	1.28935e-07
86500	1.37635e-07
86600	1.37326e-07
86700	1.2091e-07
86800	1.24821e-07
86900	1.28604e-07
87000	1.32102e-07
87100	1.217e-07
87200	1.16211e-07
87300	1.22653e-07
87400	1.16438e-07
87500	1.20946e-07
87600	1.35031e-07
87700	1.0724e-07
87800	1.23485e-07
87900	1.47569e-07
88000	1.11232e-07
88100	1.20164e-07
88200	1.41792e-07
88300	1.47922e-07
88400	1.24235e-07
88500	1.02975e-07
88600	1.1214e-07
88700	1.10738e-07
88800	1.15241e-07
88900	1.20434e-07
89000	1.37007e-07
89100	1.26667e-07
89200	1.18157e-07
89300	1.08424e-07
89400	1.24142e-07
89500	1.353e-07
89600	1.11343e-07
89700	1.28008e-07
89800	1.35236e-07
89900	1.3885e-07
90000	1.2004e-07
90100	1.10986e-07
90200	1.08931e-07
90300	9.27709e-08
90400	1.02013e-07
90500	1.1089e-07
90600	1.2302e-07
90700	1.10313e-07
90800	1.23556e-07
90900	1.22627e-07
91000	1.17342e-07
91100	1.2789e-07
91200	1.23198e-07
91300	1.15852e-07
91400	1.15179e-07
91500	1.29594e-07
91600	1.29274e-07
91700	1.19537e-07
91800	1.15604e-07
91900	1.22512e-07
92000	1.28578e-07
92100	1.08411e-07
92200	1.04786e-07
92300	1.13511e-07
92400	1.04127e-07
92500	1.20381e-07
92600	1.42655e-07
92700	1.51968e-07
92800	1.39316e-07
92900	1.18853e-07
93000	1.01298e-07
93100	1.06845e-07
93200	1.05464e-07
93300	1.20127e-07
93400	1.19274e-07
93500	1.12699e-07
93600	1.23872e-07
93700	1.29563e-07
93800	1.42175e-07
93900	1.13211e-07
94000	9.6365e-08
94100	1.20158e-07
94200	1.29391e-07
94300	1.20885e-07
94400	1.16009e-07
94500	1.3535e-07
94600	1.1382e-07
94700	1.37094e-07
94800	1.23608e-07
94900	1.26215e-07
95000	1.14972e-07
95100	1.05499e-07
95200	1.15261e-07
95300	1.19968e-07
95400	1.63076e-07
95500	1.43001e-07
95600	1.25775e-07
95700	1.18369e-07
95800	1.25929e-07
95900	1.25985e-07
96000	1.03957e-07
96100	1.10676e-07
96200	1.23498e-07
96300	1.04644e-07
96400	9.81891e-08
96500	1.05836e-07
96600	1.22022e-07
96700	1.21695e-07
96800	1.08698e-07
96900	1.11979e-07
97000	1.31914e-07
97100	1.35417e-07
97200	1.47306e-07
97300	1.25173e-07
97400	1.06281e-07
97500	1.07248e-07
97600	1.10193e-07
97700	1.14832e-07
97800	1.43365e-07
97900	1.11063e-07
98000	1.28096e-07
98100	1.38954e-07
98200	1.18133e-07
98300	1.22403e-07
98400	1.13593e-07
98500	9.88764e-08
98600	9.03431e-08
98700	1.12178e-07
98800	1.22601e-07
98900	1.26217e-07
99000	1.19706e-07
99100	1.44718e-07
99200	1.56595e-07
99300	1.3342e-07
99400	1.08244e-07
99500	1.22216e-07
99600	1.18882e-07
99700	1.20367e-07
99800	1.19597e-07
99900	1.22623e-07
100000	1.23884e-07
100100	1.13941e-07
100200	1.2622e-07
100300	1.28706e-07
100400	1.10319e-07
100500	9.17388e-08
100600	9.8015e-08
100700	9.47826e-08
100800	1.3778e-07
100900	1.31734e-07
101000	1.39777e-07
101100	1.26317e-07
101200	1.09437e-07
101300	1.135e-07
101400	1.08784e-07
101500	1.20125e-07
101600	1.37924e-07
101700	1.24738e-07
101800	1.15886e-07
101900	1.21494e-07
102000	1.22331e-07
102100	1.40552e-07
102200	1.26856e-07
102300	1.20611e-07
102400	1.25192e-07
102500	1.21083e-07
102600	1.44868e-07
102700	1.38919e-07
102800	1.40614e-07
102900	1.15832e-07
103000	1.13335e-07
103100	1.296e-07
103200	1.30102e-07
103300	1.22956e-07
103400	1.03732e-07
103500	1.23287e-07
103600	1.52546e-07
103700	1.21287e-07
103800	1.05399e-07
103900	1.22768e-07
104000	1.21584e-07
104100	1.15886e-07
104200	1.09224e-07
104300	1.06477e-07
104400	1.07104e-07
104500	1.0366e-07
104600	1.11749e-07
104700	1.23423e-07
104800	9.15062e-08
104900	9.85387e-08
105000	1.02981e-07
105100	1.28515e-07
105200	1.38204e-07
105300	1.22651e-07
105400	1.20525e-07
105500	1.18919e-07
105600	1.33721e-07
105700	1.22601e-07
105800	1.11486e-07
105900	1.10395e-07
106000	1.18325e-07
106100	1.12466e-07
106200	1.19175e-07
106300	9.55462e-08
106400	7.73533e-08
106500	9.24417e-08
106600	1.14058e-07
106700	1.39701e-07
106800	1.3775e-07
106900	1.10764e-07
107000	9.22012e-08
107100	9.75055e-08
107200	9.2772e-08
107300	1.02421e-07
107400	1.43016e-07
107500	1.2885e-07
107600	1.20601e-07
107700	9.42415e-08
107800	1.09921e-07
107900	1.28358e-07
108000	1.16521e-07
108100	1.40124e-07
108200	1.5536e-07
108300	1.23803e-07
108400	9.82231e-08
108500	1.08689e-07
108600	1.24473e-07
108700	1.21977e-07
108800	1.08872e-07
108900	1.17071e-07
109000	1.14995e-07
109100	1.22409e-07
109200	1.38543e-07
109300	1.27591e-07
109400	1.19291e-07
109500	1.28952e-07
109600	1.48337e-07
109700	1.01492e-07
109800	1.08829e-07
109900	1.16748e-07
110000	1.0383e-07
110100	1.15989e-07
110200	1.44183e-07
110300	1.34976e-07
110400	1.40507e-07
110500	1.52668e-07
110600	1.18921e-07
110700	1.05194e-07
110800	1.06527e-07
110900	1.3985e-07
111000	9.11818e-07
111100	9.29105e-07
111200	1.65507e-07
111300	1.31861e-07
111400	1.1233e-07
111500	1.07177e-07
111600	1.15624e-07
111700	1.24852e-07
111800	1.24676e-07
111900	1.29216e-07
112000	1.20226e-07
112100	1.40604e-07
112200	1.13111e-07
112300	9.23515e-08
112400	1.19067e-07
112500	1.37789e-07
112600	1.15974e-07
112700	1.14069e-07
112800	1.34926e-07
112900	1.2201e-07
113000	1.10256e-07
113100	1.20637e-07
113200	1.07053e-07
113300	9.49981e-08
113400	9.56418e-08
113500	9.13886e-08
113600	1.12928e-07
113700	1.01974e-07
113800	1.08898e-07
113900	1.20853e-07
114000	8.87615e-08
114100	1.02908e-07
114200	1.3857e-07
114300	1.3661e-07
114400	1.31562e-07
114500	1.29112e-07
114600	1.17148e-07
114700	1.15029e-07
114800	1.06917e-07
114900	1.01979e-07
115000	1.01357e-07
115100	1.17348e-07
115200	1.33925e-07
115300	1.24235e-07
115400	1.05112e-07
115500	1.20479e-07
115600	1.29446e-07
115700	1.27292e-07
115800	1.07347e-07
115900	1.2162e-07
116000	1.18507e-07
116100	9.36473e-08
116200	1.31991e-07
116300	1.31322e-07
116400	1.08058e-07
116500	1.22587e-07
116600	1.16319e-07
116700	1.10159e-07
116800	1.06288e-07
116900	1.24458e-07
117000	1.22741e-07
117100	1.27079e-07
117200	1.33724e-07
117300	1.12131e-07
117400	1.0767e-07
117500	1.16136e-07
117600	1.24726e-07
117700	1.29016e-07
117800	1.27972e-07
117900	1.1903e-07
118000	1.15077e-07
118100	1.47713e-07
118200	1.37719e-07
118300	1.40486e-07
118400	1.2107e-07
118500	1.17043e-07
118600	1.20635e-07
118700	9.76053e-08
118800	9.82606e-08
118900	1.18013e-07
119000	1.37833e-07
119100	1.11696e-07
119200	1.19232e-07
119300	1.38914e-07
119400	1.17549e-07
119500	1.26627e-07
119600	1.31229e-07
119700	1.25471e-07
119800	1.84287e-07
119900	1.73111e-07
120000	1.18863e-07
120100	1.08312e-07
120200	1.16408e-07
120300	1.01372e-07
120400	9.69675e-08
120500	1.02975e-07
120600	1.23934e-07
120700	1.24598e-07
120800	1.23268e-07
120900	1.03445e-07
121000	1.11608e-07
121100	1.3332e-07
121200	1.19628e-07
121300	1.09462e-07
121400	1.04403e-07
121500	1.11253e-07
121600	1.08941e-07
121700	1.06901e-07
121800	9.83804e-08
121900	1.20141e-07
122000	1.27251e-07
122100	1.12463e-07
122200	1.28164e-07
122300	1.18162e-07
122400	1.07087e-07
122500	1.13145e-07
122600	1.06426e-07
122700	1.01466e-07
122800	1.06657e-07
122900	1.20202e-07
123000	1.06497e-07
123100	1.1276e-07
123200	1.33505e-07
123300	1.21137e-07
123400	9.57451e-08
123500	1.2132e-07
123600	1.2732e-07
123700	1.06504e-07
123800	1.16908e-07
123900	1.12099e-07
124000	1.10105e-07
124100	1.24439e-07
124200	1.17592e-07
124300	1.13052e-07
124400	1.10563e-07
124500	1.17376e-07
124600	1.25217e-07
124700	1.11835e-07
124800	1.27731e-07
124900	1.5641e-07
125000	2.83718e-07
125100	4.39666e-07
125200	6.69248e-07
125300	8.7859e-07
125400	7.03691e-07
125500	3.65842e-07
125600	2.26088e-07
125700	4.87956e-07
125800	6.22439e-07
125900	3.76422e-07
126000	4.58294e-07
126100	5.85986e-07
126200	4.70755e-07
126300	7.07066e-07
126400	5.68205e-07
126500	8.26323e-07
126600	9.77676e-07
126700	1.31583e-06
126800	2.35761e-06
126900	2.25339e-06
127000	2.44037e-06
127100	2.54465e-06
127200	1.19167e-06
127300	8.32358e-07
127400	7.93471e-07
127500	7.82637e-07
127600	9.10955e-07
127700	9.10167e-07
127800	8.62847e-07
127900	1.6464e-06
128000	1.65581e-06
128100	9.35679e-07
128200	4.08462e-07
128300	2.13926e-07
128400	1.77046e-07
128500	1.18239e-07
128600	9.57919e-08
128700	9.63525e-08
128800	1.1047e-07
128900	1.24786e-07
129000	9.1395e-08
129100	9.83269e-08
129200	1.36313e-07
129300	1.22795e-07
129400	1.05683e-07
129500	1.10026e-07
129600	1.10226e-07
129700	9.74934e-08
129800	1.07992e-07
129900	1.14527e-07
130000	1.11667e-07
130100	1.0277e-07
130200	9.69225e-08
130300	1.27548e-07
130400	1.25773e-07
130500	1.09921e-07
130600	1.12851e-07
130700	1.0365e-07
130800	1.21645e-07
130900	1.0632e-07
131000	8.52256e-08
131100	8.34938e-08
131200	1.16753e-07
131300	1.13144e-07
131400	9.95251e-08
131500	1.17849e-07
131600	1.13261e-07
131700	1.06261e-07
131800	1.07435e-07
131900	1.04959e-07
132000	1.2454e-07
132100	1.20532e-07
132200	1.05504e-07
132300	1.12598e-07
132400	1.13363e-07
132500	9.75045e-08
132600	9.86374e-08
132700	1.01674e-07
132800	1.11127e-07
132900	1.24095e-07
133000	1.30508e-07
133100	1.19877e-07
133200	1.22869e-07
133300	1.10642e-07
133400	1.16457e-07
133500	9.77269e-08
133600	1.123e-07
133700	1.02075e-07
133800	9.38037e-08
133900	1.11854e-07
134000	1.02532e-07
134100	1.17286e-07
134200	1.39807e-07
134300	9.82452e-08
134400	1.31572e-07
134500	1.34294e-07
134600	9.6927e-08
134700	9.89197e-08
134800	1.1273e-07
134900	1.07471e-07
135000	1.17738e-07
135100	1.14319e-07
135200	1.05276e-07
135300	1.00513e-07
135400	1.07904e-07
135500	1.07807e-07
135600	1.0393e-07
135700	1.21995e-07
135800	1.28215e-07
135900	1.34532e-07
136000	1.2626e-07
136100	1.21329e-07
136200	1.03085e-07
136300	1.04617e-07
136400	1.08704e-07
136500	9.51601e-08
136600	1.17391e-07
136700	1.20027e-07
136800	1.17558e-07
136900	9.99093e-08
137000	1.1428e-07
137100	1.11739e-07
137200	1.34175e-07
137300	1.23565e-07
137400	9.99412e-08
137500	1.0253e-07
137600	9.79581e-08
137700	1.05201e-07
137800	1.25597e-07
137900	1.20049e-07
138000	1.1756e-07
138100	1.2207e-07
138200	1.3672e-07
138300	1.36034e-07
138400	1.32461e-07
138500	1.32761e-07
138600	1.31295e-07
138700	1.11436e-07
138800	1.01738e-07
138900	9.69988e-08
139000	9.97688e-08
139100	1.4013e-07
139200	1.26266e-07
139300	1.35948e-07
139400	1.31913e-07
139500	1.31328e-07
139600	1.17199e-07
139700	9.33406e-08
139800	8.70293e-08
139900	1.0328e-07
140000	1.01353e-07
140100	1.06162e-07
140200	1.08453e-07
140300	1.20562e-07
140400	1.19152e-07
140500	1.19325e-07
140600	9.81056e-08
140700	1.05692e-07
140800	1.14153e-07
140900	9.99229e-08
141000	1.04924e-07
141100	1.15783e-07
141200	1.08629e-07
141300	1.05505e-07
141400	9.98687e-08
141500	1.06249e-07
141600	1.1007e-07
141700	1.14301e-07
141800	1.31386e-07
141900	1.42808e-07
142000	1.2945e-07
142100	1.29873e-07
142200	1.33156e-07
142300	1.05563e-07
142400	1.00709e-07
142500	1.13772e-07
142600	1.09619e-07
142700	1.13779e-07
142800	1.48445e-07
142900	1.42904e-07
143000	1.21331e-07
143100	1.07011e-07
143200	1.03816e-07
143300	1.05665e-07
143400	1.08231e-07
143500	1.13935e-07
143600	1.12515e-07
143700	8.78724e-08
143800	1.09598e-07
143900	1.01502e-07
144000	1.02264e-07
144100	1.32971e-07
144200	1.35151e-07
144300	1.11272e-07
144400	1.22904e-07
144500	1.37767e-07
144600	1.03669e-07
144700	1.11207e-07
144800	1.05398e-07
144900	1.07248e-07
145000	9.31348e-08
145100	8.98204e-08
145200	1.11749e-07
145300	1.37829e-07
145400	1.23877e-07
145500	1.25519e-07
145600	1.17107e-07
145700	9.30013e-08
145800	9.97e-08
145900	9.93718e-08
146000	1.2726e-07
146100	1.28855e-07
146200	1.23352e-07
146300	1.0683e-07
146400	9.98433e-08
146500	1.11796e-07
146600	9.74363e-08
146700	1.1421e-07
146800	1.024e-07
146900	9.35043e-08
147000	1.08432e-07
147100	1.02682e-07
147200	1.08719e-07
147300	1.18908e-07
147400	1.256e-07
147500	1.10247e-07
147600	1.10583e-07
147700	1.21551e-07
147800	1.26888e-07
147900	8.74568e-08
148000	1.40043e-07
148100	1.64028e-07
148200	1.13758e-07
148300	1.25589e-07
148400	1.26094e-07
148500	1.4123e-07
148600	1.37441e-07
148700	1.07325e-07
148800	9.36968e-08
148900	7.58126e-08
149000	9.35782e-08
149100	9.82195e-08
149200	1.04162e-07
149300	1.12375e-07
149400	1.10883e-07
149500	1.11175e-07
149600	1.14522e-07
149700	1.24988e-07
149800	1.35641e-07
149900	1.15477e-07
150000	1.08568e-07
150100	1.18904e-07
150200	1.05893e-07
150300	1.06954e-07
150400	1.12044e-07
150500	1.25402e-07
150600	1.2902e-07
150700	1.16035e-07
150800	1.14549e-07
150900	1.25072e-07
151000	1.23357e-07
151100	9.59892e-08
151200	1.16812e-07
151300	1.09372e-07
151400	1.00226e-07
151500	1.10299e-07
151600	1.2318e-07
151700	1.1372e-07
151800	1.11476e-07
151900	1.02901e-07
152000	1.11166e-07
152100	1.12069e-07
152200	1.10209e-07
152300	1.13199e-07
152400	1.23678e-07
152500	1.15905e-07
152600	1.02966e-07
152700	1.01532e-07
152800	1.04241e-07
152900	1.02044e-07
153000	1.1472e-07
153100	1.26226e-07
153200	1.13168e-07
153300	9.35042e-08
153400	9.20611e-08
153500	1.02083e-07
153600	1.23535e-07
153700	1.17845e-07
153800	1.27613e-07
153900	1.08007e-07
154000	9.60471e-08
154100	1.13122e-07
154200	1.37458e-07
154300	1.26224e-07
154400	9.86651e-08
154500	9.99271e-08
154600	1.08591e-07
154700	1.1116e-07
154800	1.1819e-07
154900	9.30536e-08
155000	1.13989e-07
155100	1.25191e-07
155200	1.0848e-07
155300	1.15068e-07
155400	1.08218e-07
155500	1.12411e-07
155600	1.18335e-07
155700	1.11641e-07
155800	1.06929e-07
155900	1.18878e-07
156000	1.17645e-07
156100	1.23348e-07
156200	1.20313e-07
156300	1.10918e-07
156400	1.16546e-07
156500	1.28017e-07
156600	1.5018e-07
156700	1.22028e-07
156800	1.22557e-07
156900	1.27657e-07
157000	1.2698e-07
157100	1.13283e-07
157200	1.23139e-07
157300	1.29647e-07
157400	1.21002e-07
157500	1.36814e-07
157600	1.06588e-07
157700	9.4204e-08
157800	1.11406e-07
157900	1.23524e-07
158000	1.19701e-07
158100	1.1928e-07
158200	1.25028e-07
158300	1.29595e-07
158400	1.22537e-07
158500	1.09919e-07
158600	1.01483e-07
158700	1.30498e-07
158800	1.30659e-07
158900	1.22963e-07
159000	1.41257e-07
159100	1.22915e-07
159200	1.28162e-07
159300	1.08407e-07
159400	1.06483e-07
159500	1.2475e-07
159600	1.151e-07
159700	1.04522e-07
159800	1.24496e-07
159900	1.14424e-07
160000	1.35767e-07
160100	1.20532e-07
160200	1.21256e-07
160300	9.70938e-08
160400	1.14032e-07
160500	1.18752e-07
160600	1.12669e-07
160700	1.17596e-07
160800	1.05553e-07
160900	1.10531e-07
161000	1.18101e-07
161100	1.25581e-07
161200	1.36782e-07
161300	1.33852e-07
161400	1.08112e-07
161500	1.1691e-07
161600	1.29291e-07
161700	1.17018e-07
161800	1.20394e-07
161900	1.42e-07
162000	1.39714e-07
162100	1.29394e-07
162200	1.24743e-07
162300	1.16113e-07
162400	1.15478e-07
162500	1.13849e-07
162600	1.22639e-07
162700	1.19797e-07
162800	1.0323e-07
162900	1.08707e-07
163000	1.1065e-07
163100	1.13684e-07
163200	1.11337e-07
163300	1.17148e-07
163400	1.32219e-07
163500	1.17224e-07
163600	1.09621e-07
163700	1.07971e-07
163800	1.15261e-07
163900	1.11191e-07
164000	1.0975e-07
164100	9.79898e-08
164200	9.6146e-08
164300	8.5921e-08
164400	1.03643e-07
164500	1.24754e-07
164600	9.87914e-08
164700	1.01704e-07
164800	1.65537e-07
164900	1.35463e-07
165000	1.17621e-07
165100	1.28925e-07
165200	1.25201e-07
165300	1.27686e-07
165400	1.24765e-07
165500	1.07993e-07
165600	1.052e-07
165700	1.08521e-07
165800	1.1137e-07
165900	1.23936e-07
166000	1.19065e-07
166100	1.16498e-07
166200	1.16911e-07
166300	1.13562e-07
166400	1.07682e-07
166500	1.07569e-07
166600	9.89057e-08
166700	1.13471e-07
166800	1.39404e-07
166900	1.42486e-07
167000	1.61916e-07
167100	1.45107e-07
167200	1.2222e-07
167300	1.21776e-07
167400	1.26082e-07
167500	1.42025e-07
167600	1.27914e-07
167700	1.00402e-07
167800	1.29892e-07
167900	1.34544e-07
168000	1.11171e-07
168100	1.28723e-07
168200	1.63625e-07
168300	1.5017e-07
168400	1.28836e-07
168500	1.16052e-07
168600	1.39701e-07
168700	1.31836e-07
168800	1.57251e-07
168900	1.68915e-07
169000	1.71156e-07
169100	2.1535e-07
169200	1.65503e-07
169300	1.59938e-07
169400	2.17404e-07
169500	1.91376e-07
169600	1.67634e-07
169700	1.47342e-07
169800	1.43986e-07
169900	1.7542e-07
170000	1.46602e-07
170100	1.58228e-07
170200	1.4807e-07
170300	1.60153e-07
170400	1.36177e-07
170500	1.42204e-07
170600	1.64142e-07
170700	1.65808e-07
170800	1.54542e-07
170900	1.19274e-07
171000	1.05287e-07
171100	1.15901e-07
171200	1.28842e-07
171300	1.18845e-07
171400	1.33015e-07
171500	1.32897e-07
171600	1.4281e-07
171700	1.27593e-07
171800	1.23952e-07
171900	1.19703e-07
172000	1.13979e-07
172100	1.17239e-07
172200	1.09485e-07
172300	1.11877e-07
172400	9.82376e-08
172500	1.02905e-07
172600	1.30072e-07
172700	1.21932e-07
172800	1.17667e-07
172900	1.18632e-07
173000	1.07854e-07
173100	1.14391e-07
173200	1.2461e-07
173300	1.10819e-07
173400	9.94034e-08
173500	1.21408e-07
173600	1.04565e-07
173700	1.22907e-07
173800	1.24119e-07
173900	1.30204e-07
174000	1.20209e-07
174100	1.15803e-07
174200	9.79309e-08
174300	9.80185e-08
174400	1.03172e-07
174500	1.38375e-07
174600	1.29267e-07
174700	1.22874e-07
174800	9.76966e-08
174900	8.63445e-08
175000	1.18683e-07
175100	1.18471e-07
175200	1.28461e-07
175300	1.21062e-07
175400	1.09204e-07
175500	1.00714e-07
175600	1.01494e-07
175700	1.12589e-07
175800	1.24711e-07
175900	1.05552e-07
176000	9.85501e-08
176100	1.06336e-07
176200	1.02256e-07
176300	1.25683e-07
176400	1.18963e-07
176500	1.11413e-07
176600	1.16418e-07
176700	1.33715e-07
176800	1.27483e-07
176900	1.12573e-07
177000	1.12459e-07
177100	1.23428e-07
177200	1.1206e-07
177300	9.25375e-08
177400	9.51517e-08
177500	1.04761e-07
177600	1.18157e-07
177700	1.12845e-07
177800	1.08945e-07
177900	1.00228e-07
178000	1.28791e-07
178100	1.1438e-07
178200	1.12012e-07
178300	1.09378e-07
178400	1.10955e-07
178500	1.08757e-07
178600	9.30506e-08
178700	9.10658e-08
178800	8.6746e-08
178900	1.16094e-07
179000	1.36639e-07
179100	1.08951e-07
179200	9.20523e-08
179300	8.97122e-08
179400	1.09933e-07
179500	1.32861e-07
179600	1.65071e-07
179700	2.32598e-06
179800	2.92122e-06
179900	2.51317e-07
180000	1.01547e-07
180100	1.08353e-07
180200	1.28054e-07
180300	1.38282e-07
180400	1.28651e-07
180500	1.33573e-07
180600	9.96237e-08
180700	1.00936e-07
180800	9.9109e-08
180900	7.93079e-08
181000	1.06061e-07
181100	8.88524e-08
181200	9.9136e-08
181300	1.17213e-07
181400	1.24617e-07
181500	1.40644e-07
181600	1.14351e-07
181700	9.69306e-08
181800	1.29545e-07
181900	1.27652e-07
182000	1.08467e-07
182100	1.0214e-07
182200	1.22518e-07
182300	1.24541e-07
182400	1.29524e-07
182500	1.23353e-07
182600	1.17313e-07
182700	1.14058e-07
182800	1.09239e-07
182900	9.47029e-08
183000	1.08435e-07
183100	1.00047e-07
183200	1.00031e-07
183300	1.11617e-07
183400	1.0459e-07
183500	1.02936e-07
183600	9.59289e-08
183700	1.10465e-07
183800	1.13686e-07
183900	1.11936e-07
184000	1.0925e-07
184100	1.00914e-07
184200	1.02972e-07
184300	1.03272e-07
184400	1.17183e-07
184500	1.21246e-07
184600	1.15076e-07
184700	1.19358e-07
184800	1.25375e-07
184900	1.14149e-07
185000	1.52303e-07
185100	1.83727e-07
185200	1.196e-07
185300	1.09008e-07
185400	1.11766e-07
185500	1.04346e-07
185600	8.85935e-08
185700	1.11908e-07
185800	1.17067e-07
185900	8.60176e-08
186000	1.19075e-07
186100	1.10925e-07
186200	1.28695e-07
186300	1.16525e-07
186400	1.03385e-07
186500	1.10525e-07
186600	1.23346e-07
186700	1.15995e-07
186800	9.2579e-08
186900	8.76665e-08
187000	1.08984e-07
187100	1.0086e-07
187200	1.09483e-07
187300	9.14515e-08
187400	1.11987e-07
187500	1.2459e-07
187600	1.32117e-07
187700	1.29189e-07
187800	1.10622e-07
187900	1.04981e-07
188000	1.26788e-07
188100	1.15542e-07
188200	9.6025e-08
188300	1.04173e-07
188400	1.47502e-07
188500	1.49251e-07
188600	9.32018e-08
188700	8.19486e-08
188800	1.00227e-07
188900	1.39893e-07
189000	1.36637e-07
189100	1.12918e-07
189200	1.11648e-07
189300	1.20334e-07
189400	1.01715e-07
189500	1.06473e-07
189600	1.23057e-07
189700	1.28278e-07
189800	1.23431e-07
189900	1.25609e-07
190000	1.1885e-07
190100	1.05274e-07
190200	1.16509e-07
190300	8.35916e-08
190400	7.6189e-08
190500	9.66815e-08
190600	1.16655e-07
190700	1.06685e-07
190800	9.65356e-08
190900	1.34034e-07
191000	1.23768e-07
191100	8.99866e-08
191200	1.23596e-07
191300	1.21693e-07
191400	1.03271e-07
191500	1.10658e-07
191600	1.35166e-07
191700	1.20844e-07
191800	1.16662e-07
191900	1.08841e-07
192000	9.98923e-08
192100	1.12257e-07
192200	1.10026e-07
192300	1.06491e-07
192400	1.02668e-07
192500	9.94083e-08
192600	9.76107e-08
192700	1.15122e-07
192800	1.26097e-07
192900	1.27702e-07
193000	1.1447e-07
193100	9.69729e-08
193200	9.76976e-08
193300	1.04168e-07
193400	9.12084e-08
193500	9.47259e-08
193600	1.08433e-07
193700	1.07667e-07
193800	1.08027e-07
193900	1.1455e-07
194000	1.11472e-07
194100	1.31007e-07
194200	1.30515e-07
194300	1.0433e-07
194400	9.2869e-08
194500	1.2826e-07
194600	1.24171e-07
194700	9.95618e-08
194800	1.09414e-07
194900	1.09189e-07
195000	1.04974e-07
195100	1.15339e-07
195200	1.24515e-07
195300	1.05395e-07
195400	1.05556e-07
195500	9.75765e-08
195600	9.57988e-08
195700	1.04317e-07
195800	9.66836e-08
195900	1.06887e-07
196000	1.10597e-07
196100	1.14303e-07
196200	1.11523e-07
196300	1.00292e-07
196400	1.02664e-07
196500	1.22126e-07
196600	1.11663e-07
196700	1.04204e-07
196800	1.18928e-07
196900	1.12179e-07
197000	1.12022e-07
197100	1.17435e-07
197200	1.08815e-07
197300	9.80341e-08
197400	1.10671e-07
197500	1.25003e-07
197600	1.07319e-07
197700	8.98892e-08
197800	9.05075e-08
197900	1.12858e-07
198000	1.09698e-07
198100	1.23243e-07
198200	1.24054e-07
198300	9.95001e-08
198400	9.70223e-08
198500	1.18838e-07
198600	1.37683e-07
198700	1.45603e-07
198800	1.14503e-07
198900	9.3998e-08
199000	1.00548e-07
199100	1.16358e-07
199200	1.2253e-07
199300	1.3651e-07
199400	1.10847e-07
199500	8.97406e-08
199600	8.98048e-08
199700	1.10153e-07
[truncated: 1,002 more rows]

## Sheet: Sheet2
300K_6S
Freq(Hz)	Sv (arb.)
0	4.32845e-07
100	7.80008e-07
200	9.93661e-07
300	2.34727e-07
400	2.10945e-07
500	1.8196e-07
600	1.56148e-07
700	1.62431e-07
800	1.64177e-07
900	1.42552e-07
1000	1.26712e-07
1100	1.2617e-07
1200	1.20567e-07
1300	1.04099e-07
1400	1.3255e-07
1500	1.25659e-07
1600	9.61441e-08
1700	1.16585e-07
1800	1.19874e-07
1900	1.17176e-07
2000	1.25256e-07
2100	1.29807e-07
2200	1.22669e-07
2300	1.22573e-07
2400	1.35776e-07
2500	1.34248e-07
2600	1.16096e-07
2700	1.18847e-07
2800	1.25871e-07
2900	1.19604e-07
3000	1.09777e-07
3100	1.13455e-07
3200	1.24001e-07
3300	1.20178e-07
3400	1.32368e-07
3500	1.25905e-07
3600	1.23846e-07
3700	1.18404e-07
3800	1.21912e-07
3900	1.2865e-07
4000	1.17169e-07
4100	9.73336e-08
4200	1.09776e-07
4300	1.15987e-07
4400	1.30137e-07
4500	1.18349e-07
4600	1.01385e-07
4700	1.2458e-07
4800	1.32688e-07
4900	1.19704e-07
5000	1.24875e-07
5100	1.24152e-07
5200	1.17219e-07
5300	1.35372e-07
5400	1.39267e-07
5500	1.09542e-07
5600	1.19256e-07
5700	1.32421e-07
5800	1.0789e-07
5900	1.00329e-07
6000	1.08541e-07
6100	1.19015e-07
6200	1.2308e-07
6300	1.25503e-07
6400	1.17134e-07
6500	1.20155e-07
6600	1.23833e-07
6700	1.18782e-07
6800	1.15647e-07
6900	1.06854e-07
7000	1.14289e-07
7100	1.29184e-07
7200	1.16201e-07
7300	1.135e-07
7400	1.27719e-07
7500	1.23401e-07
7600	1.2764e-07
7700	1.36304e-07
7800	1.17921e-07
7900	1.27368e-07
8000	1.207e-07
8100	1.1638e-07
8200	1.22621e-07
8300	1.139e-07
8400	1.19355e-07
8500	1.23954e-07
8600	1.17449e-07
8700	1.19851e-07
8800	1.08629e-07
8900	1.07688e-07
9000	1.10289e-07
9100	1.12596e-07
9200	1.04478e-07
9300	1.1067e-07
9400	1.26155e-07
9500	1.172e-07
9600	1.242e-07
9700	1.34543e-07
9800	1.19353e-07
9900	1.15887e-07
10000	1.00297e-07
10100	1.21763e-07
10200	1.42009e-07
10300	1.25341e-07
10400	1.2159e-07
10500	1.31287e-07
10600	1.13677e-07
10700	9.78376e-08
10800	1.22577e-07
10900	1.09349e-07
11000	1.03701e-07
11100	1.09802e-07
11200	1.21444e-07
11300	1.21456e-07
11400	1.06462e-07
11500	9.87081e-08
11600	1.16927e-07
11700	1.26922e-07
11800	1.24277e-07
11900	1.21863e-07
12000	1.26458e-07
12100	1.26397e-07
12200	1.19173e-07
12300	1.14903e-07
12400	1.28304e-07
12500	1.39035e-07
12600	1.24456e-07
12700	1.38451e-07
12800	1.24461e-07
12900	1.13744e-07
13000	1.14485e-07
13100	1.08322e-07
13200	1.09072e-07
13300	1.34758e-07
13400	1.32912e-07
13500	1.34499e-07
13600	1.34026e-07
13700	1.15681e-07
13800	1.15085e-07
13900	1.19167e-07
14000	1.16436e-07
14100	1.24289e-07
14200	1.20385e-07
14300	1.1837e-07
14400	1.15045e-07
14500	9.45051e-08
14600	1.00738e-07
14700	1.12894e-07
14800	1.08297e-07
14900	1.0975e-07
15000	1.1392e-07
15100	1.12683e-07
15200	1.23418e-07
15300	1.15763e-07
15400	1.11785e-07
15500	1.27258e-07
15600	1.1645e-07
15700	1.00937e-07
15800	1.03072e-07
15900	1.11982e-07
16000	1.20862e-07
16100	1.32592e-07
16200	1.1775e-07
16300	8.93457e-08
16400	9.17123e-08
16500	1.09684e-07
16600	1.04208e-07
16700	9.85807e-08
16800	1.09749e-07
16900	1.15229e-07
17000	1.06506e-07
17100	9.2386e-08
17200	1.03058e-07
17300	1.02138e-07
17400	1.11971e-07
17500	1.28101e-07
17600	1.15366e-07
17700	1.02126e-07
17800	9.83905e-08
17900	1.04203e-07
18000	1.35679e-07
18100	1.17616e-07
18200	1.36837e-07
18300	1.23696e-07
18400	1.11106e-07
18500	1.32547e-07
18600	1.28253e-07
18700	1.09994e-07
18800	1.05882e-07
18900	1.04665e-07
19000	1.12267e-07
19100	1.14978e-07
19200	1.04359e-07
19300	1.15443e-07
19400	1.11087e-07
19500	1.09503e-07
19600	1.15367e-07
19700	1.15644e-07
19800	1.11478e-07
19900	1.01661e-07
20000	1.11627e-07
20100	1.16267e-07
20200	1.04182e-07
20300	1.09173e-07
20400	1.04319e-07
20500	1.19995e-07
20600	1.22885e-07
20700	1.08059e-07
20800	1.24211e-07
20900	1.09525e-07
21000	1.02576e-07
21100	1.16948e-07
21200	1.15688e-07
21300	1.20508e-07
21400	1.21971e-07
21500	1.1542e-07
21600	1.18661e-07
21700	1.17805e-07
21800	1.16246e-07
21900	1.17934e-07
22000	1.19178e-07
22100	1.1646e-07
22200	1.19419e-07
22300	1.23595e-07
22400	1.28424e-07
22500	1.26235e-07
22600	1.09845e-07
22700	1.29217e-07
22800	1.38974e-07
22900	1.18538e-07
23000	1.1688e-07
23100	1.26557e-07
23200	1.23383e-07
23300	1.04657e-07
23400	9.83727e-08
23500	1.12511e-07
23600	1.16374e-07
23700	1.20121e-07
23800	1.25736e-07
23900	1.27559e-07
24000	1.36745e-07
24100	1.26913e-07
24200	1.14324e-07
24300	1.18933e-07
24400	1.25415e-07
24500	1.26313e-07
24600	1.27473e-07
24700	1.07018e-07
24800	1.0767e-07
24900	1.06807e-07
25000	1.23009e-07
25100	1.30595e-07
25200	1.01122e-07
25300	1.11532e-07
25400	1.20796e-07
25500	1.09904e-07
25600	1.03464e-07
25700	1.16459e-07
25800	1.10445e-07
25900	1.24051e-07
26000	1.19855e-07
26100	1.18123e-07
26200	1.24888e-07
26300	1.18413e-07
26400	1.13654e-07
26500	1.16053e-07
26600	1.0407e-07
26700	1.11972e-07
26800	1.09709e-07
26900	1.18352e-07
27000	1.23429e-07
27100	1.00007e-07
27200	1.00462e-07
27300	1.15971e-07
27400	1.11802e-07
27500	1.17493e-07
27600	1.16172e-07
27700	1.08224e-07
27800	1.14095e-07
27900	1.28432e-07
28000	1.28517e-07
28100	1.19764e-07
28200	1.16387e-07
28300	1.05617e-07
28400	1.17629e-07
28500	1.2598e-07
28600	1.16318e-07
28700	1.15203e-07
28800	1.15532e-07
28900	1.31413e-07
29000	1.23445e-07
29100	1.16583e-07
29200	1.21017e-07
29300	1.19131e-07
29400	1.22992e-07
29500	1.20567e-07
29600	1.19249e-07
29700	1.26547e-07
29800	1.38008e-07
29900	1.15651e-07
30000	1.22532e-07
30100	1.16792e-07
30200	1.28058e-07
30300	1.18369e-07
30400	1.16304e-07
30500	1.06382e-07
30600	1.17664e-07
30700	1.20696e-07
30800	1.19549e-07
30900	1.11142e-07
31000	1.1068e-07
31100	1.16609e-07
31200	1.01368e-07
31300	1.1312e-07
31400	1.25315e-07
31500	1.10825e-07
31600	1.20133e-07
31700	1.21373e-07
31800	1.16133e-07
31900	1.22654e-07
32000	1.26793e-07
32100	1.25343e-07
32200	1.26285e-07
32300	1.18053e-07
32400	1.19499e-07
32500	1.08562e-07
32600	1.19571e-07
32700	1.10367e-07
32800	1.17402e-07
32900	1.15168e-07
33000	1.18241e-07
33100	1.20012e-07
33200	1.24973e-07
33300	1.08187e-07
33400	1.09042e-07
33500	1.25254e-07
33600	1.24536e-07
33700	1.08986e-07
33800	1.10345e-07
33900	1.14094e-07
34000	1.22317e-07
34100	1.12737e-07
34200	1.10608e-07
34300	1.35336e-07
34400	1.36346e-07
34500	1.29033e-07
34600	1.3294e-07
34700	1.16487e-07
34800	1.14386e-07
34900	1.06216e-07
35000	1.11307e-07
35100	1.40915e-07
35200	1.19883e-07
35300	1.09339e-07
35400	1.01842e-07
35500	1.06713e-07
35600	1.0159e-07
35700	1.05471e-07
35800	9.9701e-08
35900	1.08243e-07
36000	1.16996e-07
36100	1.08401e-07
36200	1.04476e-07
36300	1.07643e-07
36400	1.0899e-07
36500	1.18027e-07
36600	1.26699e-07
36700	1.11846e-07
36800	1.24076e-07
36900	2.28012e-06
37000	1.43119e-05
37100	5.77402e-06
37200	1.32408e-07
37300	1.09012e-07
37400	1.12064e-07
37500	1.33429e-07
37600	1.07036e-07
37700	1.13233e-07
37800	1.2114e-07
37900	1.1815e-07
38000	1.16825e-07
38100	1.21354e-07
38200	1.31755e-07
38300	1.26043e-07
38400	1.13338e-07
38500	1.13941e-07
38600	1.20017e-07
38700	1.25458e-07
38800	1.23662e-07
38900	1.05897e-07
39000	1.20672e-07
39100	1.12747e-07
39200	1.02129e-07
39300	1.33287e-07
39400	1.2099e-07
39500	1.12289e-07
39600	1.23975e-07
39700	1.19523e-07
39800	1.04804e-07
39900	1.12399e-07
40000	1.07227e-07
40100	9.78905e-08
40200	1.09453e-07
40300	1.21606e-07
40400	1.31194e-07
40500	1.3741e-07
40600	1.24455e-07
40700	1.09737e-07
40800	1.17801e-07
40900	1.22406e-07
41000	1.09408e-07
41100	1.06282e-07
41200	1.04415e-07
41300	1.29985e-07
41400	1.55789e-07
41500	3.51285e-07
41600	1.12859e-06
41700	3.13473e-06
41800	6.29484e-06
41900	6.5308e-06
42000	3.50812e-06
42100	7.28187e-06
42200	1.14744e-05
42300	2.64712e-05
42400	1.63953e-05
42500	9.06031e-06
42600	1.33006e-05
42700	7.33626e-06
42800	1.70452e-06
42900	3.43534e-07
43000	1.39142e-07
43100	1.31394e-07
43200	1.25229e-07
43300	1.73575e-07
43400	3.10798e-07
43500	1.4921e-07
43600	1.21301e-07
43700	1.2465e-07
43800	1.31337e-07
43900	1.21233e-07
44000	1.27232e-07
44100	1.34319e-07
44200	1.82698e-07
44300	1.45214e-07
44400	1.08874e-07
44500	1.19424e-07
44600	1.24649e-07
44700	1.1743e-07
44800	1.21943e-07
44900	2.47589e-07
45000	3.07103e-07
45100	1.35644e-07
45200	1.16577e-07
45300	1.33123e-07
45400	1.19069e-07
45500	1.05951e-07
45600	1.17803e-07
45700	1.1915e-07
45800	1.26824e-07
45900	1.2062e-07
46000	1.05639e-07
46100	1.21552e-07
46200	1.15966e-07
46300	1.3307e-07
46400	1.27381e-07
46500	1.34045e-07
46600	1.22869e-07
46700	1.16637e-07
46800	1.19085e-07
46900	1.23794e-07
47000	1.35321e-07
47100	1.1993e-07
47200	1.03265e-07
47300	1.09975e-07
47400	1.01718e-07
47500	1.14058e-07
47600	1.2208e-07
47700	1.18782e-07
47800	1.19004e-07
47900	1.21992e-07
48000	1.13635e-07
48100	1.09158e-07
48200	1.0625e-07
48300	1.14147e-07
48400	1.14975e-07
48500	1.14907e-07
48600	1.25404e-07
48700	1.33336e-07
48800	1.25665e-07
48900	1.06485e-07
49000	1.08265e-07
49100	1.32757e-07
49200	1.21293e-07
49300	1.27267e-07
49400	1.33312e-07
49500	1.27834e-07
49600	1.21813e-07
49700	1.28238e-07
49800	1.2372e-07
49900	1.15897e-07
50000	1.06633e-07
50100	1.07275e-07
50200	1.16038e-07
50300	1.34946e-07
50400	1.366e-07
50500	1.18174e-07
50600	1.03453e-07
50700	1.17956e-07
50800	1.16838e-07
50900	1.36244e-07
51000	1.31946e-07
51100	1.23633e-07
51200	1.24335e-07
51300	1.35453e-07
51400	1.27125e-07
51500	1.22496e-07
51600	1.16196e-07
51700	1.11265e-07
51800	1.32247e-07
51900	1.24754e-07
52000	1.32445e-07
52100	1.25196e-07
52200	1.16295e-07
52300	1.19035e-07
52400	1.0999e-07
52500	1.1593e-07
52600	1.26988e-07
52700	1.20442e-07
52800	1.19177e-07
52900	1.07363e-07
53000	1.23309e-07
53100	1.0897e-07
53200	1.15309e-07
53300	1.20675e-07
53400	1.17842e-07
53500	1.225e-07
53600	1.1743e-07
53700	1.14622e-07
53800	1.17899e-07
53900	1.30835e-07
54000	1.34789e-07
54100	1.27421e-07
54200	1.18341e-07
54300	1.20197e-07
54400	1.18157e-07
54500	1.15668e-07
54600	1.29336e-07
54700	1.17574e-07
54800	1.2374e-07
54900	1.1807e-07
55000	1.14462e-07
55100	1.21036e-07
55200	1.19259e-07
55300	1.17663e-07
55400	1.26629e-07
55500	1.11043e-07
55600	1.04064e-07
55700	1.12904e-07
55800	1.23391e-07
55900	1.24957e-07
56000	1.29854e-07
56100	1.23242e-07
56200	1.16635e-07
56300	1.10234e-07
56400	1.33088e-07
56500	1.4002e-07
56600	1.31597e-07
56700	1.23252e-07
56800	1.38065e-07
56900	1.19434e-07
57000	1.18499e-07
57100	1.19326e-07
57200	1.16956e-07
57300	1.2118e-07
57400	1.24776e-07
57500	1.19729e-07
57600	1.1517e-07
57700	1.18337e-07
57800	1.16076e-07
57900	1.39263e-07
58000	1.32016e-07
58100	1.2477e-07
58200	1.18085e-07
58300	1.1933e-07
58400	1.2827e-07
58500	1.22829e-07
58600	1.1457e-07
58700	1.09087e-07
58800	1.16508e-07
58900	1.34194e-07
59000	1.33875e-07
59100	1.31378e-07
59200	1.23649e-07
59300	1.12922e-07
59400	1.25595e-07
59500	1.11521e-07
59600	1.06618e-07
59700	1.47713e-07
59800	4.62623e-06
59900	3.40529e-05
60000	1.49486e-05
60100	2.04405e-07
60200	1.11851e-07
60300	1.10574e-07
60400	1.1452e-07
60500	1.16075e-07
60600	1.22171e-07
60700	1.2354e-07
60800	1.06791e-07
60900	1.13419e-07
61000	1.19676e-07
61100	1.15427e-07
61200	1.41546e-07
61300	1.22058e-07
61400	1.25504e-07
61500	1.20975e-07
61600	1.13993e-07
61700	1.17813e-07
61800	1.23845e-07
61900	1.18634e-07
62000	1.14054e-07
62100	1.09389e-07
62200	1.19146e-07
62300	1.2782e-07
62400	1.21507e-07
62500	1.2616e-07
62600	1.26103e-07
62700	1.29023e-07
62800	1.23124e-07
62900	1.16804e-07
63000	1.14323e-07
63100	1.2497e-07
63200	1.4125e-07
63300	1.31527e-07
63400	1.16222e-07
63500	1.18711e-07
63600	1.28649e-07
63700	1.3212e-07
63800	1.38635e-07
63900	1.23291e-07
64000	1.0625e-07
64100	1.16327e-07
64200	1.24563e-07
64300	1.20081e-07
64400	1.0389e-07
64500	1.28168e-07
64600	1.32633e-07
64700	1.06028e-07
64800	1.17246e-07
64900	1.17444e-07
65000	1.12319e-07
65100	1.15116e-07
65200	1.19884e-07
65300	1.22458e-07
65400	1.15976e-07
65500	1.17924e-07
65600	1.11944e-07
65700	1.27814e-07
65800	1.17298e-07
65900	1.25719e-07
66000	1.46372e-07
66100	1.36136e-07
66200	1.42458e-07
66300	1.41349e-07
66400	1.17454e-07
66500	1.20167e-07
66600	1.18756e-07
66700	1.15897e-07
66800	1.2164e-07
66900	1.36389e-07
67000	1.54524e-07
67100	1.85222e-07
67200	2.81344e-07
67300	2.38745e-07
67400	1.51403e-07
67500	1.20798e-07
67600	1.21074e-07
67700	1.10547e-07
67800	1.7916e-07
67900	2.52851e-07
68000	3.63231e-07
68100	4.53882e-07
68200	7.30186e-07
68300	4.72822e-06
68400	4.69499e-06
68500	2.24269e-06
68600	6.6148e-07
68700	3.15031e-07
68800	1.64542e-07
68900	1.66251e-07
69000	1.48437e-07
69100	1.42978e-07
69200	1.51194e-07
69300	1.4933e-07
69400	1.54707e-07
69500	1.33322e-07
69600	1.38182e-07
69700	1.38291e-07
69800	1.38025e-07
69900	1.32626e-07
70000	1.28835e-07
70100	1.25411e-07
70200	1.16839e-07
70300	1.25918e-07
70400	1.12587e-07
70500	1.25061e-07
70600	1.26083e-07
70700	1.20524e-07
70800	1.30128e-07
70900	1.16555e-07
71000	1.18647e-07
71100	1.18839e-07
71200	1.15666e-07
71300	1.09749e-07
71400	1.07672e-07
71500	1.10121e-07
71600	1.1381e-07
71700	1.12571e-07
71800	1.14236e-07
71900	1.33577e-07
72000	1.23243e-07
72100	1.18367e-07
72200	1.02768e-07
72300	1.20205e-07
72400	1.1587e-07
72500	1.02439e-07
72600	1.05592e-07
72700	1.22804e-07
72800	1.38289e-07
72900	1.19852e-07
73000	1.18043e-07
73100	1.226e-07
73200	1.29683e-07
73300	1.31004e-07
73400	1.19965e-07
73500	1.05015e-07
73600	1.11435e-07
73700	1.0009e-07
73800	1.23221e-07
73900	3.03923e-07
74000	2.60873e-06
74100	1.68788e-06
74200	1.27881e-07
74300	1.20099e-07
74400	1.23073e-07
74500	1.13821e-07
74600	1.04748e-07
74700	1.13577e-07
74800	1.37851e-07
74900	1.39805e-07
75000	1.29475e-07
75100	1.21954e-07
75200	1.153e-07
75300	1.17443e-07
75400	1.36995e-07
75500	1.15637e-07
75600	1.16483e-07
75700	1.31271e-07
75800	1.20669e-07
75900	1.1248e-07
76000	1.17323e-07
76100	1.20275e-07
76200	1.21244e-07
76300	1.15913e-07
76400	1.11141e-07
76500	1.18561e-07
76600	1.36753e-07
76700	1.31313e-07
76800	1.3576e-07
76900	1.26317e-07
77000	9.71885e-08
77100	9.88854e-08
77200	1.01116e-07
77300	1.15161e-07
77400	1.15722e-07
77500	1.15061e-07
77600	1.17922e-07
77700	1.03241e-07
77800	1.01852e-07
77900	1.12519e-07
78000	1.10821e-07
78100	1.11528e-07
78200	1.08423e-07
78300	1.31436e-07
78400	1.25114e-07
78500	1.15682e-07
78600	1.15461e-07
78700	1.10023e-07
78800	1.19379e-07
78900	1.1633e-07
79000	1.26668e-07
79100	1.19718e-07
79200	1.21216e-07
79300	1.30181e-07
79400	1.32004e-07
79500	1.21733e-07
79600	1.23034e-07
79700	1.23543e-07
79800	1.28379e-07
79900	1.33462e-07
80000	1.30857e-07
80100	1.4322e-07
80200	1.36788e-07
80300	1.32601e-07
80400	1.39087e-07
80500	1.1561e-07
80600	1.19426e-07
80700	1.09085e-07
80800	1.1539e-07
80900	1.23605e-07
81000	1.24604e-07
81100	1.23122e-07
81200	1.25524e-07
81300	1.25842e-07
81400	1.29899e-07
81500	1.20641e-07
81600	1.10729e-07
81700	1.03826e-07
81800	1.11313e-07
81900	1.11823e-07
82000	1.12365e-07
82100	1.13137e-07
82200	1.217e-07
82300	1.22915e-07
82400	1.11389e-07
82500	1.14443e-07
82600	1.27475e-07
82700	1.22354e-07
82800	1.1174e-07
82900	1.19532e-07
83000	1.35985e-07
83100	1.19731e-07
83200	1.08531e-07
83300	1.41982e-07
83400	1.64641e-07
83500	1.76858e-07
83600	1.67961e-07
83700	1.50692e-07
83800	1.27309e-07
83900	1.46473e-07
84000	1.65477e-07
84100	1.38328e-07
84200	1.53293e-07
84300	1.70864e-07
84400	1.8948e-07
84500	2.27105e-07
84600	2.94807e-07
84700	2.40581e-07
84800	2.0274e-07
84900	1.81465e-07
85000	1.73317e-07
85100	1.36991e-07
85200	1.61012e-07
85300	1.94037e-07
85400	1.81891e-07
85500	1.41835e-07
85600	1.37729e-07
85700	1.14472e-07
85800	1.19292e-07
85900	1.34741e-07
86000	1.16383e-07
86100	1.21421e-07
86200	1.26268e-07
86300	1.07816e-07
86400	1.23292e-07
86500	1.1981e-07
86600	1.08554e-07
86700	1.17356e-07
86800	1.2476e-07
86900	1.25247e-07
87000	1.22135e-07
87100	1.17004e-07
87200	1.06929e-07
87300	1.07957e-07
87400	1.08744e-07
87500	1.0502e-07
87600	1.08944e-07
87700	1.19369e-07
87800	1.24931e-07
87900	1.27124e-07
88000	1.19362e-07
88100	1.30447e-07
88200	1.14823e-07
88300	1.00647e-07
88400	1.12207e-07
88500	1.16488e-07
88600	1.10875e-07
88700	1.16385e-07
88800	1.27385e-07
88900	1.28262e-07
89000	1.06973e-07
89100	1.02173e-07
89200	1.14788e-07
89300	1.28516e-07
89400	1.29981e-07
89500	1.21119e-07
89600	1.11803e-07
89700	1.27036e-07
89800	1.17226e-07
89900	1.19031e-07
90000	1.36681e-07
90100	1.35453e-07
90200	1.15527e-07
90300	1.09322e-07
90400	1.21243e-07
90500	1.13514e-07
90600	1.17872e-07
90700	1.20366e-07
90800	1.22009e-07
90900	1.19214e-07
91000	1.23289e-07
91100	1.13279e-07
91200	1.10785e-07
91300	1.16555e-07
91400	1.11344e-07
91500	1.21129e-07
91600	1.15343e-07
91700	1.01062e-07
91800	1.05162e-07
91900	1.21884e-07
92000	1.16429e-07
92100	1.1537e-07
92200	1.26231e-07
92300	1.23329e-07
92400	1.35437e-07
92500	1.25139e-07
92600	1.21462e-07
92700	1.2246e-07
92800	1.09408e-07
92900	1.16175e-07
93000	1.2749e-07
93100	1.30397e-07
93200	1.2043e-07
93300	1.09006e-07
93400	1.20573e-07
93500	1.36977e-07
93600	1.25917e-07
93700	1.34159e-07
93800	1.34575e-07
93900	1.13371e-07
94000	1.20196e-07
94100	1.09872e-07
94200	1.15058e-07
94300	1.13032e-07
94400	1.02936e-07
94500	1.2532e-07
94600	1.42581e-07
94700	1.33513e-07
94800	1.1192e-07
94900	1.18729e-07
95000	1.30606e-07
95100	1.0899e-07
95200	1.12657e-07
95300	1.2272e-07
95400	1.24088e-07
95500	1.29763e-07
95600	1.23629e-07
95700	1.19105e-07
95800	1.21165e-07
95900	1.20705e-07
96000	1.17878e-07
96100	1.20749e-07
96200	1.13681e-07
96300	1.21227e-07
96400	1.27126e-07
96500	1.23666e-07
96600	1.14986e-07
96700	1.16547e-07
96800	1.16039e-07
96900	1.19455e-07
97000	1.27666e-07
97100	1.15831e-07
97200	1.20166e-07
97300	1.27158e-07
97400	1.26964e-07
97500	1.20247e-07
97600	1.22432e-07
97700	1.32578e-07
97800	1.18103e-07
97900	1.07652e-07
98000	1.09965e-07
98100	1.29684e-07
98200	1.29132e-07
98300	1.21425e-07
98400	1.06413e-07
98500	1.10262e-07
98600	1.20539e-07
98700	1.2171e-07
98800	1.25977e-07
98900	1.29019e-07
99000	1.23383e-07
99100	9.81367e-08
99200	9.60445e-08
99300	1.05407e-07
99400	1.16025e-07
99500	1.15053e-07
99600	9.88282e-08
99700	1.21465e-07
99800	1.35104e-07
99900	1.29689e-07
100000	1.34066e-07
100100	1.26158e-07
100200	1.30234e-07
100300	1.13037e-07
100400	1.16014e-07
100500	1.0642e-07
100600	1.21188e-07
100700	1.33883e-07
100800	1.13902e-07
100900	1.12145e-07
101000	1.17272e-07
101100	1.1373e-07
101200	1.35472e-07
101300	1.3047e-07
101400	1.24225e-07
101500	1.20594e-07
101600	1.05728e-07
101700	1.09952e-07
101800	1.29364e-07
101900	1.29865e-07
102000	1.17426e-07
102100	1.12854e-07
102200	1.1526e-07
102300	1.17582e-07
102400	1.19925e-07
102500	1.15968e-07
102600	1.32434e-07
102700	1.25866e-07
102800	1.23128e-07
102900	1.15766e-07
103000	1.11807e-07
103100	1.29387e-07
103200	1.23962e-07
103300	1.20993e-07
103400	1.1579e-07
103500	1.21079e-07
103600	1.08353e-07
103700	1.08792e-07
103800	1.12922e-07
103900	1.30108e-07
104000	1.2972e-07
104100	1.19488e-07
104200	1.18288e-07
104300	1.1092e-07
104400	1.22417e-07
104500	1.06397e-07
104600	1.09815e-07
104700	1.14159e-07
104800	1.16538e-07
104900	1.27184e-07
105000	1.31169e-07
105100	1.19692e-07
105200	1.08147e-07
105300	1.36362e-07
105400	1.48351e-07
105500	1.29409e-07
105600	1.05657e-07
105700	1.16349e-07
105800	1.29039e-07
105900	1.21428e-07
106000	1.10195e-07
106100	1.05953e-07
106200	1.13826e-07
106300	1.24513e-07
106400	1.24549e-07
106500	1.26829e-07
106600	1.21027e-07
106700	1.18671e-07
106800	9.88074e-08
106900	1.12648e-07
107000	1.14533e-07
107100	1.25695e-07
107200	1.26855e-07
107300	1.25247e-07
107400	1.30788e-07
107500	1.27182e-07
107600	1.17469e-07
107700	1.16415e-07
107800	1.16111e-07
107900	1.08672e-07
108000	1.31673e-07
108100	1.196e-07
108200	1.16297e-07
108300	1.38609e-07
108400	1.24901e-07
108500	1.03359e-07
108600	1.04399e-07
108700	9.84305e-08
108800	1.12483e-07
108900	1.03488e-07
109000	1.14768e-07
109100	1.27862e-07
109200	1.29194e-07
109300	1.23278e-07
109400	1.26868e-07
109500	1.12006e-07
109600	1.10862e-07
109700	1.23057e-07
109800	1.13741e-07
109900	1.07568e-07
110000	1.22507e-07
110100	1.34762e-07
110200	1.20186e-07
110300	1.02066e-07
110400	1.04429e-07
110500	1.23979e-07
110600	1.18591e-07
110700	1.07331e-07
110800	1.0182e-07
110900	1.49941e-07
111000	9.84183e-07
111100	9.9472e-07
111200	1.54675e-07
111300	1.3488e-07
111400	1.35599e-07
111500	1.2644e-07
111600	1.1198e-07
111700	1.13819e-07
111800	1.20042e-07
111900	1.04704e-07
112000	1.01651e-07
112100	1.20305e-07
112200	1.22804e-07
112300	1.13716e-07
112400	1.1629e-07
112500	1.20717e-07
112600	1.1226e-07
112700	9.42508e-08
112800	9.94639e-08
112900	1.1585e-07
113000	1.06316e-07
113100	1.14237e-07
113200	1.20491e-07
113300	1.17329e-07
113400	1.13601e-07
113500	1.23749e-07
113600	1.29554e-07
113700	1.15792e-07
113800	1.21963e-07
113900	1.17795e-07
114000	1.10394e-07
114100	1.05194e-07
114200	1.17014e-07
114300	1.13353e-07
114400	1.19355e-07
114500	1.20935e-07
114600	1.10103e-07
114700	1.20905e-07
114800	1.22472e-07
114900	1.22207e-07
115000	1.27145e-07
115100	1.0987e-07
115200	1.1889e-07
115300	1.17721e-07
115400	1.23098e-07
115500	1.18329e-07
115600	1.16522e-07
115700	1.23579e-07
115800	1.39898e-07
115900	1.38074e-07
116000	1.08541e-07
116100	9.92223e-08
116200	1.17635e-07
116300	1.19341e-07
116400	1.131e-07
116500	1.1977e-07
116600	1.23211e-07
116700	1.20812e-07
116800	1.29841e-07
116900	1.23831e-07
117000	1.23518e-07
117100	1.13149e-07
117200	9.90721e-08
117300	1.23693e-07
117400	1.16988e-07
117500	1.08854e-07
117600	1.16165e-07
117700	1.25606e-07
117800	1.33942e-07
117900	1.2715e-07
118000	1.21818e-07
118100	1.25124e-07
118200	1.18133e-07
118300	1.31796e-07
118400	1.13453e-07
118500	1.1793e-07
118600	1.43207e-07
118700	1.39675e-07
118800	1.23266e-07
118900	1.45003e-07
119000	1.34084e-07
119100	9.92858e-08
119200	1.2235e-07
119300	1.33084e-07
119400	1.17067e-07
119500	1.22632e-07
119600	1.03805e-07
119700	1.13759e-07
119800	2.06644e-07
119900	1.79136e-07
120000	1.29286e-07
120100	1.22978e-07
120200	1.20297e-07
120300	1.17011e-07
120400	1.17531e-07
120500	1.15468e-07
120600	1.0109e-07
120700	1.08349e-07
120800	1.16379e-07
120900	1.038e-07
121000	9.78832e-08
121100	9.489e-08
121200	1.13441e-07
121300	1.06529e-07
121400	1.11284e-07
121500	1.05641e-07
121600	1.11165e-07
121700	1.18061e-07
121800	1.27577e-07
121900	1.11855e-07
122000	1.16723e-07
122100	1.31727e-07
122200	1.42255e-07
122300	1.26877e-07
122400	1.21943e-07
122500	1.1349e-07
122600	1.04689e-07
122700	1.31317e-07
122800	1.26561e-07
122900	1.25459e-07
123000	1.22586e-07
123100	1.15895e-07
123200	1.09271e-07
123300	1.0685e-07
123400	1.30002e-07
123500	1.25082e-07
123600	1.32504e-07
123700	1.30057e-07
123800	1.06181e-07
123900	1.04013e-07
124000	1.10417e-07
124100	1.11167e-07
124200	1.12379e-07
124300	1.11104e-07
124400	1.273e-07
124500	1.3213e-07
124600	1.19398e-07
124700	1.11019e-07
124800	1.40363e-07
124900	1.70373e-07
125000	2.75525e-07
125100	4.68905e-07
125200	6.74139e-07
125300	8.21644e-07
125400	7.08941e-07
125500	3.72672e-07
125600	2.15292e-07
125700	4.74471e-07
125800	5.94012e-07
125900	3.70062e-07
126000	5.11994e-07
126100	6.01487e-07
126200	3.95713e-07
126300	6.12559e-07
126400	5.23116e-07
126500	7.59541e-07
126600	9.03775e-07
126700	1.4455e-06
126800	2.33532e-06
126900	2.24566e-06
127000	2.5551e-06
127100	2.55953e-06
127200	1.2076e-06
127300	8.46788e-07
127400	8.3421e-07
127500	8.43706e-07
127600	8.35103e-07
127700	8.6183e-07
127800	7.8764e-07
127900	1.49814e-06
128000	1.55861e-06
128100	9.36141e-07
128200	4.07672e-07
128300	1.98462e-07
128400	1.41785e-07
128500	1.36114e-07
128600	1.24969e-07
128700	1.19121e-07
128800	1.11491e-07
128900	1.10497e-07
129000	1.09586e-07
129100	1.16775e-07
129200	1.32535e-07
129300	1.24905e-07
129400	1.32243e-07
129500	1.3578e-07
129600	1.23468e-07
129700	1.09215e-07
129800	1.14549e-07
129900	1.192e-07
130000	1.23695e-07
130100	1.30874e-07
130200	1.15747e-07
130300	1.10003e-07
130400	1.16837e-07
130500	1.27977e-07
130600	1.15423e-07
130700	1.15187e-07
130800	1.13254e-07
130900	1.16572e-07
131000	1.24295e-07
131100	1.14247e-07
131200	1.17122e-07
131300	1.30683e-07
131400	1.28559e-07
131500	1.14353e-07
131600	1.15883e-07
131700	1.15029e-07
131800	1.14554e-07
131900	1.11827e-07
132000	1.10526e-07
132100	1.18897e-07
132200	1.24384e-07
132300	1.10094e-07
132400	1.1614e-07
132500	1.2088e-07
132600	1.20912e-07
132700	1.2111e-07
132800	1.26959e-07
132900	1.15224e-07
133000	1.13544e-07
133100	1.07705e-07
133200	1.06763e-07
133300	1.29234e-07
133400	1.26166e-07
133500	1.19991e-07
133600	1.24708e-07
133700	1.21183e-07
133800	1.0976e-07
133900	1.24853e-07
134000	1.10698e-07
134100	1.14723e-07
134200	1.31011e-07
134300	1.31162e-07
134400	1.29751e-07
134500	1.26108e-07
134600	1.30276e-07
134700	1.18767e-07
134800	1.06664e-07
134900	1.20673e-07
135000	1.3828e-07
135100	1.33361e-07
135200	1.25091e-07
135300	1.08288e-07
135400	1.04108e-07
135500	1.11544e-07
135600	1.17462e-07
135700	1.2103e-07
135800	1.18075e-07
135900	1.19667e-07
136000	1.19206e-07
136100	1.25881e-07
136200	1.25239e-07
136300	1.23133e-07
136400	1.1432e-07
136500	1.17748e-07
136600	1.07886e-07
136700	1.09313e-07
136800	9.70507e-08
136900	9.91642e-08
137000	1.20211e-07
137100	1.3683e-07
137200	1.16214e-07
137300	1.02789e-07
137400	1.04975e-07
137500	1.03747e-07
137600	1.07743e-07
137700	1.09531e-07
137800	1.24462e-07
137900	1.2742e-07
138000	1.1252e-07
138100	9.93236e-08
138200	1.02079e-07
138300	1.21003e-07
138400	1.08722e-07
138500	9.12572e-08
138600	9.77239e-08
138700	1.12813e-07
138800	1.06086e-07
138900	9.36743e-08
139000	1.07484e-07
139100	1.25468e-07
139200	1.20599e-07
139300	1.24795e-07
139400	1.1607e-07
139500	1.18562e-07
139600	1.33973e-07
139700	1.1625e-07
139800	1.04201e-07
139900	1.14157e-07
140000	9.62945e-08
140100	1.04139e-07
140200	1.19704e-07
140300	1.13039e-07
140400	1.29839e-07
140500	1.19397e-07
140600	1.14791e-07
140700	1.10832e-07
140800	1.10728e-07
140900	1.16166e-07
141000	1.02698e-07
141100	1.05885e-07
141200	1.21583e-07
141300	1.20672e-07
141400	1.04789e-07
141500	9.39012e-08
141600	1.13155e-07
141700	1.14447e-07
141800	1.1528e-07
141900	1.2631e-07
142000	1.13263e-07
142100	1.17067e-07
142200	1.2002e-07
142300	1.13748e-07
142400	1.04565e-07
142500	1.06035e-07
142600	1.23824e-07
142700	1.3276e-07
142800	1.09014e-07
142900	1.22446e-07
143000	1.14619e-07
143100	1.14426e-07
143200	1.16052e-07
143300	1.05767e-07
143400	1.22093e-07
143500	1.052e-07
143600	1.09521e-07
143700	1.0785e-07
143800	1.12939e-07
143900	1.24613e-07
144000	1.05084e-07
144100	1.24728e-07
144200	1.25839e-07
144300	1.21032e-07
144400	1.10324e-07
144500	9.06366e-08
144600	8.64362e-08
144700	1.09851e-07
144800	1.13542e-07
144900	1.10577e-07
145000	1.04113e-07
145100	1.05392e-07
145200	1.14985e-07
145300	1.16652e-07
145400	1.12563e-07
145500	9.98894e-08
145600	9.48458e-08
145700	1.00094e-07
145800	1.15404e-07
145900	1.16691e-07
146000	1.09489e-07
146100	1.0407e-07
146200	1.01444e-07
146300	1.14085e-07
146400	1.24077e-07
146500	1.04501e-07
146600	1.17859e-07
146700	1.14469e-07
146800	1.28366e-07
146900	1.32289e-07
147000	1.13523e-07
147100	1.15865e-07
147200	1.22013e-07
147300	1.21049e-07
147400	1.14029e-07
147500	1.14718e-07
147600	1.24011e-07
147700	1.08946e-07
147800	1.06035e-07
147900	1.13621e-07
148000	1.97896e-07
148100	2.25275e-07
148200	1.2747e-07
148300	1.11576e-07
148400	1.16026e-07
148500	1.33243e-07
148600	1.07995e-07
148700	1.16077e-07
148800	1.32544e-07
148900	1.22094e-07
149000	1.09727e-07
149100	9.93951e-08
149200	1.11229e-07
149300	1.2383e-07
149400	1.21805e-07
149500	1.08663e-07
149600	1.20808e-07
149700	1.15278e-07
149800	1.33877e-07
149900	1.39443e-07
150000	1.19364e-07
150100	1.05123e-07
150200	9.65631e-08
150300	1.08584e-07
150400	1.31247e-07
150500	1.33586e-07
150600	1.22914e-07
150700	1.10234e-07
150800	1.02687e-07
150900	1.10026e-07
151000	1.05027e-07
151100	1.04046e-07
151200	1.11288e-07
151300	1.23101e-07
151400	1.1304e-07
151500	1.08074e-07
151600	1.2165e-07
151700	1.16635e-07
151800	1.19214e-07
151900	1.16869e-07
152000	1.21802e-07
152100	1.10621e-07
152200	1.18056e-07
152300	1.07941e-07
152400	1.06138e-07
152500	1.07815e-07
152600	1.12097e-07
152700	1.23222e-07
152800	1.17982e-07
152900	1.30413e-07
153000	1.2549e-07
153100	1.20209e-07
153200	1.14401e-07
153300	1.10314e-07
153400	1.15566e-07
153500	1.27929e-07
153600	1.20932e-07
153700	1.16356e-07
153800	1.13805e-07
153900	1.126e-07
154000	1.15182e-07
154100	1.23265e-07
154200	1.02933e-07
154300	1.05577e-07
154400	1.20194e-07
154500	1.19542e-07
154600	1.05116e-07
154700	9.9731e-08
154800	1.05899e-07
154900	1.01735e-07
155000	1.05632e-07
155100	1.18869e-07
155200	1.22609e-07
155300	1.1503e-07
155400	1.16476e-07
155500	1.15732e-07
155600	1.16107e-07
155700	1.08296e-07
155800	8.95846e-08
155900	1.06666e-07
156000	1.26113e-07
156100	1.16169e-07
156200	9.16743e-08
156300	1.00956e-07
156400	1.09705e-07
156500	1.15097e-07
156600	1.2578e-07
156700	1.13061e-07
156800	1.07618e-07
156900	9.46396e-08
157000	9.6979e-08
157100	1.03724e-07
157200	1.02222e-07
157300	1.17335e-07
157400	1.21867e-07
157500	1.26396e-07
157600	1.25935e-07
157700	1.21519e-07
157800	1.28572e-07
157900	1.37036e-07
158000	1.1464e-07
158100	1.13768e-07
158200	1.31318e-07
158300	1.16225e-07
158400	1.08444e-07
158500	1.15018e-07
158600	1.061e-07
158700	1.19839e-07
158800	1.12481e-07
158900	1.15667e-07
159000	1.06218e-07
159100	1.05337e-07
159200	9.28921e-08
159300	1.03141e-07
159400	1.25638e-07
159500	1.11759e-07
159600	1.10212e-07
159700	1.08197e-07
159800	1.08729e-07
159900	1.1153e-07
160000	1.14732e-07
160100	1.17528e-07
160200	1.18646e-07
160300	1.20037e-07
160400	1.19504e-07
160500	1.20576e-07
160600	1.18148e-07
160700	1.05289e-07
160800	1.07149e-07
160900	1.0347e-07
161000	1.23972e-07
161100	1.2363e-07
161200	1.12545e-07
161300	1.0601e-07
161400	1.05062e-07
161500	1.10697e-07
161600	1.14788e-07
161700	1.10187e-07
161800	1.17338e-07
161900	1.12256e-07
162000	1.13829e-07
162100	1.11052e-07
162200	1.11718e-07
162300	1.1087e-07
162400	1.08374e-07
162500	1.10578e-07
162600	1.1169e-07
162700	1.06269e-07
162800	1.14199e-07
162900	1.14544e-07
163000	1.13902e-07
163100	1.09866e-07
163200	1.15636e-07
163300	1.26373e-07
163400	1.24052e-07
163500	1.04311e-07
163600	1.08589e-07
163700	1.07814e-07
163800	1.15773e-07
163900	1.21022e-07
164000	1.24935e-07
164100	1.16542e-07
164200	1.09797e-07
164300	1.03076e-07
164400	1.17125e-07
164500	1.22387e-07
164600	1.08782e-07
164700	1.03251e-07
164800	1.15986e-07
164900	1.26543e-07
165000	1.39169e-07
165100	1.26254e-07
165200	1.07684e-07
165300	1.17049e-07
165400	1.12643e-07
165500	1.30585e-07
165600	1.11554e-07
165700	9.60294e-08
165800	1.15314e-07
165900	1.16535e-07
166000	1.06973e-07
166100	1.0702e-07
166200	9.87165e-08
166300	1.10112e-07
166400	1.2187e-07
166500	1.0335e-07
166600	1.02511e-07
166700	1.32618e-07
166800	1.60718e-07
166900	1.49974e-07
167000	1.55358e-07
167100	1.55282e-07
167200	1.48005e-07
167300	1.12694e-07
167400	1.24215e-07
167500	1.39504e-07
167600	1.25016e-07
167700	1.18312e-07
167800	1.38385e-07
167900	1.30717e-07
168000	1.30972e-07
168100	1.27996e-07
168200	1.32524e-07
168300	1.2143e-07
168400	1.31559e-07
168500	1.43564e-07
168600	1.49448e-07
168700	1.57205e-07
168800	1.62914e-07
168900	1.62465e-07
169000	1.47984e-07
169100	1.82478e-07
169200	1.79811e-07
169300	1.93217e-07
169400	2.48179e-07
169500	1.92792e-07
169600	1.59904e-07
169700	1.23103e-07
169800	1.20048e-07
169900	1.43719e-07
170000	1.53698e-07
170100	1.59985e-07
170200	1.49201e-07
170300	1.48722e-07
170400	1.28359e-07
170500	1.18507e-07
170600	1.58341e-07
170700	1.6251e-07
170800	1.21279e-07
170900	1.05636e-07
171000	1.27037e-07
171100	1.24837e-07
171200	1.15189e-07
171300	1.03473e-07
171400	1.1888e-07
171500	1.27126e-07
171600	1.17728e-07
171700	1.05694e-07
171800	1.11428e-07
171900	1.15279e-07
172000	1.0474e-07
172100	1.02288e-07
172200	1.09383e-07
172300	1.00994e-07
172400	1.15563e-07
172500	1.12322e-07
172600	1.08803e-07
172700	1.24009e-07
172800	1.22012e-07
172900	1.10064e-07
173000	1.09073e-07
173100	1.05561e-07
173200	1.01987e-07
173300	1.08762e-07
173400	1.1656e-07
173500	1.27279e-07
173600	1.1098e-07
173700	1.16521e-07
173800	1.2057e-07
173900	1.14606e-07
174000	1.24886e-07
174100	1.33095e-07
174200	1.2972e-07
174300	1.168e-07
174400	1.09288e-07
174500	1.02719e-07
174600	1.10314e-07
174700	1.07052e-07
174800	1.15777e-07
174900	1.25652e-07
175000	1.09251e-07
175100	1.02434e-07
175200	1.01806e-07
175300	1.10815e-07
175400	9.52853e-08
175500	9.72274e-08
175600	9.81834e-08
175700	1.01913e-07
175800	1.04834e-07
175900	1.14061e-07
176000	1.20005e-07
176100	1.07018e-07
176200	1.00872e-07
176300	9.56687e-08
176400	1.0102e-07
176500	9.9481e-08
176600	1.15716e-07
176700	1.20173e-07
176800	1.14383e-07
176900	1.10391e-07
177000	1.11333e-07
177100	1.22424e-07
177200	1.29751e-07
177300	1.11981e-07
177400	1.12808e-07
177500	1.13394e-07
177600	1.09617e-07
177700	1.04841e-07
177800	1.22839e-07
177900	1.20016e-07
178000	1.16176e-07
178100	1.24439e-07
178200	1.22461e-07
178300	9.90148e-08
178400	1.0603e-07
178500	1.10046e-07
178600	1.12096e-07
178700	1.02986e-07
178800	1.19651e-07
178900	1.22411e-07
179000	1.17106e-07
179100	1.07512e-07
179200	1.13063e-07
179300	1.11976e-07
179400	1.11598e-07
179500	1.01645e-07
179600	1.5541e-07
179700	2.34181e-06
179800	2.92184e-06
179900	2.74436e-07
180000	9.76436e-08
180100	1.08617e-07
180200	1.12919e-07
180300	1.05526e-07
180400	1.02053e-07
180500	9.9877e-08
180600	1.05627e-07
180700	1.01061e-07
180800	1.07984e-07
180900	1.12466e-07
181000	1.12485e-07
181100	1.09791e-07
181200	9.52738e-08
181300	1.11576e-07
181400	1.27317e-07
181500	1.2475e-07
181600	1.21557e-07
181700	1.19638e-07
181800	1.2405e-07
181900	1.14893e-07
182000	1.33308e-07
182100	1.25979e-07
182200	1.31779e-07
182300	1.19972e-07
182400	1.18433e-07
182500	1.18175e-07
182600	1.05251e-07
182700	1.10557e-07
182800	1.08258e-07
182900	1.1242e-07
183000	1.24502e-07
183100	9.79963e-08
183200	1.13202e-07
183300	1.19359e-07
183400	1.19973e-07
183500	1.19304e-07
183600	1.23171e-07
183700	1.22122e-07
183800	1.18475e-07
183900	1.2217e-07
184000	1.13312e-07
184100	1.16438e-07
184200	1.22257e-07
184300	1.0427e-07
184400	1.09538e-07
184500	1.03189e-07
184600	1.00374e-07
184700	1.07827e-07
184800	1.16294e-07
184900	1.07751e-07
185000	1.43643e-07
185100	1.76274e-07
185200	1.01772e-07
185300	1.00629e-07
185400	1.09963e-07
185500	1.15123e-07
185600	1.00372e-07
185700	1.10329e-07
185800	1.15544e-07
185900	1.27367e-07
186000	1.22768e-07
186100	1.09849e-07
186200	1.173e-07
186300	1.04522e-07
186400	1.03906e-07
186500	1.18492e-07
186600	1.07361e-07
186700	9.24277e-08
186800	9.83627e-08
186900	1.07926e-07
187000	1.18105e-07
187100	1.11821e-07
187200	1.10807e-07
187300	1.2219e-07
187400	1.20837e-07
187500	1.26849e-07
187600	1.13804e-07
187700	1.15764e-07
187800	1.23894e-07
187900	1.22549e-07
188000	1.11343e-07
188100	1.23038e-07
188200	1.04717e-07
188300	1.08054e-07
188400	1.0552e-07
188500	9.57164e-08
188600	1.02846e-07
188700	9.80031e-08
188800	1.14702e-07
188900	1.22583e-07
189000	1.30721e-07
189100	1.19808e-07
189200	1.15378e-07
189300	1.14578e-07
189400	1.14639e-07
189500	1.02196e-07
189600	1.04242e-07
189700	1.17868e-07
189800	1.09546e-07
189900	1.05008e-07
190000	9.73487e-08
190100	1.01972e-07
190200	1.05829e-07
190300	1.1614e-07
190400	1.20598e-07
190500	1.1906e-07
190600	1.04084e-07
190700	8.89279e-08
190800	9.74794e-08
190900	1.10861e-07
191000	1.12509e-07
191100	1.12946e-07
191200	1.03158e-07
191300	1.00979e-07
191400	1.08143e-07
191500	1.05787e-07
191600	1.12656e-07
191700	1.16425e-07
191800	1.14088e-07
191900	1.18279e-07
192000	1.22594e-07
192100	1.14687e-07
192200	1.27736e-07
192300	1.1116e-07
192400	1.10787e-07
192500	1.20494e-07
192600	1.17106e-07
192700	1.17193e-07
192800	1.08741e-07
192900	1.06765e-07
193000	1.30938e-07
193100	1.29357e-07
193200	1.08638e-07
193300	1.09826e-07
193400	1.09371e-07
193500	1.12549e-07
193600	1.05701e-07
193700	1.06778e-07
193800	1.15414e-07
193900	1.13364e-07
194000	1.09537e-07
194100	1.16726e-07
194200	1.26923e-07
194300	1.2823e-07
194400	1.14554e-07
194500	1.11392e-07
194600	9.41604e-08
194700	1.03611e-07
194800	9.03274e-08
194900	1.06864e-07
195000	1.21438e-07
195100	1.2254e-07
195200	1.14334e-07
195300	1.11026e-07
195400	1.12243e-07
195500	1.13841e-07
195600	1.19323e-07
195700	1.06997e-07
195800	9.59344e-08
195900	1.13865e-07
196000	1.21042e-07
196100	1.03223e-07
196200	1.02331e-07
196300	1.0263e-07
196400	1.0407e-07
196500	1.31151e-07
196600	1.32323e-07
196700	1.11143e-07
196800	1.00569e-07
196900	1.16934e-07
197000	1.27689e-07
197100	1.11114e-07
197200	1.02768e-07
197300	8.97265e-08
197400	1.01246e-07
197500	1.08453e-07
197600	1.04463e-07
197700	9.81373e-08
197800	1.16392e-07
197900	1.39723e-07
198000	1.29904e-07
198100	1.05626e-07
198200	1.03725e-07
198300	9.80787e-08
198400	8.89714e-08
198500	9.83973e-08
198600	1.21229e-07
198700	1.21227e-07
198800	1.05482e-07
198900	9.97543e-08
199000	1.04855e-07
199100	1.21483e-07
199200	1.07975e-07
199300	1.20453e-07
199400	1.0532e-07
199500	1.10756e-07
199600	1.03347e-07
199700	9.40346e-08
[truncated: 1,003 more rows]

## Sheet: Sheet3
300K_12S
Freq(Hz)	Sv (arb.)
0	1.52532e-06
100	1.25544e-06
200	7.98397e-07
300	2.55329e-07
400	2.36316e-07
500	2.15175e-07
600	1.78897e-07
700	1.64255e-07
800	1.53359e-07
900	1.41385e-07
1000	1.32141e-07
1100	1.2797e-07
1200	1.25002e-07
1300	1.12725e-07
1400	1.30409e-07
1500	1.29282e-07
1600	1.20784e-07
1700	1.27873e-07
1800	1.36835e-07
1900	1.2941e-07
2000	1.30905e-07
2100	1.43118e-07
2200	1.19153e-07
2300	1.16705e-07
2400	1.19265e-07
2500	1.15939e-07
2600	1.24745e-07
2700	1.28509e-07
2800	1.30613e-07
2900	1.30192e-07
3000	1.09846e-07
3100	1.06548e-07
3200	1.10068e-07
3300	1.06953e-07
3400	1.22629e-07
3500	1.30069e-07
3600	1.31133e-07
3700	1.226e-07
3800	1.25401e-07
3900	1.26939e-07
4000	1.16552e-07
4100	1.18218e-07
4200	1.13582e-07
4300	1.08805e-07
4400	1.18737e-07
4500	1.24283e-07
4600	1.11577e-07
4700	1.05662e-07
4800	1.21863e-07
4900	1.38791e-07
5000	1.34128e-07
5100	1.27299e-07
5200	1.24143e-07
5300	1.23591e-07
5400	1.14543e-07
5500	1.08937e-07
5600	1.2509e-07
5700	1.21658e-07
5800	1.17347e-07
5900	1.17992e-07
6000	1.27333e-07
6100	1.21571e-07
6200	1.16126e-07
6300	1.19573e-07
6400	1.1968e-07
6500	1.17794e-07
6600	1.14732e-07
6700	1.20621e-07
6800	1.21835e-07
6900	1.25326e-07
7000	1.25368e-07
7100	1.22702e-07
7200	1.18097e-07
7300	1.11782e-07
7400	1.20557e-07
7500	1.26679e-07
7600	1.23703e-07
7700	1.16851e-07
7800	1.32957e-07
7900	1.37038e-07
8000	1.15131e-07
8100	1.20184e-07
8200	1.21864e-07
8300	1.12481e-07
8400	1.18267e-07
8500	1.08842e-07
8600	1.13908e-07
8700	1.17817e-07
8800	1.05989e-07
8900	1.15066e-07
9000	1.25546e-07
9100	1.25266e-07
9200	1.20842e-07
9300	1.26453e-07
9400	1.21146e-07
9500	1.15822e-07
9600	1.18723e-07
9700	1.12108e-07
9800	1.19001e-07
9900	1.18975e-07
10000	1.06547e-07
10100	1.11834e-07
10200	1.28676e-07
10300	1.29217e-07
10400	1.26409e-07
10500	1.28177e-07
10600	1.19823e-07
10700	1.17958e-07
10800	1.10766e-07
10900	1.18836e-07
11000	1.13332e-07
11100	1.10351e-07
11200	1.19149e-07
11300	1.17809e-07
11400	1.15156e-07
11500	1.12459e-07
11600	1.14228e-07
11700	1.19309e-07
11800	1.21717e-07
11900	1.20978e-07
12000	1.22369e-07
12100	1.26795e-07
12200	1.29048e-07
12300	1.19413e-07
12400	1.19875e-07
12500	1.18334e-07
12600	1.23717e-07
12700	1.27033e-07
12800	1.18667e-07
12900	1.25745e-07
13000	1.18355e-07
13100	1.16887e-07
13200	1.10369e-07
13300	1.14198e-07
13400	1.33162e-07
13500	1.20579e-07
13600	1.16325e-07
13700	1.26679e-07
13800	1.20207e-07
13900	1.17645e-07
14000	1.29264e-07
14100	1.34281e-07
14200	1.28049e-07
14300	1.18479e-07
14400	1.02558e-07
14500	1.12344e-07
14600	1.18201e-07
14700	1.26632e-07
14800	1.17915e-07
14900	1.18891e-07
15000	1.19348e-07
15100	1.24592e-07
15200	1.25342e-07
15300	1.19888e-07
15400	1.20491e-07
15500	1.25201e-07
15600	1.23005e-07
15700	1.24847e-07
15800	1.2478e-07
15900	1.13241e-07
16000	1.13073e-07
16100	1.1936e-07
16200	1.1166e-07
16300	1.09776e-07
16400	1.09331e-07
16500	1.2307e-07
16600	1.18908e-07
16700	1.25586e-07
16800	1.27546e-07
16900	1.1984e-07
17000	1.20058e-07
17100	1.14831e-07
17200	1.21622e-07
17300	1.16912e-07
17400	1.16533e-07
17500	1.18172e-07
17600	1.1257e-07
17700	1.20359e-07
17800	1.19313e-07
17900	1.21266e-07
18000	1.19014e-07
18100	1.16252e-07
18200	1.23937e-07
18300	1.20047e-07
18400	1.14495e-07
18500	1.15118e-07
18600	1.12027e-07
18700	9.92922e-08
18800	1.09264e-07
18900	1.22128e-07
19000	1.16957e-07
19100	1.15362e-07
19200	1.20068e-07
19300	1.32123e-07
19400	1.24368e-07
19500	1.2197e-07
19600	1.31266e-07
19700	1.32752e-07
19800	1.26193e-07
19900	1.2369e-07
20000	1.15171e-07
20100	1.06724e-07
20200	1.16943e-07
20300	1.15158e-07
20400	1.14016e-07
20500	1.09686e-07
20600	1.13352e-07
20700	1.12539e-07
20800	1.09551e-07
20900	1.16365e-07
21000	1.28871e-07
21100	1.23737e-07
21200	1.1454e-07
21300	1.1898e-07
21400	1.28946e-07
21500	1.27538e-07
21600	1.23278e-07
21700	1.11982e-07
21800	1.12256e-07
21900	1.23122e-07
22000	1.25057e-07
22100	1.14158e-07
22200	1.10063e-07
22300	1.16693e-07
22400	1.1567e-07
22500	1.2374e-07
22600	1.23333e-07
22700	1.16132e-07
22800	1.22448e-07
22900	1.27842e-07
23000	1.28204e-07
23100	1.24514e-07
23200	1.17256e-07
23300	1.04285e-07
23400	1.16619e-07
23500	1.25022e-07
23600	1.32456e-07
23700	1.192e-07
23800	1.17984e-07
23900	1.19406e-07
24000	1.17311e-07
24100	1.30151e-07
24200	1.20378e-07
24300	1.21544e-07
24400	1.0876e-07
24500	1.0381e-07
24600	1.16219e-07
24700	1.14629e-07
24800	1.17732e-07
24900	1.29043e-07
25000	1.12921e-07
25100	1.09576e-07
25200	1.21968e-07
25300	1.19043e-07
25400	1.14222e-07
25500	1.21612e-07
25600	1.14813e-07
25700	1.14066e-07
25800	1.2446e-07
25900	1.17727e-07
26000	1.1382e-07
26100	1.14547e-07
26200	1.17576e-07
26300	1.20731e-07
26400	1.24385e-07
26500	1.16038e-07
26600	1.19296e-07
26700	1.13114e-07
26800	1.16288e-07
26900	1.20805e-07
27000	1.2331e-07
27100	1.29168e-07
27200	1.2364e-07
27300	1.1864e-07
27400	1.221e-07
27500	1.18671e-07
27600	1.12677e-07
27700	1.27535e-07
27800	1.26337e-07
27900	1.22376e-07
28000	1.11946e-07
28100	1.1919e-07
28200	1.22829e-07
28300	1.19016e-07
28400	1.20623e-07
28500	1.16667e-07
28600	1.06818e-07
28700	1.17301e-07
28800	1.19645e-07
28900	1.2422e-07
29000	1.17042e-07
29100	1.13147e-07
29200	1.18162e-07
29300	1.31978e-07
29400	1.29202e-07
29500	1.18987e-07
29600	1.26522e-07
29700	1.2173e-07
29800	1.02339e-07
29900	1.0168e-07
30000	1.04868e-07
30100	1.086e-07
30200	1.09438e-07
30300	1.11149e-07
30400	1.11334e-07
30500	1.1273e-07
30600	1.13333e-07
30700	1.13717e-07
30800	1.28504e-07
30900	1.23748e-07
31000	1.23574e-07
31100	1.18931e-07
31200	1.16793e-07
31300	1.14068e-07
31400	1.16605e-07
31500	1.20063e-07
31600	1.2024e-07
31700	1.16569e-07
31800	1.13177e-07
31900	1.14523e-07
32000	1.11868e-07
32100	1.19382e-07
32200	1.1796e-07
32300	1.15326e-07
32400	1.15978e-07
32500	1.2613e-07
32600	1.19289e-07
32700	1.25392e-07
32800	1.23217e-07
32900	1.02923e-07
33000	1.13374e-07
33100	1.29252e-07
33200	1.21487e-07
33300	1.16622e-07
33400	1.15871e-07
33500	1.1888e-07
33600	1.15624e-07
33700	1.20755e-07
33800	1.18031e-07
33900	1.18089e-07
34000	1.22047e-07
34100	1.10338e-07
34200	1.04003e-07
34300	1.22077e-07
34400	1.2038e-07
34500	1.23044e-07
34600	1.15311e-07
34700	1.03501e-07
34800	1.11348e-07
34900	1.20326e-07
35000	1.12808e-07
35100	1.16153e-07
35200	1.19355e-07
35300	1.12844e-07
35400	1.24685e-07
35500	1.24138e-07
35600	1.20749e-07
35700	1.31626e-07
35800	1.22966e-07
35900	1.07711e-07
36000	1.189e-07
36100	1.17961e-07
36200	1.16567e-07
36300	1.18861e-07
36400	1.19029e-07
36500	1.17026e-07
36600	1.14236e-07
36700	1.13736e-07
36800	1.12048e-07
36900	2.21152e-06
37000	1.41633e-05
37100	5.77888e-06
37200	1.38873e-07
37300	1.12728e-07
37400	1.26072e-07
37500	1.17989e-07
37600	1.06731e-07
37700	1.1082e-07
37800	1.1255e-07
37900	1.14933e-07
38000	1.20681e-07
38100	1.18569e-07
38200	1.27589e-07
38300	1.19246e-07
38400	1.23575e-07
38500	1.24351e-07
38600	1.29771e-07
38700	1.33509e-07
38800	1.27115e-07
38900	1.16674e-07
39000	1.20372e-07
39100	1.13487e-07
39200	1.18713e-07
39300	1.32566e-07
39400	1.28432e-07
39500	1.24916e-07
39600	1.21933e-07
39700	1.07524e-07
39800	1.18085e-07
39900	1.14199e-07
40000	1.16783e-07
40100	1.25832e-07
40200	1.25031e-07
40300	1.19043e-07
40400	1.25523e-07
40500	1.28636e-07
40600	1.24827e-07
40700	1.07774e-07
40800	1.08316e-07
40900	1.13602e-07
41000	1.08883e-07
41100	1.10482e-07
41200	1.13056e-07
41300	1.21939e-07
41400	1.69013e-07
41500	3.59704e-07
41600	1.07173e-06
41700	3.01635e-06
41800	5.92695e-06
41900	6.40943e-06
42000	3.90548e-06
42100	7.4111e-06
42200	1.15966e-05
42300	2.61742e-05
42400	1.61251e-05
42500	9.08479e-06
42600	1.37346e-05
42700	7.5267e-06
42800	1.70296e-06
42900	3.3557e-07
43000	1.45183e-07
43100	1.18906e-07
43200	1.19991e-07
43300	1.89866e-07
43400	3.03064e-07
43500	1.50643e-07
43600	1.16225e-07
43700	1.29582e-07
43800	1.1966e-07
43900	1.22473e-07
44000	1.19101e-07
44100	1.31179e-07
44200	1.68956e-07
44300	1.16668e-07
44400	1.10355e-07
44500	1.28266e-07
44600	1.23325e-07
44700	1.25427e-07
44800	1.27047e-07
44900	2.31226e-07
45000	2.96716e-07
45100	1.33224e-07
45200	1.14923e-07
45300	1.11173e-07
45400	1.09263e-07
45500	1.29539e-07
45600	1.26169e-07
45700	1.14211e-07
45800	1.15369e-07
45900	1.14663e-07
46000	1.07586e-07
46100	1.05561e-07
46200	1.14541e-07
46300	1.20584e-07
46400	1.13501e-07
46500	1.13032e-07
46600	1.11467e-07
46700	1.15059e-07
46800	1.14651e-07
46900	1.18173e-07
47000	1.19992e-07
47100	1.16312e-07
47200	1.16067e-07
47300	1.30114e-07
47400	1.25466e-07
47500	1.19204e-07
47600	1.18572e-07
47700	1.07044e-07
47800	1.14803e-07
47900	1.24002e-07
48000	1.22528e-07
48100	1.1563e-07
48200	1.09516e-07
48300	1.15313e-07
48400	1.30408e-07
48500	1.27465e-07
48600	1.1831e-07
48700	1.13474e-07
48800	1.08953e-07
48900	1.04793e-07
49000	1.06371e-07
49100	1.15012e-07
49200	1.30567e-07
49300	1.34555e-07
49400	1.37265e-07
49500	1.25214e-07
49600	1.18456e-07
49700	1.26201e-07
49800	1.27613e-07
49900	1.1692e-07
50000	1.2692e-07
50100	1.28109e-07
50200	1.3161e-07
50300	1.37319e-07
50400	1.2175e-07
50500	1.2093e-07
50600	1.38319e-07
50700	1.281e-07
50800	1.28192e-07
50900	1.27352e-07
51000	1.25863e-07
51100	1.21555e-07
51200	1.25097e-07
51300	1.19247e-07
51400	1.27779e-07
51500	1.30929e-07
51600	1.22387e-07
51700	1.26836e-07
51800	1.3985e-07
51900	1.29349e-07
52000	1.16847e-07
52100	1.27269e-07
52200	1.18852e-07
52300	1.22661e-07
52400	1.18491e-07
52500	1.04139e-07
52600	1.16943e-07
52700	1.1991e-07
52800	1.21457e-07
52900	1.2134e-07
53000	1.23569e-07
53100	1.31946e-07
53200	1.24951e-07
53300	1.07193e-07
53400	1.11558e-07
53500	1.153e-07
53600	1.20612e-07
53700	1.24931e-07
53800	1.33183e-07
53900	1.20122e-07
54000	1.11941e-07
54100	1.08628e-07
54200	1.14033e-07
54300	1.25486e-07
54400	1.27666e-07
54500	1.19659e-07
54600	1.21191e-07
54700	1.11543e-07
54800	1.06923e-07
54900	1.13406e-07
55000	1.19799e-07
55100	1.10147e-07
55200	1.13502e-07
55300	1.27862e-07
55400	1.34474e-07
55500	1.18832e-07
55600	1.21668e-07
55700	1.20558e-07
55800	1.21827e-07
55900	1.15331e-07
56000	1.04877e-07
56100	9.743e-08
56200	1.14391e-07
56300	1.18663e-07
56400	1.22151e-07
56500	1.30693e-07
56600	1.26984e-07
56700	1.15265e-07
56800	1.18055e-07
56900	1.11957e-07
57000	1.15668e-07
57100	1.14936e-07
57200	1.20432e-07
57300	1.21824e-07
57400	1.23442e-07
57500	1.22147e-07
57600	1.17615e-07
57700	1.24682e-07
57800	1.22546e-07
57900	1.20009e-07
58000	1.22336e-07
58100	1.22006e-07
58200	1.17059e-07
58300	1.09802e-07
58400	1.13903e-07
58500	1.18173e-07
58600	1.30015e-07
58700	1.23682e-07
58800	1.09985e-07
58900	1.07223e-07
59000	1.13046e-07
59100	1.20079e-07
59200	1.14531e-07
59300	1.22085e-07
59400	1.23843e-07
59500	1.25154e-07
59600	1.30126e-07
59700	1.3993e-07
59800	4.82313e-06
59900	3.40501e-05
60000	1.46079e-05
60100	1.77733e-07
60200	1.26144e-07
60300	1.11368e-07
60400	1.12219e-07
60500	1.18565e-07
60600	1.16599e-07
60700	1.11156e-07
60800	1.16962e-07
60900	1.16232e-07
61000	1.17542e-07
61100	1.1498e-07
61200	1.1209e-07
61300	1.20009e-07
61400	1.30454e-07
61500	1.19361e-07
61600	1.22018e-07
61700	1.33214e-07
61800	1.19776e-07
61900	1.15143e-07
62000	1.19559e-07
62100	1.17222e-07
62200	1.12383e-07
62300	1.17303e-07
62400	1.26584e-07
62500	1.19609e-07
62600	1.25574e-07
62700	1.34917e-07
62800	1.22388e-07
62900	1.14788e-07
63000	1.17613e-07
63100	1.24998e-07
63200	1.30014e-07
63300	1.18612e-07
63400	1.15389e-07
63500	1.24601e-07
63600	1.34447e-07
63700	1.20572e-07
63800	1.13762e-07
63900	1.25464e-07
64000	1.26662e-07
64100	1.26929e-07
64200	1.25386e-07
64300	1.16631e-07
64400	1.14226e-07
64500	1.15072e-07
64600	1.17527e-07
64700	1.16201e-07
64800	1.21358e-07
64900	1.22751e-07
65000	1.15582e-07
65100	1.22251e-07
65200	1.28063e-07
65300	1.18359e-07
65400	1.03812e-07
65500	1.16859e-07
65600	1.2084e-07
65700	1.18239e-07
65800	1.18712e-07
65900	1.2243e-07
66000	1.31564e-07
66100	1.25418e-07
66200	1.26005e-07
66300	1.31688e-07
66400	1.20383e-07
66500	1.1309e-07
66600	1.21133e-07
66700	1.25e-07
66800	1.32286e-07
66900	1.31318e-07
67000	1.3709e-07
67100	1.62346e-07
67200	2.66902e-07
67300	2.71989e-07
67400	1.93708e-07
67500	1.38006e-07
67600	1.33587e-07
67700	1.37545e-07
67800	1.63531e-07
67900	1.94668e-07
68000	2.88112e-07
68100	4.16801e-07
68200	9.03002e-07
68300	4.65134e-06
68400	3.54479e-06
68500	2.10757e-06
68600	6.36784e-07
68700	2.96103e-07
68800	1.77697e-07
68900	1.42068e-07
69000	1.43008e-07
69100	1.2693e-07
69200	1.32225e-07
69300	1.39788e-07
69400	1.23403e-07
69500	1.25183e-07
69600	1.18686e-07
69700	1.13475e-07
69800	1.13255e-07
69900	1.27938e-07
70000	1.3057e-07
70100	1.23284e-07
70200	1.22938e-07
70300	1.22781e-07
70400	1.18775e-07
70500	1.10685e-07
70600	1.23237e-07
70700	1.28921e-07
70800	1.24354e-07
70900	1.24763e-07
71000	1.32858e-07
71100	1.23543e-07
71200	1.19535e-07
71300	1.19957e-07
71400	1.22952e-07
71500	1.35397e-07
71600	1.26523e-07
71700	1.22612e-07
71800	1.14376e-07
71900	1.19788e-07
72000	1.27115e-07
72100	1.31913e-07
72200	1.28296e-07
72300	1.26055e-07
72400	1.22361e-07
72500	1.18925e-07
72600	1.27811e-07
72700	1.33812e-07
72800	1.27507e-07
72900	1.20395e-07
73000	1.03627e-07
73100	1.11704e-07
73200	1.21996e-07
73300	1.17665e-07
73400	1.02926e-07
73500	1.08824e-07
73600	1.12424e-07
73700	1.21799e-07
73800	1.18721e-07
73900	3.51223e-07
74000	2.65453e-06
74100	1.68024e-06
74200	1.46787e-07
74300	1.22474e-07
74400	1.23178e-07
74500	1.1877e-07
74600	1.17659e-07
74700	1.1509e-07
74800	1.10833e-07
74900	1.2078e-07
75000	1.26549e-07
75100	1.05361e-07
75200	1.06907e-07
75300	1.11306e-07
75400	1.13531e-07
75500	1.18641e-07
75600	1.24883e-07
75700	1.11516e-07
75800	1.17026e-07
75900	1.20016e-07
76000	1.10317e-07
76100	1.09951e-07
76200	1.21004e-07
76300	1.10995e-07
76400	1.22022e-07
76500	1.18809e-07
76600	1.14745e-07
76700	1.15006e-07
76800	1.1271e-07
76900	1.17555e-07
77000	1.29964e-07
77100	1.20975e-07
77200	1.14102e-07
77300	1.1398e-07
77400	1.12322e-07
77500	1.20923e-07
77600	1.18255e-07
77700	1.14541e-07
77800	1.14254e-07
77900	1.08271e-07
78000	1.21203e-07
78100	1.24635e-07
78200	1.16975e-07
78300	1.19964e-07
78400	1.26798e-07
78500	1.22818e-07
78600	1.24096e-07
78700	1.33297e-07
78800	1.25215e-07
78900	1.13151e-07
79000	1.15732e-07
79100	1.28967e-07
79200	1.24598e-07
79300	1.15347e-07
79400	1.15242e-07
79500	1.11366e-07
79600	1.07821e-07
79700	1.15121e-07
79800	1.15123e-07
79900	1.19217e-07
80000	1.19185e-07
80100	1.23926e-07
80200	1.1947e-07
80300	1.1344e-07
80400	1.17772e-07
80500	1.30111e-07
80600	1.22074e-07
80700	1.15838e-07
80800	1.07775e-07
80900	1.11747e-07
81000	1.19894e-07
81100	1.19118e-07
81200	1.11486e-07
81300	1.0865e-07
81400	1.08118e-07
81500	1.16605e-07
81600	1.05137e-07
81700	1.14129e-07
81800	1.24976e-07
81900	1.15638e-07
82000	1.17482e-07
82100	1.2246e-07
82200	1.2059e-07
82300	1.16687e-07
82400	1.17806e-07
82500	1.23066e-07
82600	1.28087e-07
82700	1.3029e-07
82800	1.20176e-07
82900	1.07192e-07
83000	1.16099e-07
83100	1.1957e-07
83200	1.33359e-07
83300	1.46069e-07
83400	1.50387e-07
83500	1.683e-07
83600	1.81177e-07
83700	1.57707e-07
83800	1.31798e-07
83900	1.55076e-07
84000	1.67317e-07
84100	1.42424e-07
84200	1.62978e-07
84300	1.61916e-07
84400	2.0189e-07
84500	2.45082e-07
84600	2.99174e-07
84700	2.80543e-07
84800	2.23701e-07
84900	1.8442e-07
85000	1.64644e-07
85100	1.53508e-07
85200	1.83672e-07
85300	2.06998e-07
85400	1.69045e-07
85500	1.35546e-07
85600	1.26822e-07
85700	1.23215e-07
85800	1.11223e-07
85900	1.09589e-07
86000	1.299e-07
86100	1.23251e-07
86200	1.24014e-07
86300	1.21339e-07
86400	1.27091e-07
86500	1.16516e-07
86600	1.07886e-07
86700	1.10535e-07
86800	1.10258e-07
86900	1.17183e-07
87000	1.15161e-07
87100	1.0405e-07
87200	1.10224e-07
87300	1.18895e-07
87400	1.34147e-07
87500	1.41038e-07
87600	1.23262e-07
87700	1.15249e-07
87800	1.08334e-07
87900	1.16867e-07
88000	1.18296e-07
88100	1.23532e-07
88200	1.21326e-07
88300	1.22329e-07
88400	1.18437e-07
88500	1.1632e-07
88600	1.10491e-07
88700	1.21751e-07
88800	1.29218e-07
88900	1.27308e-07
89000	1.19954e-07
89100	1.19413e-07
89200	1.20138e-07
89300	1.19721e-07
89400	1.16033e-07
89500	1.21412e-07
89600	1.18644e-07
89700	1.0731e-07
89800	1.0735e-07
89900	1.25362e-07
90000	1.24832e-07
90100	1.1325e-07
90200	1.1998e-07
90300	1.19349e-07
90400	1.2009e-07
90500	1.24631e-07
90600	1.23078e-07
90700	1.08231e-07
90800	1.16086e-07
90900	1.21766e-07
91000	1.26148e-07
91100	1.2531e-07
91200	1.19023e-07
91300	1.20446e-07
91400	1.14801e-07
91500	1.0818e-07
91600	1.17663e-07
91700	1.17254e-07
91800	1.24472e-07
91900	1.27842e-07
92000	1.23625e-07
92100	1.2402e-07
92200	1.27803e-07
92300	1.23218e-07
92400	1.25465e-07
92500	1.13484e-07
92600	1.23091e-07
92700	1.17372e-07
92800	1.14096e-07
92900	1.13202e-07
93000	1.1879e-07
93100	1.21046e-07
93200	1.29993e-07
93300	1.21773e-07
93400	1.14442e-07
93500	1.13521e-07
93600	1.16379e-07
93700	1.21005e-07
93800	1.20051e-07
93900	1.08641e-07
94000	1.13838e-07
94100	1.1921e-07
94200	1.16072e-07
94300	1.13966e-07
94400	1.16401e-07
94500	1.24406e-07
94600	1.14531e-07
94700	1.07245e-07
94800	1.15289e-07
94900	1.11852e-07
95000	1.06355e-07
95100	1.1532e-07
95200	1.2523e-07
95300	1.17208e-07
95400	1.15586e-07
95500	1.22178e-07
95600	1.14668e-07
95700	1.15397e-07
95800	1.16974e-07
95900	1.17597e-07
96000	1.25455e-07
96100	1.29644e-07
96200	1.20295e-07
96300	1.25644e-07
96400	1.24643e-07
96500	1.23627e-07
96600	1.15113e-07
96700	1.21141e-07
96800	1.19027e-07
96900	1.27173e-07
97000	1.2606e-07
97100	1.26914e-07
97200	1.26651e-07
97300	1.20886e-07
97400	1.14735e-07
97500	1.11897e-07
97600	1.15722e-07
97700	1.19159e-07
97800	1.20494e-07
97900	1.17641e-07
98000	1.10387e-07
98100	1.14597e-07
98200	1.28979e-07
98300	1.27342e-07
98400	1.25008e-07
98500	1.13084e-07
98600	1.08515e-07
98700	1.22645e-07
98800	1.25934e-07
98900	1.13059e-07
99000	1.35378e-07
99100	1.3373e-07
99200	1.09857e-07
99300	1.13343e-07
99400	1.25342e-07
99500	1.13739e-07
99600	1.10981e-07
99700	1.26021e-07
99800	1.27196e-07
99900	1.24765e-07
100000	1.32573e-07
100100	1.39717e-07
100200	1.24763e-07
100300	1.30517e-07
100400	1.32091e-07
100500	1.18804e-07
100600	1.13715e-07
100700	1.22379e-07
100800	1.28264e-07
100900	1.27039e-07
101000	1.22289e-07
101100	1.32807e-07
101200	1.22151e-07
101300	1.16252e-07
101400	1.21515e-07
101500	1.20419e-07
101600	1.25879e-07
101700	1.22484e-07
101800	1.25293e-07
101900	1.23491e-07
102000	1.24137e-07
102100	1.16612e-07
102200	1.18321e-07
102300	1.20101e-07
102400	1.23423e-07
102500	1.18642e-07
102600	1.2353e-07
102700	1.15013e-07
102800	1.18587e-07
102900	1.1329e-07
103000	1.16357e-07
103100	1.07479e-07
103200	1.13551e-07
103300	1.11378e-07
103400	1.1983e-07
103500	1.23256e-07
103600	1.17619e-07
103700	1.23611e-07
103800	1.28261e-07
103900	1.26077e-07
104000	1.22071e-07
104100	1.28772e-07
104200	1.22935e-07
104300	1.26574e-07
104400	1.25614e-07
104500	1.17445e-07
104600	1.12359e-07
104700	1.25949e-07
104800	1.19723e-07
104900	1.07806e-07
105000	1.15794e-07
105100	1.29504e-07
105200	1.29829e-07
105300	1.25711e-07
105400	1.20408e-07
105500	1.18402e-07
105600	1.14776e-07
105700	1.15587e-07
105800	1.29171e-07
105900	1.1658e-07
106000	1.16628e-07
106100	1.1782e-07
106200	1.23596e-07
106300	1.1693e-07
106400	1.14266e-07
106500	1.17438e-07
106600	1.25497e-07
106700	1.21636e-07
106800	1.16157e-07
106900	1.17483e-07
107000	1.25077e-07
107100	1.15876e-07
107200	1.08257e-07
107300	1.1579e-07
107400	1.23702e-07
107500	1.206e-07
107600	1.2499e-07
107700	1.30417e-07
107800	1.08793e-07
107900	1.11143e-07
108000	1.19927e-07
108100	1.19886e-07
108200	1.1564e-07
108300	1.12106e-07
108400	1.23506e-07
108500	1.23486e-07
108600	1.17836e-07
108700	1.13981e-07
108800	1.1799e-07
108900	1.14501e-07
109000	1.04315e-07
109100	1.10024e-07
109200	1.27181e-07
109300	1.30676e-07
109400	1.27813e-07
109500	1.10192e-07
109600	1.1266e-07
109700	1.28762e-07
109800	1.21745e-07
109900	1.07043e-07
110000	1.09848e-07
110100	1.17965e-07
110200	1.18358e-07
110300	1.04734e-07
110400	1.09172e-07
110500	1.07411e-07
110600	1.12342e-07
110700	1.21247e-07
110800	1.16271e-07
110900	1.51421e-07
111000	9.01099e-07
111100	8.93137e-07
111200	1.48821e-07
111300	1.12245e-07
111400	1.2648e-07
111500	1.13369e-07
111600	1.11881e-07
111700	1.17533e-07
111800	1.11441e-07
111900	1.16199e-07
112000	1.23365e-07
112100	1.35948e-07
112200	1.34897e-07
112300	1.1374e-07
112400	1.11522e-07
112500	1.14589e-07
112600	1.16818e-07
112700	1.09537e-07
112800	1.0699e-07
112900	1.1143e-07
113000	1.25585e-07
113100	1.28106e-07
113200	1.2193e-07
113300	1.21365e-07
113400	1.23967e-07
113500	1.26077e-07
113600	1.19447e-07
113700	1.2059e-07
113800	1.31507e-07
113900	1.29811e-07
114000	1.25209e-07
114100	1.23165e-07
114200	1.1445e-07
114300	1.10633e-07
114400	1.21334e-07
114500	1.25109e-07
114600	1.19034e-07
114700	1.12373e-07
114800	1.19232e-07
114900	1.23195e-07
115000	1.13926e-07
115100	1.17091e-07
115200	1.12771e-07
115300	1.18139e-07
115400	1.19311e-07
115500	1.12851e-07
115600	1.19345e-07
115700	1.11571e-07
115800	1.12301e-07
115900	1.23533e-07
116000	1.16284e-07
116100	1.25122e-07
116200	1.22877e-07
116300	1.14902e-07
116400	1.21545e-07
116500	1.22736e-07
116600	1.13272e-07
116700	9.40141e-08
116800	1.06049e-07
116900	1.23783e-07
117000	1.21041e-07
117100	1.33404e-07
117200	1.26037e-07
117300	1.19742e-07
117400	1.14197e-07
117500	1.12235e-07
117600	1.11114e-07
117700	1.06532e-07
117800	1.06591e-07
117900	1.1334e-07
118000	1.15416e-07
118100	1.14709e-07
118200	1.11694e-07
118300	1.05073e-07
118400	1.15217e-07
118500	1.21131e-07
118600	1.19445e-07
118700	1.1539e-07
118800	1.06339e-07
118900	1.14523e-07
119000	1.23717e-07
119100	1.24836e-07
119200	1.17732e-07
119300	1.21296e-07
119400	1.19718e-07
119500	1.18885e-07
119600	1.09814e-07
119700	1.14334e-07
119800	2.05723e-07
119900	1.8041e-07
120000	1.10945e-07
120100	1.14581e-07
120200	1.11328e-07
120300	1.08537e-07
120400	1.15869e-07
120500	1.10314e-07
120600	1.07724e-07
120700	1.08897e-07
120800	1.14318e-07
120900	1.24343e-07
121000	1.24394e-07
121100	1.20095e-07
121200	1.22747e-07
121300	1.22706e-07
121400	1.20326e-07
121500	1.1585e-07
121600	1.29349e-07
121700	1.18637e-07
121800	1.17564e-07
121900	1.27982e-07
122000	1.25719e-07
122100	1.23744e-07
122200	1.2991e-07
122300	1.31959e-07
122400	1.16348e-07
122500	1.10068e-07
122600	1.11488e-07
122700	1.105e-07
122800	1.14552e-07
122900	1.0809e-07
123000	1.11006e-07
123100	1.31088e-07
123200	1.2061e-07
123300	1.23412e-07
123400	1.15732e-07
123500	1.23737e-07
123600	1.22345e-07
123700	1.0867e-07
123800	1.16489e-07
123900	1.20694e-07
124000	1.20131e-07
124100	1.22192e-07
124200	1.21919e-07
124300	1.25021e-07
124400	1.16542e-07
124500	1.15073e-07
124600	1.22662e-07
124700	1.23968e-07
124800	1.37548e-07
124900	1.75854e-07
125000	2.68126e-07
125100	4.26102e-07
125200	6.12099e-07
125300	7.47513e-07
125400	6.83982e-07
125500	3.70515e-07
125600	2.41768e-07
125700	4.97707e-07
125800	5.87501e-07
125900	3.46151e-07
126000	4.9386e-07
126100	5.96929e-07
126200	4.80254e-07
126300	6.84721e-07
126400	5.77089e-07
126500	7.8218e-07
126600	9.28142e-07
126700	1.35664e-06
126800	2.2349e-06
126900	2.23888e-06
127000	2.51116e-06
127100	2.55875e-06
127200	1.18034e-06
127300	7.70603e-07
127400	7.3328e-07
127500	7.66815e-07
127600	8.39498e-07
127700	8.91958e-07
127800	7.83647e-07
127900	1.56391e-06
128000	1.67376e-06
128100	9.69964e-07
128200	4.05164e-07
128300	1.80509e-07
128400	1.24732e-07
128500	1.17027e-07
128600	1.15901e-07
128700	1.23912e-07
128800	1.19449e-07
128900	1.2544e-07
129000	1.26691e-07
129100	1.23955e-07
129200	1.24242e-07
129300	1.22401e-07
129400	1.1877e-07
129500	1.10645e-07
129600	1.18276e-07
129700	1.2772e-07
129800	1.15217e-07
129900	1.08177e-07
130000	1.15363e-07
130100	1.24363e-07
130200	1.14683e-07
130300	1.08374e-07
130400	1.19298e-07
130500	1.14283e-07
130600	1.21449e-07
130700	1.2353e-07
130800	1.14343e-07
130900	1.20052e-07
131000	1.09581e-07
131100	1.0172e-07
131200	1.07214e-07
131300	1.16317e-07
131400	1.23792e-07
131500	1.24344e-07
131600	1.26022e-07
131700	1.20004e-07
131800	1.23253e-07
131900	1.25204e-07
132000	1.203e-07
132100	1.26761e-07
132200	1.24644e-07
132300	1.16552e-07
132400	1.0773e-07
132500	1.21748e-07
132600	1.11263e-07
132700	1.13183e-07
132800	1.09038e-07
132900	1.19708e-07
133000	1.30534e-07
133100	1.2348e-07
133200	1.34156e-07
133300	1.2134e-07
133400	1.23789e-07
133500	1.34195e-07
133600	1.2196e-07
133700	1.07258e-07
133800	1.12076e-07
133900	1.21938e-07
134000	1.12511e-07
134100	1.11933e-07
134200	1.11787e-07
134300	1.09889e-07
134400	1.22459e-07
134500	1.22311e-07
134600	1.15486e-07
134700	1.21794e-07
134800	1.17847e-07
134900	1.12371e-07
135000	1.234e-07
135100	1.20852e-07
135200	1.22361e-07
135300	1.13292e-07
135400	1.09067e-07
135500	1.09583e-07
135600	1.15083e-07
135700	1.07249e-07
135800	1.07547e-07
135900	1.16613e-07
136000	1.13782e-07
136100	1.22711e-07
136200	1.237e-07
136300	1.19138e-07
136400	1.07367e-07
136500	1.1012e-07
136600	1.16252e-07
136700	1.12647e-07
136800	1.08825e-07
136900	9.69436e-08
137000	1.05939e-07
137100	1.17983e-07
137200	1.17697e-07
137300	1.15116e-07
137400	1.07754e-07
137500	1.10381e-07
137600	1.15358e-07
137700	1.26202e-07
137800	1.22067e-07
137900	1.01905e-07
138000	1.03443e-07
138100	1.18577e-07
138200	1.1712e-07
138300	1.08852e-07
138400	1.10492e-07
138500	1.12666e-07
138600	1.11799e-07
138700	1.08822e-07
138800	1.14649e-07
138900	1.1477e-07
139000	1.15891e-07
139100	1.15479e-07
139200	1.10122e-07
139300	1.05847e-07
139400	1.12124e-07
139500	1.04104e-07
139600	1.17502e-07
139700	1.28735e-07
139800	1.12043e-07
139900	1.11578e-07
140000	1.18908e-07
140100	1.131e-07
140200	1.20875e-07
140300	1.21454e-07
140400	1.20572e-07
140500	1.14241e-07
140600	1.12405e-07
140700	1.18566e-07
140800	1.22179e-07
140900	1.16718e-07
141000	1.21083e-07
141100	1.20312e-07
141200	1.20627e-07
141300	1.23436e-07
141400	1.11165e-07
141500	1.06981e-07
141600	1.1632e-07
141700	1.14988e-07
141800	1.15927e-07
141900	1.19292e-07
142000	1.32132e-07
142100	1.24647e-07
142200	1.24317e-07
142300	1.17665e-07
142400	1.26187e-07
142500	1.09571e-07
142600	9.89621e-08
142700	1.11944e-07
142800	1.10603e-07
142900	1.08436e-07
143000	1.15229e-07
143100	1.23493e-07
143200	1.10827e-07
143300	1.0618e-07
143400	1.09037e-07
143500	1.04427e-07
143600	1.05272e-07
143700	1.01419e-07
143800	1.13916e-07
143900	1.21246e-07
144000	1.16623e-07
144100	9.89666e-08
144200	1.09654e-07
144300	1.24963e-07
144400	1.09464e-07
144500	1.09015e-07
144600	1.26058e-07
144700	1.20529e-07
144800	1.19534e-07
144900	1.27982e-07
145000	1.10131e-07
145100	1.0314e-07
145200	1.08608e-07
145300	1.1394e-07
145400	1.20086e-07
145500	1.15664e-07
145600	1.18148e-07
145700	1.22984e-07
145800	1.19819e-07
145900	1.18277e-07
146000	1.15534e-07
146100	1.13392e-07
146200	1.12975e-07
146300	1.2487e-07
146400	1.19623e-07
146500	1.19941e-07
146600	1.07775e-07
146700	1.10507e-07
146800	1.21879e-07
146900	1.19122e-07
147000	1.00512e-07
147100	1.12305e-07
147200	1.17009e-07
147300	1.04773e-07
147400	1.01216e-07
147500	1.14737e-07
147600	1.16883e-07
147700	1.15861e-07
147800	1.2237e-07
147900	1.15525e-07
148000	1.74927e-07
148100	2.14445e-07
148200	1.32226e-07
148300	1.07422e-07
148400	1.15986e-07
148500	1.1693e-07
148600	1.05411e-07
148700	1.11598e-07
148800	1.19136e-07
148900	1.16266e-07
149000	1.08624e-07
149100	1.14097e-07
149200	1.08403e-07
149300	1.08131e-07
149400	1.16387e-07
149500	1.24245e-07
149600	1.24393e-07
149700	1.19313e-07
149800	1.21731e-07
149900	1.18605e-07
150000	1.23276e-07
150100	1.12875e-07
150200	1.18049e-07
150300	1.14883e-07
150400	1.14275e-07
150500	1.13465e-07
150600	1.12761e-07
150700	1.06632e-07
150800	1.0847e-07
150900	1.27979e-07
151000	1.20583e-07
151100	1.14051e-07
151200	1.18396e-07
151300	1.15725e-07
151400	1.09016e-07
151500	1.10473e-07
151600	1.16293e-07
151700	1.23546e-07
151800	1.14843e-07
151900	1.08103e-07
152000	1.06917e-07
152100	1.09965e-07
152200	1.10862e-07
152300	1.08534e-07
152400	1.11627e-07
152500	1.18509e-07
152600	1.15979e-07
152700	1.16831e-07
152800	1.21596e-07
152900	1.09034e-07
153000	1.14022e-07
153100	1.27078e-07
153200	1.27602e-07
153300	1.15037e-07
153400	1.18062e-07
153500	1.13577e-07
153600	1.07732e-07
153700	1.09807e-07
153800	1.07823e-07
153900	1.02792e-07
154000	1.18703e-07
154100	1.24232e-07
154200	1.14189e-07
154300	1.18531e-07
154400	1.14463e-07
154500	1.23054e-07
154600	1.20203e-07
154700	1.23558e-07
154800	1.08096e-07
154900	1.10701e-07
155000	1.23959e-07
155100	1.28942e-07
155200	1.20615e-07
155300	1.26833e-07
155400	1.26203e-07
155500	1.178e-07
155600	1.08947e-07
155700	1.20784e-07
155800	1.1066e-07
155900	1.15561e-07
156000	1.1077e-07
156100	1.12233e-07
156200	1.27404e-07
156300	1.16742e-07
156400	1.18788e-07
156500	1.2271e-07
156600	1.14165e-07
156700	1.09868e-07
156800	1.21758e-07
156900	1.23598e-07
157000	1.13321e-07
157100	1.11924e-07
157200	1.14643e-07
157300	1.19674e-07
157400	1.17664e-07
157500	1.08411e-07
157600	1.1329e-07
157700	1.15078e-07
157800	1.19915e-07
157900	1.19794e-07
158000	1.14545e-07
158100	1.18198e-07
158200	1.21812e-07
158300	1.1315e-07
158400	1.09608e-07
158500	1.1612e-07
158600	1.22997e-07
158700	1.13951e-07
158800	1.13053e-07
158900	1.14466e-07
159000	1.16181e-07
159100	1.12398e-07
159200	1.13019e-07
159300	1.12754e-07
159400	1.14696e-07
159500	1.22374e-07
159600	1.13359e-07
159700	1.05008e-07
159800	1.20872e-07
159900	1.28465e-07
160000	1.19252e-07
160100	1.1133e-07
160200	1.13468e-07
160300	1.02705e-07
160400	1.09611e-07
160500	1.05209e-07
160600	1.04793e-07
160700	1.11321e-07
160800	1.18177e-07
160900	1.17324e-07
161000	1.14366e-07
161100	1.13984e-07
161200	1.07619e-07
161300	1.14828e-07
161400	1.04554e-07
161500	1.03959e-07
161600	1.06152e-07
161700	1.17886e-07
161800	1.21399e-07
161900	1.23605e-07
162000	1.25191e-07
162100	1.213e-07
162200	1.2151e-07
162300	1.16812e-07
162400	1.15247e-07
162500	1.1016e-07
162600	1.09218e-07
162700	1.13009e-07
162800	1.15988e-07
162900	1.21423e-07
163000	1.21826e-07
163100	1.20677e-07
163200	1.17638e-07
163300	1.07568e-07
163400	1.09131e-07
163500	1.19121e-07
163600	1.13165e-07
163700	1.09389e-07
163800	1.21975e-07
163900	1.17718e-07
164000	1.08026e-07
164100	1.09955e-07
164200	1.05577e-07
164300	1.11613e-07
164400	1.18197e-07
164500	1.1834e-07
164600	1.05236e-07
164700	1.20944e-07
164800	1.28866e-07
164900	1.16824e-07
165000	1.20709e-07
165100	1.17887e-07
165200	1.09182e-07
165300	1.03036e-07
165400	1.0406e-07
165500	1.11807e-07
165600	1.02663e-07
165700	1.03701e-07
165800	1.02629e-07
165900	1.21184e-07
166000	1.11922e-07
166100	1.13524e-07
166200	1.18826e-07
166300	1.25401e-07
166400	1.10643e-07
166500	1.16439e-07
166600	1.16141e-07
166700	1.24558e-07
166800	1.32775e-07
166900	1.55863e-07
167000	1.72377e-07
167100	1.61925e-07
167200	1.37752e-07
167300	1.18958e-07
167400	1.25914e-07
167500	1.32372e-07
167600	1.30197e-07
167700	1.19195e-07
167800	1.38295e-07
167900	1.49534e-07
168000	1.31416e-07
168100	1.27662e-07
168200	1.18879e-07
168300	1.2168e-07
168400	1.38751e-07
168500	1.34932e-07
168600	1.40516e-07
168700	1.33233e-07
168800	1.45308e-07
168900	1.67891e-07
169000	1.72926e-07
169100	2.14024e-07
169200	1.97865e-07
169300	1.78453e-07
169400	2.43863e-07
169500	2.08227e-07
169600	1.5759e-07
169700	1.34863e-07
169800	1.3976e-07
169900	1.36384e-07
170000	1.35581e-07
170100	1.40954e-07
170200	1.21393e-07
170300	1.39971e-07
170400	1.26947e-07
170500	1.20068e-07
170600	1.56938e-07
170700	1.53123e-07
170800	1.3717e-07
170900	1.30213e-07
171000	1.20334e-07
171100	1.1824e-07
171200	1.15635e-07
171300	1.22704e-07
171400	1.06972e-07
171500	1.01698e-07
171600	1.1181e-07
171700	1.08076e-07
171800	1.07552e-07
171900	1.1695e-07
172000	1.12645e-07
172100	1.1306e-07
172200	1.19007e-07
172300	1.14342e-07
172400	1.08283e-07
172500	1.05569e-07
172600	1.06301e-07
172700	1.04183e-07
172800	1.15901e-07
172900	1.2737e-07
173000	1.26572e-07
173100	1.23091e-07
173200	1.1038e-07
173300	1.10161e-07
173400	1.06037e-07
173500	1.14434e-07
173600	1.09588e-07
173700	1.12297e-07
173800	1.12413e-07
173900	1.20497e-07
174000	1.12291e-07
174100	1.13211e-07
174200	1.1419e-07
174300	1.17097e-07
174400	1.20899e-07
174500	1.23535e-07
174600	1.20177e-07
174700	1.19918e-07
174800	1.28e-07
174900	1.25945e-07
175000	1.13972e-07
175100	1.15396e-07
175200	1.11617e-07
175300	1.06797e-07
175400	1.2103e-07
175500	1.17643e-07
175600	1.06939e-07
175700	1.10805e-07
175800	1.16968e-07
175900	1.09964e-07
176000	1.19926e-07
176100	1.12933e-07
176200	1.09826e-07
176300	1.1919e-07
176400	1.07257e-07
176500	1.13051e-07
176600	1.23303e-07
176700	1.16385e-07
176800	1.0599e-07
176900	1.05771e-07
177000	1.0376e-07
177100	1.15907e-07
177200	1.14778e-07
177300	1.05681e-07
177400	1.17001e-07
177500	1.18672e-07
177600	1.16351e-07
177700	1.11993e-07
177800	1.18545e-07
177900	1.12336e-07
178000	1.16408e-07
178100	1.15243e-07
178200	1.07137e-07
178300	9.88348e-08
178400	1.15189e-07
178500	1.19339e-07
178600	1.08268e-07
178700	1.156e-07
178800	1.13224e-07
178900	1.13516e-07
179000	1.18941e-07
179100	1.14205e-07
179200	1.16475e-07
179300	1.09953e-07
179400	1.17091e-07
179500	1.2262e-07
179600	1.87449e-07
179700	2.49503e-06
179800	2.99436e-06
179900	2.70012e-07
180000	1.29936e-07
180100	1.21006e-07
180200	1.18083e-07
180300	1.11107e-07
180400	1.07612e-07
180500	1.20573e-07
180600	1.23227e-07
180700	1.12622e-07
180800	1.04164e-07
180900	1.10147e-07
181000	1.13684e-07
181100	1.16008e-07
181200	1.13207e-07
181300	1.12819e-07
181400	1.13812e-07
181500	1.13577e-07
181600	1.09394e-07
181700	1.11471e-07
181800	1.19963e-07
181900	1.02745e-07
182000	1.04402e-07
182100	1.06191e-07
182200	1.02238e-07
182300	1.08231e-07
182400	1.12375e-07
182500	1.1467e-07
182600	1.1757e-07
182700	1.14669e-07
182800	1.10653e-07
182900	1.14479e-07
183000	1.16567e-07
183100	1.04095e-07
183200	1.06617e-07
183300	1.14109e-07
183400	1.19383e-07
183500	1.07937e-07
183600	1.04126e-07
183700	1.05307e-07
183800	1.09842e-07
183900	1.09037e-07
184000	1.14164e-07
184100	1.14722e-07
184200	1.24762e-07
184300	1.27295e-07
184400	1.3014e-07
184500	1.17788e-07
184600	1.11798e-07
184700	1.1255e-07
184800	1.03458e-07
184900	1.12601e-07
185000	1.4816e-07
185100	1.8539e-07
185200	1.30462e-07
185300	1.23971e-07
185400	1.12609e-07
185500	9.81977e-08
185600	1.14496e-07
185700	1.26337e-07
185800	1.19971e-07
185900	1.16804e-07
186000	1.05369e-07
186100	1.00646e-07
186200	1.08744e-07
186300	1.22663e-07
186400	1.14221e-07
186500	1.12743e-07
186600	1.13753e-07
186700	1.13414e-07
186800	1.09878e-07
186900	1.02522e-07
187000	1.17449e-07
187100	1.11754e-07
187200	1.03573e-07
187300	1.01164e-07
187400	1.12295e-07
187500	1.1945e-07
187600	1.09474e-07
187700	1.09111e-07
187800	1.00416e-07
187900	1.00244e-07
188000	1.08549e-07
188100	1.11764e-07
188200	1.15809e-07
188300	1.15118e-07
188400	1.11179e-07
188500	1.13268e-07
188600	1.12408e-07
188700	1.15914e-07
188800	1.10023e-07
188900	1.05709e-07
189000	1.1431e-07
189100	1.06601e-07
189200	1.07232e-07
189300	1.14503e-07
189400	1.22162e-07
189500	1.18269e-07
189600	1.09185e-07
189700	1.04403e-07
189800	1.17365e-07
189900	1.20612e-07
190000	1.02553e-07
190100	1.13067e-07
190200	1.17992e-07
190300	1.06876e-07
190400	1.04092e-07
190500	1.11611e-07
190600	1.08547e-07
190700	1.08263e-07
190800	1.11335e-07
190900	1.18852e-07
191000	1.20777e-07
191100	1.15951e-07
191200	1.22793e-07
191300	1.14383e-07
191400	1.09118e-07
191500	1.11247e-07
191600	1.05038e-07
191700	1.14536e-07
191800	1.10286e-07
191900	1.06079e-07
192000	1.05307e-07
192100	1.05918e-07
192200	1.08138e-07
192300	1.18208e-07
192400	1.05518e-07
192500	1.01777e-07
192600	1.042e-07
192700	1.08509e-07
192800	1.08447e-07
192900	1.06844e-07
193000	1.1409e-07
193100	1.07166e-07
193200	1.11272e-07
193300	1.0884e-07
193400	1.19538e-07
193500	1.26154e-07
193600	1.14666e-07
193700	1.1363e-07
193800	1.11687e-07
193900	1.09967e-07
194000	1.13491e-07
194100	1.07898e-07
194200	1.09138e-07
194300	1.09234e-07
194400	1.03591e-07
194500	1.1434e-07
194600	1.07599e-07
194700	9.96507e-08
194800	9.70498e-08
194900	1.07671e-07
195000	1.14916e-07
195100	1.09283e-07
195200	1.17271e-07
195300	1.16783e-07
195400	1.15005e-07
195500	1.28234e-07
195600	1.2439e-07
195700	1.15876e-07
195800	1.12242e-07
195900	1.00931e-07
196000	1.05275e-07
196100	1.02954e-07
196200	1.06516e-07
196300	1.09971e-07
196400	1.10458e-07
196500	1.09525e-07
196600	1.10554e-07
196700	1.06068e-07
196800	1.09969e-07
196900	1.09637e-07
197000	1.10526e-07
197100	1.04067e-07
197200	1.11059e-07
197300	1.24453e-07
197400	1.20309e-07
197500	1.13228e-07
197600	1.08851e-07
197700	1.11051e-07
197800	1.09788e-07
197900	1.20191e-07
198000	1.16887e-07
198100	1.0757e-07
198200	1.08608e-07
198300	1.07888e-07
198400	1.11755e-07
198500	1.11134e-07
198600	1.02299e-07
198700	1.09527e-07
198800	1.11611e-07
198900	1.16953e-07
199000	1.19887e-07
199100	1.11427e-07
199200	1.02896e-07
199300	1.05188e-07
199400	1.10469e-07
199500	1.09556e-07
199600	1.13241e-07
199700	1.1383e-07
[truncated: 1,002 more rows]

## Sheet: Sheet4
300K_24S
Freq(Hz)	Sv (arb.)
0	9.49757e-07
100	1.02853e-06
200	8.86254e-07
300	2.42988e-07
400	2.33438e-07
500	1.98322e-07
600	1.82654e-07
700	1.61091e-07
800	1.30963e-07
900	1.31935e-07
1000	1.278e-07
1100	1.30651e-07
1200	1.3119e-07
1300	1.284e-07
1400	1.26136e-07
1500	1.17018e-07
1600	1.22726e-07
1700	1.37726e-07
1800	1.21062e-07
1900	1.21126e-07
2000	1.25105e-07
2100	1.20176e-07
2200	1.11254e-07
2300	1.10343e-07
2400	1.22729e-07
2500	1.29687e-07
2600	1.26574e-07
2700	1.2014e-07
2800	1.22547e-07
2900	1.27227e-07
3000	1.28856e-07
3100	1.22096e-07
3200	1.20547e-07
3300	1.22032e-07
3400	1.33664e-07
3500	1.27407e-07
3600	1.22878e-07
3700	1.15069e-07
3800	1.16573e-07
3900	1.21318e-07
4000	1.2237e-07
4100	1.26514e-07
4200	1.24706e-07
4300	1.26897e-07
4400	1.27955e-07
4500	1.18768e-07
4600	1.2168e-07
4700	1.15847e-07
4800	1.18149e-07
4900	1.26057e-07
5000	1.212e-07
5100	1.20281e-07
5200	1.25e-07
5300	1.19976e-07
5400	1.19151e-07
5500	1.17455e-07
5600	1.14886e-07
5700	1.16889e-07
5800	1.15228e-07
5900	1.16698e-07
6000	1.12213e-07
6100	1.1255e-07
6200	1.05741e-07
6300	1.10797e-07
6400	1.18674e-07
6500	1.22522e-07
6600	1.15312e-07
6700	1.17937e-07
6800	1.23153e-07
6900	1.19558e-07
7000	1.2778e-07
7100	1.24324e-07
7200	1.16322e-07
7300	1.14224e-07
7400	1.12868e-07
7500	1.17906e-07
7600	1.17215e-07
7700	1.20304e-07
7800	1.14503e-07
7900	1.13273e-07
8000	1.16217e-07
8100	1.16897e-07
8200	1.15429e-07
8300	1.12525e-07
8400	1.19593e-07
8500	1.1057e-07
8600	1.08588e-07
8700	1.15774e-07
8800	1.1326e-07
8900	1.20803e-07
9000	1.11232e-07
9100	1.14065e-07
9200	1.23453e-07
9300	1.20987e-07
9400	1.20259e-07
9500	1.20132e-07
9600	1.09149e-07
9700	1.15008e-07
9800	1.10125e-07
9900	1.12968e-07
10000	1.09621e-07
10100	1.10916e-07
10200	1.15517e-07
10300	1.21337e-07
10400	1.16174e-07
10500	1.18626e-07
10600	1.18783e-07
10700	1.13174e-07
10800	1.13834e-07
10900	1.18356e-07
11000	1.17737e-07
11100	1.21859e-07
11200	1.18856e-07
11300	1.16555e-07
11400	1.24775e-07
11500	1.16473e-07
11600	1.10884e-07
11700	1.13007e-07
11800	1.16115e-07
11900	1.22331e-07
12000	1.11473e-07
12100	1.0908e-07
12200	1.14095e-07
12300	1.20723e-07
12400	1.23676e-07
12500	1.2275e-07
12600	1.21098e-07
12700	1.15056e-07
12800	1.20077e-07
12900	1.15148e-07
13000	1.11054e-07
13100	1.21235e-07
13200	1.21841e-07
13300	1.18086e-07
13400	1.11275e-07
13500	1.0951e-07
13600	1.15706e-07
13700	1.17702e-07
13800	1.20594e-07
13900	1.13047e-07
14000	1.10929e-07
14100	1.14115e-07
14200	1.14423e-07
14300	1.19959e-07
14400	1.13062e-07
14500	1.14332e-07
14600	1.2408e-07
14700	1.25966e-07
14800	1.23698e-07
14900	1.18417e-07
15000	1.20857e-07
15100	1.14816e-07
15200	1.11278e-07
15300	1.16759e-07
15400	1.15457e-07
15500	1.11736e-07
15600	1.16867e-07
15700	1.17469e-07
15800	1.12828e-07
15900	1.23917e-07
16000	1.25459e-07
16100	1.17192e-07
16200	1.11993e-07
16300	1.15829e-07
16400	1.13387e-07
16500	1.19037e-07
16600	1.15843e-07
16700	1.17119e-07
16800	1.23042e-07
16900	1.11153e-07
17000	1.07666e-07
17100	1.13656e-07
17200	1.11769e-07
17300	1.19894e-07
17400	1.22048e-07
17500	1.22585e-07
17600	1.18887e-07
17700	1.12351e-07
17800	1.15154e-07
17900	1.15449e-07
18000	1.15989e-07
18100	1.18423e-07
18200	1.2101e-07
18300	1.20552e-07
18400	1.24295e-07
18500	1.20623e-07
18600	1.19268e-07
18700	1.1976e-07
18800	1.19015e-07
18900	1.25952e-07
19000	1.25078e-07
19100	1.26912e-07
19200	1.1876e-07
19300	1.2527e-07
19400	1.19413e-07
19500	1.12355e-07
19600	1.24749e-07
19700	1.23741e-07
19800	1.16595e-07
19900	1.1443e-07
20000	1.13072e-07
20100	1.13144e-07
20200	1.19947e-07
20300	1.18049e-07
20400	1.18019e-07
20500	1.16413e-07
20600	1.1909e-07
20700	1.20111e-07
20800	1.16968e-07
20900	1.18656e-07
21000	1.19602e-07
21100	1.22927e-07
21200	1.27006e-07
21300	1.15476e-07
21400	1.08438e-07
21500	1.13193e-07
21600	1.1472e-07
21700	1.18891e-07
21800	1.20099e-07
21900	1.19379e-07
22000	1.23296e-07
22100	1.26547e-07
22200	1.25311e-07
22300	1.18826e-07
22400	1.12622e-07
22500	1.15586e-07
22600	1.19382e-07
22700	1.14066e-07
22800	1.12934e-07
22900	1.19047e-07
23000	1.20203e-07
23100	1.18025e-07
23200	1.17377e-07
23300	1.23018e-07
23400	1.22254e-07
23500	1.18888e-07
23600	1.23113e-07
23700	1.21567e-07
23800	1.11253e-07
23900	1.11362e-07
24000	1.12681e-07
24100	1.127e-07
24200	1.15347e-07
24300	1.16447e-07
24400	1.22744e-07
24500	1.19969e-07
24600	1.18752e-07
24700	1.19735e-07
24800	1.21069e-07
24900	1.18822e-07
25000	1.22862e-07
25100	1.23882e-07
25200	1.24172e-07
25300	1.1617e-07
25400	1.05329e-07
25500	1.08599e-07
25600	1.17136e-07
25700	1.17525e-07
25800	1.18963e-07
25900	1.31425e-07
26000	1.34398e-07
26100	1.27682e-07
26200	1.17891e-07
26300	1.21517e-07
26400	1.23057e-07
26500	1.17976e-07
26600	1.18995e-07
26700	1.1875e-07
26800	1.22286e-07
26900	1.28084e-07
27000	1.22803e-07
27100	1.15971e-07
27200	1.15436e-07
27300	1.20508e-07
27400	1.0965e-07
27500	1.08925e-07
27600	1.10359e-07
27700	1.11565e-07
27800	1.16582e-07
27900	1.25487e-07
28000	1.23832e-07
28100	1.19743e-07
28200	1.20285e-07
28300	1.23777e-07
28400	1.15653e-07
28500	1.16608e-07
28600	1.28272e-07
28700	1.1703e-07
28800	1.15119e-07
28900	1.23982e-07
29000	1.29176e-07
29100	1.21028e-07
29200	1.25173e-07
29300	1.19191e-07
29400	1.20833e-07
29500	1.25208e-07
29600	1.21786e-07
29700	1.14582e-07
29800	1.13063e-07
29900	1.12834e-07
30000	1.19139e-07
30100	1.17314e-07
30200	1.11678e-07
30300	1.08628e-07
30400	1.1399e-07
30500	1.18039e-07
30600	1.30282e-07
30700	1.26153e-07
30800	1.21835e-07
30900	1.18668e-07
31000	1.19105e-07
31100	1.10524e-07
31200	1.15088e-07
31300	1.14521e-07
31400	1.15541e-07
31500	1.2077e-07
31600	1.19365e-07
31700	1.14332e-07
31800	1.23057e-07
31900	1.18551e-07
32000	1.23309e-07
32100	1.259e-07
32200	1.18186e-07
32300	1.2237e-07
32400	1.15262e-07
32500	1.18821e-07
32600	1.25116e-07
32700	1.18783e-07
32800	1.12932e-07
32900	1.15777e-07
33000	1.19637e-07
33100	1.15871e-07
33200	1.05507e-07
33300	1.12222e-07
33400	1.12918e-07
33500	1.15205e-07
33600	1.18625e-07
33700	1.30504e-07
33800	1.24125e-07
33900	1.08074e-07
34000	1.15704e-07
34100	1.23219e-07
34200	1.2274e-07
34300	1.29998e-07
34400	1.179e-07
34500	1.15229e-07
34600	1.12576e-07
34700	1.18724e-07
34800	1.20253e-07
34900	1.22099e-07
35000	1.17344e-07
35100	1.2387e-07
35200	1.21852e-07
35300	1.18353e-07
35400	1.23382e-07
35500	1.21922e-07
35600	1.27143e-07
35700	1.20473e-07
35800	1.19308e-07
35900	1.27197e-07
36000	1.28843e-07
36100	1.18831e-07
36200	1.11515e-07
36300	1.14965e-07
36400	1.17332e-07
36500	1.13899e-07
36600	1.19919e-07
36700	1.13057e-07
36800	1.24888e-07
36900	2.24754e-06
37000	1.43578e-05
37100	5.89381e-06
37200	1.42357e-07
37300	1.27852e-07
37400	1.2401e-07
37500	1.16651e-07
37600	1.20259e-07
37700	1.22494e-07
37800	1.16672e-07
37900	1.1893e-07
38000	1.20281e-07
38100	1.19933e-07
38200	1.20438e-07
38300	1.15997e-07
38400	1.27573e-07
38500	1.25443e-07
38600	1.23835e-07
38700	1.14437e-07
38800	1.16236e-07
38900	1.18404e-07
39000	1.14651e-07
39100	1.15793e-07
39200	1.14006e-07
39300	1.15336e-07
39400	1.1451e-07
39500	1.16811e-07
39600	1.2045e-07
39700	1.19428e-07
39800	1.16222e-07
39900	1.14295e-07
40000	1.13897e-07
40100	1.25796e-07
40200	1.14837e-07
40300	1.23917e-07
40400	1.22289e-07
40500	1.17866e-07
40600	1.19251e-07
40700	1.18458e-07
40800	1.15589e-07
40900	1.16812e-07
41000	1.27114e-07
41100	1.28673e-07
41200	1.18943e-07
41300	1.25967e-07
41400	1.58939e-07
41500	3.49517e-07
41600	1.12001e-06
41700	3.16594e-06
41800	6.24854e-06
41900	6.62761e-06
42000	3.43621e-06
42100	6.94514e-06
42200	1.10545e-05
42300	2.63597e-05
42400	1.71474e-05
42500	8.90389e-06
42600	1.34253e-05
42700	7.76227e-06
42800	1.83242e-06
42900	3.49322e-07
43000	1.45372e-07
43100	1.29091e-07
43200	1.22809e-07
43300	1.97479e-07
43400	3.1205e-07
43500	1.52939e-07
43600	1.1886e-07
43700	1.1894e-07
43800	1.2117e-07
43900	1.2185e-07
44000	1.14882e-07
44100	1.21627e-07
44200	1.64595e-07
44300	1.35279e-07
44400	1.2165e-07
44500	1.24194e-07
44600	1.21088e-07
44700	1.14111e-07
44800	1.20152e-07
44900	2.32533e-07
45000	2.80599e-07
45100	1.37067e-07
45200	1.10364e-07
45300	1.15056e-07
45400	1.17437e-07
45500	1.21076e-07
45600	1.18068e-07
45700	1.20693e-07
45800	1.24742e-07
45900	1.16703e-07
46000	1.2095e-07
46100	1.24618e-07
46200	1.23312e-07
46300	1.16339e-07
46400	1.23373e-07
46500	1.29974e-07
46600	1.20086e-07
46700	1.20562e-07
46800	1.27002e-07
46900	1.16388e-07
47000	1.18544e-07
47100	1.23365e-07
47200	1.21982e-07
47300	1.18447e-07
47400	1.14259e-07
47500	1.19806e-07
47600	1.1539e-07
47700	1.19499e-07
47800	1.18243e-07
47900	1.18691e-07
48000	1.12379e-07
48100	1.09238e-07
48200	1.24522e-07
48300	1.23396e-07
48400	1.16038e-07
48500	1.21794e-07
48600	1.19642e-07
48700	1.1715e-07
48800	1.12774e-07
48900	1.19893e-07
49000	1.1746e-07
49100	1.21447e-07
49200	1.22258e-07
49300	1.216e-07
49400	1.21698e-07
49500	1.17668e-07
49600	1.18364e-07
49700	1.20175e-07
49800	1.14698e-07
49900	1.23905e-07
50000	1.24618e-07
50100	1.2777e-07
50200	1.3438e-07
50300	1.26594e-07
50400	1.2794e-07
50500	1.35282e-07
50600	1.27726e-07
50700	1.28463e-07
50800	1.3257e-07
50900	1.30206e-07
51000	1.25353e-07
51100	1.24233e-07
51200	1.31382e-07
51300	1.34545e-07
51400	1.33797e-07
51500	1.27013e-07
51600	1.2173e-07
51700	1.33619e-07
51800	1.34962e-07
51900	1.24807e-07
52000	1.24723e-07
52100	1.14189e-07
52200	1.15286e-07
52300	1.15836e-07
52400	1.10122e-07
52500	1.14909e-07
52600	1.18808e-07
52700	1.22041e-07
52800	1.27411e-07
52900	1.26512e-07
53000	1.20204e-07
53100	1.16249e-07
53200	1.15479e-07
53300	1.22994e-07
53400	1.25555e-07
53500	1.18157e-07
53600	1.13921e-07
53700	1.14994e-07
53800	1.2818e-07
53900	1.26117e-07
54000	1.25085e-07
54100	1.2009e-07
54200	1.1487e-07
54300	1.18862e-07
54400	1.15064e-07
54500	1.26523e-07
54600	1.3377e-07
54700	1.22384e-07
54800	1.17758e-07
54900	1.2189e-07
55000	1.2195e-07
55100	1.16176e-07
55200	1.08322e-07
55300	1.11174e-07
55400	1.15416e-07
55500	1.14807e-07
55600	1.15747e-07
55700	1.20847e-07
55800	1.1904e-07
55900	1.21754e-07
56000	1.17861e-07
56100	1.22058e-07
56200	1.21712e-07
56300	1.1932e-07
56400	1.17488e-07
56500	1.22386e-07
56600	1.21149e-07
56700	1.17886e-07
56800	1.20522e-07
56900	1.17787e-07
57000	1.2252e-07
57100	1.2881e-07
57200	1.27288e-07
57300	1.31516e-07
57400	1.19078e-07
57500	1.17833e-07
57600	1.24356e-07
57700	1.20502e-07
57800	1.21059e-07
57900	1.20801e-07
58000	1.16466e-07
58100	1.12827e-07
58200	1.22737e-07
58300	1.14844e-07
58400	1.18138e-07
58500	1.28072e-07
58600	1.26028e-07
58700	1.11138e-07
58800	1.12473e-07
58900	1.20517e-07
59000	1.22271e-07
59100	1.24275e-07
59200	1.19829e-07
59300	1.26546e-07
59400	1.25202e-07
59500	1.19802e-07
59600	1.08918e-07
59700	1.26741e-07
59800	4.75e-06
59900	3.41527e-05
60000	1.49871e-05
60100	2.06315e-07
60200	1.24068e-07
60300	1.20751e-07
60400	1.2508e-07
60500	1.17693e-07
60600	1.08984e-07
60700	1.13271e-07
60800	1.24196e-07
60900	1.22659e-07
61000	1.15524e-07
61100	1.12079e-07
61200	1.1117e-07
61300	1.22744e-07
61400	1.27923e-07
61500	1.28923e-07
61600	1.20267e-07
61700	1.15468e-07
61800	1.20532e-07
61900	1.20663e-07
62000	1.18612e-07
62100	1.1637e-07
62200	1.10923e-07
62300	1.20307e-07
62400	1.19508e-07
62500	1.28135e-07
62600	1.24769e-07
62700	1.17087e-07
62800	1.10298e-07
62900	1.17547e-07
63000	1.21367e-07
63100	1.0968e-07
63200	1.04841e-07
63300	1.14319e-07
63400	1.14605e-07
63500	1.1969e-07
63600	1.23939e-07
63700	1.21418e-07
63800	1.21719e-07
63900	1.20752e-07
64000	1.21128e-07
64100	1.23232e-07
64200	1.18527e-07
64300	1.19604e-07
64400	1.16827e-07
64500	1.21501e-07
64600	1.15945e-07
64700	1.1193e-07
64800	1.19977e-07
64900	1.27236e-07
65000	1.17046e-07
65100	1.20108e-07
65200	1.2105e-07
65300	1.21738e-07
65400	1.1823e-07
65500	1.13386e-07
65600	1.1675e-07
65700	1.19528e-07
65800	1.10229e-07
65900	1.10753e-07
66000	1.17249e-07
66100	1.16844e-07
66200	1.36052e-07
66300	1.29632e-07
66400	1.19328e-07
66500	1.3266e-07
66600	1.25984e-07
66700	1.21243e-07
66800	1.26923e-07
66900	1.32596e-07
67000	1.30949e-07
67100	1.61063e-07
67200	2.47858e-07
67300	2.13424e-07
67400	1.80816e-07
67500	1.36195e-07
67600	1.17984e-07
67700	1.23017e-07
67800	1.75632e-07
67900	2.36603e-07
68000	3.25811e-07
68100	4.56308e-07
68200	7.62708e-07
68300	4.75813e-06
68400	4.44102e-06
68500	2.18318e-06
68600	6.4895e-07
68700	3.23911e-07
68800	1.69581e-07
68900	1.62825e-07
69000	1.33499e-07
69100	1.22635e-07
69200	1.37657e-07
69300	1.28017e-07
69400	1.32942e-07
69500	1.28456e-07
69600	1.13392e-07
69700	1.15107e-07
69800	1.18104e-07
69900	1.20665e-07
70000	1.22972e-07
70100	1.26459e-07
70200	1.20537e-07
70300	1.24288e-07
70400	1.26274e-07
70500	1.19155e-07
70600	1.15242e-07
70700	1.18027e-07
70800	1.24509e-07
70900	1.19729e-07
71000	1.15364e-07
71100	1.17895e-07
71200	1.29177e-07
71300	1.15609e-07
71400	1.11243e-07
71500	1.1826e-07
71600	1.17343e-07
71700	1.14721e-07
71800	1.18971e-07
71900	1.25228e-07
72000	1.14323e-07
72100	1.2423e-07
72200	1.2042e-07
72300	1.10798e-07
72400	1.13721e-07
72500	1.14134e-07
72600	1.11431e-07
72700	1.15163e-07
72800	1.17897e-07
72900	1.22818e-07
73000	1.24551e-07
73100	1.1792e-07
73200	1.18807e-07
73300	1.27333e-07
73400	1.23646e-07
73500	1.14878e-07
73600	1.23628e-07
73700	1.17132e-07
73800	1.15042e-07
73900	3.38e-07
74000	2.69278e-06
74100	1.75007e-06
74200	1.45252e-07
74300	1.25382e-07
74400	1.20599e-07
74500	1.17251e-07
74600	1.28456e-07
74700	1.24874e-07
74800	1.13434e-07
74900	1.18795e-07
75000	1.15932e-07
75100	1.15211e-07
75200	1.23087e-07
75300	1.24661e-07
75400	1.17279e-07
75500	1.12864e-07
75600	1.19748e-07
75700	1.22604e-07
75800	1.18668e-07
75900	1.21913e-07
76000	1.16439e-07
76100	1.15732e-07
76200	1.13792e-07
76300	1.09117e-07
76400	1.13584e-07
76500	1.2199e-07
76600	1.21721e-07
76700	1.19333e-07
76800	1.26267e-07
76900	1.21163e-07
77000	1.21317e-07
77100	1.14141e-07
77200	1.13992e-07
77300	1.1999e-07
77400	1.10832e-07
77500	1.09666e-07
77600	1.16352e-07
77700	1.16701e-07
77800	1.1944e-07
77900	1.20385e-07
78000	1.17224e-07
78100	1.17908e-07
78200	1.24027e-07
78300	1.26988e-07
78400	1.2608e-07
78500	1.16062e-07
78600	1.13858e-07
78700	1.11011e-07
78800	1.14475e-07
78900	1.19529e-07
79000	1.22372e-07
79100	1.15115e-07
79200	1.18271e-07
79300	1.2168e-07
79400	1.15317e-07
79500	1.13581e-07
79600	1.20805e-07
79700	1.20072e-07
79800	1.18663e-07
79900	1.21734e-07
80000	1.14226e-07
80100	1.21507e-07
80200	1.28504e-07
80300	1.15045e-07
80400	1.19573e-07
80500	1.15349e-07
80600	1.19672e-07
80700	1.19948e-07
80800	1.25905e-07
80900	1.28676e-07
81000	1.22402e-07
81100	1.20645e-07
81200	1.20194e-07
81300	1.25724e-07
81400	1.22535e-07
81500	1.21463e-07
81600	1.21762e-07
81700	1.22298e-07
81800	1.18356e-07
81900	1.20199e-07
82000	1.09596e-07
82100	1.13581e-07
82200	1.2239e-07
82300	1.15119e-07
82400	1.14564e-07
82500	1.12734e-07
82600	1.2228e-07
82700	1.2212e-07
82800	1.14896e-07
82900	1.16262e-07
83000	1.23484e-07
83100	1.19128e-07
83200	1.25507e-07
83300	1.34603e-07
83400	1.47862e-07
83500	1.72516e-07
83600	1.93439e-07
83700	1.67967e-07
83800	1.29169e-07
83900	1.47663e-07
84000	1.58496e-07
84100	1.54125e-07
84200	1.73018e-07
84300	1.70152e-07
84400	1.9946e-07
84500	2.37644e-07
84600	3.07077e-07
84700	2.99685e-07
84800	2.14646e-07
84900	1.67708e-07
85000	1.70071e-07
85100	1.55862e-07
85200	1.8035e-07
85300	2.17632e-07
85400	1.72765e-07
85500	1.34202e-07
85600	1.29032e-07
85700	1.23068e-07
85800	1.21001e-07
85900	1.2233e-07
86000	1.22806e-07
86100	1.29024e-07
86200	1.312e-07
86300	1.17629e-07
86400	1.17363e-07
86500	1.13298e-07
86600	1.17585e-07
86700	1.23547e-07
86800	1.15074e-07
86900	1.2325e-07
87000	1.24838e-07
87100	1.23604e-07
87200	1.21018e-07
87300	1.21456e-07
87400	1.22332e-07
87500	1.25714e-07
87600	1.33562e-07
87700	1.20153e-07
87800	1.19484e-07
87900	1.12681e-07
88000	1.12034e-07
88100	1.09708e-07
88200	1.14829e-07
88300	1.25355e-07
88400	1.21568e-07
88500	1.23278e-07
88600	1.229e-07
88700	1.19335e-07
88800	1.18598e-07
88900	1.21819e-07
89000	1.19756e-07
89100	1.15997e-07
89200	1.20657e-07
89300	1.35631e-07
89400	1.34715e-07
89500	1.25833e-07
89600	1.18701e-07
89700	1.15383e-07
89800	1.15653e-07
89900	1.1776e-07
90000	1.12366e-07
90100	1.10671e-07
90200	1.26378e-07
90300	1.0731e-07
90400	1.16331e-07
90500	1.19521e-07
90600	1.17691e-07
90700	1.20742e-07
90800	1.18823e-07
90900	1.29743e-07
91000	1.27415e-07
91100	1.21739e-07
91200	1.19481e-07
91300	1.17717e-07
91400	1.11007e-07
91500	1.15933e-07
91600	1.13697e-07
91700	1.14577e-07
91800	1.18289e-07
91900	1.17523e-07
92000	1.13904e-07
92100	1.17743e-07
92200	1.17155e-07
92300	1.20452e-07
92400	1.16782e-07
92500	1.21707e-07
92600	1.17129e-07
92700	1.21635e-07
92800	1.18205e-07
92900	1.2247e-07
93000	1.23366e-07
93100	1.16672e-07
93200	1.19253e-07
93300	1.20792e-07
93400	1.16096e-07
93500	1.29381e-07
93600	1.15823e-07
93700	1.12115e-07
93800	1.16578e-07
93900	1.21013e-07
94000	1.22761e-07
94100	1.22205e-07
94200	1.23524e-07
94300	1.12321e-07
94400	1.03946e-07
94500	1.14895e-07
94600	1.17925e-07
94700	1.15497e-07
94800	1.1676e-07
94900	1.13987e-07
95000	1.08461e-07
95100	1.1749e-07
95200	1.16415e-07
95300	1.15869e-07
95400	1.22375e-07
95500	1.13388e-07
95600	1.11274e-07
95700	1.10591e-07
95800	1.19727e-07
95900	1.19826e-07
96000	1.11687e-07
96100	1.12859e-07
96200	1.19509e-07
96300	1.2529e-07
96400	1.25293e-07
96500	1.21807e-07
96600	1.12946e-07
96700	1.11127e-07
96800	1.1555e-07
96900	1.22354e-07
97000	1.13217e-07
97100	1.11719e-07
97200	1.20316e-07
97300	1.13629e-07
97400	1.11852e-07
97500	1.17938e-07
97600	1.21869e-07
97700	1.18375e-07
97800	1.13616e-07
97900	1.17626e-07
98000	1.25904e-07
98100	1.19137e-07
98200	1.18453e-07
98300	1.24496e-07
98400	1.23714e-07
98500	1.17091e-07
98600	1.2263e-07
98700	1.1625e-07
98800	1.14105e-07
98900	1.14916e-07
99000	1.14979e-07
99100	1.1131e-07
99200	1.1552e-07
99300	1.2014e-07
99400	1.22333e-07
99500	1.20416e-07
99600	1.25378e-07
99700	1.29309e-07
99800	1.22052e-07
99900	1.27671e-07
100000	1.22242e-07
100100	1.17431e-07
100200	1.17438e-07
100300	1.16992e-07
100400	1.13572e-07
100500	1.16229e-07
100600	1.1879e-07
100700	1.24927e-07
100800	1.23052e-07
100900	1.20359e-07
101000	1.25823e-07
101100	1.25032e-07
101200	1.27614e-07
101300	1.20753e-07
101400	1.19377e-07
101500	1.19048e-07
101600	1.224e-07
101700	1.25292e-07
101800	1.22094e-07
101900	1.21075e-07
102000	1.21458e-07
102100	1.20455e-07
102200	1.24921e-07
102300	1.19846e-07
102400	1.27794e-07
102500	1.18112e-07
102600	1.18295e-07
102700	1.28194e-07
102800	1.21139e-07
102900	1.18112e-07
103000	1.15127e-07
103100	1.15561e-07
103200	1.21467e-07
103300	1.242e-07
103400	1.22115e-07
103500	1.1991e-07
103600	1.17298e-07
103700	1.13655e-07
103800	1.14957e-07
103900	1.09888e-07
104000	1.20145e-07
104100	1.22097e-07
104200	1.23568e-07
104300	1.27008e-07
104400	1.26526e-07
104500	1.18125e-07
104600	1.18383e-07
104700	1.23179e-07
104800	1.16202e-07
104900	1.08592e-07
105000	1.1663e-07
105100	1.21181e-07
105200	1.18353e-07
105300	1.27657e-07
105400	1.23409e-07
105500	1.11554e-07
105600	1.10738e-07
105700	1.17763e-07
105800	1.16623e-07
105900	1.16365e-07
106000	1.12304e-07
106100	1.19061e-07
106200	1.16093e-07
106300	1.0632e-07
106400	1.08709e-07
106500	1.14456e-07
106600	1.13173e-07
106700	1.18431e-07
106800	1.22517e-07
106900	1.20291e-07
107000	1.16912e-07
107100	1.17161e-07
107200	1.12148e-07
107300	1.08067e-07
107400	1.13645e-07
107500	1.20484e-07
107600	1.22918e-07
107700	1.22655e-07
107800	1.18231e-07
107900	1.25924e-07
108000	1.22885e-07
108100	1.17163e-07
108200	1.20496e-07
108300	1.21402e-07
108400	1.26681e-07
108500	1.27079e-07
108600	1.2858e-07
108700	1.18771e-07
108800	1.16919e-07
108900	1.18816e-07
109000	1.26823e-07
109100	1.18801e-07
109200	1.17747e-07
109300	1.17021e-07
109400	1.20659e-07
109500	1.19334e-07
109600	1.1401e-07
109700	1.18759e-07
109800	1.22809e-07
109900	1.18381e-07
110000	1.2216e-07
110100	1.21401e-07
110200	1.23504e-07
110300	1.2052e-07
110400	1.13494e-07
110500	1.07592e-07
110600	1.17344e-07
110700	1.24559e-07
110800	1.13042e-07
110900	1.515e-07
111000	9.5407e-07
111100	9.28925e-07
111200	1.52117e-07
111300	1.17587e-07
111400	1.26766e-07
111500	1.17386e-07
111600	1.1591e-07
111700	1.21444e-07
111800	1.1553e-07
111900	1.13586e-07
112000	1.12079e-07
112100	1.14404e-07
112200	1.17886e-07
112300	1.15774e-07
112400	1.15745e-07
112500	1.12642e-07
112600	1.11931e-07
112700	1.19445e-07
112800	1.2129e-07
112900	1.17794e-07
113000	1.12287e-07
113100	1.17382e-07
113200	1.20434e-07
113300	1.16671e-07
113400	1.1771e-07
113500	1.16447e-07
113600	1.10744e-07
113700	1.11635e-07
113800	1.26399e-07
113900	1.23897e-07
114000	1.16739e-07
114100	1.17571e-07
114200	1.19562e-07
114300	1.24348e-07
114400	1.1412e-07
114500	1.13491e-07
114600	1.26929e-07
114700	1.1688e-07
114800	1.16462e-07
114900	1.2025e-07
115000	1.18978e-07
115100	1.24938e-07
115200	1.2733e-07
115300	1.14662e-07
115400	1.10135e-07
115500	1.21356e-07
115600	1.13541e-07
115700	1.11004e-07
115800	1.12886e-07
115900	1.15736e-07
116000	1.14696e-07
116100	1.15582e-07
116200	1.16171e-07
116300	1.14298e-07
116400	1.1977e-07
116500	1.20317e-07
116600	1.15097e-07
116700	1.16899e-07
116800	1.19862e-07
116900	1.18998e-07
117000	1.22526e-07
117100	1.17878e-07
117200	1.12091e-07
117300	1.1391e-07
117400	1.21638e-07
117500	1.12664e-07
117600	1.11898e-07
117700	1.11328e-07
117800	1.06978e-07
117900	1.0777e-07
118000	1.20096e-07
118100	1.2819e-07
118200	1.15296e-07
118300	1.17473e-07
118400	1.20193e-07
118500	1.19727e-07
118600	1.12985e-07
118700	1.08621e-07
118800	1.15025e-07
118900	1.14706e-07
119000	1.07421e-07
119100	1.14793e-07
119200	1.20206e-07
119300	1.24532e-07
119400	1.15108e-07
119500	1.09602e-07
119600	1.17173e-07
119700	1.23639e-07
119800	2.10193e-07
119900	1.82538e-07
120000	1.12424e-07
120100	1.14081e-07
120200	1.19075e-07
120300	1.19446e-07
120400	1.12398e-07
120500	1.10484e-07
120600	1.22979e-07
120700	1.27028e-07
120800	1.23096e-07
120900	1.22349e-07
121000	1.17565e-07
121100	1.15539e-07
121200	1.08817e-07
121300	1.1259e-07
121400	1.17017e-07
121500	1.15942e-07
121600	1.20635e-07
121700	1.16744e-07
121800	1.16085e-07
121900	1.17339e-07
122000	1.18066e-07
122100	1.10735e-07
122200	1.18673e-07
122300	1.22329e-07
122400	1.12844e-07
122500	1.09862e-07
122600	1.17493e-07
122700	1.15965e-07
122800	1.11165e-07
122900	1.11877e-07
123000	1.13886e-07
123100	1.13325e-07
123200	1.21322e-07
123300	1.186e-07
123400	1.15441e-07
123500	1.14941e-07
123600	1.27602e-07
123700	1.23188e-07
123800	1.236e-07
123900	1.18837e-07
124000	1.22923e-07
124100	1.1806e-07
124200	1.15245e-07
124300	1.19281e-07
124400	1.18098e-07
124500	1.25206e-07
124600	1.23613e-07
124700	1.34797e-07
124800	1.38931e-07
124900	1.84574e-07
125000	2.58395e-07
125100	4.21947e-07
125200	6.59513e-07
125300	8.42642e-07
125400	7.4858e-07
125500	3.91852e-07
125600	2.1352e-07
125700	4.8833e-07
125800	6.32315e-07
125900	3.63221e-07
126000	4.78965e-07
126100	6.31426e-07
126200	4.21478e-07
126300	6.35376e-07
126400	5.47696e-07
126500	7.61056e-07
126600	8.83796e-07
126700	1.36535e-06
126800	2.24412e-06
126900	2.18578e-06
127000	2.6377e-06
127100	2.71153e-06
127200	1.33624e-06
127300	8.02029e-07
127400	7.6651e-07
127500	8.01778e-07
127600	8.00625e-07
127700	8.95375e-07
127800	7.10794e-07
127900	1.46117e-06
128000	1.62203e-06
128100	1.00293e-06
128200	4.58299e-07
128300	2.06386e-07
128400	1.35141e-07
128500	1.22363e-07
128600	1.17578e-07
128700	1.13617e-07
128800	1.18697e-07
128900	1.15473e-07
129000	1.14658e-07
129100	1.10433e-07
129200	1.15229e-07
129300	1.21556e-07
129400	1.14467e-07
129500	1.15348e-07
129600	1.22314e-07
129700	1.2311e-07
129800	1.21037e-07
129900	1.16664e-07
130000	1.15073e-07
130100	1.19557e-07
130200	1.22215e-07
130300	1.20721e-07
130400	1.24356e-07
130500	1.24067e-07
130600	1.18094e-07
130700	1.20562e-07
130800	1.10256e-07
130900	1.07221e-07
131000	1.07054e-07
131100	1.12497e-07
131200	1.14749e-07
131300	1.06572e-07
131400	1.09446e-07
131500	1.07153e-07
131600	1.09303e-07
131700	1.13149e-07
131800	1.09642e-07
131900	1.16314e-07
132000	1.17858e-07
132100	1.11451e-07
132200	1.10317e-07
132300	1.08687e-07
132400	1.11638e-07
132500	1.13408e-07
132600	1.15939e-07
132700	1.19519e-07
132800	1.13398e-07
132900	1.15527e-07
133000	1.13786e-07
133100	1.06721e-07
133200	1.1166e-07
133300	1.17077e-07
133400	1.22956e-07
133500	1.09868e-07
133600	1.01761e-07
133700	1.14398e-07
133800	1.17495e-07
133900	1.16671e-07
134000	1.16989e-07
134100	1.17005e-07
134200	1.1434e-07
134300	1.04205e-07
134400	1.2098e-07
134500	1.25695e-07
134600	1.22019e-07
134700	1.18112e-07
134800	1.17638e-07
134900	1.15926e-07
135000	1.12419e-07
135100	1.15517e-07
135200	1.1864e-07
135300	1.13488e-07
135400	1.10147e-07
135500	1.1364e-07
135600	1.10341e-07
135700	1.11834e-07
135800	1.12093e-07
135900	1.09598e-07
136000	1.14283e-07
136100	1.19169e-07
136200	1.11553e-07
136300	1.11866e-07
136400	1.23129e-07
136500	1.24301e-07
136600	1.25311e-07
136700	1.24435e-07
136800	1.12597e-07
136900	1.09611e-07
137000	1.14734e-07
137100	1.20022e-07
137200	1.17802e-07
137300	1.24082e-07
137400	1.22253e-07
137500	1.20557e-07
137600	1.10784e-07
137700	1.11483e-07
137800	1.11578e-07
137900	1.12525e-07
138000	1.12373e-07
138100	1.09716e-07
138200	1.06856e-07
138300	1.09572e-07
138400	1.0476e-07
138500	1.10044e-07
138600	1.12625e-07
138700	1.14791e-07
138800	1.12769e-07
138900	1.18864e-07
139000	1.24052e-07
139100	1.15248e-07
139200	1.10019e-07
139300	1.14792e-07
139400	1.23455e-07
139500	1.15798e-07
139600	1.14689e-07
139700	1.17172e-07
139800	1.06665e-07
139900	1.16835e-07
140000	1.20663e-07
140100	1.17897e-07
140200	1.16355e-07
140300	1.11414e-07
140400	1.15111e-07
140500	1.09887e-07
140600	1.07014e-07
140700	1.0955e-07
140800	1.14179e-07
140900	1.17871e-07
141000	1.15449e-07
141100	1.10608e-07
141200	1.11549e-07
141300	1.14771e-07
141400	1.11927e-07
141500	1.13415e-07
141600	1.14215e-07
141700	1.12398e-07
141800	1.16508e-07
141900	1.12564e-07
142000	1.04656e-07
142100	1.11904e-07
142200	1.1676e-07
142300	1.18857e-07
142400	1.25887e-07
142500	1.14894e-07
142600	1.15794e-07
142700	1.17753e-07
142800	1.16899e-07
142900	1.22719e-07
143000	1.23315e-07
143100	1.23502e-07
143200	1.25042e-07
143300	1.25698e-07
143400	1.21952e-07
143500	1.19283e-07
143600	1.16204e-07
143700	1.2289e-07
143800	1.22338e-07
143900	1.17026e-07
144000	1.18171e-07
144100	1.13705e-07
144200	1.12826e-07
144300	1.1413e-07
144400	1.15121e-07
144500	1.18493e-07
144600	1.24148e-07
144700	1.16336e-07
144800	1.13497e-07
144900	1.13695e-07
145000	1.11116e-07
145100	1.14998e-07
145200	1.1578e-07
145300	1.16263e-07
145400	1.18148e-07
145500	1.1775e-07
145600	1.16202e-07
145700	1.11546e-07
145800	1.11012e-07
145900	1.18805e-07
146000	1.20634e-07
146100	1.29253e-07
146200	1.19862e-07
146300	1.08402e-07
146400	1.08684e-07
146500	1.11781e-07
146600	1.19272e-07
146700	1.23105e-07
146800	1.22983e-07
146900	1.22089e-07
147000	1.18078e-07
147100	1.11678e-07
147200	1.1118e-07
147300	1.16418e-07
147400	1.1905e-07
147500	1.1647e-07
147600	1.15114e-07
147700	1.16933e-07
147800	1.15992e-07
147900	1.15454e-07
148000	1.87442e-07
148100	2.20932e-07
148200	1.29919e-07
148300	1.28363e-07
148400	1.18361e-07
148500	1.12876e-07
148600	1.14832e-07
148700	1.20548e-07
148800	1.12941e-07
148900	1.12489e-07
149000	1.17445e-07
149100	1.22288e-07
149200	1.14967e-07
149300	1.15503e-07
149400	1.22049e-07
149500	1.14823e-07
149600	1.16323e-07
149700	1.18096e-07
149800	1.15807e-07
149900	1.23021e-07
150000	1.16987e-07
150100	1.11732e-07
150200	1.13757e-07
150300	1.17089e-07
150400	1.134e-07
150500	1.09073e-07
150600	1.12389e-07
150700	1.20338e-07
150800	1.18182e-07
150900	1.19821e-07
151000	1.1927e-07
151100	1.23917e-07
151200	1.24159e-07
151300	1.11348e-07
151400	1.18964e-07
151500	1.24506e-07
151600	1.14603e-07
151700	1.09694e-07
151800	1.14794e-07
151900	1.19932e-07
152000	1.16179e-07
152100	1.10936e-07
152200	1.19855e-07
152300	1.17667e-07
152400	1.15744e-07
152500	1.25577e-07
152600	1.15016e-07
152700	1.09774e-07
152800	1.15883e-07
152900	1.17672e-07
153000	1.18778e-07
153100	1.2235e-07
153200	1.16089e-07
153300	1.10391e-07
153400	1.12009e-07
153500	1.15446e-07
153600	1.15909e-07
153700	1.11761e-07
153800	1.11012e-07
153900	1.18834e-07
154000	1.17048e-07
154100	1.06064e-07
154200	1.06933e-07
154300	1.10914e-07
154400	1.0835e-07
154500	1.01015e-07
154600	1.07756e-07
154700	1.13675e-07
154800	1.13204e-07
154900	1.08333e-07
155000	1.02433e-07
155100	1.10618e-07
155200	1.20506e-07
155300	1.19482e-07
155400	1.22079e-07
155500	1.23518e-07
155600	1.18405e-07
155700	1.14114e-07
155800	1.15295e-07
155900	1.11851e-07
156000	1.26036e-07
156100	1.21099e-07
156200	1.20797e-07
156300	1.17227e-07
156400	1.17165e-07
156500	1.15902e-07
156600	1.09409e-07
156700	1.11476e-07
156800	1.16926e-07
156900	1.11722e-07
157000	1.16021e-07
157100	1.13226e-07
157200	1.13843e-07
157300	1.12526e-07
157400	1.18036e-07
157500	1.19544e-07
157600	1.17203e-07
157700	1.14639e-07
157800	1.12349e-07
157900	1.17399e-07
158000	1.18582e-07
158100	1.14983e-07
158200	1.16056e-07
158300	1.12939e-07
158400	1.08954e-07
158500	1.14355e-07
158600	1.13696e-07
158700	1.15748e-07
158800	1.12774e-07
158900	1.15626e-07
159000	1.18304e-07
159100	1.1943e-07
159200	1.18181e-07
159300	1.16705e-07
159400	1.09818e-07
159500	1.02358e-07
159600	1.06304e-07
159700	1.17284e-07
159800	1.1649e-07
159900	1.18208e-07
160000	1.114e-07
160100	1.04756e-07
160200	1.06839e-07
160300	1.05333e-07
160400	1.07886e-07
160500	1.12293e-07
160600	1.12205e-07
160700	1.09025e-07
160800	1.10819e-07
160900	1.1858e-07
161000	1.17853e-07
161100	1.19924e-07
161200	1.21025e-07
161300	1.10403e-07
161400	1.08969e-07
161500	1.12686e-07
161600	1.14814e-07
161700	1.14016e-07
161800	1.09348e-07
161900	1.06643e-07
162000	1.08882e-07
162100	1.0536e-07
162200	1.13082e-07
162300	1.16771e-07
162400	1.08117e-07
162500	1.13549e-07
162600	1.20326e-07
162700	1.18758e-07
162800	1.18748e-07
162900	1.162e-07
163000	1.1233e-07
163100	1.06548e-07
163200	1.12632e-07
163300	1.14073e-07
163400	1.04701e-07
163500	1.03478e-07
163600	1.0903e-07
163700	1.14923e-07
163800	1.1545e-07
163900	1.16494e-07
164000	1.1235e-07
164100	1.0639e-07
164200	1.16494e-07
164300	1.204e-07
164400	1.18119e-07
164500	1.22627e-07
164600	1.24149e-07
164700	1.22067e-07
164800	1.18265e-07
164900	1.19586e-07
165000	1.19799e-07
165100	1.1838e-07
165200	1.1179e-07
165300	1.19564e-07
165400	1.21253e-07
165500	1.15995e-07
165600	1.13791e-07
165700	1.12219e-07
165800	1.16005e-07
165900	1.17865e-07
166000	1.08979e-07
166100	1.13685e-07
166200	1.22768e-07
166300	1.19157e-07
166400	1.12644e-07
166500	1.12101e-07
166600	1.12391e-07
166700	1.21699e-07
166800	1.25757e-07
166900	1.35238e-07
167000	1.54606e-07
167100	1.52101e-07
167200	1.37738e-07
167300	1.20641e-07
167400	1.19817e-07
167500	1.37124e-07
167600	1.39101e-07
167700	1.24e-07
167800	1.27408e-07
167900	1.36759e-07
168000	1.25935e-07
168100	1.38241e-07
168200	1.33989e-07
168300	1.23192e-07
168400	1.39913e-07
168500	1.21046e-07
168600	1.28301e-07
168700	1.31046e-07
168800	1.50047e-07
168900	1.64555e-07
169000	1.83997e-07
169100	2.10318e-07
169200	1.78295e-07
169300	1.57433e-07
169400	2.35219e-07
169500	1.98654e-07
169600	1.4818e-07
169700	1.31673e-07
169800	1.38874e-07
169900	1.34276e-07
170000	1.27102e-07
170100	1.36786e-07
170200	1.31055e-07
170300	1.3669e-07
170400	1.33179e-07
170500	1.37171e-07
170600	1.62783e-07
170700	1.6454e-07
170800	1.43468e-07
170900	1.21179e-07
171000	1.12039e-07
171100	1.1197e-07
171200	1.14489e-07
171300	1.16541e-07
171400	1.11025e-07
171500	1.15776e-07
171600	1.1581e-07
171700	1.16655e-07
171800	1.16365e-07
171900	1.14698e-07
172000	1.13854e-07
172100	1.13213e-07
172200	1.11204e-07
172300	1.10986e-07
172400	1.07526e-07
172500	1.04095e-07
172600	1.11143e-07
172700	1.12592e-07
172800	1.08989e-07
172900	1.07537e-07
173000	1.18569e-07
173100	1.16047e-07
173200	1.12007e-07
173300	1.14506e-07
173400	1.18916e-07
173500	1.10456e-07
173600	1.10746e-07
173700	1.12122e-07
173800	1.13359e-07
173900	1.15034e-07
174000	1.03954e-07
174100	1.10723e-07
174200	1.08649e-07
174300	1.09813e-07
174400	1.16304e-07
174500	1.14737e-07
174600	1.13953e-07
174700	1.18223e-07
174800	1.10658e-07
174900	1.00948e-07
175000	1.13053e-07
175100	1.18441e-07
175200	1.16373e-07
175300	1.12636e-07
175400	1.11424e-07
175500	1.12693e-07
175600	1.11762e-07
175700	1.12553e-07
175800	1.08271e-07
175900	1.12732e-07
176000	1.20913e-07
176100	1.21326e-07
176200	1.1413e-07
176300	1.07323e-07
176400	1.14864e-07
176500	1.1702e-07
176600	1.20895e-07
176700	1.16413e-07
176800	1.1869e-07
176900	1.16557e-07
177000	1.1524e-07
177100	1.11157e-07
177200	1.09827e-07
177300	1.22445e-07
177400	1.20012e-07
177500	1.13514e-07
177600	1.13249e-07
177700	1.12864e-07
177800	1.12777e-07
177900	1.14771e-07
178000	1.07815e-07
178100	1.12567e-07
178200	1.15206e-07
178300	1.16797e-07
178400	1.13132e-07
178500	1.09205e-07
178600	1.06049e-07
178700	1.1236e-07
178800	1.10053e-07
178900	1.08375e-07
179000	1.07679e-07
179100	1.16297e-07
179200	1.18969e-07
179300	1.07229e-07
179400	1.11645e-07
179500	1.14868e-07
179600	1.72313e-07
179700	2.47407e-06
179800	3.06903e-06
179900	2.91805e-07
180000	1.14133e-07
180100	1.10797e-07
180200	1.07863e-07
180300	1.06285e-07
180400	1.06258e-07
180500	1.09869e-07
180600	1.13251e-07
180700	1.05984e-07
180800	1.12889e-07
180900	1.19078e-07
181000	1.20771e-07
181100	1.15368e-07
181200	1.1203e-07
181300	1.12094e-07
181400	1.16059e-07
181500	1.2026e-07
181600	1.17354e-07
181700	1.15367e-07
181800	1.1322e-07
181900	1.12691e-07
182000	1.14399e-07
182100	1.05825e-07
182200	1.07194e-07
182300	1.19358e-07
182400	1.14999e-07
182500	1.10216e-07
182600	1.09018e-07
182700	1.14706e-07
182800	1.12878e-07
182900	1.05029e-07
183000	1.07223e-07
183100	1.16735e-07
183200	1.18e-07
183300	1.17326e-07
183400	1.09814e-07
183500	1.05045e-07
183600	1.1108e-07
183700	1.08179e-07
183800	1.06524e-07
183900	1.12217e-07
184000	1.14392e-07
184100	1.10894e-07
184200	1.10793e-07
184300	1.17346e-07
184400	1.15732e-07
184500	1.13123e-07
184600	1.07779e-07
184700	1.08208e-07
184800	1.14769e-07
184900	1.12571e-07
185000	1.47101e-07
185100	1.85253e-07
185200	1.16271e-07
185300	1.12055e-07
185400	1.15779e-07
185500	1.13495e-07
185600	1.13264e-07
185700	1.17279e-07
185800	1.14984e-07
185900	1.1723e-07
186000	1.10741e-07
186100	1.07906e-07
186200	1.09022e-07
186300	1.05028e-07
186400	1.09891e-07
186500	1.15959e-07
186600	1.12294e-07
186700	1.05428e-07
186800	1.051e-07
186900	1.12159e-07
187000	1.15776e-07
187100	1.21437e-07
187200	1.13298e-07
187300	1.05767e-07
187400	1.07415e-07
187500	1.12021e-07
187600	1.11887e-07
187700	1.1224e-07
187800	1.14213e-07
187900	1.15482e-07
188000	1.11087e-07
188100	1.09146e-07
188200	1.11036e-07
188300	1.14228e-07
188400	1.15835e-07
188500	1.12111e-07
188600	1.11745e-07
188700	1.14457e-07
188800	1.17464e-07
188900	1.12717e-07
189000	1.11026e-07
189100	1.07147e-07
189200	1.145e-07
189300	1.22565e-07
189400	1.18069e-07
189500	1.08662e-07
189600	1.05669e-07
189700	1.10717e-07
189800	1.07107e-07
189900	1.12277e-07
190000	1.11235e-07
190100	1.0552e-07
190200	1.1124e-07
190300	1.101e-07
190400	1.07128e-07
190500	1.13503e-07
190600	1.11156e-07
190700	1.09178e-07
190800	1.08931e-07
190900	1.11459e-07
191000	1.09477e-07
191100	1.06e-07
191200	1.16134e-07
191300	1.26939e-07
191400	1.12059e-07
191500	1.12625e-07
191600	1.16435e-07
191700	1.15271e-07
191800	1.11996e-07
191900	1.15958e-07
192000	1.20281e-07
192100	1.18465e-07
192200	1.13465e-07
192300	1.08816e-07
192400	1.13542e-07
192500	1.08542e-07
192600	1.10797e-07
192700	1.15936e-07
192800	1.19481e-07
192900	1.12139e-07
193000	1.10977e-07
193100	1.1695e-07
193200	1.13758e-07
193300	1.15651e-07
193400	1.21071e-07
193500	1.09829e-07
193600	1.05856e-07
193700	1.05315e-07
193800	1.10524e-07
193900	1.12137e-07
194000	1.13849e-07
194100	1.10519e-07
194200	1.01528e-07
194300	1.06604e-07
194400	1.09654e-07
194500	1.09674e-07
194600	1.08768e-07
194700	1.05443e-07
194800	1.03927e-07
194900	1.08977e-07
195000	1.15917e-07
195100	1.16411e-07
195200	1.19567e-07
195300	1.21401e-07
195400	1.08913e-07
195500	1.04779e-07
195600	1.10337e-07
195700	1.1494e-07
195800	1.10717e-07
195900	1.1135e-07
196000	1.07076e-07
196100	1.09946e-07
196200	1.15515e-07
196300	1.15105e-07
196400	1.12737e-07
196500	1.01592e-07
196600	9.95323e-08
196700	1.085e-07
196800	1.11799e-07
196900	1.10323e-07
197000	1.12395e-07
197100	1.08858e-07
197200	1.04404e-07
197300	1.11905e-07
197400	1.1678e-07
197500	1.10306e-07
197600	1.08065e-07
197700	1.11669e-07
197800	1.12986e-07
197900	1.12033e-07
198000	1.08379e-07
198100	1.06621e-07
198200	1.15519e-07
198300	1.18894e-07
198400	1.18914e-07
198500	1.14618e-07
198600	1.11794e-07
198700	1.0471e-07
198800	9.83964e-08
198900	1.05335e-07
199000	1.122e-07
199100	1.17916e-07
199200	1.13546e-07
199300	1.14018e-07
199400	1.08978e-07
199500	1.10149e-07
199600	1.11126e-07
199700	1.08471e-07
[truncated: 1,003 more rows]

## Sheet: Sheet5
300K_48S
Freq(Hz)	Sv (arb.)
0	9.49757e-07
100	1.02853e-06
200	8.86254e-07
300	2.42988e-07
400	2.33438e-07
500	1.98322e-07
600	1.82654e-07
700	1.61091e-07
800	1.30963e-07
900	1.31935e-07
1000	1.278e-07
1100	1.30651e-07
1200	1.3119e-07
1300	1.284e-07
1400	1.26136e-07
1500	1.17018e-07
1600	1.22726e-07
1700	1.37726e-07
1800	1.21062e-07
1900	1.21126e-07
2000	1.25105e-07
2100	1.20176e-07
2200	1.11254e-07
2300	1.10343e-07
2400	1.22729e-07
2500	1.29687e-07
2600	1.26574e-07
2700	1.2014e-07
2800	1.22547e-07
2900	1.27227e-07
3000	1.28856e-07
3100	1.22096e-07
3200	1.20547e-07
3300	1.22032e-07
3400	1.33664e-07
3500	1.27407e-07
3600	1.22878e-07
3700	1.15069e-07
3800	1.16573e-07
3900	1.21318e-07
4000	1.2237e-07
4100	1.26514e-07
4200	1.24706e-07
4300	1.26897e-07
4400	1.27955e-07
4500	1.18768e-07
4600	1.2168e-07
4700	1.15847e-07
4800	1.18149e-07
4900	1.26057e-07
5000	1.212e-07
5100	1.20281e-07
5200	1.25e-07
5300	1.19976e-07
5400	1.19151e-07
5500	1.17455e-07
5600	1.14886e-07
5700	1.16889e-07
5800	1.15228e-07
5900	1.16698e-07
6000	1.12213e-07
6100	1.1255e-07
6200	1.05741e-07
6300	1.10797e-07
6400	1.18674e-07
6500	1.22522e-07
6600	1.15312e-07
6700	1.17937e-07
6800	1.23153e-07
6900	1.19558e-07
7000	1.2778e-07
7100	1.24324e-07
7200	1.16322e-07
7300	1.14224e-07
7400	1.12868e-07
7500	1.17906e-07
7600	1.17215e-07
7700	1.20304e-07
7800	1.14503e-07
7900	1.13273e-07
8000	1.16217e-07
8100	1.16897e-07
8200	1.15429e-07
8300	1.12525e-07
8400	1.19593e-07
8500	1.1057e-07
8600	1.08588e-07
8700	1.15774e-07
8800	1.1326e-07
8900	1.20803e-07
9000	1.11232e-07
9100	1.14065e-07
9200	1.23453e-07
9300	1.20987e-07
9400	1.20259e-07
9500	1.20132e-07
9600	1.09149e-07
9700	1.15008e-07
9800	1.10125e-07
9900	1.12968e-07
10000	1.09621e-07
10100	1.10916e-07
10200	1.15517e-07
10300	1.21337e-07
10400	1.16174e-07
10500	1.18626e-07
10600	1.18783e-07
10700	1.13174e-07
10800	1.13834e-07
10900	1.18356e-07
11000	1.17737e-07
11100	1.21859e-07
11200	1.18856e-07
11300	1.16555e-07
11400	1.24775e-07
11500	1.16473e-07
11600	1.10884e-07
11700	1.13007e-07
11800	1.16115e-07
11900	1.22331e-07
12000	1.11473e-07
12100	1.0908e-07
12200	1.14095e-07
12300	1.20723e-07
12400	1.23676e-07
12500	1.2275e-07
12600	1.21098e-07
12700	1.15056e-07
12800	1.20077e-07
12900	1.15148e-07
13000	1.11054e-07
13100	1.21235e-07
13200	1.21841e-07
13300	1.18086e-07
13400	1.11275e-07
13500	1.0951e-07
13600	1.15706e-07
13700	1.17702e-07
13800	1.20594e-07
13900	1.13047e-07
14000	1.10929e-07
14100	1.14115e-07
14200	1.14423e-07
14300	1.19959e-07
14400	1.13062e-07
14500	1.14332e-07
14600	1.2408e-07
14700	1.25966e-07
14800	1.23698e-07
14900	1.18417e-07
15000	1.20857e-07
15100	1.14816e-07
15200	1.11278e-07
15300	1.16759e-07
15400	1.15457e-07
15500	1.11736e-07
15600	1.16867e-07
15700	1.17469e-07
15800	1.12828e-07
15900	1.23917e-07
16000	1.25459e-07
16100	1.17192e-07
16200	1.11993e-07
16300	1.15829e-07
16400	1.13387e-07
16500	1.19037e-07
16600	1.15843e-07
16700	1.17119e-07
16800	1.23042e-07
16900	1.11153e-07
17000	1.07666e-07
17100	1.13656e-07
17200	1.11769e-07
17300	1.19894e-07
17400	1.22048e-07
17500	1.22585e-07
17600	1.18887e-07
17700	1.12351e-07
17800	1.15154e-07
17900	1.15449e-07
18000	1.15989e-07
18100	1.18423e-07
18200	1.2101e-07
18300	1.20552e-07
18400	1.24295e-07
18500	1.20623e-07
18600	1.19268e-07
18700	1.1976e-07
18800	1.19015e-07
18900	1.25952e-07
19000	1.25078e-07
19100	1.26912e-07
19200	1.1876e-07
19300	1.2527e-07
19400	1.19413e-07
19500	1.12355e-07
19600	1.24749e-07
19700	1.23741e-07
19800	1.16595e-07
19900	1.1443e-07
20000	1.13072e-07
20100	1.13144e-07
20200	1.19947e-07
20300	1.18049e-07
20400	1.18019e-07
20500	1.16413e-07
20600	1.1909e-07
20700	1.20111e-07
20800	1.16968e-07
20900	1.18656e-07
21000	1.19602e-07
21100	1.22927e-07
21200	1.27006e-07
21300	1.15476e-07
21400	1.08438e-07
21500	1.13193e-07
21600	1.1472e-07
21700	1.18891e-07
21800	1.20099e-07
21900	1.19379e-07
22000	1.23296e-07
22100	1.26547e-07
22200	1.25311e-07
22300	1.18826e-07
22400	1.12622e-07
22500	1.15586e-07
22600	1.19382e-07
22700	1.14066e-07
22800	1.12934e-07
22900	1.19047e-07
23000	1.20203e-07
23100	1.18025e-07
23200	1.17377e-07
23300	1.23018e-07
23400	1.22254e-07
23500	1.18888e-07
23600	1.23113e-07
23700	1.21567e-07
23800	1.11253e-07
23900	1.11362e-07
24000	1.12681e-07
24100	1.127e-07
24200	1.15347e-07
24300	1.16447e-07
24400	1.22744e-07
24500	1.19969e-07
24600	1.18752e-07
24700	1.19735e-07
24800	1.21069e-07
24900	1.18822e-07
25000	1.22862e-07
25100	1.23882e-07
25200	1.24172e-07
25300	1.1617e-07
25400	1.05329e-07
25500	1.08599e-07
25600	1.17136e-07
25700	1.17525e-07
25800	1.18963e-07
25900	1.31425e-07
26000	1.34398e-07
26100	1.27682e-07
26200	1.17891e-07
26300	1.21517e-07
26400	1.23057e-07
26500	1.17976e-07
26600	1.18995e-07
26700	1.1875e-07
26800	1.22286e-07
26900	1.28084e-07
27000	1.22803e-07
27100	1.15971e-07
27200	1.15436e-07
27300	1.20508e-07
27400	1.0965e-07
27500	1.08925e-07
27600	1.10359e-07
27700	1.11565e-07
27800	1.16582e-07
27900	1.25487e-07
28000	1.23832e-07
28100	1.19743e-07
28200	1.20285e-07
28300	1.23777e-07
28400	1.15653e-07
28500	1.16608e-07
28600	1.28272e-07
28700	1.1703e-07
28800	1.15119e-07
28900	1.23982e-07
29000	1.29176e-07
29100	1.21028e-07
29200	1.25173e-07
29300	1.19191e-07
29400	1.20833e-07
29500	1.25208e-07
29600	1.21786e-07
29700	1.14582e-07
29800	1.13063e-07
29900	1.12834e-07
30000	1.19139e-07
30100	1.17314e-07
30200	1.11678e-07
30300	1.08628e-07
30400	1.1399e-07
30500	1.18039e-07
30600	1.30282e-07
30700	1.26153e-07
30800	1.21835e-07
30900	1.18668e-07
31000	1.19105e-07
31100	1.10524e-07
31200	1.15088e-07
31300	1.14521e-07
31400	1.15541e-07
31500	1.2077e-07
31600	1.19365e-07
31700	1.14332e-07
31800	1.23057e-07
31900	1.18551e-07
32000	1.23309e-07
32100	1.259e-07
32200	1.18186e-07
32300	1.2237e-07
32400	1.15262e-07
32500	1.18821e-07
32600	1.25116e-07
32700	1.18783e-07
32800	1.12932e-07
32900	1.15777e-07
33000	1.19637e-07
33100	1.15871e-07
33200	1.05507e-07
33300	1.12222e-07
33400	1.12918e-07
33500	1.15205e-07
33600	1.18625e-07
33700	1.30504e-07
33800	1.24125e-07
33900	1.08074e-07
34000	1.15704e-07
34100	1.23219e-07
34200	1.2274e-07
34300	1.29998e-07
34400	1.179e-07
34500	1.15229e-07
34600	1.12576e-07
34700	1.18724e-07
34800	1.20253e-07
34900	1.22099e-07
35000	1.17344e-07
35100	1.2387e-07
35200	1.21852e-07
35300	1.18353e-07
35400	1.23382e-07
35500	1.21922e-07
35600	1.27143e-07
35700	1.20473e-07
35800	1.19308e-07
35900	1.27197e-07
36000	1.28843e-07
36100	1.18831e-07
36200	1.11515e-07
36300	1.14965e-07
36400	1.17332e-07
36500	1.13899e-07
36600	1.19919e-07
36700	1.13057e-07
36800	1.24888e-07
36900	2.24754e-06
37000	1.43578e-05
37100	5.89381e-06
37200	1.42357e-07
37300	1.27852e-07
37400	1.2401e-07
37500	1.16651e-07
37600	1.20259e-07
37700	1.22494e-07
37800	1.16672e-07
37900	1.1893e-07
38000	1.20281e-07
38100	1.19933e-07
38200	1.20438e-07
38300	1.15997e-07
38400	1.27573e-07
38500	1.25443e-07
38600	1.23835e-07
38700	1.14437e-07
38800	1.16236e-07
38900	1.18404e-07
39000	1.14651e-07
39100	1.15793e-07
39200	1.14006e-07
39300	1.15336e-07
39400	1.1451e-07
39500	1.16811e-07
39600	1.2045e-07
39700	1.19428e-07
39800	1.16222e-07
39900	1.14295e-07
40000	1.13897e-07
40100	1.25796e-07
40200	1.14837e-07
40300	1.23917e-07
40400	1.22289e-07
40500	1.17866e-07
40600	1.19251e-07
40700	1.18458e-07
40800	1.15589e-07
40900	1.16812e-07
41000	1.27114e-07
41100	1.28673e-07
41200	1.18943e-07
41300	1.25967e-07
41400	1.58939e-07
41500	3.49517e-07
41600	1.12001e-06
41700	3.16594e-06
41800	6.24854e-06
41900	6.62761e-06
42000	3.43621e-06
42100	6.94514e-06
42200	1.10545e-05
42300	2.63597e-05
42400	1.71474e-05
42500	8.90389e-06
42600	1.34253e-05
42700	7.76227e-06
42800	1.83242e-06
42900	3.49322e-07
43000	1.45372e-07
43100	1.29091e-07
43200	1.22809e-07
43300	1.97479e-07
43400	3.1205e-07
43500	1.52939e-07
43600	1.1886e-07
43700	1.1894e-07
43800	1.2117e-07
43900	1.2185e-07
44000	1.14882e-07
44100	1.21627e-07
44200	1.64595e-07
44300	1.35279e-07
44400	1.2165e-07
44500	1.24194e-07
44600	1.21088e-07
44700	1.14111e-07
44800	1.20152e-07
44900	2.32533e-07
45000	2.80599e-07
45100	1.37067e-07
45200	1.10364e-07
45300	1.15056e-07
45400	1.17437e-07
45500	1.21076e-07
45600	1.18068e-07
45700	1.20693e-07
45800	1.24742e-07
45900	1.16703e-07
46000	1.2095e-07
46100	1.24618e-07
46200	1.23312e-07
46300	1.16339e-07
46400	1.23373e-07
46500	1.29974e-07
46600	1.20086e-07
46700	1.20562e-07
46800	1.27002e-07
46900	1.16388e-07
47000	1.18544e-07
47100	1.23365e-07
47200	1.21982e-07
47300	1.18447e-07
47400	1.14259e-07
47500	1.19806e-07
47600	1.1539e-07
47700	1.19499e-07
47800	1.18243e-07
47900	1.18691e-07
48000	1.12379e-07
48100	1.09238e-07
48200	1.24522e-07
48300	1.23396e-07
48400	1.16038e-07
48500	1.21794e-07
48600	1.19642e-07
48700	1.1715e-07
48800	1.12774e-07
48900	1.19893e-07
49000	1.1746e-07
49100	1.21447e-07
49200	1.22258e-07
49300	1.216e-07
49400	1.21698e-07
49500	1.17668e-07
49600	1.18364e-07
49700	1.20175e-07
49800	1.14698e-07
49900	1.23905e-07
50000	1.24618e-07
50100	1.2777e-07
50200	1.3438e-07
50300	1.26594e-07
50400	1.2794e-07
50500	1.35282e-07
50600	1.27726e-07
50700	1.28463e-07
50800	1.3257e-07
50900	1.30206e-07
51000	1.25353e-07
51100	1.24233e-07
51200	1.31382e-07
51300	1.34545e-07
51400	1.33797e-07
51500	1.27013e-07
51600	1.2173e-07
51700	1.33619e-07
51800	1.34962e-07
51900	1.24807e-07
52000	1.24723e-07
52100	1.14189e-07
52200	1.15286e-07
52300	1.15836e-07
52400	1.10122e-07
52500	1.14909e-07
52600	1.18808e-07
52700	1.22041e-07
52800	1.27411e-07
52900	1.26512e-07
53000	1.20204e-07
53100	1.16249e-07
53200	1.15479e-07
53300	1.22994e-07
53400	1.25555e-07
53500	1.18157e-07
53600	1.13921e-07
53700	1.14994e-07
53800	1.2818e-07
53900	1.26117e-07
54000	1.25085e-07
54100	1.2009e-07
54200	1.1487e-07
54300	1.18862e-07
54400	1.15064e-07
54500	1.26523e-07
54600	1.3377e-07
54700	1.22384e-07
54800	1.17758e-07
54900	1.2189e-07
55000	1.2195e-07
55100	1.16176e-07
55200	1.08322e-07
55300	1.11174e-07
55400	1.15416e-07
55500	1.14807e-07
55600	1.15747e-07
55700	1.20847e-07
55800	1.1904e-07
55900	1.21754e-07
56000	1.17861e-07
56100	1.22058e-07
56200	1.21712e-07
56300	1.1932e-07
56400	1.17488e-07
56500	1.22386e-07
56600	1.21149e-07
56700	1.17886e-07
56800	1.20522e-07
56900	1.17787e-07
57000	1.2252e-07
57100	1.2881e-07
57200	1.27288e-07
57300	1.31516e-07
57400	1.19078e-07
57500	1.17833e-07
57600	1.24356e-07
57700	1.20502e-07
57800	1.21059e-07
57900	1.20801e-07
58000	1.16466e-07
58100	1.12827e-07
58200	1.22737e-07
58300	1.14844e-07
58400	1.18138e-07
58500	1.28072e-07
58600	1.26028e-07
58700	1.11138e-07
58800	1.12473e-07
58900	1.20517e-07
59000	1.22271e-07
59100	1.24275e-07
59200	1.19829e-07
59300	1.26546e-07
59400	1.25202e-07
59500	1.19802e-07
59600	1.08918e-07
59700	1.26741e-07
59800	4.75e-06
59900	3.41527e-05
60000	1.49871e-05
60100	2.06315e-07
60200	1.24068e-07
60300	1.20751e-07
60400	1.2508e-07
60500	1.17693e-07
60600	1.08984e-07
60700	1.13271e-07
60800	1.24196e-07
60900	1.22659e-07
61000	1.15524e-07
61100	1.12079e-07
61200	1.1117e-07
61300	1.22744e-07
61400	1.27923e-07
61500	1.28923e-07
61600	1.20267e-07
61700	1.15468e-07
61800	1.20532e-07
61900	1.20663e-07
62000	1.18612e-07
62100	1.1637e-07
62200	1.10923e-07
62300	1.20307e-07
62400	1.19508e-07
62500	1.28135e-07
62600	1.24769e-07
62700	1.17087e-07
62800	1.10298e-07
62900	1.17547e-07
63000	1.21367e-07
63100	1.0968e-07
63200	1.04841e-07
63300	1.14319e-07
63400	1.14605e-07
63500	1.1969e-07
63600	1.23939e-07
63700	1.21418e-07
63800	1.21719e-07
63900	1.20752e-07
64000	1.21128e-07
64100	1.23232e-07
64200	1.18527e-07
64300	1.19604e-07
64400	1.16827e-07
64500	1.21501e-07
64600	1.15945e-07
64700	1.1193e-07
64800	1.19977e-07
64900	1.27236e-07
65000	1.17046e-07
65100	1.20108e-07
65200	1.2105e-07
65300	1.21738e-07
65400	1.1823e-07
65500	1.13386e-07
65600	1.1675e-07
65700	1.19528e-07
65800	1.10229e-07
65900	1.10753e-07
66000	1.17249e-07
66100	1.16844e-07
66200	1.36052e-07
66300	1.29632e-07
66400	1.19328e-07
66500	1.3266e-07
66600	1.25984e-07
66700	1.21243e-07
66800	1.26923e-07
66900	1.32596e-07
67000	1.30949e-07
67100	1.61063e-07
67200	2.47858e-07
67300	2.13424e-07
67400	1.80816e-07
67500	1.36195e-07
67600	1.17984e-07
67700	1.23017e-07
67800	1.75632e-07
67900	2.36603e-07
68000	3.25811e-07
68100	4.56308e-07
68200	7.62708e-07
68300	4.75813e-06
68400	4.44102e-06
68500	2.18318e-06
68600	6.4895e-07
68700	3.23911e-07
68800	1.69581e-07
68900	1.62825e-07
69000	1.33499e-07
69100	1.22635e-07
69200	1.37657e-07
69300	1.28017e-07
69400	1.32942e-07
69500	1.28456e-07
69600	1.13392e-07
69700	1.15107e-07
69800	1.18104e-07
69900	1.20665e-07
70000	1.22972e-07
70100	1.26459e-07
70200	1.20537e-07
70300	1.24288e-07
70400	1.26274e-07
70500	1.19155e-07
70600	1.15242e-07
70700	1.18027e-07
70800	1.24509e-07
70900	1.19729e-07
71000	1.15364e-07
71100	1.17895e-07
71200	1.29177e-07
71300	1.15609e-07
71400	1.11243e-07
71500	1.1826e-07
71600	1.17343e-07
71700	1.14721e-07
71800	1.18971e-07
71900	1.25228e-07
72000	1.14323e-07
72100	1.2423e-07
72200	1.2042e-07
72300	1.10798e-07
72400	1.13721e-07
72500	1.14134e-07
72600	1.11431e-07
72700	1.15163e-07
72800	1.17897e-07
72900	1.22818e-07
73000	1.24551e-07
73100	1.1792e-07
73200	1.18807e-07
73300	1.27333e-07
73400	1.23646e-07
73500	1.14878e-07
73600	1.23628e-07
73700	1.17132e-07
73800	1.15042e-07
73900	3.38e-07
74000	2.69278e-06
74100	1.75007e-06
74200	1.45252e-07
74300	1.25382e-07
74400	1.20599e-07
74500	1.17251e-07
74600	1.28456e-07
74700	1.24874e-07
74800	1.13434e-07
74900	1.18795e-07
75000	1.15932e-07
75100	1.15211e-07
75200	1.23087e-07
75300	1.24661e-07
75400	1.17279e-07
75500	1.12864e-07
75600	1.19748e-07
75700	1.22604e-07
75800	1.18668e-07
75900	1.21913e-07
76000	1.16439e-07
76100	1.15732e-07
76200	1.13792e-07
76300	1.09117e-07
76400	1.13584e-07
76500	1.2199e-07
76600	1.21721e-07
76700	1.19333e-07
76800	1.26267e-07
76900	1.21163e-07
77000	1.21317e-07
77100	1.14141e-07
77200	1.13992e-07
77300	1.1999e-07
77400	1.10832e-07
77500	1.09666e-07
77600	1.16352e-07
77700	1.16701e-07
77800	1.1944e-07
77900	1.20385e-07
78000	1.17224e-07
78100	1.17908e-07
78200	1.24027e-07
78300	1.26988e-07
78400	1.2608e-07
78500	1.16062e-07
78600	1.13858e-07
78700	1.11011e-07
78800	1.14475e-07
78900	1.19529e-07
79000	1.22372e-07
79100	1.15115e-07
79200	1.18271e-07
79300	1.2168e-07
79400	1.15317e-07
79500	1.13581e-07
79600	1.20805e-07
79700	1.20072e-07
79800	1.18663e-07
79900	1.21734e-07
80000	1.14226e-07
80100	1.21507e-07
80200	1.28504e-07
80300	1.15045e-07
80400	1.19573e-07
80500	1.15349e-07
80600	1.19672e-07
80700	1.19948e-07
80800	1.25905e-07
80900	1.28676e-07
81000	1.22402e-07
81100	1.20645e-07
81200	1.20194e-07
81300	1.25724e-07
81400	1.22535e-07
81500	1.21463e-07
81600	1.21762e-07
81700	1.22298e-07
81800	1.18356e-07
81900	1.20199e-07
82000	1.09596e-07
82100	1.13581e-07
82200	1.2239e-07
82300	1.15119e-07
82400	1.14564e-07
82500	1.12734e-07
82600	1.2228e-07
82700	1.2212e-07
82800	1.14896e-07
82900	1.16262e-07
83000	1.23484e-07
83100	1.19128e-07
83200	1.25507e-07
83300	1.34603e-07
83400	1.47862e-07
83500	1.72516e-07
83600	1.93439e-07
83700	1.67967e-07
83800	1.29169e-07
83900	1.47663e-07
84000	1.58496e-07
84100	1.54125e-07
84200	1.73018e-07
84300	1.70152e-07
84400	1.9946e-07
84500	2.37644e-07
84600	3.07077e-07
84700	2.99685e-07
84800	2.14646e-07
84900	1.67708e-07
85000	1.70071e-07
85100	1.55862e-07
85200	1.8035e-07
85300	2.17632e-07
85400	1.72765e-07
85500	1.34202e-07
85600	1.29032e-07
85700	1.23068e-07
85800	1.21001e-07
85900	1.2233e-07
86000	1.22806e-07
86100	1.29024e-07
86200	1.312e-07
86300	1.17629e-07
86400	1.17363e-07
86500	1.13298e-07
86600	1.17585e-07
86700	1.23547e-07
86800	1.15074e-07
86900	1.2325e-07
87000	1.24838e-07
87100	1.23604e-07
87200	1.21018e-07
87300	1.21456e-07
87400	1.22332e-07
87500	1.25714e-07
87600	1.33562e-07
87700	1.20153e-07
87800	1.19484e-07
87900	1.12681e-07
88000	1.12034e-07
88100	1.09708e-07
88200	1.14829e-07
88300	1.25355e-07
88400	1.21568e-07
88500	1.23278e-07
88600	1.229e-07
88700	1.19335e-07
88800	1.18598e-07
88900	1.21819e-07
89000	1.19756e-07
89100	1.15997e-07
89200	1.20657e-07
89300	1.35631e-07
89400	1.34715e-07
89500	1.25833e-07
89600	1.18701e-07
89700	1.15383e-07
89800	1.15653e-07
89900	1.1776e-07
90000	1.12366e-07
90100	1.10671e-07
90200	1.26378e-07
90300	1.0731e-07
90400	1.16331e-07
90500	1.19521e-07
90600	1.17691e-07
90700	1.20742e-07
90800	1.18823e-07
90900	1.29743e-07
91000	1.27415e-07
91100	1.21739e-07
91200	1.19481e-07
91300	1.17717e-07
91400	1.11007e-07
91500	1.15933e-07
91600	1.13697e-07
91700	1.14577e-07
91800	1.18289e-07
91900	1.17523e-07
92000	1.13904e-07
92100	1.17743e-07
92200	1.17155e-07
92300	1.20452e-07
92400	1.16782e-07
92500	1.21707e-07
92600	1.17129e-07
92700	1.21635e-07
92800	1.18205e-07
92900	1.2247e-07
93000	1.23366e-07
93100	1.16672e-07
93200	1.19253e-07
93300	1.20792e-07
93400	1.16096e-07
93500	1.29381e-07
93600	1.15823e-07
93700	1.12115e-07
93800	1.16578e-07
93900	1.21013e-07
94000	1.22761e-07
94100	1.22205e-07
94200	1.23524e-07
94300	1.12321e-07
94400	1.03946e-07
94500	1.14895e-07
94600	1.17925e-07
94700	1.15497e-07
94800	1.1676e-07
94900	1.13987e-07
95000	1.08461e-07
95100	1.1749e-07
95200	1.16415e-07
95300	1.15869e-07
95400	1.22375e-07
95500	1.13388e-07
95600	1.11274e-07
95700	1.10591e-07
95800	1.19727e-07
95900	1.19826e-07
96000	1.11687e-07
96100	1.12859e-07
96200	1.19509e-07
96300	1.2529e-07
96400	1.25293e-07
96500	1.21807e-07
96600	1.12946e-07
96700	1.11127e-07
96800	1.1555e-07
96900	1.22354e-07
97000	1.13217e-07
97100	1.11719e-07
97200	1.20316e-07
97300	1.13629e-07
97400	1.11852e-07
97500	1.17938e-07
97600	1.21869e-07
97700	1.18375e-07
97800	1.13616e-07
97900	1.17626e-07
98000	1.25904e-07
98100	1.19137e-07
98200	1.18453e-07
98300	1.24496e-07
98400	1.23714e-07
98500	1.17091e-07
98600	1.2263e-07
98700	1.1625e-07
98800	1.14105e-07
98900	1.14916e-07
99000	1.14979e-07
99100	1.1131e-07
99200	1.1552e-07
99300	1.2014e-07
99400	1.22333e-07
99500	1.20416e-07
99600	1.25378e-07
99700	1.29309e-07
99800	1.22052e-07
99900	1.27671e-07
100000	1.22242e-07
100100	1.17431e-07
100200	1.17438e-07
100300	1.16992e-07
100400	1.13572e-07
100500	1.16229e-07
100600	1.1879e-07
100700	1.24927e-07
100800	1.23052e-07
100900	1.20359e-07
101000	1.25823e-07
101100	1.25032e-07
101200	1.27614e-07
101300	1.20753e-07
101400	1.19377e-07
101500	1.19048e-07
101600	1.224e-07
101700	1.25292e-07
101800	1.22094e-07
101900	1.21075e-07
102000	1.21458e-07
102100	1.20455e-07
102200	1.24921e-07
102300	1.19846e-07
102400	1.27794e-07
102500	1.18112e-07
102600	1.18295e-07
102700	1.28194e-07
102800	1.21139e-07
102900	1.18112e-07
103000	1.15127e-07
103100	1.15561e-07
103200	1.21467e-07
103300	1.242e-07
103400	1.22115e-07
103500	1.1991e-07
103600	1.17298e-07
103700	1.13655e-07
103800	1.14957e-07
103900	1.09888e-07
104000	1.20145e-07
104100	1.22097e-07
104200	1.23568e-07
104300	1.27008e-07
104400	1.26526e-07
104500	1.18125e-07
104600	1.18383e-07
104700	1.23179e-07
104800	1.16202e-07
104900	1.08592e-07
105000	1.1663e-07
105100	1.21181e-07
105200	1.18353e-07
105300	1.27657e-07
105400	1.23409e-07
105500	1.11554e-07
105600	1.10738e-07
105700	1.17763e-07
105800	1.16623e-07
105900	1.16365e-07
106000	1.12304e-07
106100	1.19061e-07
106200	1.16093e-07
106300	1.0632e-07
106400	1.08709e-07
106500	1.14456e-07
106600	1.13173e-07
106700	1.18431e-07
106800	1.22517e-07
106900	1.20291e-07
107000	1.16912e-07
107100	1.17161e-07
107200	1.12148e-07
107300	1.08067e-07
107400	1.13645e-07
107500	1.20484e-07
107600	1.22918e-07
107700	1.22655e-07
107800	1.18231e-07
107900	1.25924e-07
108000	1.22885e-07
108100	1.17163e-07
108200	1.20496e-07
108300	1.21402e-07
108400	1.26681e-07
108500	1.27079e-07
108600	1.2858e-07
108700	1.18771e-07
108800	1.16919e-07
108900	1.18816e-07
109000	1.26823e-07
109100	1.18801e-07
109200	1.17747e-07
109300	1.17021e-07
109400	1.20659e-07
109500	1.19334e-07
109600	1.1401e-07
109700	1.18759e-07
109800	1.22809e-07
109900	1.18381e-07
110000	1.2216e-07
110100	1.21401e-07
110200	1.23504e-07
110300	1.2052e-07
110400	1.13494e-07
110500	1.07592e-07
110600	1.17344e-07
110700	1.24559e-07
110800	1.13042e-07
110900	1.515e-07
111000	9.5407e-07
111100	9.28925e-07
111200	1.52117e-07
111300	1.17587e-07
111400	1.26766e-07
111500	1.17386e-07
111600	1.1591e-07
111700	1.21444e-07
111800	1.1553e-07
111900	1.13586e-07
112000	1.12079e-07
112100	1.14404e-07
112200	1.17886e-07
112300	1.15774e-07
112400	1.15745e-07
112500	1.12642e-07
112600	1.11931e-07
112700	1.19445e-07
112800	1.2129e-07
112900	1.17794e-07
113000	1.12287e-07
113100	1.17382e-07
113200	1.20434e-07
113300	1.16671e-07
113400	1.1771e-07
113500	1.16447e-07
113600	1.10744e-07
113700	1.11635e-07
113800	1.26399e-07
113900	1.23897e-07
114000	1.16739e-07
114100	1.17571e-07
114200	1.19562e-07
114300	1.24348e-07
114400	1.1412e-07
114500	1.13491e-07
114600	1.26929e-07
114700	1.1688e-07
114800	1.16462e-07
114900	1.2025e-07
115000	1.18978e-07
115100	1.24938e-07
115200	1.2733e-07
115300	1.14662e-07
115400	1.10135e-07
115500	1.21356e-07
115600	1.13541e-07
115700	1.11004e-07
115800	1.12886e-07
115900	1.15736e-07
116000	1.14696e-07
116100	1.15582e-07
116200	1.16171e-07
116300	1.14298e-07
116400	1.1977e-07
116500	1.20317e-07
116600	1.15097e-07
116700	1.16899e-07
116800	1.19862e-07
116900	1.18998e-07
117000	1.22526e-07
117100	1.17878e-07
117200	1.12091e-07
117300	1.1391e-07
117400	1.21638e-07
117500	1.12664e-07
117600	1.11898e-07
117700	1.11328e-07
117800	1.06978e-07
117900	1.0777e-07
118000	1.20096e-07
118100	1.2819e-07
118200	1.15296e-07
118300	1.17473e-07
118400	1.20193e-07
118500	1.19727e-07
118600	1.12985e-07
118700	1.08621e-07
118800	1.15025e-07
118900	1.14706e-07
119000	1.07421e-07
119100	1.14793e-07
119200	1.20206e-07
119300	1.24532e-07
119400	1.15108e-07
119500	1.09602e-07
119600	1.17173e-07
119700	1.23639e-07
119800	2.10193e-07
119900	1.82538e-07
120000	1.12424e-07
120100	1.14081e-07
120200	1.19075e-07
120300	1.19446e-07
120400	1.12398e-07
120500	1.10484e-07
120600	1.22979e-07
120700	1.27028e-07
120800	1.23096e-07
120900	1.22349e-07
121000	1.17565e-07
121100	1.15539e-07
121200	1.08817e-07
121300	1.1259e-07
121400	1.17017e-07
121500	1.15942e-07
121600	1.20635e-07
121700	1.16744e-07
121800	1.16085e-07
121900	1.17339e-07
122000	1.18066e-07
122100	1.10735e-07
122200	1.18673e-07
122300	1.22329e-07
122400	1.12844e-07
122500	1.09862e-07
122600	1.17493e-07
122700	1.15965e-07
122800	1.11165e-07
122900	1.11877e-07
123000	1.13886e-07
123100	1.13325e-07
123200	1.21322e-07
123300	1.186e-07
123400	1.15441e-07
123500	1.14941e-07
123600	1.27602e-07
123700	1.23188e-07
123800	1.236e-07
123900	1.18837e-07
124000	1.22923e-07
124100	1.1806e-07
124200	1.15245e-07
124300	1.19281e-07
124400	1.18098e-07
124500	1.25206e-07
124600	1.23613e-07
124700	1.34797e-07
124800	1.38931e-07
124900	1.84574e-07
125000	2.58395e-07
125100	4.21947e-07
125200	6.59513e-07
125300	8.42642e-07
125400	7.4858e-07
125500	3.91852e-07
125600	2.1352e-07
125700	4.8833e-07
125800	6.32315e-07
125900	3.63221e-07
126000	4.78965e-07
126100	6.31426e-07
126200	4.21478e-07
126300	6.35376e-07
126400	5.47696e-07
126500	7.61056e-07
126600	8.83796e-07
126700	1.36535e-06
126800	2.24412e-06
126900	2.18578e-06
127000	2.6377e-06
127100	2.71153e-06
127200	1.33624e-06
127300	8.02029e-07
127400	7.6651e-07
127500	8.01778e-07
127600	8.00625e-07
127700	8.95375e-07
127800	7.10794e-07
127900	1.46117e-06
128000	1.62203e-06
128100	1.00293e-06
128200	4.58299e-07
128300	2.06386e-07
128400	1.35141e-07
128500	1.22363e-07
128600	1.17578e-07
128700	1.13617e-07
128800	1.18697e-07
128900	1.15473e-07
129000	1.14658e-07
129100	1.10433e-07
129200	1.15229e-07
129300	1.21556e-07
129400	1.14467e-07
129500	1.15348e-07
129600	1.22314e-07
129700	1.2311e-07
129800	1.21037e-07
129900	1.16664e-07
130000	1.15073e-07
130100	1.19557e-07
130200	1.22215e-07
130300	1.20721e-07
130400	1.24356e-07
130500	1.24067e-07
130600	1.18094e-07
130700	1.20562e-07
130800	1.10256e-07
130900	1.07221e-07
131000	1.07054e-07
131100	1.12497e-07
131200	1.14749e-07
131300	1.06572e-07
131400	1.09446e-07
131500	1.07153e-07
131600	1.09303e-07
131700	1.13149e-07
131800	1.09642e-07
131900	1.16314e-07
132000	1.17858e-07
132100	1.11451e-07
132200	1.10317e-07
132300	1.08687e-07
132400	1.11638e-07
132500	1.13408e-07
132600	1.15939e-07
132700	1.19519e-07
132800	1.13398e-07
132900	1.15527e-07
133000	1.13786e-07
133100	1.06721e-07
133200	1.1166e-07
133300	1.17077e-07
133400	1.22956e-07
133500	1.09868e-07
133600	1.01761e-07
133700	1.14398e-07
133800	1.17495e-07
133900	1.16671e-07
134000	1.16989e-07
134100	1.17005e-07
134200	1.1434e-07
134300	1.04205e-07
134400	1.2098e-07
134500	1.25695e-07
134600	1.22019e-07
134700	1.18112e-07
134800	1.17638e-07
134900	1.15926e-07
135000	1.12419e-07
135100	1.15517e-07
135200	1.1864e-07
135300	1.13488e-07
135400	1.10147e-07
135500	1.1364e-07
135600	1.10341e-07
135700	1.11834e-07
135800	1.12093e-07
135900	1.09598e-07
136000	1.14283e-07
136100	1.19169e-07
136200	1.11553e-07
136300	1.11866e-07
136400	1.23129e-07
136500	1.24301e-07
136600	1.25311e-07
136700	1.24435e-07
136800	1.12597e-07
136900	1.09611e-07
137000	1.14734e-07
137100	1.20022e-07
137200	1.17802e-07
137300	1.24082e-07
137400	1.22253e-07
137500	1.20557e-07
137600	1.10784e-07
137700	1.11483e-07
137800	1.11578e-07
137900	1.12525e-07
138000	1.12373e-07
138100	1.09716e-07
138200	1.06856e-07
138300	1.09572e-07
138400	1.0476e-07
138500	1.10044e-07
138600	1.12625e-07
138700	1.14791e-07
138800	1.12769e-07
138900	1.18864e-07
139000	1.24052e-07
139100	1.15248e-07
139200	1.10019e-07
139300	1.14792e-07
139400	1.23455e-07
139500	1.15798e-07
139600	1.14689e-07
139700	1.17172e-07
139800	1.06665e-07
139900	1.16835e-07
140000	1.20663e-07
140100	1.17897e-07
140200	1.16355e-07
140300	1.11414e-07
140400	1.15111e-07
140500	1.09887e-07
140600	1.07014e-07
140700	1.0955e-07
140800	1.14179e-07
140900	1.17871e-07
141000	1.15449e-07
141100	1.10608e-07
141200	1.11549e-07
141300	1.14771e-07
141400	1.11927e-07
141500	1.13415e-07
141600	1.14215e-07
141700	1.12398e-07
141800	1.16508e-07
141900	1.12564e-07
142000	1.04656e-07
142100	1.11904e-07
142200	1.1676e-07
142300	1.18857e-07
142400	1.25887e-07
142500	1.14894e-07
142600	1.15794e-07
142700	1.17753e-07
142800	1.16899e-07
142900	1.22719e-07
143000	1.23315e-07
143100	1.23502e-07
143200	1.25042e-07
143300	1.25698e-07
143400	1.21952e-07
143500	1.19283e-07
143600	1.16204e-07
143700	1.2289e-07
143800	1.22338e-07
143900	1.17026e-07
144000	1.18171e-07
144100	1.13705e-07
144200	1.12826e-07
144300	1.1413e-07
144400	1.15121e-07
144500	1.18493e-07
144600	1.24148e-07
144700	1.16336e-07
144800	1.13497e-07
144900	1.13695e-07
145000	1.11116e-07
145100	1.14998e-07
145200	1.1578e-07
145300	1.16263e-07
145400	1.18148e-07
145500	1.1775e-07
145600	1.16202e-07
145700	1.11546e-07
145800	1.11012e-07
145900	1.18805e-07
146000	1.20634e-07
146100	1.29253e-07
146200	1.19862e-07
146300	1.08402e-07
146400	1.08684e-07
146500	1.11781e-07
146600	1.19272e-07
146700	1.23105e-07
146800	1.22983e-07
146900	1.22089e-07
147000	1.18078e-07
147100	1.11678e-07
147200	1.1118e-07
147300	1.16418e-07
147400	1.1905e-07
147500	1.1647e-07
147600	1.15114e-07
147700	1.16933e-07
147800	1.15992e-07
147900	1.15454e-07
148000	1.87442e-07
148100	2.20932e-07
148200	1.29919e-07
148300	1.28363e-07
148400	1.18361e-07
148500	1.12876e-07
148600	1.14832e-07
148700	1.20548e-07
148800	1.12941e-07
148900	1.12489e-07
149000	1.17445e-07
149100	1.22288e-07
149200	1.14967e-07
149300	1.15503e-07
149400	1.22049e-07
149500	1.14823e-07
149600	1.16323e-07
149700	1.18096e-07
149800	1.15807e-07
149900	1.23021e-07
150000	1.16987e-07
150100	1.11732e-07
150200	1.13757e-07
150300	1.17089e-07
150400	1.134e-07
150500	1.09073e-07
150600	1.12389e-07
150700	1.20338e-07
150800	1.18182e-07
150900	1.19821e-07
151000	1.1927e-07
151100	1.23917e-07
151200	1.24159e-07
151300	1.11348e-07
151400	1.18964e-07
151500	1.24506e-07
151600	1.14603e-07
151700	1.09694e-07
151800	1.14794e-07
151900	1.19932e-07
152000	1.16179e-07
152100	1.10936e-07
152200	1.19855e-07
152300	1.17667e-07
152400	1.15744e-07
152500	1.25577e-07
152600	1.15016e-07
152700	1.09774e-07
152800	1.15883e-07
152900	1.17672e-07
153000	1.18778e-07
153100	1.2235e-07
153200	1.16089e-07
153300	1.10391e-07
153400	1.12009e-07
153500	1.15446e-07
153600	1.15909e-07
153700	1.11761e-07
153800	1.11012e-07
153900	1.18834e-07
154000	1.17048e-07
154100	1.06064e-07
154200	1.06933e-07
154300	1.10914e-07
154400	1.0835e-07
154500	1.01015e-07
154600	1.07756e-07
154700	1.13675e-07
154800	1.13204e-07
154900	1.08333e-07
155000	1.02433e-07
155100	1.10618e-07
155200	1.20506e-07
155300	1.19482e-07
155400	1.22079e-07
155500	1.23518e-07
155600	1.18405e-07
155700	1.14114e-07
155800	1.15295e-07
155900	1.11851e-07
156000	1.26036e-07
156100	1.21099e-07
156200	1.20797e-07
156300	1.17227e-07
156400	1.17165e-07
156500	1.15902e-07
156600	1.09409e-07
156700	1.11476e-07
156800	1.16926e-07
156900	1.11722e-07
157000	1.16021e-07
157100	1.13226e-07
157200	1.13843e-07
157300	1.12526e-07
157400	1.18036e-07
157500	1.19544e-07
157600	1.17203e-07
157700	1.14639e-07
157800	1.12349e-07
157900	1.17399e-07
158000	1.18582e-07
158100	1.14983e-07
158200	1.16056e-07
158300	1.12939e-07
158400	1.08954e-07
158500	1.14355e-07
158600	1.13696e-07
158700	1.15748e-07
158800	1.12774e-07
158900	1.15626e-07
159000	1.18304e-07
159100	1.1943e-07
159200	1.18181e-07
159300	1.16705e-07
159400	1.09818e-07
159500	1.02358e-07
159600	1.06304e-07
159700	1.17284e-07
159800	1.1649e-07
159900	1.18208e-07
160000	1.114e-07
160100	1.04756e-07
160200	1.06839e-07
160300	1.05333e-07
160400	1.07886e-07
160500	1.12293e-07
160600	1.12205e-07
160700	1.09025e-07
160800	1.10819e-07
160900	1.1858e-07
161000	1.17853e-07
161100	1.19924e-07
161200	1.21025e-07
161300	1.10403e-07
161400	1.08969e-07
161500	1.12686e-07
161600	1.14814e-07
161700	1.14016e-07
161800	1.09348e-07
161900	1.06643e-07
162000	1.08882e-07
162100	1.0536e-07
162200	1.13082e-07
162300	1.16771e-07
162400	1.08117e-07
162500	1.13549e-07
162600	1.20326e-07
162700	1.18758e-07
162800	1.18748e-07
162900	1.162e-07
163000	1.1233e-07
163100	1.06548e-07
163200	1.12632e-07
163300	1.14073e-07
163400	1.04701e-07
163500	1.03478e-07
163600	1.0903e-07
163700	1.14923e-07
163800	1.1545e-07
163900	1.16494e-07
164000	1.1235e-07
164100	1.0639e-07
164200	1.16494e-07
164300	1.204e-07
164400	1.18119e-07
164500	1.22627e-07
164600	1.24149e-07
164700	1.22067e-07
164800	1.18265e-07
164900	1.19586e-07
165000	1.19799e-07
165100	1.1838e-07
165200	1.1179e-07
165300	1.19564e-07
165400	1.21253e-07
165500	1.15995e-07
165600	1.13791e-07
165700	1.12219e-07
165800	1.16005e-07
165900	1.17865e-07
166000	1.08979e-07
166100	1.13685e-07
166200	1.22768e-07
166300	1.19157e-07
166400	1.12644e-07
166500	1.12101e-07
166600	1.12391e-07
166700	1.21699e-07
166800	1.25757e-07
166900	1.35238e-07
167000	1.54606e-07
167100	1.52101e-07
167200	1.37738e-07
167300	1.20641e-07
167400	1.19817e-07
167500	1.37124e-07
167600	1.39101e-07
167700	1.24e-07
167800	1.27408e-07
167900	1.36759e-07
168000	1.25935e-07
168100	1.38241e-07
168200	1.33989e-07
168300	1.23192e-07
168400	1.39913e-07
168500	1.21046e-07
168600	1.28301e-07
168700	1.31046e-07
168800	1.50047e-07
168900	1.64555e-07
169000	1.83997e-07
169100	2.10318e-07
169200	1.78295e-07
169300	1.57433e-07
169400	2.35219e-07
169500	1.98654e-07
169600	1.4818e-07
169700	1.31673e-07
169800	1.38874e-07
169900	1.34276e-07
170000	1.27102e-07
170100	1.36786e-07
170200	1.31055e-07
170300	1.3669e-07
170400	1.33179e-07
170500	1.37171e-07
170600	1.62783e-07
170700	1.6454e-07
170800	1.43468e-07
170900	1.21179e-07
171000	1.12039e-07
171100	1.1197e-07
171200	1.14489e-07
171300	1.16541e-07
171400	1.11025e-07
171500	1.15776e-07
171600	1.1581e-07
171700	1.16655e-07
171800	1.16365e-07
171900	1.14698e-07
172000	1.13854e-07
172100	1.13213e-07
172200	1.11204e-07
172300	1.10986e-07
172400	1.07526e-07
172500	1.04095e-07
172600	1.11143e-07
172700	1.12592e-07
172800	1.08989e-07
172900	1.07537e-07
173000	1.18569e-07
173100	1.16047e-07
173200	1.12007e-07
173300	1.14506e-07
173400	1.18916e-07
173500	1.10456e-07
173600	1.10746e-07
173700	1.12122e-07
173800	1.13359e-07
173900	1.15034e-07
174000	1.03954e-07
174100	1.10723e-07
174200	1.08649e-07
174300	1.09813e-07
174400	1.16304e-07
174500	1.14737e-07
174600	1.13953e-07
174700	1.18223e-07
174800	1.10658e-07
174900	1.00948e-07
175000	1.13053e-07
175100	1.18441e-07
175200	1.16373e-07
175300	1.12636e-07
175400	1.11424e-07
175500	1.12693e-07
175600	1.11762e-07
175700	1.12553e-07
175800	1.08271e-07
175900	1.12732e-07
176000	1.20913e-07
176100	1.21326e-07
176200	1.1413e-07
176300	1.07323e-07
176400	1.14864e-07
176500	1.1702e-07
176600	1.20895e-07
176700	1.16413e-07
176800	1.1869e-07
176900	1.16557e-07
177000	1.1524e-07
177100	1.11157e-07
177200	1.09827e-07
177300	1.22445e-07
177400	1.20012e-07
177500	1.13514e-07
177600	1.13249e-07
177700	1.12864e-07
177800	1.12777e-07
177900	1.14771e-07
178000	1.07815e-07
178100	1.12567e-07
178200	1.15206e-07
178300	1.16797e-07
178400	1.13132e-07
178500	1.09205e-07
178600	1.06049e-07
178700	1.1236e-07
178800	1.10053e-07
178900	1.08375e-07
179000	1.07679e-07
179100	1.16297e-07
179200	1.18969e-07
179300	1.07229e-07
179400	1.11645e-07
179500	1.14868e-07
179600	1.72313e-07
179700	2.47407e-06
179800	3.06903e-06
179900	2.91805e-07
180000	1.14133e-07
180100	1.10797e-07
180200	1.07863e-07
180300	1.06285e-07
180400	1.06258e-07
180500	1.09869e-07
180600	1.13251e-07
180700	1.05984e-07
180800	1.12889e-07
180900	1.19078e-07
181000	1.20771e-07
181100	1.15368e-07
181200	1.1203e-07
181300	1.12094e-07
181400	1.16059e-07
181500	1.2026e-07
181600	1.17354e-07
181700	1.15367e-07
181800	1.1322e-07
181900	1.12691e-07
182000	1.14399e-07
182100	1.05825e-07
182200	1.07194e-07
182300	1.19358e-07
182400	1.14999e-07
182500	1.10216e-07
182600	1.09018e-07
182700	1.14706e-07
182800	1.12878e-07
182900	1.05029e-07
183000	1.07223e-07
183100	1.16735e-07
183200	1.18e-07
183300	1.17326e-07
183400	1.09814e-07
183500	1.05045e-07
183600	1.1108e-07
183700	1.08179e-07
183800	1.06524e-07
183900	1.12217e-07
184000	1.14392e-07
184100	1.10894e-07
184200	1.10793e-07
184300	1.17346e-07
184400	1.15732e-07
184500	1.13123e-07
184600	1.07779e-07
184700	1.08208e-07
184800	1.14769e-07
184900	1.12571e-07
185000	1.47101e-07
185100	1.85253e-07
185200	1.16271e-07
185300	1.12055e-07
185400	1.15779e-07
185500	1.13495e-07
185600	1.13264e-07
185700	1.17279e-07
185800	1.14984e-07
185900	1.1723e-07
186000	1.10741e-07
186100	1.07906e-07
186200	1.09022e-07
186300	1.05028e-07
186400	1.09891e-07
186500	1.15959e-07
186600	1.12294e-07
186700	1.05428e-07
186800	1.051e-07
186900	1.12159e-07
187000	1.15776e-07
187100	1.21437e-07
187200	1.13298e-07
187300	1.05767e-07
187400	1.07415e-07
187500	1.12021e-07
187600	1.11887e-07
187700	1.1224e-07
187800	1.14213e-07
187900	1.15482e-07
188000	1.11087e-07
188100	1.09146e-07
188200	1.11036e-07
188300	1.14228e-07
188400	1.15835e-07
188500	1.12111e-07
188600	1.11745e-07
188700	1.14457e-07
188800	1.17464e-07
188900	1.12717e-07
189000	1.11026e-07
189100	1.07147e-07
189200	1.145e-07
189300	1.22565e-07
189400	1.18069e-07
189500	1.08662e-07
189600	1.05669e-07
189700	1.10717e-07
189800	1.07107e-07
189900	1.12277e-07
190000	1.11235e-07
190100	1.0552e-07
190200	1.1124e-07
190300	1.101e-07
190400	1.07128e-07
190500	1.13503e-07
190600	1.11156e-07
190700	1.09178e-07
190800	1.08931e-07
190900	1.11459e-07
191000	1.09477e-07
191100	1.06e-07
191200	1.16134e-07
191300	1.26939e-07
191400	1.12059e-07
191500	1.12625e-07
191600	1.16435e-07
191700	1.15271e-07
191800	1.11996e-07
191900	1.15958e-07
192000	1.20281e-07
192100	1.18465e-07
192200	1.13465e-07
192300	1.08816e-07
192400	1.13542e-07
192500	1.08542e-07
192600	1.10797e-07
192700	1.15936e-07
192800	1.19481e-07
192900	1.12139e-07
193000	1.10977e-07
193100	1.1695e-07
193200	1.13758e-07
193300	1.15651e-07
193400	1.21071e-07
193500	1.09829e-07
193600	1.05856e-07
193700	1.05315e-07
193800	1.10524e-07
193900	1.12137e-07
194000	1.13849e-07
194100	1.10519e-07
194200	1.01528e-07
194300	1.06604e-07
194400	1.09654e-07
194500	1.09674e-07
194600	1.08768e-07
194700	1.05443e-07
194800	1.03927e-07
194900	1.08977e-07
195000	1.15917e-07
195100	1.16411e-07
195200	1.19567e-07
195300	1.21401e-07
195400	1.08913e-07
195500	1.04779e-07
195600	1.10337e-07
195700	1.1494e-07
195800	1.10717e-07
195900	1.1135e-07
196000	1.07076e-07
196100	1.09946e-07
196200	1.15515e-07
196300	1.15105e-07
196400	1.12737e-07
196500	1.01592e-07
196600	9.95323e-08
196700	1.085e-07
196800	1.11799e-07
196900	1.10323e-07
197000	1.12395e-07
197100	1.08858e-07
197200	1.04404e-07
197300	1.11905e-07
197400	1.1678e-07
197500	1.10306e-07
197600	1.08065e-07
197700	1.11669e-07
197800	1.12986e-07
197900	1.12033e-07
198000	1.08379e-07
198100	1.06621e-07
198200	1.15519e-07
198300	1.18894e-07
198400	1.18914e-07
198500	1.14618e-07
198600	1.11794e-07
198700	1.0471e-07
198800	9.83964e-08
198900	1.05335e-07
199000	1.122e-07
199100	1.17916e-07
199200	1.13546e-07
199300	1.14018e-07
199400	1.08978e-07
199500	1.10149e-07
199600	1.11126e-07
199700	1.08471e-07
[truncated: 1,003 more rows]

## Sheet: Sheet6
300K_60S
Freq(Hz)	Sv (arb.)
0	6.81545e-07
100	9.09864e-07
200	8.98743e-07
300	2.52485e-07
400	2.35511e-07
500	1.95615e-07
600	1.8125e-07
700	1.67675e-07
800	1.44401e-07
900	1.37596e-07
1000	1.28587e-07
1100	1.24846e-07
1200	1.29965e-07
1300	1.28839e-07
1400	1.29873e-07
1500	1.18278e-07
1600	1.1241e-07
1700	1.1961e-07
1800	1.2394e-07
1900	1.1927e-07
2000	1.18844e-07
2100	1.23166e-07
2200	1.1671e-07
2300	1.1712e-07
2400	1.19857e-07
2500	1.23658e-07
2600	1.2151e-07
2700	1.30949e-07
2800	1.28801e-07
2900	1.21013e-07
3000	1.2114e-07
3100	1.23065e-07
3200	1.22803e-07
3300	1.22137e-07
3400	1.25896e-07
3500	1.26431e-07
3600	1.25119e-07
3700	1.17549e-07
3800	1.123e-07
3900	1.14464e-07
4000	1.16735e-07
4100	1.17599e-07
4200	1.12351e-07
4300	1.14509e-07
4400	1.25741e-07
4500	1.23264e-07
4600	1.17321e-07
4700	1.14469e-07
4800	1.19015e-07
4900	1.24218e-07
5000	1.23647e-07
5100	1.14115e-07
5200	1.18672e-07
5300	1.25098e-07
5400	1.2858e-07
5500	1.26683e-07
5600	1.23717e-07
5700	1.18197e-07
5800	1.16205e-07
5900	1.12731e-07
6000	1.11408e-07
6100	1.15577e-07
6200	1.16452e-07
6300	1.17671e-07
6400	1.23706e-07
6500	1.21688e-07
6600	1.1903e-07
6700	1.19627e-07
6800	1.20695e-07
6900	1.18698e-07
7000	1.16644e-07
7100	1.19436e-07
7200	1.18048e-07
7300	1.1686e-07
7400	1.18451e-07
7500	1.16282e-07
7600	1.17001e-07
7700	1.16204e-07
7800	1.14782e-07
7900	1.16756e-07
8000	1.12373e-07
8100	1.09944e-07
8200	1.16958e-07
8300	1.18123e-07
8400	1.15041e-07
8500	1.17284e-07
8600	1.14484e-07
8700	1.17373e-07
8800	1.2381e-07
8900	1.17181e-07
9000	1.14238e-07
9100	1.16389e-07
9200	1.16788e-07
9300	1.13402e-07
9400	1.1524e-07
9500	1.24554e-07
9600	1.1961e-07
9700	1.21294e-07
9800	1.17974e-07
9900	1.18708e-07
10000	1.13446e-07
10100	1.15128e-07
10200	1.18367e-07
10300	1.15931e-07
10400	1.19822e-07
10500	1.167e-07
10600	1.15495e-07
10700	1.20153e-07
10800	1.152e-07
10900	1.1183e-07
11000	1.18624e-07
11100	1.18294e-07
11200	1.20544e-07
11300	1.18181e-07
11400	1.12995e-07
11500	1.1576e-07
11600	1.2216e-07
11700	1.20192e-07
11800	1.212e-07
11900	1.18682e-07
12000	1.16654e-07
12100	1.18651e-07
12200	1.16793e-07
12300	1.14659e-07
12400	1.17953e-07
12500	1.21351e-07
12600	1.14107e-07
12700	1.11901e-07
12800	1.2272e-07
12900	1.16949e-07
13000	1.13355e-07
13100	1.22797e-07
13200	1.23876e-07
13300	1.21948e-07
13400	1.19558e-07
13500	1.16347e-07
13600	1.187e-07
13700	1.15356e-07
13800	1.1152e-07
13900	1.20449e-07
14000	1.2286e-07
14100	1.14541e-07
14200	1.16761e-07
14300	1.16205e-07
14400	1.16644e-07
14500	1.17173e-07
14600	1.21102e-07
14700	1.14765e-07
14800	1.20417e-07
14900	1.19341e-07
15000	1.1583e-07
15100	1.22825e-07
15200	1.22486e-07
15300	1.19781e-07
15400	1.17744e-07
15500	1.15816e-07
15600	1.16136e-07
15700	1.20302e-07
15800	1.18986e-07
15900	1.17613e-07
16000	1.19446e-07
16100	1.20239e-07
16200	1.20259e-07
16300	1.21914e-07
16400	1.21955e-07
16500	1.19908e-07
16600	1.23287e-07
16700	1.23999e-07
16800	1.20369e-07
16900	1.22122e-07
17000	1.21679e-07
17100	1.21108e-07
17200	1.16779e-07
17300	1.20616e-07
17400	1.22159e-07
17500	1.16265e-07
17600	1.15651e-07
17700	1.13256e-07
17800	1.13554e-07
17900	1.21444e-07
18000	1.26583e-07
18100	1.13501e-07
18200	1.13239e-07
18300	1.19192e-07
18400	1.1516e-07
18500	1.08889e-07
18600	1.10357e-07
18700	1.18141e-07
18800	1.17157e-07
18900	1.17003e-07
19000	1.18105e-07
19100	1.21967e-07
19200	1.21612e-07
19300	1.13999e-07
19400	1.14181e-07
19500	1.16153e-07
19600	1.16559e-07
19700	1.14164e-07
19800	1.15687e-07
19900	1.15854e-07
20000	1.19895e-07
20100	1.18684e-07
20200	1.2166e-07
20300	1.20485e-07
20400	1.17115e-07
20500	1.14321e-07
20600	1.1554e-07
20700	1.20988e-07
20800	1.19832e-07
20900	1.16483e-07
21000	1.17633e-07
21100	1.19692e-07
21200	1.22209e-07
21300	1.25162e-07
21400	1.25907e-07
21500	1.26296e-07
21600	1.23628e-07
21700	1.12571e-07
21800	1.17244e-07
21900	1.22834e-07
22000	1.19691e-07
22100	1.18452e-07
22200	1.18829e-07
22300	1.1936e-07
22400	1.17627e-07
22500	1.18479e-07
22600	1.17462e-07
22700	1.17859e-07
22800	1.12845e-07
22900	1.16047e-07
23000	1.12912e-07
23100	1.1462e-07
23200	1.20207e-07
23300	1.21668e-07
23400	1.20075e-07
23500	1.21023e-07
23600	1.18925e-07
23700	1.20269e-07
23800	1.1656e-07
23900	1.18284e-07
24000	1.18119e-07
24100	1.173e-07
24200	1.15296e-07
24300	1.17605e-07
24400	1.19316e-07
24500	1.1619e-07
24600	1.16015e-07
24700	1.20025e-07
24800	1.13673e-07
24900	1.13673e-07
25000	1.19366e-07
25100	1.20582e-07
25200	1.17681e-07
25300	1.19561e-07
25400	1.15596e-07
25500	1.12385e-07
25600	1.2209e-07
25700	1.21382e-07
25800	1.18642e-07
25900	1.15946e-07
26000	1.16866e-07
26100	1.19445e-07
26200	1.18771e-07
26300	1.1903e-07
26400	1.15414e-07
26500	1.15912e-07
26600	1.13419e-07
26700	1.1382e-07
26800	1.15025e-07
26900	1.17703e-07
27000	1.20406e-07
27100	1.22488e-07
27200	1.21959e-07
27300	1.2544e-07
27400	1.24892e-07
27500	1.20916e-07
27600	1.20876e-07
27700	1.21079e-07
27800	1.2167e-07
27900	1.18836e-07
28000	1.19656e-07
28100	1.16607e-07
28200	1.10994e-07
28300	1.16392e-07
28400	1.20719e-07
28500	1.2178e-07
28600	1.18362e-07
28700	1.17044e-07
28800	1.16564e-07
28900	1.18523e-07
29000	1.17939e-07
29100	1.19472e-07
29200	1.15941e-07
29300	1.16131e-07
29400	1.17047e-07
29500	1.13304e-07
29600	1.20109e-07
29700	1.18843e-07
29800	1.21834e-07
29900	1.17224e-07
30000	1.12758e-07
30100	1.17062e-07
30200	1.20177e-07
30300	1.19618e-07
30400	1.17135e-07
30500	1.20546e-07
30600	1.20521e-07
30700	1.1596e-07
30800	1.13163e-07
30900	1.17266e-07
31000	1.20292e-07
31100	1.18389e-07
31200	1.15763e-07
31300	1.17531e-07
31400	1.17411e-07
31500	1.10893e-07
31600	1.14284e-07
31700	1.19727e-07
31800	1.19064e-07
31900	1.17585e-07
32000	1.21484e-07
32100	1.22787e-07
32200	1.21881e-07
32300	1.2071e-07
32400	1.17529e-07
32500	1.20754e-07
32600	1.24469e-07
32700	1.17887e-07
32800	1.17664e-07
32900	1.11856e-07
33000	1.17485e-07
33100	1.20745e-07
33200	1.17193e-07
33300	1.18944e-07
33400	1.23331e-07
33500	1.25048e-07
33600	1.22014e-07
33700	1.14238e-07
33800	1.17297e-07
33900	1.15708e-07
34000	1.18403e-07
34100	1.21041e-07
34200	1.21125e-07
34300	1.19378e-07
34400	1.15619e-07
34500	1.14774e-07
34600	1.1644e-07
34700	1.18816e-07
34800	1.21182e-07
34900	1.21127e-07
35000	1.17711e-07
35100	1.19765e-07
35200	1.22365e-07
35300	1.21738e-07
35400	1.24731e-07
35500	1.17831e-07
35600	1.12627e-07
35700	1.12339e-07
35800	1.18464e-07
35900	1.1586e-07
36000	1.14776e-07
36100	1.19477e-07
36200	1.1718e-07
36300	1.14034e-07
36400	1.15233e-07
36500	1.19091e-07
36600	1.23511e-07
36700	1.18718e-07
36800	1.20054e-07
36900	2.26454e-06
37000	1.42374e-05
37100	5.73315e-06
37200	1.35824e-07
37300	1.2182e-07
37400	1.18815e-07
37500	1.18133e-07
37600	1.20273e-07
37700	1.24144e-07
37800	1.25366e-07
37900	1.22707e-07
38000	1.21288e-07
38100	1.194e-07
38200	1.21235e-07
38300	1.25069e-07
38400	1.20053e-07
38500	1.18545e-07
38600	1.12382e-07
38700	1.10337e-07
38800	1.15646e-07
38900	1.17628e-07
39000	1.19673e-07
39100	1.18947e-07
39200	1.1613e-07
39300	1.18856e-07
39400	1.22595e-07
39500	1.16671e-07
39600	1.16953e-07
39700	1.17464e-07
39800	1.2097e-07
39900	1.18016e-07
40000	1.12775e-07
40100	1.19316e-07
40200	1.16561e-07
40300	1.17966e-07
40400	1.18864e-07
40500	1.23496e-07
40600	1.23465e-07
40700	1.17191e-07
40800	1.18341e-07
40900	1.23102e-07
41000	1.22046e-07
41100	1.21363e-07
41200	1.23096e-07
41300	1.30761e-07
41400	1.5421e-07
41500	3.16864e-07
41600	9.39524e-07
41700	2.72611e-06
41800	5.70885e-06
41900	6.58238e-06
42000	3.61477e-06
42100	6.49063e-06
42200	1.03454e-05
42300	2.53409e-05
42400	1.86098e-05
42500	8.66572e-06
42600	1.33108e-05
42700	8.4129e-06
42800	2.09625e-06
42900	4.13224e-07
43000	1.63067e-07
43100	1.33209e-07
43200	1.23374e-07
43300	2.16291e-07
43400	2.74256e-07
43500	1.35063e-07
43600	1.19527e-07
43700	1.20312e-07
43800	1.19263e-07
43900	1.20549e-07
44000	1.15196e-07
44100	1.35583e-07
44200	1.70948e-07
44300	1.22174e-07
44400	1.21311e-07
44500	1.13965e-07
44600	1.12124e-07
44700	1.18894e-07
44800	1.25383e-07
44900	2.54424e-07
45000	2.6586e-07
45100	1.2497e-07
45200	1.18879e-07
45300	1.18492e-07
45400	1.15802e-07
45500	1.18401e-07
45600	1.22792e-07
45700	1.16709e-07
45800	1.17474e-07
45900	1.1805e-07
46000	1.13793e-07
46100	1.16667e-07
46200	1.16682e-07
46300	1.1455e-07
46400	1.1473e-07
46500	1.20514e-07
46600	1.18355e-07
46700	1.16024e-07
46800	1.19815e-07
46900	1.18344e-07
47000	1.28819e-07
47100	1.22722e-07
47200	1.18434e-07
47300	1.2161e-07
47400	1.2074e-07
47500	1.17392e-07
47600	1.15149e-07
47700	1.18588e-07
47800	1.18838e-07
47900	1.17332e-07
48000	1.14804e-07
48100	1.15691e-07
48200	1.14579e-07
48300	1.19585e-07
48400	1.20266e-07
48500	1.19619e-07
48600	1.15373e-07
48700	1.17692e-07
48800	1.2007e-07
48900	1.16885e-07
49000	1.20149e-07
49100	1.17943e-07
49200	1.18908e-07
49300	1.24801e-07
49400	1.20295e-07
49500	1.18478e-07
49600	1.18129e-07
49700	1.16959e-07
49800	1.17936e-07
49900	1.1643e-07
50000	1.21078e-07
50100	1.21144e-07
50200	1.23489e-07
50300	1.22597e-07
50400	1.2349e-07
50500	1.24628e-07
50600	1.25873e-07
50700	1.29444e-07
50800	1.29794e-07
50900	1.2248e-07
51000	1.19892e-07
51100	1.28758e-07
51200	1.28987e-07
51300	1.27598e-07
51400	1.2491e-07
51500	1.25559e-07
51600	1.23442e-07
51700	1.2771e-07
51800	1.26633e-07
51900	1.2096e-07
52000	1.2228e-07
52100	1.21163e-07
52200	1.16817e-07
52300	1.15451e-07
52400	1.20018e-07
52500	1.16969e-07
52600	1.19022e-07
52700	1.1426e-07
52800	1.12224e-07
52900	1.16735e-07
53000	1.18614e-07
53100	1.17856e-07
53200	1.1688e-07
53300	1.14783e-07
53400	1.16339e-07
53500	1.1631e-07
53600	1.16444e-07
53700	1.18726e-07
53800	1.16663e-07
53900	1.14868e-07
54000	1.21561e-07
54100	1.23005e-07
54200	1.21885e-07
54300	1.19574e-07
54400	1.18055e-07
54500	1.16626e-07
54600	1.15455e-07
54700	1.1309e-07
54800	1.18692e-07
54900	1.16398e-07
55000	1.1573e-07
55100	1.18129e-07
55200	1.15115e-07
55300	1.14471e-07
55400	1.22434e-07
55500	1.18291e-07
55600	1.1729e-07
55700	1.21265e-07
55800	1.19806e-07
55900	1.20307e-07
56000	1.17425e-07
56100	1.1942e-07
56200	1.22661e-07
56300	1.19347e-07
56400	1.17663e-07
56500	1.20339e-07
56600	1.17424e-07
56700	1.21073e-07
56800	1.20971e-07
56900	1.1639e-07
57000	1.15493e-07
57100	1.19758e-07
57200	1.19635e-07
57300	1.17647e-07
57400	1.18771e-07
57500	1.17219e-07
57600	1.15234e-07
57700	1.1666e-07
57800	1.15385e-07
57900	1.18013e-07
58000	1.20987e-07
58100	1.18095e-07
58200	1.20192e-07
58300	1.23e-07
58400	1.1898e-07
58500	1.12351e-07
58600	1.14757e-07
58700	1.19147e-07
58800	1.21817e-07
58900	1.19239e-07
59000	1.17627e-07
59100	1.19335e-07
59200	1.1956e-07
59300	1.26032e-07
59400	1.22841e-07
59500	1.19811e-07
59600	1.21592e-07
59700	1.41846e-07
59800	4.74005e-06
59900	3.39608e-05
60000	1.47809e-05
60100	1.88926e-07
60200	1.22109e-07
60300	1.2236e-07
60400	1.21548e-07
60500	1.19449e-07
60600	1.19825e-07
60700	1.18723e-07
60800	1.19495e-07
60900	1.19855e-07
61000	1.19523e-07
61100	1.18632e-07
61200	1.17176e-07
61300	1.19372e-07
61400	1.19813e-07
61500	1.16243e-07
61600	1.17777e-07
61700	1.14153e-07
61800	1.15789e-07
61900	1.18436e-07
62000	1.16233e-07
62100	1.17188e-07
62200	1.17821e-07
62300	1.15921e-07
62400	1.17484e-07
62500	1.15652e-07
62600	1.15018e-07
62700	1.21645e-07
62800	1.2259e-07
62900	1.19346e-07
63000	1.25781e-07
63100	1.23431e-07
63200	1.18427e-07
63300	1.21014e-07
63400	1.15634e-07
63500	1.13702e-07
63600	1.17822e-07
63700	1.24737e-07
63800	1.21262e-07
63900	1.21171e-07
64000	1.2617e-07
64100	1.22457e-07
64200	1.22081e-07
64300	1.2202e-07
64400	1.22109e-07
64500	1.18679e-07
64600	1.20747e-07
64700	1.22659e-07
64800	1.20014e-07
64900	1.168e-07
65000	1.11262e-07
65100	1.15469e-07
65200	1.17941e-07
65300	1.16308e-07
65400	1.19564e-07
65500	1.1947e-07
65600	1.19541e-07
65700	1.13458e-07
65800	1.12699e-07
65900	1.23865e-07
66000	1.21166e-07
66100	1.23242e-07
66200	1.25132e-07
66300	1.31137e-07
66400	1.28535e-07
66500	1.27189e-07
66600	1.24503e-07
66700	1.23395e-07
66800	1.28899e-07
66900	1.34406e-07
67000	1.43879e-07
67100	1.78443e-07
67200	2.84373e-07
67300	2.59989e-07
67400	1.78809e-07
67500	1.38644e-07
67600	1.20188e-07
67700	1.23762e-07
67800	1.84326e-07
67900	2.47002e-07
68000	3.40254e-07
68100	4.40733e-07
68200	7.72761e-07
68300	4.93445e-06
68400	4.58452e-06
68500	2.05035e-06
68600	6.32951e-07
68700	3.28607e-07
68800	1.74918e-07
68900	1.66083e-07
69000	1.41637e-07
69100	1.27984e-07
69200	1.3911e-07
69300	1.3941e-07
69400	1.32459e-07
69500	1.26868e-07
69600	1.18083e-07
69700	1.20142e-07
69800	1.26512e-07
69900	1.24431e-07
70000	1.24273e-07
70100	1.27025e-07
70200	1.25166e-07
70300	1.2304e-07
70400	1.22465e-07
70500	1.20521e-07
70600	1.20419e-07
70700	1.20344e-07
70800	1.16942e-07
70900	1.16399e-07
71000	1.14358e-07
71100	1.19013e-07
71200	1.20686e-07
71300	1.2315e-07
71400	1.20792e-07
71500	1.22025e-07
71600	1.19427e-07
71700	1.16914e-07
71800	1.1433e-07
71900	1.19781e-07
72000	1.20236e-07
72100	1.20424e-07
72200	1.18191e-07
72300	1.1995e-07
72400	1.15029e-07
72500	1.17677e-07
72600	1.23485e-07
72700	1.21447e-07
72800	1.19967e-07
72900	1.15698e-07
73000	1.15231e-07
73100	1.15402e-07
73200	1.1795e-07
73300	1.15329e-07
73400	1.16517e-07
73500	1.17439e-07
73600	1.20152e-07
73700	1.20003e-07
73800	1.24549e-07
73900	3.38855e-07
74000	2.68406e-06
74100	1.69642e-06
74200	1.46065e-07
74300	1.18982e-07
74400	1.1429e-07
74500	1.16779e-07
74600	1.21959e-07
74700	1.18904e-07
74800	1.21085e-07
74900	1.21698e-07
75000	1.19761e-07
75100	1.18663e-07
75200	1.15796e-07
75300	1.11693e-07
75400	1.14459e-07
75500	1.18519e-07
75600	1.20466e-07
75700	1.159e-07
75800	1.18691e-07
75900	1.14437e-07
76000	1.11761e-07
76100	1.11921e-07
76200	1.13472e-07
76300	1.14868e-07
76400	1.11415e-07
76500	1.20854e-07
76600	1.22091e-07
76700	1.15965e-07
76800	1.14839e-07
76900	1.13651e-07
77000	1.15387e-07
77100	1.17628e-07
77200	1.18237e-07
77300	1.18184e-07
77400	1.18869e-07
77500	1.18269e-07
77600	1.20938e-07
77700	1.19462e-07
77800	1.20044e-07
77900	1.15643e-07
78000	1.16023e-07
78100	1.19697e-07
78200	1.19815e-07
78300	1.23572e-07
78400	1.24064e-07
78500	1.21085e-07
78600	1.15911e-07
78700	1.13871e-07
78800	1.12093e-07
78900	1.1181e-07
79000	1.13295e-07
79100	1.18824e-07
79200	1.18516e-07
79300	1.17861e-07
79400	1.16752e-07
79500	1.17401e-07
79600	1.1972e-07
79700	1.20245e-07
79800	1.1829e-07
79900	1.18835e-07
80000	1.2204e-07
80100	1.21249e-07
80200	1.20985e-07
80300	1.21107e-07
80400	1.22184e-07
80500	1.19373e-07
80600	1.14932e-07
80700	1.18323e-07
80800	1.2029e-07
80900	1.21361e-07
81000	1.2079e-07
81100	1.18757e-07
81200	1.12937e-07
81300	1.15787e-07
81400	1.20991e-07
81500	1.20382e-07
81600	1.19855e-07
81700	1.13696e-07
81800	1.1032e-07
81900	1.17801e-07
82000	1.20262e-07
82100	1.21994e-07
82200	1.22301e-07
82300	1.20036e-07
82400	1.18838e-07
82500	1.17179e-07
82600	1.1932e-07
82700	1.26506e-07
82800	1.27512e-07
82900	1.21816e-07
83000	1.2092e-07
83100	1.20521e-07
83200	1.25265e-07
83300	1.31674e-07
83400	1.44889e-07
83500	1.60561e-07
83600	1.86402e-07
83700	1.67475e-07
83800	1.32197e-07
83900	1.42256e-07
84000	1.6776e-07
84100	1.55706e-07
84200	1.62194e-07
84300	1.67653e-07
84400	1.84621e-07
84500	2.2635e-07
84600	3.01827e-07
84700	3.21416e-07
84800	2.2631e-07
84900	1.77744e-07
85000	1.59618e-07
85100	1.6138e-07
85200	1.82919e-07
85300	2.11134e-07
85400	1.71294e-07
85500	1.39486e-07
85600	1.21137e-07
85700	1.17948e-07
85800	1.21072e-07
85900	1.1676e-07
86000	1.1971e-07
86100	1.18788e-07
86200	1.14695e-07
86300	1.13511e-07
86400	1.16891e-07
86500	1.189e-07
86600	1.20461e-07
86700	1.13482e-07
86800	1.15558e-07
86900	1.16438e-07
87000	1.21266e-07
87100	1.183e-07
87200	1.16401e-07
87300	1.12713e-07
87400	1.17796e-07
87500	1.19e-07
87600	1.21822e-07
87700	1.20851e-07
87800	1.18923e-07
87900	1.16346e-07
88000	1.12433e-07
88100	1.14053e-07
88200	1.19591e-07
88300	1.16824e-07
88400	1.13771e-07
88500	1.18904e-07
88600	1.18382e-07
88700	1.11881e-07
88800	1.13307e-07
88900	1.19395e-07
89000	1.20407e-07
89100	1.24961e-07
89200	1.22367e-07
89300	1.1438e-07
89400	1.16626e-07
89500	1.1988e-07
89600	1.15603e-07
89700	1.13989e-07
89800	1.17422e-07
89900	1.15737e-07
90000	1.13335e-07
90100	1.18713e-07
90200	1.23479e-07
90300	1.19669e-07
90400	1.18626e-07
90500	1.1651e-07
90600	1.1812e-07
90700	1.2407e-07
90800	1.1899e-07
90900	1.19619e-07
91000	1.24784e-07
91100	1.23452e-07
91200	1.19435e-07
91300	1.16829e-07
91400	1.15278e-07
91500	1.18149e-07
91600	1.21146e-07
91700	1.15475e-07
91800	1.15321e-07
91900	1.14734e-07
92000	1.16175e-07
92100	1.21062e-07
92200	1.19036e-07
92300	1.13251e-07
92400	1.15097e-07
92500	1.13631e-07
92600	1.18343e-07
92700	1.2098e-07
92800	1.2016e-07
92900	1.19995e-07
93000	1.19261e-07
93100	1.16101e-07
93200	1.2099e-07
93300	1.18657e-07
93400	1.11924e-07
93500	1.15064e-07
93600	1.16966e-07
93700	1.22217e-07
93800	1.19997e-07
93900	1.16735e-07
94000	1.16542e-07
94100	1.18577e-07
94200	1.20336e-07
94300	1.18851e-07
94400	1.18489e-07
94500	1.23926e-07
94600	1.20926e-07
94700	1.16756e-07
94800	1.1615e-07
94900	1.17053e-07
95000	1.16469e-07
95100	1.18506e-07
95200	1.16458e-07
95300	1.14251e-07
95400	1.1588e-07
95500	1.16771e-07
95600	1.15626e-07
95700	1.15963e-07
95800	1.17904e-07
95900	1.21387e-07
96000	1.20391e-07
96100	1.17369e-07
96200	1.24015e-07
96300	1.21909e-07
96400	1.20734e-07
96500	1.1579e-07
96600	1.1642e-07
96700	1.18519e-07
96800	1.16632e-07
96900	1.16855e-07
97000	1.12859e-07
97100	1.11739e-07
97200	1.13288e-07
97300	1.16273e-07
97400	1.17495e-07
97500	1.219e-07
97600	1.26317e-07
97700	1.22045e-07
97800	1.19295e-07
97900	1.18806e-07
98000	1.20449e-07
98100	1.18626e-07
98200	1.1774e-07
98300	1.20901e-07
98400	1.2367e-07
98500	1.21055e-07
98600	1.17832e-07
98700	1.226e-07
98800	1.22394e-07
98900	1.19323e-07
99000	1.20275e-07
99100	1.18216e-07
99200	1.19199e-07
99300	1.18086e-07
99400	1.19361e-07
99500	1.18293e-07
99600	1.14634e-07
99700	1.17381e-07
99800	1.20847e-07
99900	1.21746e-07
100000	1.2339e-07
100100	1.2261e-07
100200	1.20296e-07
100300	1.21124e-07
100400	1.20904e-07
100500	1.22569e-07
100600	1.20925e-07
100700	1.27178e-07
100800	1.20649e-07
100900	1.22804e-07
101000	1.19194e-07
101100	1.17952e-07
101200	1.24518e-07
101300	1.21632e-07
101400	1.22601e-07
101500	1.18316e-07
101600	1.19994e-07
101700	1.22268e-07
101800	1.19017e-07
101900	1.2088e-07
102000	1.20993e-07
102100	1.16474e-07
102200	1.17906e-07
102300	1.21689e-07
102400	1.20293e-07
102500	1.24173e-07
102600	1.23329e-07
102700	1.17149e-07
102800	1.12685e-07
102900	1.17038e-07
103000	1.20254e-07
103100	1.21293e-07
103200	1.21141e-07
103300	1.22093e-07
103400	1.22768e-07
103500	1.21642e-07
103600	1.21295e-07
103700	1.19487e-07
103800	1.21076e-07
103900	1.18564e-07
104000	1.1797e-07
104100	1.13614e-07
104200	1.1171e-07
104300	1.13733e-07
104400	1.12629e-07
104500	1.15397e-07
104600	1.17119e-07
104700	1.19309e-07
104800	1.17669e-07
104900	1.16667e-07
105000	1.15002e-07
105100	1.12049e-07
105200	1.11859e-07
105300	1.17249e-07
105400	1.20807e-07
105500	1.18547e-07
105600	1.1598e-07
105700	1.11911e-07
105800	1.15865e-07
105900	1.18451e-07
106000	1.19693e-07
106100	1.18086e-07
106200	1.20703e-07
106300	1.22446e-07
106400	1.19115e-07
106500	1.15592e-07
106600	1.14976e-07
106700	1.15843e-07
106800	1.16811e-07
106900	1.16084e-07
107000	1.18305e-07
107100	1.13277e-07
107200	1.1089e-07
107300	1.17403e-07
107400	1.17386e-07
107500	1.19513e-07
107600	1.15343e-07
107700	1.17313e-07
107800	1.17133e-07
107900	1.12097e-07
108000	1.14185e-07
108100	1.18784e-07
108200	1.23333e-07
108300	1.20452e-07
108400	1.10711e-07
108500	1.18996e-07
108600	1.21548e-07
108700	1.2057e-07
108800	1.20802e-07
108900	1.18395e-07
109000	1.15431e-07
109100	1.17325e-07
109200	1.17443e-07
109300	1.17076e-07
109400	1.16881e-07
109500	1.19372e-07
109600	1.18949e-07
109700	1.11904e-07
109800	1.17848e-07
109900	1.16898e-07
110000	1.15552e-07
110100	1.18574e-07
110200	1.20185e-07
110300	1.18616e-07
110400	1.1647e-07
110500	1.15698e-07
110600	1.14424e-07
110700	1.13938e-07
110800	1.16794e-07
110900	1.54941e-07
111000	9.83906e-07
111100	9.32252e-07
111200	1.46183e-07
111300	1.15066e-07
111400	1.14419e-07
111500	1.07205e-07
111600	1.11397e-07
111700	1.17723e-07
111800	1.14011e-07
111900	1.16682e-07
112000	1.15677e-07
112100	1.16017e-07
112200	1.11807e-07
112300	1.14335e-07
112400	1.18155e-07
112500	1.14034e-07
112600	1.18267e-07
112700	1.1673e-07
112800	1.14048e-07
112900	1.15629e-07
113000	1.16768e-07
113100	1.15818e-07
113200	1.14365e-07
113300	1.15797e-07
113400	1.17544e-07
113500	1.12767e-07
113600	1.132e-07
113700	1.14626e-07
113800	1.14303e-07
113900	1.15035e-07
114000	1.12352e-07
114100	1.09596e-07
114200	1.11924e-07
114300	1.13451e-07
114400	1.16961e-07
114500	1.21972e-07
114600	1.17079e-07
114700	1.11905e-07
114800	1.14551e-07
114900	1.15107e-07
115000	1.15501e-07
115100	1.16616e-07
115200	1.13282e-07
115300	1.08705e-07
115400	1.10254e-07
115500	1.18059e-07
115600	1.15443e-07
115700	1.1416e-07
115800	1.16871e-07
115900	1.20592e-07
116000	1.23192e-07
116100	1.1817e-07
116200	1.16434e-07
116300	1.16297e-07
116400	1.13164e-07
116500	1.11919e-07
116600	1.20337e-07
116700	1.18849e-07
116800	1.17705e-07
116900	1.11981e-07
117000	1.17216e-07
117100	1.19706e-07
117200	1.17795e-07
117300	1.14872e-07
117400	1.10133e-07
117500	1.10406e-07
117600	1.11264e-07
117700	1.18342e-07
117800	1.15533e-07
117900	1.17045e-07
118000	1.19888e-07
118100	1.16363e-07
118200	1.12745e-07
118300	1.13721e-07
118400	1.19837e-07
118500	1.2066e-07
118600	1.1895e-07
118700	1.13734e-07
118800	1.14335e-07
118900	1.15921e-07
119000	1.15486e-07
119100	1.16882e-07
119200	1.12439e-07
119300	1.19459e-07
119400	1.14484e-07
119500	1.16907e-07
119600	1.13849e-07
119700	1.18231e-07
119800	1.89953e-07
119900	1.71298e-07
120000	1.20695e-07
120100	1.13946e-07
120200	1.08924e-07
120300	1.09787e-07
120400	1.14096e-07
120500	1.17609e-07
120600	1.12318e-07
120700	1.16978e-07
120800	1.21284e-07
120900	1.13923e-07
121000	1.13615e-07
121100	1.13994e-07
121200	1.13737e-07
121300	1.12931e-07
121400	1.13457e-07
121500	1.16105e-07
121600	1.19815e-07
121700	1.24218e-07
121800	1.18428e-07
121900	1.19869e-07
122000	1.21316e-07
122100	1.20132e-07
122200	1.13596e-07
122300	1.10673e-07
122400	1.13473e-07
122500	1.18288e-07
122600	1.19806e-07
122700	1.1894e-07
122800	1.13747e-07
122900	1.12093e-07
123000	1.17033e-07
123100	1.1481e-07
123200	1.16313e-07
123300	1.14493e-07
123400	1.17242e-07
123500	1.22989e-07
123600	1.16625e-07
123700	1.15108e-07
123800	1.18382e-07
123900	1.21696e-07
124000	1.19943e-07
124100	1.14364e-07
124200	1.14771e-07
124300	1.18501e-07
124400	1.19807e-07
124500	1.18112e-07
124600	1.16417e-07
124700	1.23249e-07
124800	1.28747e-07
124900	1.57499e-07
125000	2.30981e-07
125100	3.6961e-07
125200	5.86332e-07
125300	7.80614e-07
125400	7.71743e-07
125500	4.86575e-07
125600	2.31098e-07
125700	3.82373e-07
125800	6.25758e-07
125900	4.28892e-07
126000	3.88514e-07
126100	6.39207e-07
126200	4.57839e-07
126300	5.99096e-07
126400	5.56909e-07
126500	6.77791e-07
126600	7.89572e-07
126700	1.21806e-06
126800	2.06694e-06
126900	2.2312e-06
127000	2.41913e-06
127100	2.76273e-06
127200	1.73358e-06
127300	8.26087e-07
127400	7.59505e-07
127500	8.64088e-07
127600	7.53799e-07
127700	9.61918e-07
127800	6.94317e-07
127900	1.25158e-06
128000	1.71685e-06
128100	1.19009e-06
128200	5.46898e-07
128300	2.31209e-07
128400	1.48452e-07
128500	1.26313e-07
128600	1.2185e-07
128700	1.19304e-07
128800	1.1578e-07
128900	1.15759e-07
129000	1.19588e-07
129100	1.1654e-07
129200	1.14695e-07
129300	1.18262e-07
129400	1.17547e-07
129500	1.12821e-07
129600	1.1229e-07
129700	1.14563e-07
129800	1.14346e-07
129900	1.14416e-07
130000	1.16653e-07
130100	1.15298e-07
130200	1.15778e-07
130300	1.16077e-07
130400	1.1629e-07
130500	1.19831e-07
130600	1.15025e-07
130700	1.14654e-07
130800	1.2074e-07
130900	1.19023e-07
131000	1.16062e-07
131100	1.15637e-07
131200	1.14788e-07
131300	1.16021e-07
131400	1.14886e-07
131500	1.14928e-07
131600	1.13431e-07
131700	1.11146e-07
131800	1.13938e-07
131900	1.14581e-07
132000	1.11276e-07
132100	1.11755e-07
132200	1.14325e-07
132300	1.15766e-07
132400	1.15626e-07
132500	1.14285e-07
132600	1.16059e-07
132700	1.155e-07
132800	1.13177e-07
132900	1.15714e-07
133000	1.16652e-07
133100	1.12728e-07
133200	1.1269e-07
133300	1.08358e-07
133400	1.13255e-07
133500	1.12612e-07
133600	1.15227e-07
133700	1.16185e-07
133800	1.13615e-07
133900	1.17067e-07
134000	1.17151e-07
134100	1.15953e-07
134200	1.15867e-07
134300	1.18005e-07
134400	1.25392e-07
134500	1.15687e-07
134600	1.11733e-07
134700	1.10484e-07
134800	1.12407e-07
134900	1.11658e-07
135000	1.16913e-07
135100	1.20281e-07
135200	1.20102e-07
135300	1.15542e-07
135400	1.13494e-07
135500	1.11747e-07
135600	1.20143e-07
135700	1.19339e-07
135800	1.20722e-07
135900	1.19486e-07
136000	1.16662e-07
136100	1.17025e-07
136200	1.15313e-07
136300	1.17553e-07
136400	1.12965e-07
136500	1.12138e-07
136600	1.17433e-07
136700	1.16132e-07
136800	1.13028e-07
136900	1.12976e-07
137000	1.15914e-07
137100	1.16486e-07
137200	1.18063e-07
137300	1.15076e-07
137400	1.22528e-07
137500	1.1634e-07
137600	1.12593e-07
137700	1.15081e-07
137800	1.18722e-07
137900	1.15443e-07
138000	1.10475e-07
138100	1.12653e-07
138200	1.16278e-07
138300	1.15209e-07
138400	1.12831e-07
138500	1.14149e-07
138600	1.12416e-07
138700	1.13611e-07
138800	1.18494e-07
138900	1.17253e-07
139000	1.16686e-07
139100	1.14705e-07
139200	1.09727e-07
139300	1.09566e-07
139400	1.14625e-07
139500	1.168e-07
139600	1.15286e-07
139700	1.1186e-07
139800	1.1915e-07
139900	1.19973e-07
140000	1.15526e-07
140100	1.17288e-07
140200	1.1651e-07
140300	1.12513e-07
140400	1.17068e-07
140500	1.18312e-07
140600	1.1528e-07
140700	1.12649e-07
140800	1.18788e-07
140900	1.13809e-07
141000	1.10907e-07
141100	1.12447e-07
141200	1.13295e-07
141300	1.16489e-07
141400	1.17062e-07
141500	1.17443e-07
141600	1.18069e-07
141700	1.20543e-07
141800	1.21867e-07
141900	1.20787e-07
142000	1.21404e-07
142100	1.11142e-07
142200	1.11276e-07
142300	1.13843e-07
142400	1.12941e-07
142500	1.16229e-07
142600	1.15494e-07
142700	1.11438e-07
142800	1.10219e-07
142900	1.16828e-07
143000	1.20127e-07
143100	1.19728e-07
143200	1.1977e-07
143300	1.11554e-07
143400	1.13058e-07
143500	1.15074e-07
143600	1.11908e-07
143700	1.07704e-07
143800	1.11499e-07
143900	1.11181e-07
144000	1.14854e-07
144100	1.13292e-07
144200	1.09167e-07
144300	1.12893e-07
144400	1.12916e-07
144500	1.14114e-07
144600	1.16258e-07
144700	1.10529e-07
144800	1.14075e-07
144900	1.172e-07
145000	1.13956e-07
145100	1.10086e-07
145200	1.12873e-07
145300	1.19013e-07
145400	1.12664e-07
145500	1.10923e-07
145600	1.17056e-07
145700	1.19316e-07
145800	1.2058e-07
145900	1.17207e-07
146000	1.14693e-07
146100	1.14873e-07
146200	1.1551e-07
146300	1.15999e-07
146400	1.15143e-07
146500	1.11148e-07
146600	1.12274e-07
146700	1.14842e-07
146800	1.1286e-07
146900	1.14206e-07
147000	1.14778e-07
147100	1.15376e-07
147200	1.17053e-07
147300	1.17877e-07
147400	1.16143e-07
147500	1.17182e-07
147600	1.16954e-07
147700	1.13172e-07
147800	1.14569e-07
147900	1.1245e-07
148000	1.65427e-07
148100	1.98116e-07
148200	1.24679e-07
148300	1.16006e-07
148400	1.1288e-07
148500	1.11217e-07
148600	1.14815e-07
148700	1.16609e-07
148800	1.15123e-07
148900	1.17281e-07
149000	1.1722e-07
149100	1.12851e-07
149200	1.11863e-07
149300	1.11506e-07
149400	1.11799e-07
149500	1.16644e-07
149600	1.17177e-07
149700	1.16849e-07
149800	1.13734e-07
149900	1.17037e-07
150000	1.19792e-07
150100	1.15882e-07
150200	1.16814e-07
150300	1.17283e-07
150400	1.1071e-07
150500	1.12781e-07
150600	1.15433e-07
150700	1.11257e-07
150800	1.08512e-07
150900	1.05933e-07
151000	1.07861e-07
151100	1.12744e-07
151200	1.18717e-07
151300	1.1358e-07
151400	1.11691e-07
151500	1.14463e-07
151600	1.17695e-07
151700	1.16212e-07
151800	1.10702e-07
151900	1.1052e-07
152000	1.17585e-07
152100	1.18754e-07
152200	1.19164e-07
152300	1.15523e-07
152400	1.13971e-07
152500	1.16607e-07
152600	1.1749e-07
152700	1.21036e-07
152800	1.18018e-07
152900	1.14993e-07
153000	1.08794e-07
153100	1.13644e-07
153200	1.15239e-07
153300	1.15787e-07
153400	1.14773e-07
153500	1.14984e-07
153600	1.10014e-07
153700	1.1118e-07
153800	1.10902e-07
153900	1.1664e-07
154000	1.20042e-07
154100	1.19119e-07
154200	1.18062e-07
154300	1.19784e-07
154400	1.22792e-07
154500	1.15618e-07
154600	1.17375e-07
154700	1.19655e-07
154800	1.13368e-07
154900	1.1558e-07
155000	1.12411e-07
155100	1.15089e-07
155200	1.13437e-07
155300	1.1852e-07
155400	1.1802e-07
155500	1.15245e-07
155600	1.15196e-07
155700	1.13218e-07
155800	1.11769e-07
155900	1.08724e-07
156000	1.18058e-07
156100	1.21486e-07
156200	1.20567e-07
156300	1.17363e-07
156400	1.07107e-07
156500	1.11884e-07
156600	1.16467e-07
156700	1.10951e-07
156800	1.14948e-07
156900	1.14757e-07
157000	1.14563e-07
157100	1.20863e-07
157200	1.16953e-07
157300	1.17697e-07
157400	1.16637e-07
157500	1.18018e-07
157600	1.1108e-07
157700	1.15178e-07
157800	1.1528e-07
157900	1.14843e-07
158000	1.14054e-07
158100	1.13675e-07
158200	1.1347e-07
158300	1.15079e-07
158400	1.19101e-07
158500	1.21182e-07
158600	1.1404e-07
158700	1.11137e-07
158800	1.16202e-07
158900	1.15985e-07
159000	1.09814e-07
159100	1.11298e-07
159200	1.15911e-07
159300	1.11578e-07
159400	1.08441e-07
159500	1.11778e-07
159600	1.1394e-07
159700	1.16855e-07
159800	1.17135e-07
159900	1.21094e-07
160000	1.1966e-07
160100	1.19595e-07
160200	1.18612e-07
160300	1.12895e-07
160400	1.16011e-07
160500	1.13881e-07
160600	1.13001e-07
160700	1.15521e-07
160800	1.14156e-07
160900	1.16411e-07
161000	1.13926e-07
161100	1.12164e-07
161200	1.12615e-07
161300	1.14866e-07
161400	1.15752e-07
161500	1.13779e-07
161600	1.14683e-07
161700	1.16117e-07
161800	1.15125e-07
161900	1.12279e-07
162000	1.17994e-07
162100	1.14288e-07
162200	1.10673e-07
162300	1.15466e-07
162400	1.16601e-07
162500	1.123e-07
162600	1.10304e-07
162700	1.15987e-07
162800	1.15796e-07
162900	1.09144e-07
163000	1.10881e-07
163100	1.14143e-07
163200	1.12126e-07
163300	1.11048e-07
163400	1.13466e-07
163500	1.0802e-07
163600	1.09202e-07
163700	1.09172e-07
163800	1.06978e-07
163900	1.10771e-07
164000	1.11702e-07
164100	1.12105e-07
164200	1.08024e-07
164300	1.1103e-07
164400	1.14025e-07
164500	1.12381e-07
164600	1.1283e-07
164700	1.17132e-07
164800	1.18761e-07
164900	1.15793e-07
165000	1.12639e-07
165100	1.14876e-07
165200	1.19682e-07
165300	1.154e-07
165400	1.13241e-07
165500	1.08124e-07
165600	1.14618e-07
165700	1.1626e-07
165800	1.10623e-07
165900	1.12783e-07
166000	1.15687e-07
166100	1.13601e-07
166200	1.12626e-07
166300	1.13352e-07
166400	1.14455e-07
166500	1.15443e-07
166600	1.15869e-07
166700	1.17931e-07
166800	1.24876e-07
166900	1.35692e-07
167000	1.52752e-07
167100	1.57516e-07
167200	1.37323e-07
167300	1.20676e-07
167400	1.17479e-07
167500	1.32854e-07
167600	1.38228e-07
167700	1.28732e-07
167800	1.26753e-07
167900	1.35735e-07
168000	1.26433e-07
168100	1.25023e-07
168200	1.37086e-07
168300	1.28036e-07
168400	1.34648e-07
168500	1.36365e-07
168600	1.35341e-07
168700	1.33567e-07
168800	1.46821e-07
168900	1.54182e-07
169000	1.69476e-07
169100	1.96593e-07
169200	2.13363e-07
169300	1.58555e-07
169400	2.10594e-07
169500	2.15871e-07
169600	1.55616e-07
169700	1.37418e-07
169800	1.35274e-07
169900	1.38859e-07
170000	1.38909e-07
170100	1.37723e-07
170200	1.37343e-07
170300	1.36656e-07
170400	1.3843e-07
170500	1.3331e-07
170600	1.48884e-07
170700	1.62515e-07
170800	1.45001e-07
170900	1.29907e-07
171000	1.20894e-07
171100	1.16608e-07
171200	1.13731e-07
171300	1.14612e-07
171400	1.15447e-07
171500	1.19575e-07
171600	1.19017e-07
171700	1.09224e-07
171800	1.07773e-07
171900	1.15641e-07
172000	1.12989e-07
172100	1.10752e-07
172200	1.122e-07
172300	1.13592e-07
172400	1.12282e-07
172500	1.08477e-07
172600	1.09751e-07
172700	1.15439e-07
172800	1.13457e-07
172900	1.1035e-07
173000	1.13019e-07
173100	1.13339e-07
173200	1.13494e-07
173300	1.12241e-07
173400	1.09188e-07
173500	1.15357e-07
173600	1.15923e-07
173700	1.15237e-07
173800	1.11628e-07
173900	1.13152e-07
174000	1.16604e-07
174100	1.13452e-07
174200	1.11327e-07
174300	1.08745e-07
174400	1.11689e-07
174500	1.11972e-07
174600	1.1035e-07
174700	1.12269e-07
174800	1.12022e-07
174900	1.09034e-07
175000	1.09907e-07
175100	1.13474e-07
175200	1.12246e-07
175300	1.15068e-07
175400	1.16738e-07
175500	1.16319e-07
175600	1.12494e-07
175700	1.11344e-07
175800	1.13303e-07
175900	1.13896e-07
176000	1.14776e-07
176100	1.09653e-07
176200	1.0885e-07
176300	1.14446e-07
176400	1.17377e-07
176500	1.14978e-07
176600	1.12838e-07
176700	1.0963e-07
176800	1.12111e-07
176900	1.1576e-07
177000	1.13217e-07
177100	1.10834e-07
177200	1.13316e-07
177300	1.12459e-07
177400	1.11299e-07
177500	1.08686e-07
177600	1.07937e-07
177700	1.1263e-07
177800	1.11014e-07
177900	1.12448e-07
178000	1.1215e-07
178100	1.14589e-07
178200	1.1197e-07
178300	1.14285e-07
178400	1.15629e-07
178500	1.17789e-07
178600	1.22335e-07
178700	1.15422e-07
178800	1.12523e-07
178900	1.14052e-07
179000	1.17223e-07
179100	1.17391e-07
179200	1.14094e-07
179300	1.10575e-07
179400	1.12736e-07
179500	1.1117e-07
179600	1.75953e-07
179700	2.45503e-06
179800	2.96231e-06
179900	2.74798e-07
180000	1.16383e-07
180100	1.10293e-07
180200	1.13113e-07
180300	1.13426e-07
180400	1.14702e-07
180500	1.11909e-07
180600	1.12704e-07
180700	1.15382e-07
180800	1.1004e-07
180900	1.06407e-07
181000	1.09935e-07
181100	1.1846e-07
181200	1.1097e-07
181300	1.11688e-07
181400	1.13603e-07
181500	1.13901e-07
181600	1.12816e-07
181700	1.16816e-07
181800	1.10791e-07
181900	1.12059e-07
182000	1.11117e-07
182100	1.11978e-07
182200	1.14029e-07
182300	1.13683e-07
182400	1.08969e-07
182500	1.0957e-07
182600	1.11719e-07
182700	1.13034e-07
182800	1.10714e-07
182900	1.09637e-07
183000	1.10058e-07
183100	1.16464e-07
183200	1.16821e-07
183300	1.12032e-07
183400	1.14243e-07
183500	1.13842e-07
183600	1.1048e-07
183700	1.08297e-07
183800	1.0768e-07
183900	1.11445e-07
184000	1.11874e-07
184100	1.09301e-07
184200	1.0571e-07
184300	1.13252e-07
184400	1.11548e-07
184500	1.11477e-07
184600	1.1024e-07
184700	1.06111e-07
184800	1.09527e-07
184900	1.14082e-07
185000	1.51484e-07
185100	1.95709e-07
185200	1.22347e-07
185300	1.05061e-07
185400	1.07007e-07
185500	1.1566e-07
185600	1.07911e-07
185700	1.10434e-07
185800	1.17558e-07
185900	1.17459e-07
186000	1.13033e-07
186100	1.06321e-07
186200	1.0748e-07
186300	1.02284e-07
186400	1.08272e-07
186500	1.13865e-07
186600	1.11939e-07
186700	1.11759e-07
186800	1.14358e-07
186900	1.09883e-07
187000	1.11667e-07
187100	1.12075e-07
187200	1.11838e-07
187300	1.12823e-07
187400	1.11424e-07
187500	1.12015e-07
187600	1.16023e-07
187700	1.16244e-07
187800	1.15066e-07
187900	1.14967e-07
188000	1.09965e-07
188100	1.15974e-07
188200	1.16734e-07
188300	1.15246e-07
188400	1.12604e-07
188500	1.1223e-07
188600	1.13625e-07
188700	1.11537e-07
188800	1.12088e-07
188900	1.13103e-07
189000	1.11171e-07
189100	1.15668e-07
189200	1.14652e-07
189300	1.12717e-07
189400	1.14909e-07
189500	1.14196e-07
189600	1.14931e-07
189700	1.1129e-07
189800	1.07772e-07
189900	1.09986e-07
190000	1.09957e-07
190100	1.08048e-07
190200	1.11146e-07
190300	1.15782e-07
190400	1.09785e-07
190500	1.07881e-07
190600	1.09315e-07
190700	1.09919e-07
190800	1.0801e-07
190900	1.07417e-07
191000	1.08351e-07
191100	1.09816e-07
191200	1.09094e-07
191300	1.11012e-07
191400	1.16294e-07
191500	1.14129e-07
191600	1.1375e-07
191700	1.12645e-07
191800	1.17809e-07
191900	1.189e-07
192000	1.16795e-07
192100	1.11693e-07
192200	1.09424e-07
192300	1.07393e-07
192400	1.0643e-07
192500	1.10285e-07
192600	1.16971e-07
192700	1.1179e-07
192800	1.09174e-07
192900	1.10514e-07
193000	1.11371e-07
193100	1.08622e-07
193200	1.06352e-07
193300	1.08705e-07
193400	1.18879e-07
193500	1.13984e-07
193600	1.09025e-07
193700	1.12276e-07
193800	1.13362e-07
193900	1.14667e-07
194000	1.12194e-07
194100	1.12218e-07
194200	1.11571e-07
194300	1.14056e-07
194400	1.1228e-07
194500	1.11803e-07
194600	1.09406e-07
194700	1.08549e-07
194800	1.11807e-07
194900	1.12778e-07
195000	1.11199e-07
195100	1.14498e-07
195200	1.15683e-07
195300	1.14327e-07
195400	1.1393e-07
195500	1.1017e-07
195600	1.05682e-07
195700	1.11428e-07
195800	1.10333e-07
195900	1.08714e-07
196000	1.0969e-07
196100	1.12507e-07
196200	1.07489e-07
196300	1.10219e-07
196400	1.11797e-07
196500	1.11943e-07
196600	1.1395e-07
196700	1.14195e-07
196800	1.13482e-07
196900	1.16654e-07
197000	1.13311e-07
197100	1.07473e-07
197200	1.07924e-07
197300	1.09846e-07
197400	1.08988e-07
197500	1.11412e-07
197600	1.12103e-07
197700	1.13499e-07
197800	1.11776e-07
197900	1.13397e-07
198000	1.14876e-07
198100	1.1389e-07
198200	1.10825e-07
198300	1.15132e-07
198400	1.11979e-07
198500	1.09693e-07
198600	1.07273e-07
198700	1.09577e-07
198800	1.10311e-07
198900	1.12742e-07
199000	1.11203e-07
199100	1.12621e-07
199200	1.10269e-07
199300	1.11912e-07
199400	1.10204e-07
199500	1.09305e-07
199600	1.08702e-07
199700	1.08868e-07
[truncated: 1,003 more rows]

## Sheet: Sheet7
300K_96S
Freq(Hz)	Sv (arb.)
0	4.86101e-07
100	8.30026e-07
200	9.2208e-07
300	2.54056e-07
400	2.398e-07
500	1.99614e-07
600	1.73338e-07
700	1.62407e-07
800	1.42459e-07
900	1.39078e-07
1000	1.3073e-07
1100	1.26194e-07
1200	1.25668e-07
1300	1.23555e-07
1400	1.2827e-07
1500	1.24147e-07
1600	1.23035e-07
1700	1.28483e-07
1800	1.23406e-07
1900	1.15189e-07
2000	1.19997e-07
2100	1.19845e-07
2200	1.15592e-07
2300	1.15998e-07
2400	1.22975e-07
2500	1.26674e-07
2600	1.24539e-07
2700	1.25223e-07
2800	1.18632e-07
2900	1.21643e-07
3000	1.25534e-07
3100	1.21924e-07
3200	1.20562e-07
3300	1.21936e-07
3400	1.22224e-07
3500	1.20562e-07
3600	1.17708e-07
3700	1.18529e-07
3800	1.20037e-07
3900	1.1928e-07
4000	1.19025e-07
4100	1.16069e-07
4200	1.18884e-07
4300	1.19724e-07
4400	1.21979e-07
4500	1.22834e-07
4600	1.22895e-07
4700	1.24268e-07
4800	1.20727e-07
4900	1.18923e-07
5000	1.23771e-07
5100	1.19509e-07
5200	1.17095e-07
5300	1.16101e-07
5400	1.16323e-07
5500	1.13783e-07
5600	1.14819e-07
5700	1.18534e-07
5800	1.22341e-07
5900	1.16622e-07
6000	1.15008e-07
6100	1.17211e-07
6200	1.16727e-07
6300	1.12892e-07
6400	1.11596e-07
6500	1.13726e-07
6600	1.15889e-07
6700	1.16218e-07
6800	1.19658e-07
6900	1.17063e-07
7000	1.17721e-07
7100	1.19001e-07
7200	1.18708e-07
7300	1.16006e-07
7400	1.18887e-07
7500	1.20237e-07
7600	1.17206e-07
7700	1.17096e-07
7800	1.18432e-07
7900	1.19839e-07
8000	1.19615e-07
8100	1.19552e-07
8200	1.16672e-07
8300	1.18776e-07
8400	1.21014e-07
8500	1.21407e-07
8600	1.23119e-07
8700	1.18089e-07
8800	1.14173e-07
8900	1.14158e-07
9000	1.1625e-07
9100	1.18382e-07
9200	1.22003e-07
9300	1.20397e-07
9400	1.19257e-07
9500	1.19629e-07
9600	1.20267e-07
9700	1.19051e-07
9800	1.18847e-07
9900	1.15311e-07
10000	1.20157e-07
10100	1.22647e-07
10200	1.20726e-07
10300	1.18102e-07
10400	1.18914e-07
10500	1.16448e-07
10600	1.15556e-07
10700	1.16807e-07
10800	1.17579e-07
10900	1.14997e-07
11000	1.15892e-07
11100	1.13902e-07
11200	1.16696e-07
11300	1.19056e-07
11400	1.16756e-07
11500	1.15078e-07
11600	1.18581e-07
11700	1.1829e-07
11800	1.13266e-07
11900	1.14591e-07
12000	1.16032e-07
12100	1.14642e-07
12200	1.17864e-07
12300	1.20674e-07
12400	1.2219e-07
12500	1.20329e-07
12600	1.13178e-07
12700	1.17632e-07
12800	1.16031e-07
12900	1.1991e-07
13000	1.2328e-07
13100	1.18053e-07
13200	1.23024e-07
13300	1.19086e-07
13400	1.17521e-07
13500	1.14707e-07
13600	1.18304e-07
13700	1.20311e-07
13800	1.16955e-07
13900	1.16598e-07
14000	1.16933e-07
14100	1.18953e-07
14200	1.21143e-07
14300	1.17748e-07
14400	1.21656e-07
14500	1.20337e-07
14600	1.17307e-07
14700	1.1635e-07
14800	1.18097e-07
14900	1.18907e-07
15000	1.16259e-07
15100	1.18546e-07
15200	1.19781e-07
15300	1.15205e-07
15400	1.16235e-07
15500	1.13092e-07
15600	1.15082e-07
15700	1.15592e-07
15800	1.16425e-07
15900	1.16952e-07
16000	1.17053e-07
16100	1.17351e-07
16200	1.19859e-07
16300	1.17758e-07
16400	1.1749e-07
16500	1.17097e-07
16600	1.17458e-07
16700	1.17648e-07
16800	1.21288e-07
16900	1.17721e-07
17000	1.16695e-07
17100	1.15975e-07
17200	1.19965e-07
17300	1.17839e-07
17400	1.15569e-07
17500	1.17911e-07
17600	1.17408e-07
17700	1.17176e-07
17800	1.16429e-07
17900	1.18063e-07
18000	1.22167e-07
18100	1.17313e-07
18200	1.1588e-07
18300	1.16671e-07
18400	1.15965e-07
18500	1.14509e-07
18600	1.15755e-07
18700	1.14202e-07
18800	1.16834e-07
18900	1.1465e-07
19000	1.14874e-07
19100	1.16154e-07
19200	1.2049e-07
19300	1.18639e-07
19400	1.14017e-07
19500	1.1546e-07
19600	1.16904e-07
19700	1.2234e-07
19800	1.21924e-07
19900	1.20529e-07
20000	1.2005e-07
20100	1.18691e-07
20200	1.15615e-07
20300	1.13008e-07
20400	1.15003e-07
20500	1.18453e-07
20600	1.17287e-07
20700	1.181e-07
20800	1.2042e-07
20900	1.21844e-07
21000	1.17146e-07
21100	1.16286e-07
21200	1.19465e-07
21300	1.18779e-07
21400	1.20235e-07
21500	1.18895e-07
21600	1.17199e-07
21700	1.1846e-07
21800	1.19215e-07
21900	1.18228e-07
22000	1.18601e-07
22100	1.18536e-07
22200	1.22209e-07
22300	1.20883e-07
22400	1.20868e-07
22500	1.21122e-07
22600	1.21579e-07
22700	1.22353e-07
22800	1.21192e-07
22900	1.17412e-07
23000	1.20964e-07
23100	1.19936e-07
23200	1.1734e-07
23300	1.14336e-07
23400	1.14485e-07
23500	1.18105e-07
23600	1.19501e-07
23700	1.18214e-07
23800	1.17805e-07
23900	1.19816e-07
24000	1.15495e-07
24100	1.16597e-07
24200	1.15133e-07
24300	1.16946e-07
24400	1.22507e-07
24500	1.194e-07
24600	1.20029e-07
24700	1.16523e-07
24800	1.12971e-07
24900	1.1701e-07
25000	1.20058e-07
25100	1.18647e-07
25200	1.15444e-07
25300	1.13144e-07
25400	1.16151e-07
25500	1.14927e-07
25600	1.22022e-07
25700	1.22809e-07
25800	1.22421e-07
25900	1.17874e-07
26000	1.17118e-07
26100	1.16172e-07
26200	1.16852e-07
26300	1.1531e-07
26400	1.12889e-07
26500	1.13496e-07
26600	1.17261e-07
26700	1.2176e-07
26800	1.18676e-07
26900	1.21225e-07
27000	1.22824e-07
27100	1.17614e-07
27200	1.17149e-07
27300	1.16709e-07
27400	1.19473e-07
27500	1.18604e-07
27600	1.20588e-07
27700	1.20781e-07
27800	1.20068e-07
27900	1.18202e-07
28000	1.16371e-07
28100	1.1894e-07
28200	1.16676e-07
28300	1.15675e-07
28400	1.19918e-07
28500	1.16925e-07
28600	1.17946e-07
28700	1.19278e-07
28800	1.1766e-07
28900	1.1887e-07
29000	1.21043e-07
29100	1.17555e-07
29200	1.16302e-07
29300	1.17801e-07
29400	1.18944e-07
29500	1.18349e-07
29600	1.14157e-07
29700	1.1382e-07
29800	1.20679e-07
29900	1.16875e-07
30000	1.1719e-07
30100	1.15954e-07
30200	1.14269e-07
30300	1.20429e-07
30400	1.18106e-07
30500	1.16538e-07
30600	1.16654e-07
30700	1.19402e-07
30800	1.23671e-07
30900	1.19374e-07
31000	1.17758e-07
31100	1.18639e-07
31200	1.19091e-07
31300	1.23171e-07
31400	1.22971e-07
31500	1.21164e-07
31600	1.21018e-07
31700	1.20133e-07
31800	1.17924e-07
31900	1.23088e-07
32000	1.21825e-07
32100	1.18341e-07
32200	1.16305e-07
32300	1.12825e-07
32400	1.14687e-07
32500	1.16826e-07
32600	1.19304e-07
32700	1.20828e-07
32800	1.19552e-07
32900	1.18276e-07
33000	1.20851e-07
33100	1.17642e-07
33200	1.16451e-07
33300	1.19323e-07
33400	1.1844e-07
33500	1.19181e-07
33600	1.19221e-07
33700	1.16486e-07
33800	1.18223e-07
33900	1.20952e-07
34000	1.18491e-07
34100	1.1784e-07
34200	1.20934e-07
34300	1.18109e-07
34400	1.15537e-07
34500	1.17694e-07
34600	1.19183e-07
34700	1.17848e-07
34800	1.18356e-07
34900	1.22094e-07
35000	1.24369e-07
35100	1.23927e-07
35200	1.18978e-07
35300	1.18755e-07
35400	1.20884e-07
35500	1.24897e-07
35600	1.2047e-07
35700	1.21457e-07
35800	1.20217e-07
35900	1.20767e-07
36000	1.18399e-07
36100	1.17365e-07
36200	1.16036e-07
36300	1.16882e-07
36400	1.15517e-07
36500	1.13588e-07
36600	1.15034e-07
36700	1.1903e-07
36800	1.23722e-07
36900	2.27603e-06
37000	1.42243e-05
37100	5.6475e-06
37200	1.33167e-07
37300	1.21068e-07
37400	1.19198e-07
37500	1.1687e-07
37600	1.17006e-07
37700	1.21187e-07
37800	1.203e-07
37900	1.19334e-07
38000	1.16972e-07
38100	1.1879e-07
38200	1.17229e-07
38300	1.15292e-07
38400	1.19757e-07
38500	1.21521e-07
38600	1.20247e-07
38700	1.19403e-07
38800	1.2272e-07
38900	1.23949e-07
39000	1.17528e-07
39100	1.12429e-07
39200	1.16745e-07
39300	1.18464e-07
39400	1.19701e-07
39500	1.17726e-07
39600	1.1842e-07
39700	1.1963e-07
39800	1.19048e-07
39900	1.16853e-07
40000	1.18993e-07
40100	1.20255e-07
40200	1.18626e-07
40300	1.18226e-07
40400	1.19892e-07
40500	1.18795e-07
40600	1.18876e-07
40700	1.17097e-07
40800	1.18596e-07
40900	1.21212e-07
41000	1.25301e-07
41100	1.23416e-07
41200	1.20033e-07
41300	1.28155e-07
41400	1.5526e-07
41500	2.91327e-07
41600	8.6118e-07
41700	2.54929e-06
41800	5.51008e-06
41900	6.73615e-06
42000	3.81511e-06
42100	5.99619e-06
42200	9.74474e-06
42300	2.40213e-05
42400	2.03058e-05
42500	8.82035e-06
42600	1.3158e-05
42700	9.12244e-06
42800	2.41424e-06
42900	4.63418e-07
43000	1.64574e-07
43100	1.32668e-07
43200	1.25519e-07
43300	2.21099e-07
43400	2.73282e-07
43500	1.35317e-07
43600	1.25236e-07
43700	1.23179e-07
43800	1.18646e-07
43900	1.14846e-07
44000	1.18882e-07
44100	1.33593e-07
44200	1.63322e-07
44300	1.26156e-07
44400	1.19515e-07
44500	1.18745e-07
44600	1.21071e-07
44700	1.17746e-07
44800	1.21536e-07
44900	2.49968e-07
45000	2.42937e-07
45100	1.23977e-07
45200	1.17401e-07
45300	1.2024e-07
45400	1.22381e-07
45500	1.16985e-07
45600	1.15154e-07
45700	1.15579e-07
45800	1.21004e-07
45900	1.18674e-07
46000	1.2071e-07
46100	1.18927e-07
46200	1.21138e-07
46300	1.19293e-07
46400	1.18027e-07
46500	1.18039e-07
46600	1.16971e-07
46700	1.16534e-07
46800	1.21744e-07
46900	1.19667e-07
47000	1.19635e-07
47100	1.18602e-07
47200	1.16276e-07
47300	1.16939e-07
47400	1.19178e-07
47500	1.18098e-07
47600	1.19994e-07
47700	1.20951e-07
47800	1.16256e-07
47900	1.15184e-07
48000	1.15669e-07
48100	1.15603e-07
48200	1.17598e-07
48300	1.1808e-07
48400	1.15517e-07
48500	1.14497e-07
48600	1.15675e-07
48700	1.19559e-07
48800	1.22358e-07
48900	1.20774e-07
49000	1.17215e-07
49100	1.17962e-07
49200	1.15778e-07
49300	1.18601e-07
49400	1.21747e-07
49500	1.18375e-07
49600	1.17239e-07
49700	1.18266e-07
49800	1.19848e-07
49900	1.22903e-07
50000	1.19703e-07
50100	1.19755e-07
50200	1.26443e-07
50300	1.28362e-07
50400	1.25033e-07
50500	1.25063e-07
50600	1.23752e-07
50700	1.20207e-07
50800	1.23329e-07
50900	1.29279e-07
51000	1.30385e-07
51100	1.27426e-07
51200	1.28264e-07
51300	1.30924e-07
51400	1.30571e-07
51500	1.26124e-07
51600	1.27363e-07
51700	1.29708e-07
51800	1.26214e-07
51900	1.26006e-07
52000	1.25037e-07
52100	1.22616e-07
52200	1.19575e-07
52300	1.20998e-07
52400	1.19096e-07
52500	1.18023e-07
52600	1.19832e-07
52700	1.19415e-07
52800	1.15872e-07
52900	1.2073e-07
53000	1.19234e-07
53100	1.2121e-07
53200	1.19729e-07
53300	1.20182e-07
53400	1.17244e-07
53500	1.20752e-07
53600	1.19642e-07
53700	1.19785e-07
53800	1.20756e-07
53900	1.20941e-07
54000	1.1941e-07
54100	1.18818e-07
54200	1.2174e-07
54300	1.18685e-07
54400	1.15617e-07
54500	1.19557e-07
54600	1.21797e-07
54700	1.19191e-07
54800	1.1758e-07
54900	1.19524e-07
55000	1.17552e-07
55100	1.13281e-07
55200	1.20542e-07
55300	1.18485e-07
55400	1.17719e-07
55500	1.15428e-07
55600	1.16261e-07
55700	1.18884e-07
55800	1.20343e-07
55900	1.21599e-07
56000	1.18194e-07
56100	1.18166e-07
56200	1.18847e-07
56300	1.18089e-07
56400	1.1377e-07
56500	1.15608e-07
56600	1.14789e-07
56700	1.19062e-07
56800	1.21856e-07
56900	1.19604e-07
57000	1.18791e-07
57100	1.19212e-07
57200	1.16628e-07
57300	1.17993e-07
57400	1.22549e-07
57500	1.22392e-07
57600	1.20127e-07
57700	1.19575e-07
57800	1.16428e-07
57900	1.17738e-07
58000	1.19671e-07
58100	1.17521e-07
58200	1.22459e-07
58300	1.21385e-07
58400	1.20133e-07
58500	1.17017e-07
58600	1.14539e-07
58700	1.18335e-07
58800	1.15108e-07
58900	1.15379e-07
59000	1.20959e-07
59100	1.21022e-07
59200	1.19567e-07
59300	1.16503e-07
59400	1.13374e-07
59500	1.18357e-07
59600	1.25579e-07
59700	1.43877e-07
59800	4.75046e-06
59900	3.3997e-05
60000	1.48237e-05
60100	1.86283e-07
60200	1.22171e-07
60300	1.21406e-07
60400	1.22923e-07
60500	1.24682e-07
60600	1.20842e-07
60700	1.21553e-07
60800	1.22605e-07
60900	1.21628e-07
61000	1.19638e-07
61100	1.1657e-07
61200	1.17129e-07
61300	1.17001e-07
61400	1.18531e-07
61500	1.18955e-07
61600	1.18539e-07
61700	1.15454e-07
61800	1.13958e-07
61900	1.16592e-07
62000	1.18304e-07
62100	1.169e-07
62200	1.17379e-07
62300	1.17857e-07
62400	1.17891e-07
62500	1.18334e-07
62600	1.24154e-07
62700	1.19991e-07
62800	1.18181e-07
62900	1.16646e-07
63000	1.18159e-07
63100	1.16269e-07
63200	1.16958e-07
63300	1.20459e-07
63400	1.22253e-07
63500	1.18391e-07
63600	1.15358e-07
63700	1.21728e-07
63800	1.2816e-07
63900	1.20708e-07
64000	1.17397e-07
64100	1.19056e-07
64200	1.21242e-07
64300	1.19826e-07
64400	1.22013e-07
64500	1.22036e-07
64600	1.22362e-07
64700	1.22105e-07
64800	1.20744e-07
64900	1.2245e-07
65000	1.23292e-07
65100	1.22413e-07
65200	1.23318e-07
65300	1.2164e-07
65400	1.16167e-07
65500	1.18899e-07
65600	1.19413e-07
65700	1.20039e-07
65800	1.20825e-07
65900	1.2286e-07
66000	1.215e-07
66100	1.27195e-07
66200	1.28383e-07
66300	1.25601e-07
66400	1.2378e-07
66500	1.20543e-07
66600	1.19607e-07
66700	1.24135e-07
66800	1.24215e-07
66900	1.28966e-07
67000	1.43212e-07
67100	1.89477e-07
67200	2.74663e-07
67300	2.28836e-07
67400	1.47076e-07
67500	1.30085e-07
67600	1.21829e-07
67700	1.28106e-07
67800	1.83084e-07
67900	2.32236e-07
68000	3.33256e-07
68100	4.36623e-07
68200	7.7208e-07
68300	4.82874e-06
68400	4.40717e-06
68500	2.01715e-06
68600	6.15482e-07
68700	3.16614e-07
68800	1.68918e-07
68900	1.68602e-07
69000	1.4008e-07
69100	1.2621e-07
69200	1.36894e-07
69300	1.36976e-07
69400	1.32855e-07
69500	1.26099e-07
69600	1.21857e-07
69700	1.21987e-07
69800	1.2237e-07
69900	1.21389e-07
70000	1.19389e-07
70100	1.32562e-07
70200	1.26709e-07
70300	1.2369e-07
70400	1.26514e-07
70500	1.22621e-07
70600	1.20336e-07
70700	1.20141e-07
70800	1.19385e-07
70900	1.21702e-07
71000	1.19082e-07
71100	1.19992e-07
71200	1.21528e-07
71300	1.2116e-07
71400	1.21777e-07
71500	1.22953e-07
71600	1.1765e-07
71700	1.17362e-07
71800	1.14827e-07
71900	1.17964e-07
72000	1.17831e-07
72100	1.1777e-07
72200	1.23713e-07
72300	1.20843e-07
72400	1.19994e-07
72500	1.23975e-07
72600	1.25235e-07
72700	1.18086e-07
72800	1.17531e-07
72900	1.1752e-07
73000	1.20225e-07
73100	1.21464e-07
73200	1.18719e-07
73300	1.18826e-07
73400	1.20131e-07
73500	1.17066e-07
73600	1.16674e-07
73700	1.17923e-07
73800	1.14396e-07
73900	3.45019e-07
74000	2.70002e-06
74100	1.6836e-06
74200	1.43355e-07
74300	1.21089e-07
74400	1.18811e-07
74500	1.19315e-07
74600	1.21173e-07
74700	1.2184e-07
74800	1.19526e-07
74900	1.16046e-07
75000	1.22737e-07
75100	1.20385e-07
75200	1.20491e-07
75300	1.20166e-07
75400	1.19855e-07
75500	1.19057e-07
75600	1.19659e-07
75700	1.19568e-07
75800	1.18096e-07
75900	1.18571e-07
76000	1.12937e-07
76100	1.15942e-07
76200	1.18335e-07
76300	1.14761e-07
76400	1.18827e-07
76500	1.21742e-07
76600	1.17248e-07
76700	1.16122e-07
76800	1.20488e-07
76900	1.15901e-07
77000	1.18278e-07
77100	1.17642e-07
77200	1.15988e-07
77300	1.17113e-07
77400	1.18035e-07
77500	1.18945e-07
77600	1.18464e-07
77700	1.18422e-07
77800	1.18337e-07
77900	1.16637e-07
78000	1.20479e-07
78100	1.23914e-07
78200	1.22888e-07
78300	1.21658e-07
78400	1.21386e-07
78500	1.20545e-07
78600	1.22933e-07
78700	1.22585e-07
78800	1.18616e-07
78900	1.20912e-07
79000	1.20472e-07
79100	1.14889e-07
79200	1.1338e-07
79300	1.15741e-07
79400	1.18474e-07
79500	1.20837e-07
79600	1.19678e-07
79700	1.17116e-07
79800	1.1881e-07
79900	1.2155e-07
80000	1.20413e-07
80100	1.16105e-07
80200	1.2063e-07
80300	1.23677e-07
80400	1.23827e-07
80500	1.20653e-07
80600	1.17381e-07
80700	1.16961e-07
80800	1.14333e-07
80900	1.14763e-07
81000	1.17239e-07
81100	1.20229e-07
81200	1.21908e-07
81300	1.18953e-07
81400	1.20823e-07
81500	1.16941e-07
81600	1.15444e-07
81700	1.17567e-07
81800	1.1382e-07
81900	1.14822e-07
82000	1.21493e-07
82100	1.21588e-07
82200	1.19661e-07
82300	1.18805e-07
82400	1.19624e-07
82500	1.14762e-07
82600	1.15577e-07
82700	1.15862e-07
82800	1.14881e-07
82900	1.1497e-07
83000	1.21508e-07
83100	1.20671e-07
83200	1.22149e-07
83300	1.32705e-07
83400	1.42291e-07
83500	1.5915e-07
83600	1.86206e-07
83700	1.69917e-07
83800	1.36225e-07
83900	1.35937e-07
84000	1.60753e-07
84100	1.47436e-07
84200	1.59277e-07
84300	1.68249e-07
84400	1.71362e-07
84500	2.16648e-07
84600	2.76816e-07
84700	3.27068e-07
84800	2.35897e-07
84900	1.91603e-07
85000	1.66838e-07
85100	1.66558e-07
85200	1.68771e-07
85300	2.07355e-07
85400	1.85747e-07
85500	1.46486e-07
85600	1.258e-07
85700	1.21231e-07
85800	1.17378e-07
85900	1.16692e-07
86000	1.21266e-07
86100	1.20105e-07
86200	1.18519e-07
86300	1.22399e-07
86400	1.23573e-07
86500	1.23839e-07
86600	1.27356e-07
86700	1.23537e-07
86800	1.22048e-07
86900	1.21987e-07
87000	1.17197e-07
87100	1.15078e-07
87200	1.15693e-07
87300	1.2049e-07
87400	1.16959e-07
87500	1.18595e-07
87600	1.16483e-07
87700	1.16242e-07
87800	1.14985e-07
87900	1.20336e-07
88000	1.21416e-07
88100	1.19871e-07
88200	1.21426e-07
88300	1.18928e-07
88400	1.19179e-07
88500	1.19203e-07
88600	1.15068e-07
88700	1.18669e-07
88800	1.19357e-07
88900	1.17887e-07
89000	1.20597e-07
89100	1.20778e-07
89200	1.18335e-07
89300	1.18538e-07
89400	1.23415e-07
89500	1.20715e-07
89600	1.14096e-07
89700	1.14803e-07
89800	1.18011e-07
89900	1.18611e-07
90000	1.20326e-07
90100	1.21259e-07
90200	1.18569e-07
90300	1.20444e-07
90400	1.19395e-07
90500	1.20698e-07
90600	1.20681e-07
90700	1.15669e-07
90800	1.11007e-07
90900	1.17407e-07
91000	1.18196e-07
91100	1.19858e-07
91200	1.21948e-07
91300	1.22689e-07
91400	1.20839e-07
91500	1.19909e-07
91600	1.20727e-07
91700	1.20532e-07
91800	1.19709e-07
91900	1.16818e-07
92000	1.19677e-07
92100	1.18417e-07
92200	1.19777e-07
92300	1.22089e-07
92400	1.21885e-07
92500	1.21081e-07
92600	1.21742e-07
92700	1.19738e-07
92800	1.17732e-07
92900	1.21316e-07
93000	1.16942e-07
93100	1.15134e-07
93200	1.1859e-07
93300	1.15085e-07
93400	1.10845e-07
93500	1.15139e-07
93600	1.16704e-07
93700	1.18662e-07
93800	1.21608e-07
93900	1.21503e-07
94000	1.24899e-07
94100	1.22549e-07
94200	1.20246e-07
94300	1.20122e-07
94400	1.15998e-07
94500	1.15252e-07
94600	1.15852e-07
94700	1.14984e-07
94800	1.17048e-07
94900	1.16207e-07
95000	1.16578e-07
95100	1.1536e-07
95200	1.1528e-07
95300	1.17054e-07
95400	1.18899e-07
95500	1.17883e-07
95600	1.17706e-07
95700	1.22074e-07
95800	1.22791e-07
95900	1.19863e-07
96000	1.22902e-07
96100	1.21592e-07
96200	1.13129e-07
96300	1.11806e-07
96400	1.19987e-07
96500	1.23738e-07
96600	1.22838e-07
96700	1.15284e-07
96800	1.1447e-07
96900	1.17029e-07
97000	1.17874e-07
97100	1.175e-07
97200	1.1749e-07
97300	1.21478e-07
97400	1.20209e-07
97500	1.16707e-07
97600	1.16364e-07
97700	1.21634e-07
97800	1.211e-07
97900	1.17904e-07
98000	1.18647e-07
98100	1.18873e-07
98200	1.164e-07
98300	1.17403e-07
98400	1.16607e-07
98500	1.15853e-07
98600	1.16428e-07
98700	1.16932e-07
98800	1.17868e-07
98900	1.20265e-07
99000	1.18664e-07
99100	1.12832e-07
99200	1.16793e-07
99300	1.17262e-07
99400	1.18473e-07
99500	1.19346e-07
99600	1.20838e-07
99700	1.15193e-07
99800	1.21567e-07
99900	1.22727e-07
100000	1.21075e-07
100100	1.24033e-07
100200	1.19097e-07
100300	1.18192e-07
100400	1.20808e-07
100500	1.25645e-07
100600	1.27137e-07
100700	1.23279e-07
100800	1.21248e-07
100900	1.19702e-07
101000	1.22536e-07
101100	1.25614e-07
101200	1.25481e-07
101300	1.2254e-07
101400	1.18254e-07
101500	1.23129e-07
101600	1.25273e-07
101700	1.23951e-07
101800	1.24221e-07
101900	1.22383e-07
102000	1.19334e-07
102100	1.21025e-07
102200	1.22773e-07
102300	1.23896e-07
102400	1.23124e-07
102500	1.24331e-07
102600	1.2203e-07
102700	1.20186e-07
102800	1.2229e-07
102900	1.23409e-07
103000	1.21304e-07
103100	1.17684e-07
103200	1.17532e-07
103300	1.22825e-07
103400	1.21364e-07
103500	1.19873e-07
103600	1.15463e-07
103700	1.16895e-07
103800	1.20634e-07
103900	1.22948e-07
104000	1.16458e-07
104100	1.19964e-07
104200	1.2285e-07
104300	1.20986e-07
104400	1.16789e-07
104500	1.16318e-07
104600	1.17587e-07
104700	1.21008e-07
104800	1.20313e-07
104900	1.16428e-07
105000	1.15756e-07
105100	1.16491e-07
105200	1.17035e-07
105300	1.21564e-07
105400	1.24429e-07
105500	1.24501e-07
105600	1.18892e-07
105700	1.16955e-07
105800	1.16468e-07
105900	1.16301e-07
106000	1.19332e-07
106100	1.1933e-07
106200	1.14418e-07
106300	1.16276e-07
106400	1.1918e-07
106500	1.16238e-07
106600	1.1663e-07
106700	1.19109e-07
106800	1.16399e-07
106900	1.18761e-07
107000	1.20493e-07
107100	1.18586e-07
107200	1.16697e-07
107300	1.16671e-07
107400	1.1863e-07
107500	1.19677e-07
107600	1.16228e-07
107700	1.20277e-07
107800	1.20865e-07
107900	1.17842e-07
108000	1.17707e-07
108100	1.17518e-07
108200	1.22162e-07
108300	1.22193e-07
108400	1.22919e-07
108500	1.18244e-07
108600	1.17688e-07
108700	1.159e-07
108800	1.17198e-07
108900	1.14758e-07
109000	1.15314e-07
109100	1.18055e-07
109200	1.19085e-07
109300	1.17423e-07
109400	1.1819e-07
109500	1.20518e-07
109600	1.15422e-07
109700	1.15274e-07
109800	1.16232e-07
109900	1.19543e-07
110000	1.17936e-07
110100	1.17319e-07
110200	1.17648e-07
110300	1.19351e-07
110400	1.18534e-07
110500	1.22261e-07
110600	1.1898e-07
110700	1.12928e-07
110800	1.18598e-07
110900	1.58772e-07
111000	9.59409e-07
111100	9.00569e-07
111200	1.4703e-07
111300	1.15849e-07
111400	1.16307e-07
111500	1.19039e-07
111600	1.21062e-07
111700	1.17809e-07
111800	1.15371e-07
111900	1.17762e-07
112000	1.18366e-07
112100	1.17808e-07
112200	1.19022e-07
112300	1.17299e-07
112400	1.19194e-07
112500	1.17558e-07
112600	1.1926e-07
112700	1.20975e-07
112800	1.20915e-07
112900	1.18999e-07
113000	1.1685e-07
113100	1.17331e-07
113200	1.18739e-07
113300	1.19198e-07
113400	1.2184e-07
113500	1.18485e-07
113600	1.17158e-07
113700	1.22215e-07
113800	1.17581e-07
113900	1.14005e-07
114000	1.17245e-07
114100	1.16265e-07
114200	1.15474e-07
114300	1.19235e-07
114400	1.17016e-07
114500	1.16105e-07
114600	1.18144e-07
114700	1.17155e-07
114800	1.1768e-07
114900	1.19827e-07
115000	1.16358e-07
115100	1.16962e-07
115200	1.17015e-07
115300	1.17923e-07
115400	1.14331e-07
115500	1.14202e-07
115600	1.19393e-07
115700	1.20781e-07
115800	1.1813e-07
115900	1.16019e-07
116000	1.17093e-07
116100	1.17123e-07
116200	1.17609e-07
116300	1.17462e-07
116400	1.16738e-07
116500	1.18821e-07
116600	1.18411e-07
116700	1.17905e-07
116800	1.19307e-07
116900	1.18937e-07
117000	1.16934e-07
117100	1.16149e-07
117200	1.20708e-07
117300	1.18108e-07
117400	1.16364e-07
117500	1.21314e-07
117600	1.22978e-07
117700	1.16708e-07
117800	1.18567e-07
117900	1.18313e-07
118000	1.15612e-07
118100	1.13177e-07
118200	1.15648e-07
118300	1.16176e-07
118400	1.14882e-07
118500	1.16194e-07
118600	1.15479e-07
118700	1.14061e-07
118800	1.17201e-07
118900	1.16837e-07
119000	1.1468e-07
119100	1.15425e-07
119200	1.15682e-07
119300	1.19385e-07
119400	1.1698e-07
119500	1.15809e-07
119600	1.16392e-07
119700	1.21555e-07
119800	1.93548e-07
119900	1.70074e-07
120000	1.15749e-07
120100	1.14032e-07
120200	1.13179e-07
120300	1.16078e-07
120400	1.20151e-07
120500	1.20245e-07
120600	1.19032e-07
120700	1.20928e-07
120800	1.19771e-07
120900	1.15928e-07
121000	1.16364e-07
121100	1.17134e-07
121200	1.19768e-07
121300	1.21371e-07
121400	1.21054e-07
121500	1.15458e-07
121600	1.18774e-07
121700	1.19735e-07
121800	1.16712e-07
121900	1.21386e-07
122000	1.18934e-07
122100	1.13469e-07
122200	1.15947e-07
122300	1.1829e-07
122400	1.18638e-07
122500	1.15147e-07
122600	1.16544e-07
122700	1.16962e-07
122800	1.14125e-07
122900	1.12439e-07
123000	1.13062e-07
123100	1.19656e-07
123200	1.20923e-07
123300	1.20252e-07
123400	1.1852e-07
123500	1.1797e-07
123600	1.15868e-07
123700	1.13514e-07
123800	1.12933e-07
123900	1.1601e-07
124000	1.16885e-07
124100	1.1519e-07
124200	1.20217e-07
124300	1.1908e-07
124400	1.17271e-07
124500	1.16875e-07
124600	1.20614e-07
124700	1.23392e-07
124800	1.30461e-07
124900	1.55918e-07
125000	2.11811e-07
125100	3.29283e-07
125200	5.27348e-07
125300	7.39973e-07
125400	7.84136e-07
125500	5.59867e-07
125600	2.61005e-07
125700	3.19613e-07
125800	6.07688e-07
125900	4.94525e-07
126000	3.41515e-07
126100	5.99029e-07
126200	4.94751e-07
126300	5.35414e-07
126400	5.97873e-07
126500	6.14585e-07
126600	7.59597e-07
126700	1.0779e-06
126800	1.74856e-06
126900	2.31181e-06
127000	2.27377e-06
127100	2.68072e-06
127200	2.15561e-06
127300	9.05024e-07
127400	7.82093e-07
127500	8.65026e-07
127600	7.49175e-07
127700	9.58423e-07
127800	7.52794e-07
127900	1.05033e-06
128000	1.68735e-06
128100	1.36975e-06
128200	6.8804e-07
128300	2.914e-07
128400	1.66176e-07
128500	1.33094e-07
128600	1.23582e-07
128700	1.22674e-07
128800	1.15802e-07
128900	1.13866e-07
129000	1.18201e-07
129100	1.19391e-07
129200	1.20096e-07
129300	1.17443e-07
129400	1.14987e-07
129500	1.15144e-07
129600	1.1883e-07
129700	1.19689e-07
129800	1.18785e-07
129900	1.1472e-07
130000	1.18517e-07
130100	1.18968e-07
130200	1.17633e-07
130300	1.18079e-07
130400	1.17616e-07
130500	1.1972e-07
130600	1.20262e-07
130700	1.15471e-07
130800	1.14959e-07
130900	1.14781e-07
131000	1.15623e-07
131100	1.16279e-07
131200	1.17151e-07
131300	1.18547e-07
131400	1.14404e-07
131500	1.14624e-07
131600	1.14949e-07
131700	1.14902e-07
131800	1.16035e-07
131900	1.1388e-07
132000	1.19126e-07
132100	1.18598e-07
132200	1.16451e-07
132300	1.18526e-07
132400	1.17795e-07
132500	1.165e-07
132600	1.16103e-07
132700	1.20891e-07
132800	1.20702e-07
132900	1.19596e-07
133000	1.16839e-07
133100	1.18141e-07
133200	1.1522e-07
133300	1.16584e-07
133400	1.1811e-07
133500	1.18806e-07
133600	1.16479e-07
133700	1.2196e-07
133800	1.19995e-07
133900	1.18131e-07
134000	1.14657e-07
134100	1.1472e-07
134200	1.14644e-07
134300	1.19808e-07
134400	1.29964e-07
134500	1.20992e-07
134600	1.10931e-07
134700	1.12258e-07
134800	1.15875e-07
134900	1.15868e-07
135000	1.20952e-07
135100	1.19997e-07
135200	1.17029e-07
135300	1.15034e-07
135400	1.17092e-07
135500	1.16464e-07
135600	1.20523e-07
135700	1.19375e-07
135800	1.1663e-07
135900	1.18379e-07
136000	1.15729e-07
136100	1.17479e-07
136200	1.17366e-07
136300	1.1841e-07
136400	1.21484e-07
136500	1.16802e-07
136600	1.14358e-07
136700	1.1393e-07
136800	1.14247e-07
136900	1.17864e-07
137000	1.1626e-07
137100	1.1527e-07
137200	1.1912e-07
137300	1.17911e-07
137400	1.16808e-07
137500	1.14941e-07
137600	1.13603e-07
137700	1.18241e-07
137800	1.19546e-07
137900	1.21153e-07
138000	1.20775e-07
138100	1.17795e-07
138200	1.15727e-07
138300	1.138e-07
138400	1.12984e-07
138500	1.16797e-07
138600	1.18864e-07
138700	1.17018e-07
138800	1.14607e-07
138900	1.13471e-07
139000	1.16016e-07
139100	1.17299e-07
139200	1.1612e-07
139300	1.20055e-07
139400	1.15686e-07
139500	1.14111e-07
139600	1.14962e-07
139700	1.12707e-07
139800	1.14356e-07
139900	1.12081e-07
140000	1.10423e-07
140100	1.15267e-07
140200	1.15495e-07
140300	1.18194e-07
140400	1.15352e-07
140500	1.1704e-07
140600	1.19989e-07
140700	1.22307e-07
140800	1.22713e-07
140900	1.2053e-07
141000	1.17618e-07
141100	1.19826e-07
141200	1.21249e-07
141300	1.17238e-07
141400	1.156e-07
141500	1.17768e-07
141600	1.19338e-07
141700	1.13733e-07
141800	1.1404e-07
141900	1.17531e-07
142000	1.16526e-07
142100	1.21082e-07
142200	1.18761e-07
142300	1.1918e-07
142400	1.1869e-07
142500	1.16043e-07
142600	1.14921e-07
142700	1.14867e-07
142800	1.20686e-07
142900	1.16728e-07
143000	1.15326e-07
143100	1.17188e-07
143200	1.17765e-07
143300	1.17172e-07
143400	1.19045e-07
143500	1.17598e-07
143600	1.15699e-07
143700	1.14476e-07
143800	1.15187e-07
143900	1.18657e-07
144000	1.16877e-07
144100	1.1465e-07
144200	1.15767e-07
144300	1.16562e-07
144400	1.20711e-07
144500	1.20012e-07
144600	1.17702e-07
144700	1.12832e-07
144800	1.17452e-07
144900	1.22254e-07
145000	1.19779e-07
145100	1.18065e-07
145200	1.16109e-07
145300	1.14147e-07
145400	1.13908e-07
145500	1.16385e-07
145600	1.14137e-07
145700	1.13647e-07
145800	1.16622e-07
145900	1.18048e-07
146000	1.1422e-07
146100	1.17452e-07
146200	1.17634e-07
146300	1.14862e-07
146400	1.14972e-07
146500	1.13538e-07
146600	1.14534e-07
146700	1.18925e-07
146800	1.17204e-07
146900	1.10791e-07
147000	1.11028e-07
147100	1.14624e-07
147200	1.20635e-07
147300	1.22135e-07
147400	1.18707e-07
147500	1.15531e-07
147600	1.15527e-07
147700	1.17479e-07
147800	1.19853e-07
147900	1.19673e-07
148000	1.7645e-07
148100	2.02233e-07
148200	1.25905e-07
148300	1.1766e-07
148400	1.14864e-07
148500	1.16102e-07
148600	1.15917e-07
148700	1.12184e-07
148800	1.16925e-07
148900	1.15726e-07
149000	1.16156e-07
149100	1.20359e-07
149200	1.17467e-07
149300	1.1599e-07
149400	1.15312e-07
149500	1.16304e-07
149600	1.20351e-07
149700	1.18391e-07
149800	1.21932e-07
149900	1.18588e-07
150000	1.16757e-07
150100	1.17685e-07
150200	1.19039e-07
150300	1.16707e-07
150400	1.19165e-07
150500	1.1701e-07
150600	1.16898e-07
150700	1.20674e-07
150800	1.19643e-07
150900	1.20936e-07
151000	1.22892e-07
151100	1.23074e-07
151200	1.24871e-07
151300	1.23912e-07
151400	1.17167e-07
151500	1.16301e-07
151600	1.16786e-07
151700	1.17415e-07
151800	1.18718e-07
151900	1.16204e-07
152000	1.15834e-07
152100	1.14887e-07
152200	1.13982e-07
152300	1.16886e-07
152400	1.16602e-07
152500	1.12812e-07
152600	1.17729e-07
152700	1.21539e-07
152800	1.22321e-07
152900	1.17899e-07
153000	1.15376e-07
153100	1.19834e-07
153200	1.22338e-07
153300	1.19217e-07
153400	1.1693e-07
153500	1.19079e-07
153600	1.16335e-07
153700	1.21762e-07
153800	1.21547e-07
153900	1.17271e-07
154000	1.15984e-07
154100	1.15862e-07
154200	1.16628e-07
154300	1.1548e-07
154400	1.18163e-07
154500	1.20753e-07
154600	1.16569e-07
154700	1.1357e-07
154800	1.17403e-07
154900	1.19336e-07
155000	1.16686e-07
155100	1.15531e-07
155200	1.14628e-07
155300	1.15046e-07
155400	1.12764e-07
155500	1.1196e-07
155600	1.19122e-07
155700	1.19309e-07
155800	1.15654e-07
155900	1.18766e-07
156000	1.18452e-07
156100	1.17037e-07
156200	1.13446e-07
156300	1.14913e-07
156400	1.19408e-07
156500	1.17084e-07
156600	1.14471e-07
156700	1.18297e-07
156800	1.14311e-07
156900	1.12344e-07
157000	1.12783e-07
157100	1.13963e-07
157200	1.16338e-07
157300	1.14423e-07
157400	1.12471e-07
157500	1.13932e-07
157600	1.15768e-07
157700	1.17458e-07
157800	1.20331e-07
157900	1.17744e-07
158000	1.15992e-07
158100	1.15035e-07
158200	1.16585e-07
158300	1.15134e-07
158400	1.15973e-07
158500	1.16949e-07
158600	1.1071e-07
158700	1.1123e-07
158800	1.15939e-07
158900	1.16731e-07
159000	1.17371e-07
159100	1.16295e-07
159200	1.19446e-07
159300	1.18686e-07
159400	1.18707e-07
159500	1.16082e-07
159600	1.12289e-07
159700	1.10999e-07
159800	1.10786e-07
159900	1.12859e-07
160000	1.1301e-07
160100	1.13282e-07
160200	1.21376e-07
160300	1.1804e-07
160400	1.1323e-07
160500	1.15502e-07
160600	1.17359e-07
160700	1.15533e-07
160800	1.1639e-07
160900	1.18481e-07
161000	1.19688e-07
161100	1.1891e-07
161200	1.15679e-07
161300	1.1748e-07
161400	1.18269e-07
161500	1.19687e-07
161600	1.17596e-07
161700	1.16211e-07
161800	1.14747e-07
161900	1.14782e-07
162000	1.13919e-07
162100	1.15077e-07
162200	1.1845e-07
162300	1.18433e-07
162400	1.18628e-07
162500	1.1516e-07
162600	1.14685e-07
162700	1.16272e-07
162800	1.16612e-07
162900	1.12151e-07
163000	1.13774e-07
163100	1.15664e-07
163200	1.1447e-07
163300	1.18888e-07
163400	1.20404e-07
163500	1.16861e-07
163600	1.10687e-07
163700	1.12481e-07
163800	1.16981e-07
163900	1.12754e-07
164000	1.17289e-07
164100	1.17735e-07
164200	1.15959e-07
164300	1.16343e-07
164400	1.15615e-07
164500	1.16754e-07
164600	1.1029e-07
164700	1.09242e-07
164800	1.14419e-07
164900	1.14749e-07
165000	1.14819e-07
165100	1.13429e-07
165200	1.12822e-07
165300	1.16571e-07
165400	1.18636e-07
165500	1.176e-07
165600	1.15026e-07
165700	1.17477e-07
165800	1.17077e-07
165900	1.17064e-07
166000	1.16186e-07
166100	1.12638e-07
166200	1.16141e-07
166300	1.17344e-07
166400	1.16377e-07
166500	1.17506e-07
166600	1.1455e-07
166700	1.21945e-07
166800	1.31061e-07
166900	1.37262e-07
167000	1.48797e-07
167100	1.55379e-07
167200	1.48927e-07
167300	1.33581e-07
167400	1.23589e-07
167500	1.27191e-07
167600	1.34988e-07
167700	1.34997e-07
167800	1.2413e-07
167900	1.30571e-07
168000	1.37311e-07
168100	1.24865e-07
168200	1.34155e-07
168300	1.33206e-07
168400	1.33452e-07
168500	1.35148e-07
168600	1.3428e-07
168700	1.33948e-07
168800	1.36174e-07
168900	1.42217e-07
169000	1.61419e-07
169100	1.84657e-07
169200	2.06897e-07
169300	1.6158e-07
169400	1.86053e-07
169500	2.36263e-07
169600	1.69337e-07
169700	1.44936e-07
169800	1.3692e-07
169900	1.36824e-07
170000	1.38195e-07
170100	1.30385e-07
170200	1.35107e-07
170300	1.34633e-07
170400	1.40323e-07
170500	1.2617e-07
170600	1.36618e-07
170700	1.6157e-07
170800	1.60293e-07
170900	1.38957e-07
171000	1.24753e-07
171100	1.19586e-07
171200	1.16415e-07
171300	1.16266e-07
171400	1.17363e-07
171500	1.133e-07
171600	1.14812e-07
171700	1.15454e-07
171800	1.14304e-07
171900	1.14661e-07
172000	1.13052e-07
172100	1.16183e-07
172200	1.17394e-07
172300	1.14916e-07
172400	1.15237e-07
172500	1.19736e-07
172600	1.17244e-07
172700	1.14414e-07
172800	1.1442e-07
172900	1.14935e-07
173000	1.14694e-07
173100	1.14686e-07
173200	1.14286e-07
173300	1.13667e-07
173400	1.15001e-07
173500	1.13203e-07
173600	1.11405e-07
173700	1.12193e-07
173800	1.1346e-07
173900	1.12468e-07
174000	1.1349e-07
174100	1.15921e-07
174200	1.16853e-07
174300	1.16803e-07
174400	1.15911e-07
174500	1.14221e-07
174600	1.14288e-07
174700	1.15498e-07
174800	1.21565e-07
174900	1.16101e-07
175000	1.16426e-07
175100	1.15549e-07
175200	1.12008e-07
175300	1.15875e-07
175400	1.15123e-07
175500	1.1501e-07
175600	1.17142e-07
175700	1.1764e-07
175800	1.14433e-07
175900	1.1947e-07
176000	1.18246e-07
176100	1.14981e-07
176200	1.12918e-07
176300	1.1943e-07
176400	1.23e-07
176500	1.23024e-07
176600	1.15603e-07
176700	1.14303e-07
176800	1.12516e-07
176900	1.14377e-07
177000	1.12956e-07
177100	1.13886e-07
177200	1.16803e-07
177300	1.17247e-07
177400	1.15712e-07
177500	1.14354e-07
177600	1.14893e-07
177700	1.15583e-07
177800	1.18917e-07
177900	1.13641e-07
178000	1.12999e-07
178100	1.12433e-07
178200	1.14617e-07
178300	1.14872e-07
178400	1.14515e-07
178500	1.142e-07
178600	1.15427e-07
178700	1.17692e-07
178800	1.13067e-07
178900	1.10022e-07
179000	1.14236e-07
179100	1.1571e-07
179200	1.14835e-07
179300	1.195e-07
179400	1.15929e-07
179500	1.14053e-07
179600	1.83307e-07
179700	2.4725e-06
179800	2.98618e-06
179900	2.80805e-07
180000	1.20136e-07
180100	1.16755e-07
180200	1.12395e-07
180300	1.12928e-07
180400	1.17502e-07
180500	1.15121e-07
180600	1.18277e-07
180700	1.14704e-07
180800	1.15102e-07
180900	1.16143e-07
181000	1.1532e-07
181100	1.12886e-07
181200	1.11377e-07
181300	1.13501e-07
181400	1.15322e-07
181500	1.12362e-07
181600	1.1165e-07
181700	1.10223e-07
181800	1.1373e-07
181900	1.18614e-07
182000	1.20637e-07
182100	1.16398e-07
182200	1.16164e-07
182300	1.17167e-07
182400	1.16183e-07
182500	1.12645e-07
182600	1.15876e-07
182700	1.17193e-07
182800	1.11792e-07
182900	1.14518e-07
183000	1.17392e-07
183100	1.13485e-07
183200	1.15682e-07
183300	1.14238e-07
183400	1.12232e-07
183500	1.11962e-07
183600	1.11008e-07
183700	1.18929e-07
183800	1.14273e-07
183900	1.13337e-07
184000	1.16845e-07
184100	1.13606e-07
184200	1.14743e-07
184300	1.1251e-07
184400	1.10304e-07
184500	1.16891e-07
184600	1.16819e-07
184700	1.09036e-07
184800	1.09978e-07
184900	1.19176e-07
185000	1.50107e-07
185100	1.90448e-07
185200	1.25426e-07
185300	1.14229e-07
185400	1.13401e-07
185500	1.15699e-07
185600	1.16077e-07
185700	1.15712e-07
185800	1.11445e-07
185900	1.13172e-07
186000	1.2125e-07
186100	1.19613e-07
186200	1.17349e-07
186300	1.17866e-07
186400	1.14422e-07
186500	1.12958e-07
186600	1.11598e-07
186700	1.11955e-07
186800	1.0896e-07
186900	1.11634e-07
187000	1.13645e-07
187100	1.14495e-07
187200	1.1447e-07
187300	1.12989e-07
187400	1.13686e-07
187500	1.14789e-07
187600	1.11637e-07
187700	1.09968e-07
187800	1.13586e-07
187900	1.17642e-07
188000	1.11124e-07
188100	1.13384e-07
188200	1.12001e-07
188300	1.09635e-07
188400	1.0956e-07
188500	1.16453e-07
188600	1.17455e-07
188700	1.17136e-07
188800	1.14889e-07
188900	1.0988e-07
189000	1.071e-07
189100	1.11448e-07
189200	1.12705e-07
189300	1.13716e-07
189400	1.13204e-07
189500	1.13909e-07
189600	1.12802e-07
189700	1.14928e-07
189800	1.13865e-07
189900	1.13249e-07
190000	1.13402e-07
190100	1.15123e-07
190200	1.1538e-07
190300	1.14321e-07
190400	1.15655e-07
190500	1.15511e-07
190600	1.17481e-07
190700	1.16341e-07
190800	1.15146e-07
190900	1.1346e-07
191000	1.14202e-07
191100	1.16513e-07
191200	1.16866e-07
191300	1.14316e-07
191400	1.12097e-07
191500	1.1374e-07
191600	1.15759e-07
191700	1.16471e-07
191800	1.15464e-07
191900	1.12391e-07
192000	1.15659e-07
192100	1.13817e-07
192200	1.14766e-07
192300	1.16988e-07
192400	1.1615e-07
192500	1.14883e-07
192600	1.13642e-07
192700	1.15783e-07
192800	1.15239e-07
192900	1.09039e-07
193000	1.09396e-07
193100	1.10404e-07
193200	1.14219e-07
193300	1.14615e-07
193400	1.13252e-07
193500	1.14188e-07
193600	1.15547e-07
193700	1.1542e-07
193800	1.15173e-07
193900	1.11588e-07
194000	1.11029e-07
194100	1.14641e-07
194200	1.1572e-07
194300	1.14397e-07
194400	1.13516e-07
194500	1.1545e-07
194600	1.13476e-07
194700	1.13741e-07
194800	1.16232e-07
194900	1.15606e-07
195000	1.10312e-07
195100	1.12423e-07
195200	1.11841e-07
195300	1.15081e-07
195400	1.12436e-07
195500	1.14078e-07
195600	1.16708e-07
195700	1.15088e-07
195800	1.14478e-07
195900	1.0907e-07
196000	1.08192e-07
196100	1.13103e-07
196200	1.12075e-07
196300	1.13832e-07
196400	1.11853e-07
196500	1.16296e-07
196600	1.17838e-07
196700	1.13895e-07
196800	1.11743e-07
196900	1.13115e-07
197000	1.09789e-07
197100	1.10526e-07
197200	1.08752e-07
197300	1.12115e-07
197400	1.14501e-07
197500	1.12294e-07
197600	1.14211e-07
197700	1.13766e-07
197800	1.16793e-07
197900	1.13524e-07
198000	1.13131e-07
198100	1.15555e-07
198200	1.10046e-07
198300	1.13677e-07
198400	1.123e-07
198500	1.14074e-07
198600	1.16385e-07
198700	1.13869e-07
198800	1.11404e-07
198900	1.14481e-07
199000	1.16148e-07
199100	1.10837e-07
199200	1.09634e-07
199300	1.12635e-07
199400	1.1337e-07
199500	1.1371e-07
199600	1.1505e-07
199700	1.1654e-07
[truncated: 1,003 more rows]
